# Supplementary material for: Electronic structure analysis of electrochemical CO2reduction by iron-porphyrins reveals basic requirements for design of catalysts bearing non-innocent ligands
Source: Royal Society of Chemistry journal article supplement (doi:10.1039/d2sc01863b), 2022-01-01
Supplement: d2sc01863b1.pdf [file d2sc01863b1.pdf]

## Supporting Information

# Electronic structure analysis of electrochemical CO<sub>2</sub> reduction by iron-porphyrins reveals basic requirements to design catalysts bearing non-innocent ligands

Maxime Tarrago, Shengfa Ye<sup>\*,†,§</sup> and Frank Neese<sup>\*,†</sup>

<sup>†</sup>Max-Planck-Institut für Kohlenforschung, Kaiser-Wilhelm-Platz 1, D-45470 Mülheim an der Ruhr, Germany

<sup>‡</sup>Max-Planck-Institut für Chemische Energiekonversion, Stiftstr. 34-36, D-45470 Mülheim an der Ruhr, Germany

<sup>§</sup>State Key Laboratory of Catalysis, Dalian Institute of Chemical Physics, Chinese Academy of Sciences, Dalian 116023, China

|                                                                                                                        |           |
|------------------------------------------------------------------------------------------------------------------------|-----------|
| <b>1) Catalytic performances and redox potentials of the mentioned catalytic systems.....</b>                          | <b>7</b>  |
| Table S1.....                                                                                                          | 7         |
| <b>2) Relaxed surface scans.....</b>                                                                                   | <b>8</b>  |
| Figure S1 .....                                                                                                        | 8         |
| Figure S2 .....                                                                                                        | 9         |
| <b>3) Alternative reactivity .....</b>                                                                                 | <b>10</b> |
| Figure S3 .....                                                                                                        | 10        |
| <b>a) Spin crossovers.....</b>                                                                                         | <b>10</b> |
| Figure S4 .....                                                                                                        | 12        |
| Table S2.....                                                                                                          | 12        |
| Figure S5 .....                                                                                                        | 14        |
| <b>b) HER/HCOOH formation.....</b>                                                                                     | <b>15</b> |
| Figure S6 .....                                                                                                        | 16        |
| Figure S7 .....                                                                                                        | 17        |
| <b>4) Calculation of the turnover frequency for <math>^1I^{2-}</math>.....</b>                                         | <b>17</b> |
| <b>5) Electronic structure of the additonnal intermediates .....</b>                                                   | <b>20</b> |
| <b>a) The transition states electronic structures .....</b>                                                            | <b>20</b> |
| Figure S8 .....                                                                                                        | 20        |
| <b>b) Intermediates in the reduction of CO<sub>2</sub> catalyzed with [Fe(qpy)]<sup>+</sup>.....</b>                   | <b>21</b> |
| Table S3.....                                                                                                          | 21        |
| Figure S9 .....                                                                                                        | 23        |
| <b>c) Intermediates in the reduction of CO<sub>2</sub> catalyzed with [Fe(bpy<sup>NHEt</sup>PY2Me)] .....</b>          | <b>23</b> |
| Table S4.....                                                                                                          | 24        |
| Figure S10 .....                                                                                                       | 25        |
| <b>d) Intermediates in the reduction of CO<sub>2</sub> catalyzed with [Co(qpy)] .....</b>                              | <b>26</b> |
| Table S5.....                                                                                                          | 26        |
| Figure S11 .....                                                                                                       | 28        |
| <b>e) Intermediates in the reduction of CO<sub>2</sub> catalyzed with [Co(L)] .....</b>                                | <b>29</b> |
| Table S6.....                                                                                                          | 29        |
| Figure S12 .....                                                                                                       | 31        |
| <b>f) Intermediates in the reduction of CO<sub>2</sub> catalyzed with [Mn (bpy)(CO)<sub>3</sub>]K.....</b>             | <b>32</b> |
| Figure S13 .....                                                                                                       | 34        |
| <b>g) Intermediates in the reduction of CO<sub>2</sub> catalyzed with [Cr(bpy)(CO)<sub>3</sub>]<sup>2-</sup> .....</b> | <b>34</b> |
| Table S7.....                                                                                                          | 34        |

|                                                                                                                                                                                                                |           |
|----------------------------------------------------------------------------------------------------------------------------------------------------------------------------------------------------------------|-----------|
| Figure S14 .....                                                                                                                                                                                               | 36        |
| <b>h) Intermediates in the reduction of CO<sub>2</sub> catalyzed with [Ru(bpy)<sub>2</sub>(CO)] .....</b>                                                                                                      | <b>37</b> |
| Table S8.....                                                                                                                                                                                                  | 37        |
| Figure S15 .....                                                                                                                                                                                               | 38        |
| <b>i) Intermediates in the reduction of CO<sub>2</sub> catalyzed with [Ru(bpy)(tpy)] .....</b>                                                                                                                 | <b>39</b> |
| Table S9.....                                                                                                                                                                                                  | 39        |
| Figure S16 .....                                                                                                                                                                                               | 41        |
| <b>6) Energy of the calculated structures.....</b>                                                                                                                                                             | <b>42</b> |
| Table S10.....                                                                                                                                                                                                 | 42        |
| <b>7) Cartesian coordinates and imaginary normal modes of vibrations for the intermediates and transition states involved in CO<sub>2</sub> reduction and H<sub>2</sub> generation by I<sup>2-</sup> .....</b> | <b>43</b> |
| <b>a) <sup>3</sup>1.....</b>                                                                                                                                                                                   | <b>43</b> |
| <b>b) <sup>2</sup>1-.....</b>                                                                                                                                                                                  | <b>46</b> |
| <b>c) <sup>1</sup>1<sup>2-</sup>.....</b>                                                                                                                                                                      | <b>48</b> |
| <b>d) <sup>3</sup>1<sup>2-</sup>.....</b>                                                                                                                                                                      | <b>51</b> |
| <b>e) <sup>5</sup>1<sup>2-</sup>.....</b>                                                                                                                                                                      | <b>53</b> |
| <b>f) <sup>1</sup>TS1.....</b>                                                                                                                                                                                 | <b>56</b> |
| Figure S17 .....                                                                                                                                                                                               | 56        |
| <b>g) <sup>1</sup>A.....</b>                                                                                                                                                                                   | <b>59</b> |
| Figure S18 .....                                                                                                                                                                                               | 59        |
| <b>h) <sup>3</sup>A.....</b>                                                                                                                                                                                   | <b>62</b> |
| <b>i) <sup>5</sup>A.....</b>                                                                                                                                                                                   | <b>64</b> |
| <b>j) <sup>1</sup>B.....</b>                                                                                                                                                                                   | <b>67</b> |
| <b>k) <sup>1</sup>C.....</b>                                                                                                                                                                                   | <b>70</b> |
| Figure S19 .....                                                                                                                                                                                               | 70        |
| <b>l) <sup>1</sup>TS2.....</b>                                                                                                                                                                                 | <b>74</b> |
| Figure S20 .....                                                                                                                                                                                               | 74        |
| <b>m) <sup>1</sup>TS3.....</b>                                                                                                                                                                                 | <b>77</b> |
| Figure S21 .....                                                                                                                                                                                               | 78        |
| <b>n) <sup>1</sup>D.....</b>                                                                                                                                                                                   | <b>81</b> |
| <b>o) <sup>3</sup>D.....</b>                                                                                                                                                                                   | <b>83</b> |

|     |                                                                                      |     |
|-----|--------------------------------------------------------------------------------------|-----|
| p)  | <sup>5</sup> D.....                                                                  | 86  |
| q)  | <sup>1</sup> TS5.....                                                                | 89  |
| r)  | <sup>1</sup> E.....                                                                  | 92  |
|     | Figure S23.....                                                                      | 92  |
| s)  | <sup>1</sup> TS4.....                                                                | 95  |
|     | Figure S24.....                                                                      | 96  |
| t)  | <sup>1</sup> F.....                                                                  | 99  |
| u)  | <sup>3</sup> F.....                                                                  | 101 |
|     | Figure S25.....                                                                      | 102 |
| v)  | <sup>5</sup> F.....                                                                  | 104 |
| w)  | <sup>1</sup> TS6.....                                                                | 107 |
|     | Figure S26.....                                                                      | 107 |
| x)  | <sup>1</sup> M.....                                                                  | 110 |
| y)  | <sup>3</sup> M.....                                                                  | 113 |
| z)  | <sup>5</sup> M.....                                                                  | 115 |
| aa) | <sup>1</sup> N.....                                                                  | 118 |
| bb) | <sup>3</sup> N.....                                                                  | 120 |
| cc) | <sup>5</sup> N.....                                                                  | 123 |
| 8)  | <i>Cartesian coordinates of the other compounds investigated in the studies.....</i> | 126 |
| a)  | <sup>2</sup> 4 <sup>0</sup> .....                                                    | 126 |
| b)  | <sup>2</sup> G.....                                                                  | 127 |
| c)  | <sup>2</sup> H.....                                                                  | 129 |
| d)  | <sup>2</sup> I.....                                                                  | 130 |
| e)  | <sup>17</sup> -K <sup>+</sup> .....                                                  | 131 |
| f)  | <sup>1</sup> J.....                                                                  | 132 |
| g)  | <sup>1</sup> K.....                                                                  | 133 |
| h)  | <sup>2</sup> L.....                                                                  | 134 |
| i)  | <sup>2</sup> 2 <sup>+</sup> .....                                                    | 135 |
| j)  | <sup>2</sup> [Fe(qpy)(CO <sub>2</sub> )] <sup>+</sup> .....                          | 137 |

|     |                                                                                    |     |
|-----|------------------------------------------------------------------------------------|-----|
| k)  | $^1[\text{Fe}(\text{qpy})(\text{CO}_2)]$ .....                                     | 138 |
| l)  | $^1[\text{Fe}(\text{qpy})(\text{CO}_2\text{H})]^+$ .....                           | 139 |
| m)  | $^1[\text{Fe}(\text{qpy})(\text{CO})]^{2+}$ .....                                  | 141 |
| n)  | $^3\text{3}^0$ .....                                                               | 142 |
| o)  | $^3[\text{Fe}(\text{bpy}^{\text{NHEt}}\text{PY2Me})(\text{CO}_2)]$ .....           | 144 |
| p)  | $^3[\text{Fe}(\text{bpy}^{\text{NHEt}}\text{PY2Me})(\text{CO}_2\text{H})]^+$ ..... | 146 |
| q)  | $^3[\text{Fe}(\text{bpy}^{\text{NHEt}}\text{PY2Me})(\text{CO})]^{2+}$ .....        | 147 |
| r)  | $^2\text{5}^0$ .....                                                               | 149 |
| s)  | $^2[\text{Co}(\text{qpy})(\text{CO}_2)]$ .....                                     | 150 |
| t)  | $^2[\text{Co}(\text{qpy})(\text{CO}_2\text{H})]^+$ .....                           | 152 |
| u)  | $^2[\text{Co}(\text{qpy})(\text{CO})]^{2+}$ .....                                  | 153 |
| v)  | $^2\text{6}^0$ .....                                                               | 155 |
| w)  | $^2[\text{Co}(\text{L})(\text{CO}_2)]$ .....                                       | 156 |
| x)  | $^2[\text{Co}(\text{L})(\text{CO}_2\text{H})]^+$ .....                             | 158 |
| y)  | $^2[\text{Co}(\text{L})(\text{CO})]^{2+}$ .....                                    | 159 |
| z)  | $^1\text{8}^-$ .....                                                               | 161 |
| aa) | $^1[\text{Mn}(\text{bpy})(\text{CO})_3(\text{CO}_2)]\text{K}$ .....                | 161 |
| bb) | $^1[\text{Mn}(\text{bpy})(\text{CO})_3(\text{CO}_2\text{H})]\text{K}^+$ .....      | 163 |
| cc) | $^2[\text{Mn}(\text{bpy})(\text{CO})_3(\text{CO})]$ .....                          | 164 |
| dd) | $^1\text{9}^{2-}$ .....                                                            | 165 |
| ee) | $^1[\text{Cr}(\text{bpy})(\text{CO})_3(\text{CO}_2)]^{2-}$ .....                   | 165 |
| ff) | $^1[\text{Cr}(\text{bpy})(\text{CO})_3(\text{CO}_2\text{H})]^-$ .....              | 166 |
| gg) | $^2[\text{Cr}(\text{bpy})(\text{CO})_4]^-$ .....                                   | 167 |
| hh) | $^1\text{10}^0$ .....                                                              | 168 |
| ii) | $^1[\text{Ru}(\text{bpy})_2(\text{CO})(\text{CO}_2)]$ .....                        | 170 |
| jj) | $^1[\text{Ru}(\text{bpy})_2(\text{CO})(\text{CO}_2\text{H})]^+$ .....              | 171 |
| kk) | $^1[\text{Ru}(\text{bpy})_2(\text{CO})_2]^{2+}$ .....                              | 173 |
| ll) | $^1\text{11}^0$ .....                                                              | 174 |

|     |                                                               |     |
|-----|---------------------------------------------------------------|-----|
| mm) | $^1[\text{Ru}(\text{tpy})(\text{bpy})(\text{CO}_2)]$ .....    | 176 |
| nn) | $^1[\text{Ru}(\text{tpy})(\text{bpy})(\text{CO})]^{2+}$ ..... | 178 |
| 9)  | <i>Bibliography</i> .....                                     | 179 |

1) Catalytic performances and redox potentials of the mentioned catalytic systems

**Table S1:** Reported catalytic performances of the catalytic systems in Scheme 1. The electrolysis potential corresponds to the potential at which the Turnover frequency (TOF, calculated according to several different methods, see below) or turnover number (TON, defined as  $n_{\text{product}}/n_{\text{Catalyst}}$ ) is measured. In cases where the  $\text{TOF}_{\text{max}}$  is obtained from foot-of-the-wave analysis, or in cases where neither TON nor TOF are measured, the potential corresponds to that of the peak of the CV catalytic wave. The turnover frequencies are given in  $\text{s}^{-1}$ . The Faradaic efficiency (FE) is defined as the proportion of coulomb passing through the electrode participating in the  $\text{CO}_2$ -to- $\text{CO}$  conversion reaction. Non-disclosed values are signalled by the initials “N.D.”.

| Species                                     | Electrolysis potential (V, vs SCE)   | TOF ( $\text{s}^{-1}$ ) <sup>a)</sup> | TON/CPE time | FE    | Reference |
|---------------------------------------------|--------------------------------------|---------------------------------------|--------------|-------|-----------|
| [Fe(TPP)]                                   | -1.64 in DMF                         | >10 <sup>4</sup><br>(FOWA)            | ND           | ~100% | 1         |
| [Co(N <sub>4</sub> H)]                      | -1.7 in MeCN                         | N.D.                                  | 4.1/0.7h     | 45%   | 2         |
| [Cr(bpy)(CO) <sub>3</sub> ]                 | -2.8 vs Fc/Fc <sup>+</sup><br>in NMP | N. D.                                 | N.D.         | N. D. | 3         |
| [Mn(R-bpy)(CO) <sub>3</sub> ] <sup>b)</sup> | -1.8 in MeCN                         | 5000 (CV)                             | 4/1.2h       | 98%   | 4         |
| [Re(R-bpy)(CO) <sub>3</sub> ] <sup>c)</sup> | -1.7 in MeCN                         | >6206<br>(CV)                         | N.D.         | 96%   | 5         |
| [Co(L)]                                     | -1.5 in DMF                          | N. D.                                 | N.D.         | 82%   | 6         |
| [Ru(bpy) <sub>2</sub> (CO)]                 | -1.5 in H <sub>2</sub> O             | N.D.                                  | 26.2/N.D.    | 51%   | 7         |
| [Ru(bpy)(tpy)]                              | -1.5 vs NHE<br>in MeCN               | N.D.                                  | 5/5h         | 76%   | 8         |
| [Fe(bpy <sup>NHE</sup> PY2Me)]              | -1.5 in MeCN                         | 2067<br>(FOWA)                        | N.D.         | 81%   | 9         |
| [Fe(qpy)]                                   | -1.2 in MeCN                         | N.D.                                  | 12/4h        | 70%   | 10        |
| [Co(qpy)]                                   | -1.3 in MeCN                         | 3.3 x 10 <sup>4</sup>                 | 64/8h        | 87%   | 10        |

a) The method affording the turnover frequency is displayed between brackets: FOWA=Foot-Of-the-Wave-Analysis,<sup>11</sup> CV= Cyclic Voltammetry where the TOF is determined from the current plateau  $i_c/i_p$ .<sup>12</sup>

b) R= mesityl

c) R=<sup>t</sup>Bu

2) Relaxed surface scans

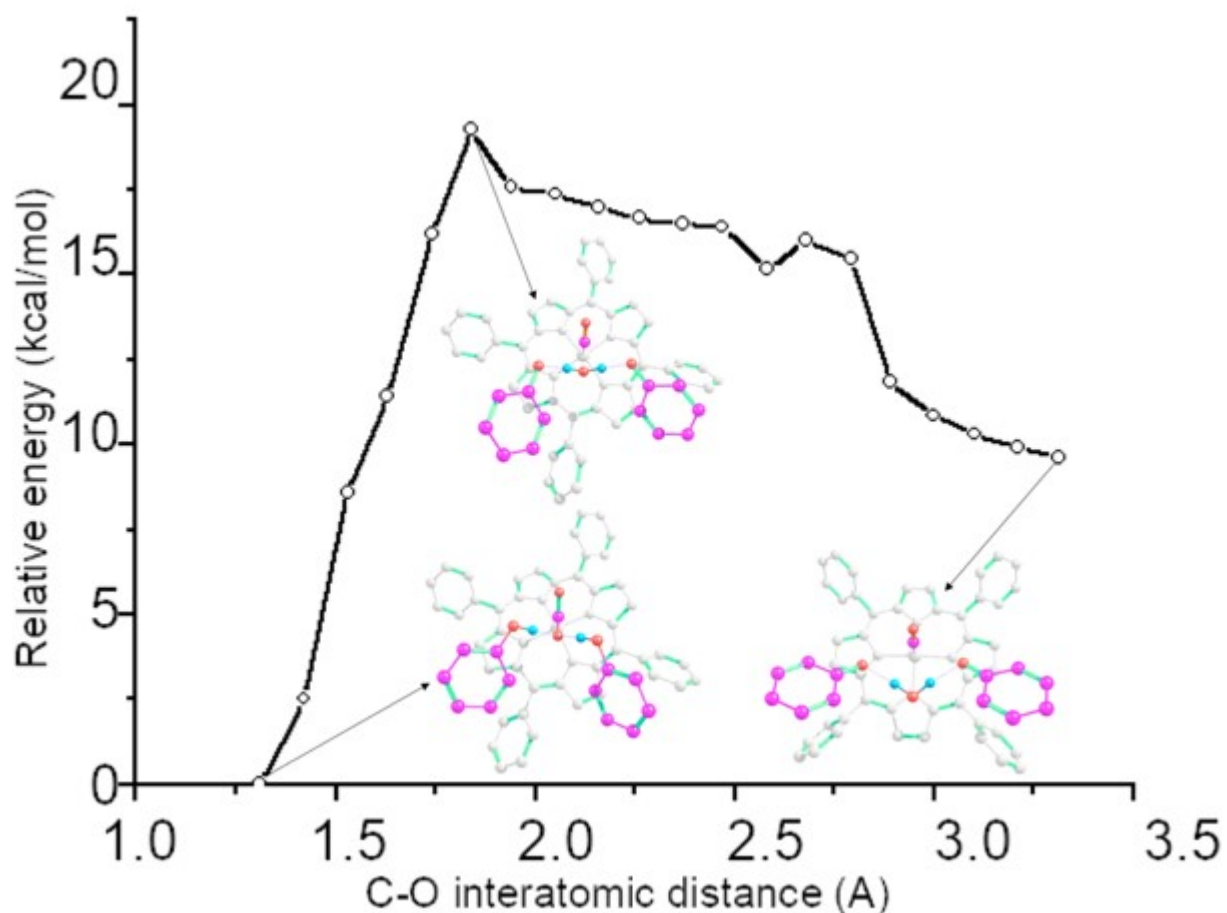

**Figure S1:** Relaxed surface scan of the C-O interatomic distance of the CO<sub>2</sub> moiety in <sup>1</sup>C. Selected pictures of the structures corresponding to a distance of 1.3 (equilibrium distance in <sup>1</sup>C), 1.8 and 3.3 Å are shown. For clarity, all hydrogens except those belonging to the two transferred protons are hidden, and all atoms except those constituting the two phenols and the CO<sub>2</sub> moiety are greyed out.



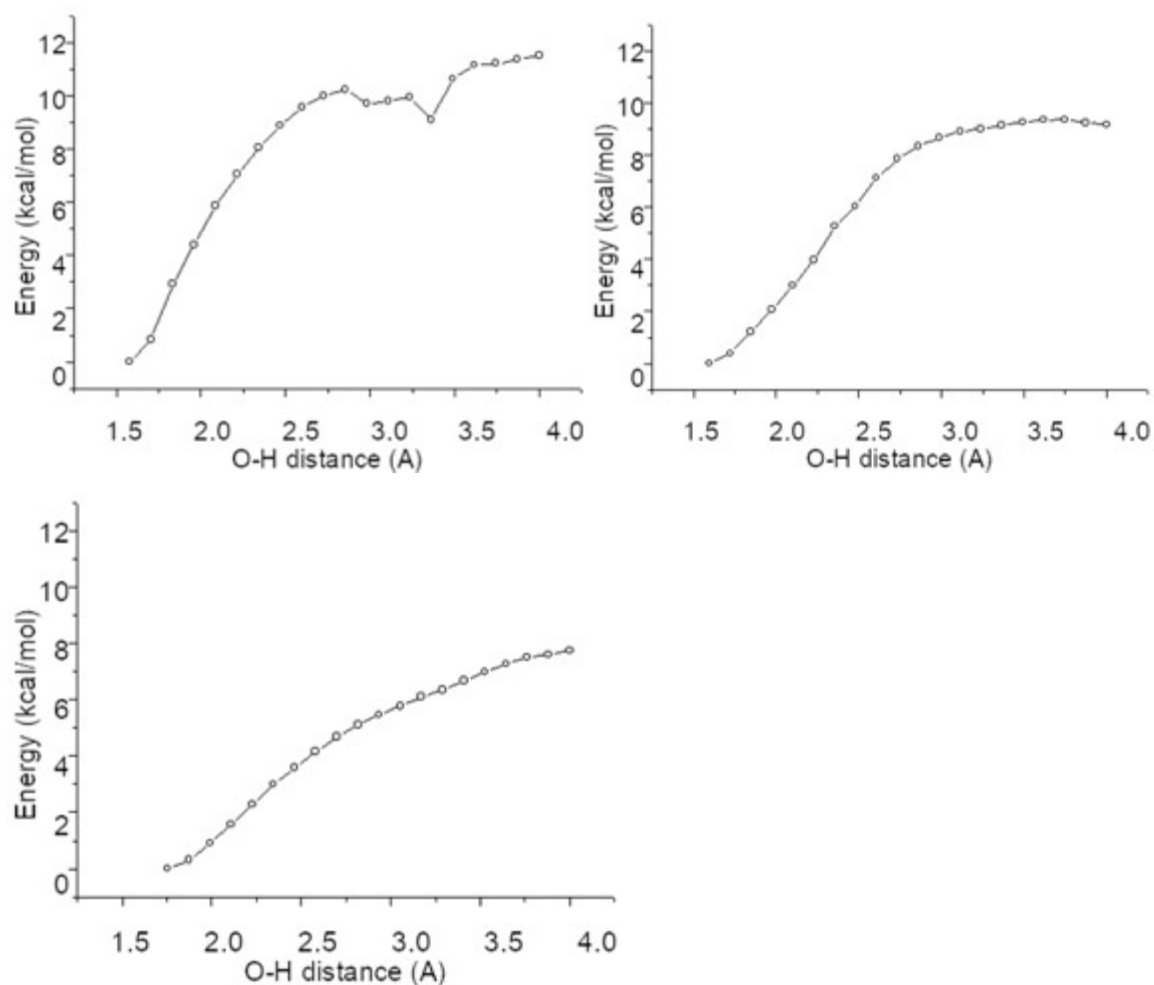

**Figure S2:** Relaxed electronic energy surface scan of the interatomic distance between the hydrogen of the phenol and one oxygen of the  $\text{CO}_2$  moiety in the intermediate  $^1\mathbf{B}$  (Top, left), relaxed electronic energy surface scan of the interatomic distance between the hydrogen of one phenol and the oxygen of the  $\text{CO}_2$  moiety in the intermediate  $^1\mathbf{C}$  (Top, right), relaxed electronic energy surface scan of the interatomic distance between the hydrogen of the phenol and the protonated oxygen of the  $\text{CO}_2\text{H}$  moiety in the  $^1\mathbf{E}$  intermediate (bottom). Energies are given relative to the lowest point on the surface for each case.

### 3) Alternative reactivity

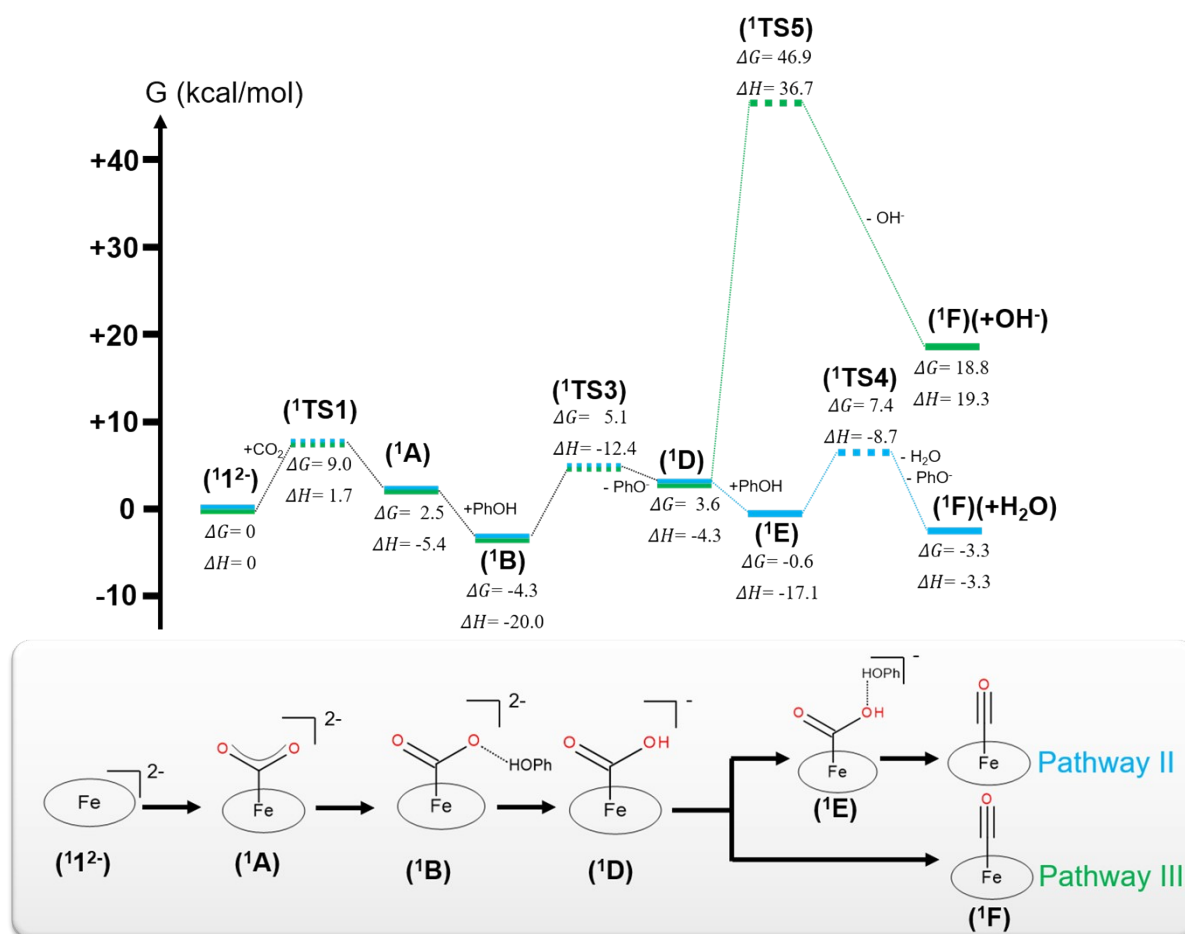

**Figure S3:** (Top) Energy landscape of the intermediates and transition states involved in the CO<sub>2</sub>-to-CO reduction according to pathways II and III. Intermediates are displayed by solid lines and transition states are displayed by dashed lines. Intermediates belonging to pathway II are represented by blue lines and those selectively belonging to pathway III are represented by green lines. The Gibbs free energy changes and enthalpy changes were computed with respect to intermediates  $1^{12-}$  and all reactants infinitely separated in DMF. (Bottom) Schematic representation of the intermediates for each pathway, shown by order of formation in pathway II (blue) and pathway III (green).

#### a) Spin crossovers

Experimental data conclude the molecular catalyst is an overall singlet in its ground state.<sup>13</sup> In the main text, we focus on the singlet state for all intermediates. However, the triplet and

singlet states of [Fe(TPP)] are respectively found 5.7 kcal/mol and 12.1 kcal/mol above the singlet state by our DFT calculations. Such low energy separations suggest that a spin crossover might be possible during the reaction. Because none of the intermediates have been isolated experimentally, the possibility of a spin crossover must be investigated by DFT calculations. However, as seen in Table S2, the free energy of the intermediates in both triplets and quintet pathways are significantly unfavorable compared to the intermediates of the singlet pathway. In the triplet pathway, the formation of the metal-CO<sub>2</sub> adduct is energetically neutral, a behavior undistinguishable from that of the singlet pathway within the typical error range of DFT. On the other hand, the formation of the metallacarboxylic acid, unlike for the singlet pathway, is highly endergonic. In fact, it is about 12.3 kcal/mol higher than the corresponding singlet intermediate (Table S2). The cleavage of the C-O bond step yields a triplet metal-carbonyl adduct that is about 5.1 kcal/mol higher in energy than its singlet counterpart. In the quintet pathway, the formation of the metal-CO<sub>2</sub> adduct was found unstable, and the adduct spontaneously dissociated upon geometry optimization. A relaxed surface scan of the Fe-C bond (Figure S4) confirmed that the adduct is unstable.

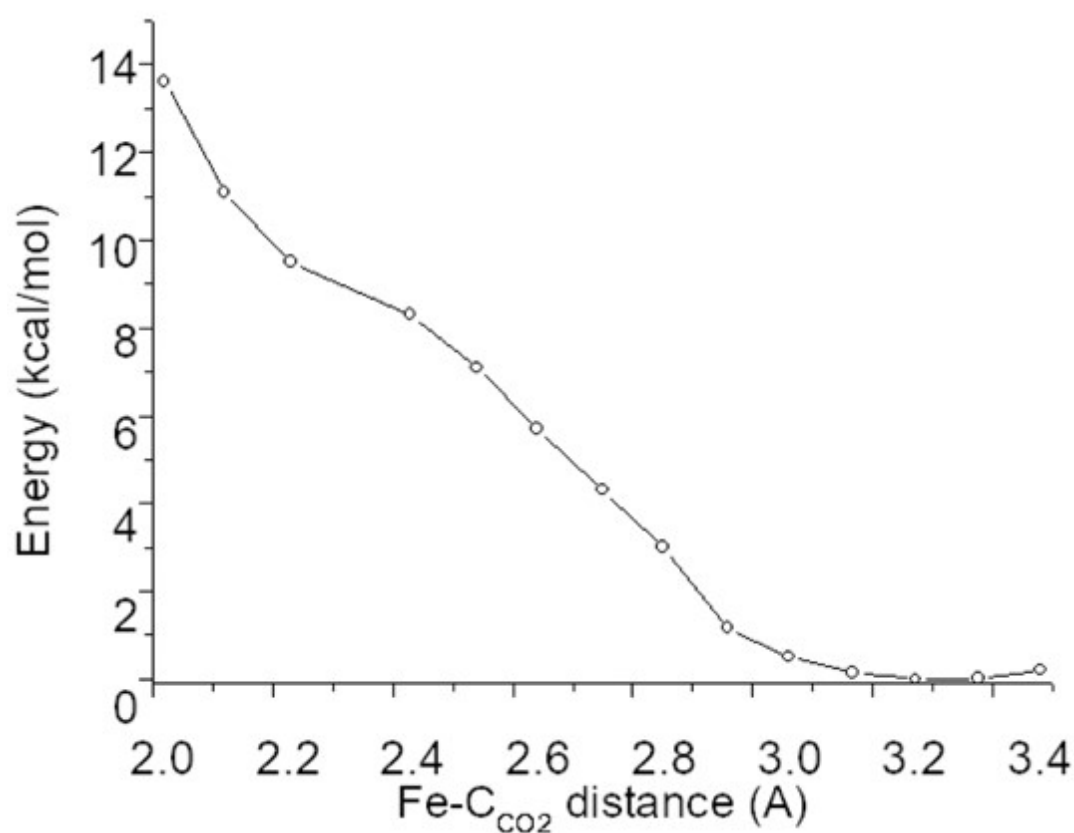

**Figure S4:** Evolution of the electronic energy of the quintet intermediate  $^5[\text{Fe}(\text{TPP})(\text{CO}_2)]^{2-}$  with the relaxed surface scan of the Fe-C<sub>CO2</sub> interatomic distance. Relative energies are given with respect to the lowest point on the surface.

Once protonated, the adduct remained stable, but its free energy was found lying 18.1 kcal/mol higher than the singlet metallacarboxylic acid. Finally, after the C-O bond cleavage step, the quintet metal-carbonyl complex lies 7.0 kcal/mol above the corresponding singlet intermediate. Hence, key-intermediates involved in the triplet and quintet pathways are strongly disfavored thermodynamically, rendering spin crossover unlikely, and establishing the singlet pathway as the most favorable. Overall, the significant differences in free energy have an enthalpic origin (Table S10), and are likely to be explained on the basis of differences in electronic structure. In fact, these differences can be attributed to the non-innocence of the ligand, as rationalized in the next paragraphs.

**Table S2:** Relative energy of the intermediates in the CO<sub>2</sub> to CO conversion reaction (pathway II) in kcal/mol. The chosen reference corresponds to all the reactive infinitely separated in DMF ([Fe(TPP)] in singlet state). The mention “Unstable” accounts for the fact that the adduct dissociates spontaneously into  $^5\mathbf{1}^{2-}$  and CO<sub>2</sub>.

| Intermediate      | S=0  | S=1   | S=2      |
|-------------------|------|-------|----------|
| $\mathbf{1}^{2-}$ | 0    | +5.7  | +12.1    |
| <b>A</b>          | +2.5 | +5.5  | Unstable |
| <b>D</b>          | +3.2 | +15.5 | +21.3    |
| <b>F</b>          | -3.3 | +1.8  | +3.7     |

The differences in energy between the singlet, triplet and quintet intermediates can be rationalized in the basis of the different electronic structures of  $\mathbf{1}^{2-}$ ,  $\mathbf{3}^{12-}$  and  $\mathbf{5}^{12-}$ . The singlet state  $\mathbf{1}^{2-}$  contains an intermediate spin ferrous center interacting *antiferromagnetically* with a porphyrin di-radical tetra-anion.  $\mathbf{3}^{12-}$  also contains an intermediate spin ferrous center but interacting with a singlet diradical TPP tetra-anion with one  $\alpha$  electron and one  $\beta$  electron occupying its  $1e_g$  orbitals.  $\mathbf{5}^{12-}$  contains an intermediate spin ferrous center too, but interacting *ferromagnetically* with a S=1 diradical TPP tetra-anion with one  $\alpha$  electron occupying each of its  $1e_g$  orbitals (Figure S5). Consequently, in the triplet and quintet pathways, either one or two electron transfers from the ligand-based  $1e_g$  orbitals to the metal-centered  $d_{xz,yz}$  orbitals are spin-

forbidden. Consequently, the chemical steps involving such transfers in the singlet pathway cannot involve equivalent transfers on higher spin state surfaces. Instead, either the metal center acquires a higher oxidation state, which hinders its donating ability, or ligand-to-metal electron transfers occur via populating highly antibonding orbitals, which comes at an energetic cost (Figure S5). The electronic structure evolution on the triplet and quintet surfaces are now described in details and compared to the corresponding intermediates on the singlet surface. Such an analysis illustrates the crucial importance of ligand-to-metal electron transfer in the reactivity.

In the triplet pathway, the formation of the adduct  ${}^3\mathbf{A}$  is almost iso-energetic to the corresponding step in the singlet pathway because the ligand-to-metal electron transfer is spin-allowed in both cases (Figure S5). Hence both  ${}^1\mathbf{A}$  and  ${}^3\mathbf{A}$  feature Fe(I) centers with similar donating ability towards  $\text{CO}_2$ . However, the formation of  ${}^3\mathbf{D}$  is highly disfavored compared to the formation of  ${}^1\mathbf{D}$  because for the former, the second ligand-to-metal electron transfer is spin-forbidden. Therefore in  ${}^3\mathbf{D}$  the metal possesses a higher oxidation state than that of  ${}^1\mathbf{D}$ . Hence, the  ${}^3\mathbf{D}$  intermediate is destabilized by as much as 12.7 kcal/mol compared to its singlet counterpart  ${}^1\mathbf{D}$  because the higher oxidation state of the metal center hinders its donating ability towards  $\text{CO}_2$ . In details, the iron center in  ${}^3\mathbf{D}$  is best described as a resonant form between a Fe(III) and a Fe(I) center; while in  ${}^1\mathbf{D}$  the metal is best described as a resonant form between Fe(II) and Fe(0) (Figure S5). Finally, the C-O bond cleavage affording  ${}^3\mathbf{F}$  triggers a second ligand-to-metal electron transfer. Like in  ${}^1\mathbf{F}$ , the intermediate may be described as a Fe(II) center bound to a carbonyl ligand. However, unlike for  ${}^1\mathbf{F}$ , transfer from the  $\text{TPP-}1e_g(x)$  to the Fe- $d_{xz}$  orbital is spin-forbidden. Instead, the electron is transferred to the antibonding  $\sigma_{\text{Fe-CO}_2\text{H}}^*$  orbital, which energy is somewhat lowered by the C-O bond cleavage, but remains highly antibonding. Consequently, the energy of  ${}^3\mathbf{F}$  is higher than that of  ${}^1\mathbf{F}$ .

In the quintet pathway, the  ${}^5\mathbf{A}$  adduct spontaneously dissociates upon geometry optimization. This can be easily rationalized on the basis of the ligand-to-metal electron transfers being spin-forbidden. Hence, unlike in the singlet and triplet surface, the oxidation state of the metal remains +II as the  $\text{CO}_2$  approaches and its donor ability is not sufficient to bind it. The protonated adduct  ${}^5\mathbf{D}$  is stable but thermodynamically disfavored compared to its singlet counterpart. In fact, the species is best described as a Fe(II) ferromagnetically-coupled to a porphyrin radical, like the triplet  ${}^3\mathbf{D}$ . However,  ${}^5\mathbf{D}$  is higher in energy than  ${}^3\mathbf{D}$ , because the electronic configuration of iron differs from the latter by a promotion of an electron from the non-bonding Fe- $d_{yz}$  orbital to the antibonding  $\sigma_{\text{Fe-CO}_2\text{H}}^*$ , which is energetically unfavorable. The

population of  $\sigma_{\text{Fe-CO}_2\text{H}}^*$  is unavoidable in  $^5\text{D}$  because both Fe  $d_{xz}$  and Fe  $d_{yz}$  are unavailable for a ligand-to-metal electron transfer.

The study of the triplet and quintet surface thus exemplifies how intramolecular electron transfers from the ligand to the metal are crucial in enhancing the donor ability of the metal, thus stabilizing key-intermediates.

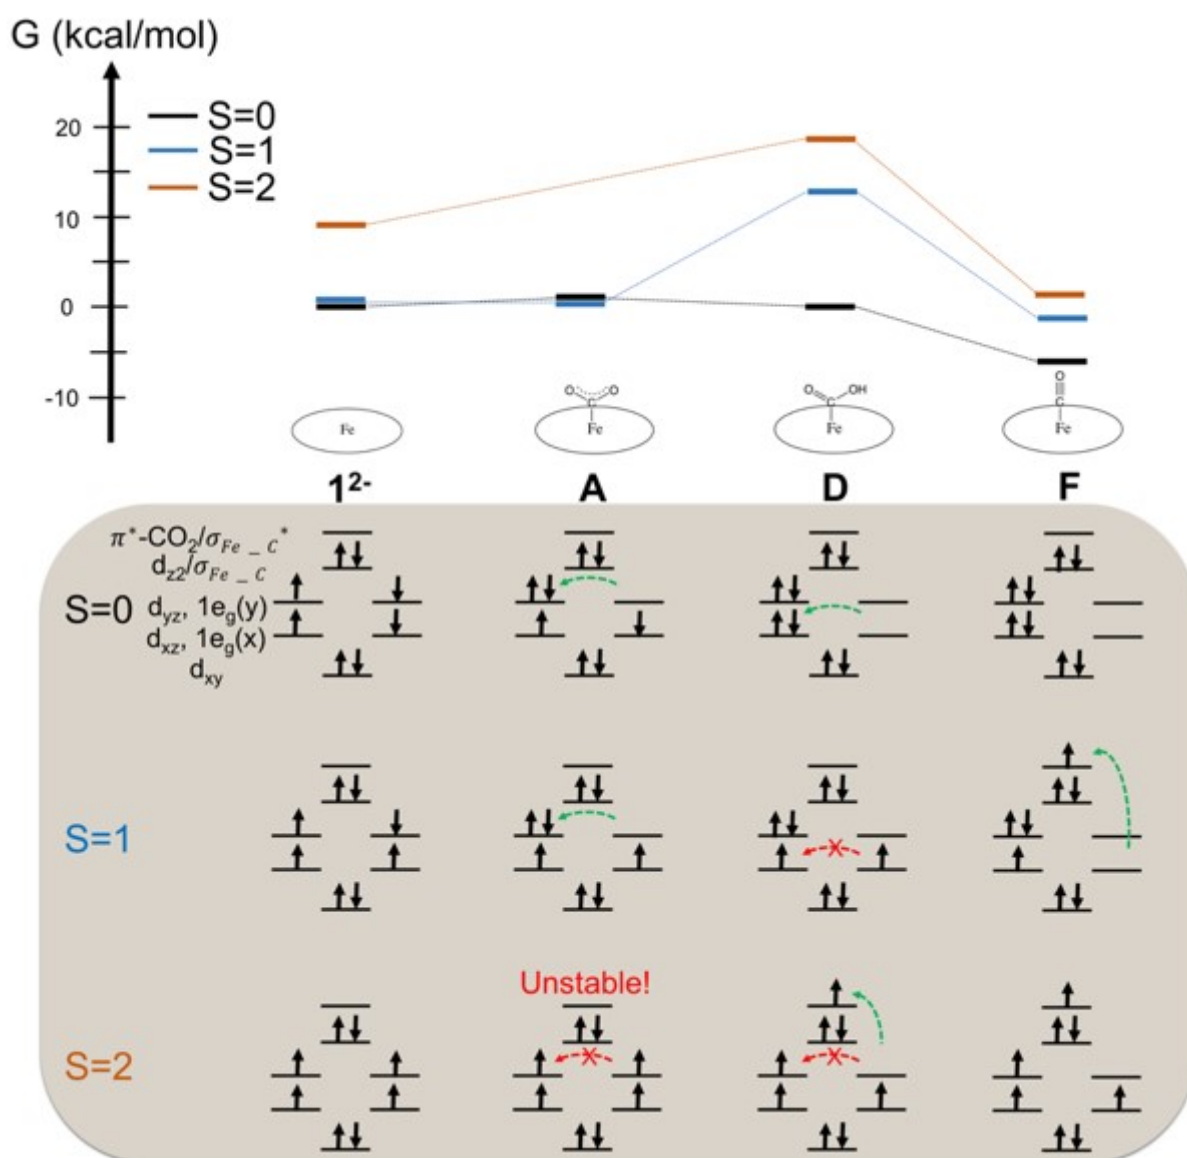

**Figure S5:** (Top) Energy of key intermediates in the singlet (black), triplet (blue) and quintet (brown) free energy landscape for the pathway II. Each line corresponds to the energy of the intermediate schematized below the diagram, i.e.  $12^-$ , A, D and F from left to right. (Bottom) Schematic representation of the electronic structure of the system (d-shell of iron, redox-active orbitals of the TPP ligand, bonding ( $\sigma_{\text{Fe-C}}$ ) and antibonding ( $\sigma_{\text{Fe-C}}^*$ ) combination of the Fe- $d_{22}$  and  $\text{CO}_2-\pi^*$  orbitals) in the intermediates  $12^-$ , A, D and F. Each row corresponds to the overall

spin state of the intermediates, i.e.  $S=0$  (top row),  $S=1$  (intermediate row) or  $S=2$  (bottom row). Of note, in  $1^{2-}$ , the Fe- $d_{z^2}$  and  $\text{CO}_2\text{-}\pi^*$  orbitals do not overlap, hence  $\sigma_{\text{Fe-C}}$  and  $\sigma_{\text{Fe-C}}^*$  correspond to Fe  $d_{z^2}$  and  $\text{CO}_2 \pi^*$ , respectively. Green dashed arrows represent spin-allowed electron transfers, and red dashed arrows represent spin-forbidden electron transfers. For the electronic structure of the intermediate  $5\text{A}$ , the mention “Unstable” accounts for the fact that the adduct dissociates spontaneously into  $51^{2-}$  and  $\text{CO}_2$ .

## b) HER/HCOOH formation

As specified in the main text, the most widely accepted mechanism for both hydrogen evolution and formic acid generation with mononuclear transition metals start with the protonation of the metal center. In the case of  $1^{2-}$ , this step (yielding the metal-hydride  $1\text{M}$ ) is significantly endergonic ( $\Delta G = +8.6$  kcal/mol), and admits a rather large kinetic barrier ( $1\text{TS6}$ , ( $\Delta G^\ddagger = +19.1$  kcal/mol) (Figure S6). Following this step, the reaction may proceed either towards HER or HCOOH formation. The formation of dihydrogen involves the attack of the metal-hydride  $1\text{M}$  on a second proton to form  $3\text{1}$  and release dihydrogen. This step is highly exergonic ( $\Delta G = -18.7$  kcal/mol), both because of a favorable enthalpy variation, and a favorable entropic effect due to the release of the  $\text{H}_2$  molecule. Alternatively, in the mechanism of formic acid generation a  $\text{CO}_2$  molecule inserts into the Fe-H bond of  $1\text{M}$  to form a Fe-OCHO adduct  $5\text{N}$ . Our calculation show that this step is extremely favorable ( $\Delta G = -33.1$  kcal/mol) despite an unfavorable entropy variation following the association of  $\text{CO}_2$  and  $1\text{M}$ . An alternative pathway for HCOOH generation involves the direct interaction between the reduced metal and  $\text{CO}_2$  to form an Fe-OCO adduct, followed by the protonation of the exposed carbon to form  $5\text{N}$ . However, we could not find a stable geometry for the Fe-OCO adduct, which dissociates upon geometry optimization into  $[\text{Fe}(\text{TPP})]^{2-}$  and  $\text{CO}_2$ , showing this alternative pathway is not a viable source.

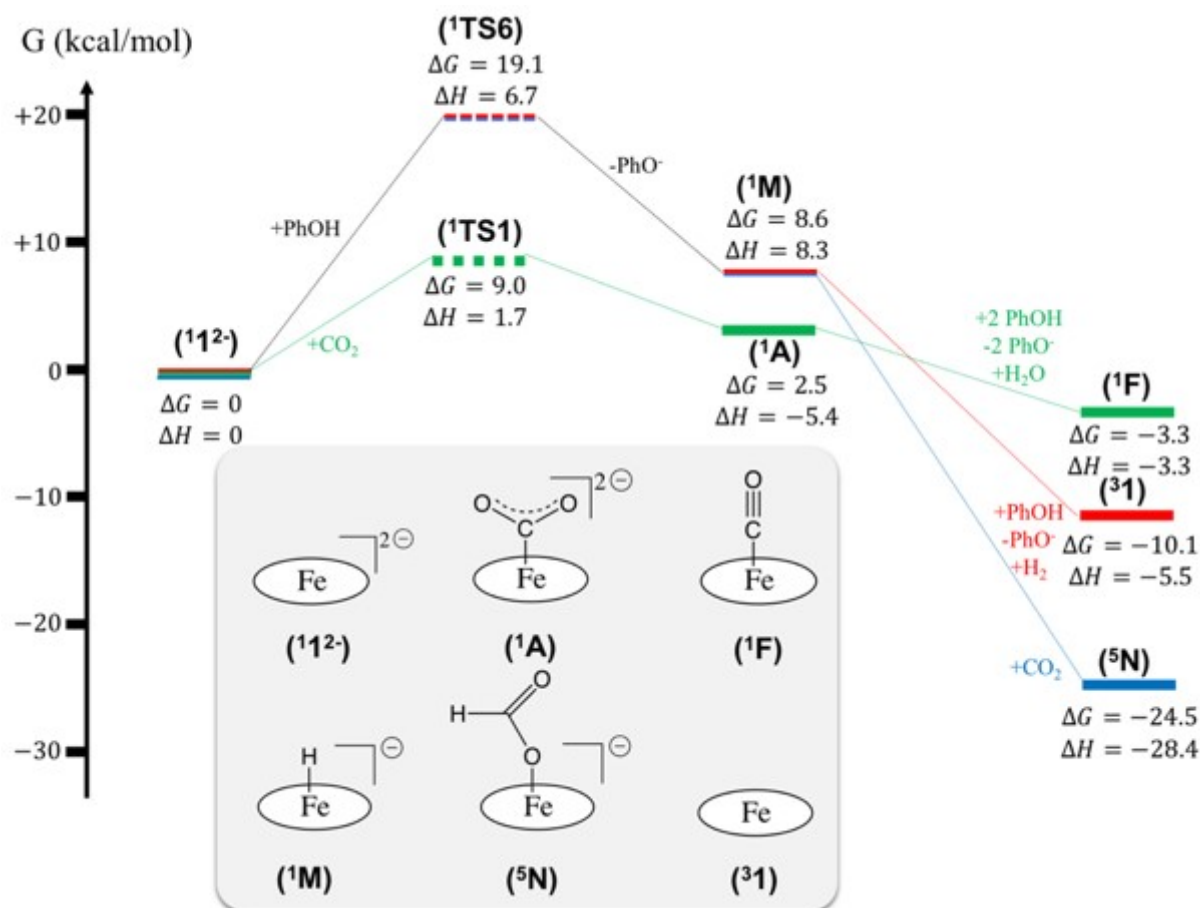

**Figure S6:** Free energy landscape of key-intermediates and transition states involved in the CO<sub>2</sub>-to-CO conversion reaction (pathway II, green lines), hydrogen evolution (red lines) and HCOOH generation (blue lines). Intermediates are displayed in solid lines and transition states are displayed in dashed lines. The Gibbs free energy variation and the gas-phase enthalpy variation both defined in Eq. 1 (Main Text) are displayed below each intermediate. The schematic representation of each intermediate is shown below the free energy surface.

The experimental selectivity of the reaction for CO generation over HCOOH and H<sub>2</sub> generation thus mainly originates from kinetic reasons. In fact, the driving force of the two latter reactions are significantly higher than that of CO generation. However, we found that the formation of the metal-hydride admits an impossibly large barrier ( $\Delta G^\ddagger = +19.1$  kcal/mol), which prevents the formation of this key-intermediate. By comparison, the highest predicted barrier for CO generation is only  $\Delta G^\ddagger = +9.4$  kcal/mol. Hence, our calculations predict the formation of HCOOH and H<sub>2</sub> is prohibited mainly for kinetic reason, due to the impossibly high-lying transition state associated with the formation of the metal-hydride adduct. A similar



result was found by Zhang and al. for a related iron-porphyrin system<sup>14</sup> and by Keith and al. for [Re(bpy)(CO)<sub>3</sub>].<sup>15</sup>

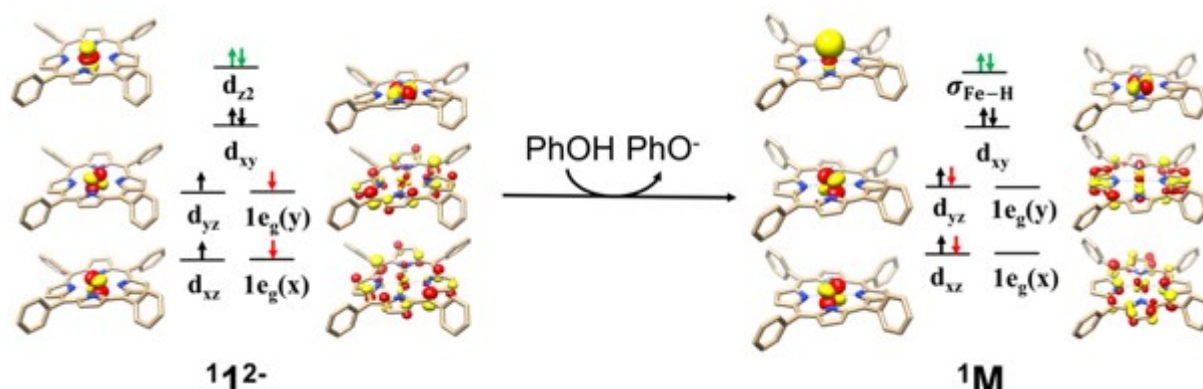

**Figure S7:** Electronic structure of the intermediates  $^1\mathbf{1}^{2-}$  and  $^1\mathbf{M}$ . Green arrows represent electrons transferred from the metal to the proton during the formation of  $^1\mathbf{M}$ , and red arrows represent electrons transferred from the ligand to the metal.

#### 4) Calculation of the turnover frequency for $^1\mathbf{1}^{2-}$

We present here the method used to reproduce the apparent constant experimentally derived by Costentin et. Al.,<sup>11</sup> which can then be used to determine the intrinsic turnover frequency of the system.

In the following treatment, we consider as one elementary step two potential energy surface minima separated by a transition state. This simplifies Pathway I to the following reaction sequence:

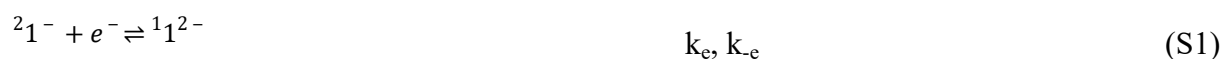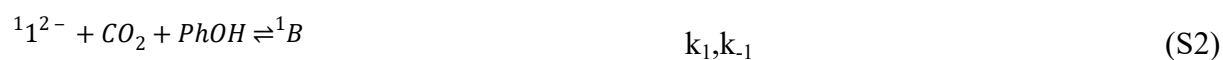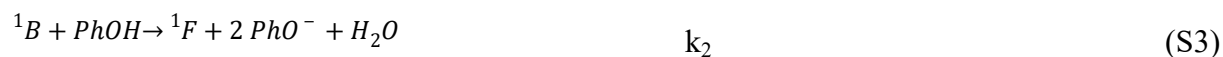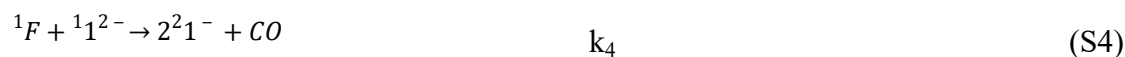

To fit the situation described by Costentin for electrochemical homogeneous catalysis,<sup>11</sup> it is assumed that reaction (S3) and (S4) are irreversible, and that the reaction cycle is in a steady-state regime, the latter being often assumed in catalysis.<sup>16,17</sup> Under these conditions, the apparent rate constant of the reaction sequence (S2-S3) is directly related to the turnover frequency by the following relationship:<sup>11</sup>

$$TOF = \frac{k_{ap}[CO_2]}{1 + e^{\frac{F}{k_B T}[E - E^0]}} \quad (S5)$$

Where  $k_{ap}$  is the apparent constant of the reaction, F the Faraday constant,  $k_B$  the Boltzmann constant and T is the temperature. E is the potential, and  $E^0$  is the standard potential of the couple  ${}^2\mathbf{1}^-/{}^1\mathbf{1}^{2-}$ .

To derive the apparent constant, we make use of the steady-state regime to derive the useful relationship:

$$\frac{d[{}^1B]}{dt} = 0 \quad (S6)$$

From S6, it follows:

$$k_{ap} = \frac{k_1 k_2 [PhOH]^2}{k_2 [PhOH] + k_{-1}} \quad (S7)$$

The apparent constant of the reaction can then be calculated at three different phenol concentrations ([PhOH]=0.1 M, 0.75 M and 3 M), using Eyring's law for the calculation of kinetic constants. Following the calculated energy landscape summarized in Figure 1 (Main Text):

$$k_1 = \frac{h}{k_B T} e^{-\frac{9.0 \text{ kcal/mol}}{k_B T}} \quad (S8)$$

$$k_{-1} = \frac{h}{k_B T} e^{-\frac{13.3 \text{ kcal/mol}}{k_B T}} \quad (S9)$$

$$k_2 = \frac{h}{k_B T} e^{-\frac{17.3 \text{ kcal/mol}}{k_B T}} \quad (S10)$$

For three concentrations of phenol ([PhOH]=0.1 M, 0.75 M and 3 M), we obtain  $k_{ap} = 18.7 \text{ s}^{-1} \cdot \text{M}^{-1}$ ,  $1.0 \times 10^3 \text{ s}^{-1} \cdot \text{M}^{-1}$ , and  $1.7 \times 10^4 \text{ s}^{-1} \cdot \text{M}^{-1}$ . Maximum turnover frequencies may be obtained from Eq. S6 ( $|E| \gg |E^0|$ ) for a  $CO_2$  concentration of 0.23 mol/L,<sup>11</sup> we obtain  $TOF_{max} = 4.3 \text{ s}^{-1}$ ,  $2.4 \times 10^2 \text{ s}^{-1}$  and  $3.9 \times 10^3 \text{ s}^{-1}$ .

Likewise, the turnover frequencies can be estimated for Pathway II. This time the sequence corresponds to:

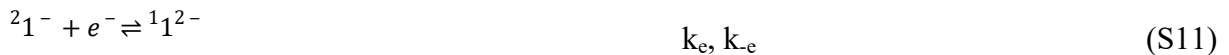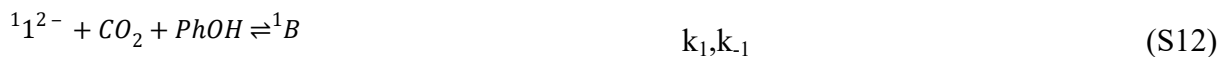

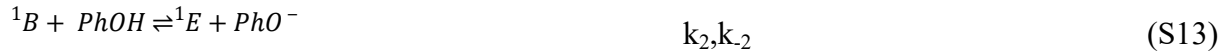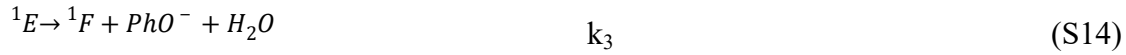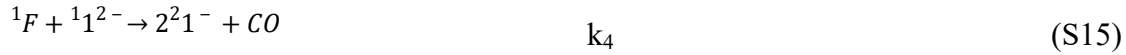

To fit the situation described by Costentin for electrochemical homogeneous catalysis, it is assumed that reaction (S14) and (S15) are irreversible, and that the reaction cycle is in a steady-state regime.

To derive the apparent constant, we make use of the steady-state regime of the reaction to derive the following useful relationships:

$$\frac{d[{}^1E]}{dt} = 0 \quad (S16)$$

$$\frac{d[{}^1B]}{dt} = 0 \quad (S17)$$

From (S16) and (S17), it follows:

$$[{}^1B] = \frac{k_1[{}^11^{2-}][CO_2][PhOH]}{k_2[PhOH] + k_{-1} - \frac{k_{-2}k_2[PhOH][PhO^-]}{k_3 + k_{-2}[PhOH]}}$$

(S18)

$$[{}^1E] = \frac{k_2k_1[{}^11^{2-}][CO_2][PhOH]^2}{\left(k_2[PhOH] + k_{-1} - \frac{k_{-2}k_2[PhOH][PhO^-]}{k_3 + k_{-2}[PhOH]}\right)(k_3 + k_{-2}[PhO^-])}$$

(S19)

Finally, the reaction rate can be written as:

$$v = k_3[{}^1E] = \frac{k_3k_2k_1[{}^11^{2-}][CO_2][PhOH]^2}{\left(k_2[PhOH] + k_{-1} - \frac{k_{-2}k_2[PhOH][PhO^-]}{k_3 + k_{-2}[PhOH]}\right)(k_3 + k_{-2}[PhO^-])}$$

(S20)

By identification, the apparent constant as defined by Costentin et. al.<sup>1,11</sup> is:

$$k_{ap} = \frac{k_3k_2k_1[PhOH]^2}{\left(k_2[PhOH] + k_{-1} - \frac{k_{-2}k_2[PhOH][PhO^-]}{k_3 + k_{-2}[PhOH]}\right)(k_3 + k_{-2}[PhO^-])}$$

(S21)

The apparent constant of the reaction can then be calculated at three different phenol concentrations ([PhOH]=0.1 M, 0.75 M and 3 M), using Eyring's law for the calculation of

kinetic constants and assuming  $[PhO^-] \sim 0$ . Following the calculated energy landscape summarized in Figure 1 (Main Text):

$$k_1 = \frac{h}{k_B T} e^{-\frac{9.0 \text{ kcal/mol}}{k_B T}} \quad (\text{S22})$$

$$k_{-1} = \frac{h}{k_B T} e^{-\frac{13.3 \text{ kcal/mol}}{k_B T}} \quad (\text{S23})$$

$$k_2 = \frac{h}{k_B T} e^{-\frac{9.4 \text{ kcal/mol}}{k_B T}} \quad (\text{S24})$$

$$k_{-2} = \frac{h}{k_B T} e^{-\frac{5.7 \text{ kcal/mol}}{k_B T}} \quad (\text{S25})$$

$$k_3 = \frac{h}{k_B T} e^{-\frac{8.0 \text{ kcal/mol}}{k_B T}} \quad (\text{S26})$$

For three concentrations of phenol ( $[PhOH]=0.1 \text{ M}$ ,  $0.75 \text{ M}$  and  $3 \text{ M}$ ), we obtain  $k_{ap}=1.6 \times 10^5 \text{ s}^{-1} \cdot \text{M}^{-1}$ ,  $1.2 \times 10^6 \text{ s}^{-1} \cdot \text{M}^{-1}$  and  $4.8 \times 10^6 \text{ s}^{-1} \cdot \text{M}^{-1}$ . Maximum turnover frequencies may be obtained from Eq. S6 ( $|E| \gg |E^0|$ ) for a  $CO_2$  concentration of  $0.23 \text{ mol/L}$ ,<sup>11</sup> we obtain  $TOF_{max}=3.6 \times 10^4 \text{ s}^{-1}$ ,  $2.76 \times 10^5 \text{ s}^{-1}$  and  $1.10 \times 10^6 \text{ s}^{-1}$ , a remarkable agreement with the experimentally-resolved values of  $1.8 \times 10^3 \text{ s}^{-1}$ ,  $1.5 \times 10^4 \text{ s}^{-1}$  and  $1 \times 10^5 \text{ s}^{-1}$ .<sup>11</sup>

## 5) Electronic structure of the additional intermediates

### a) The transition states electronic structures

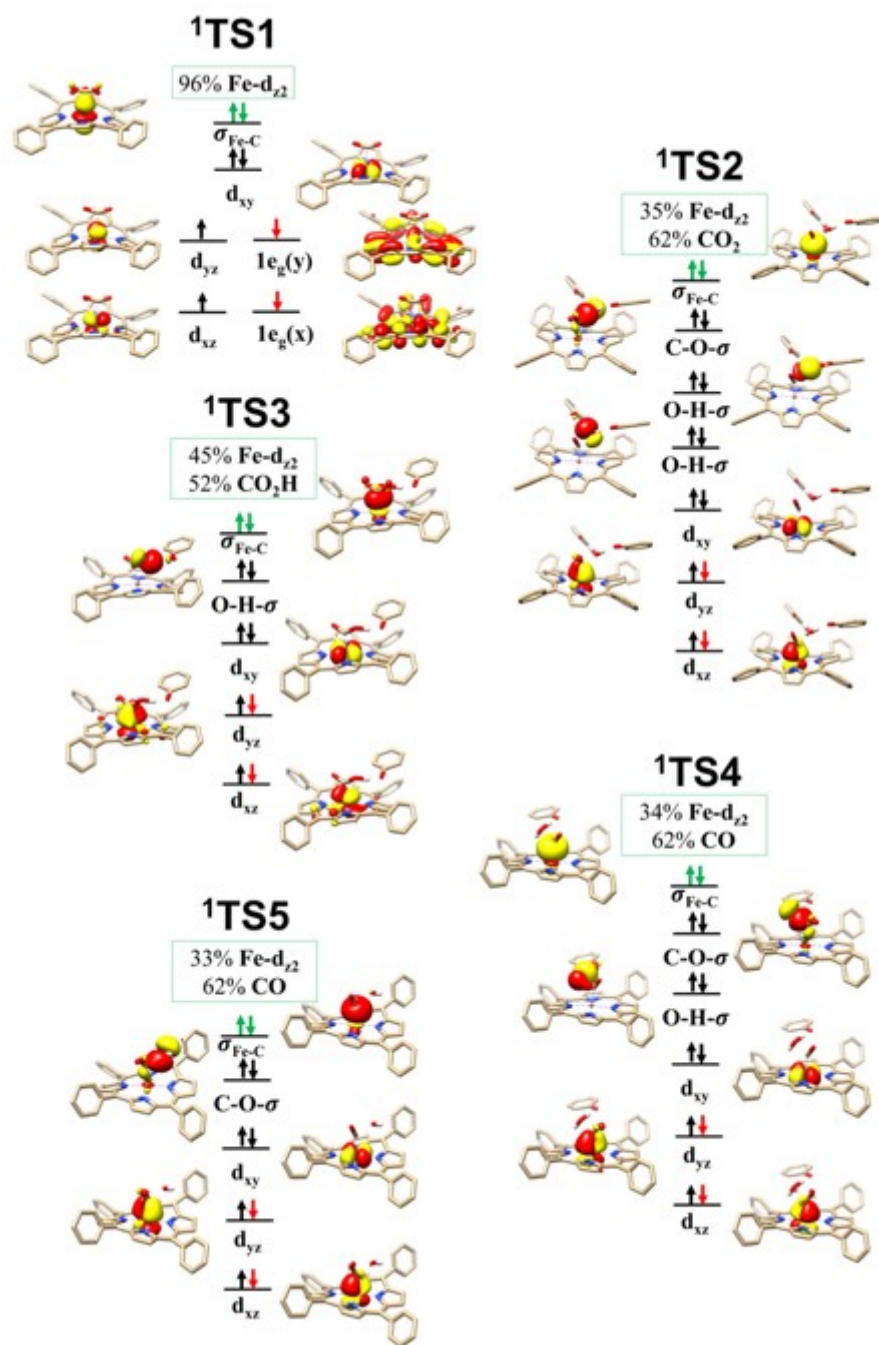

**Figure S8:** Electronic structure of the transition states  ${}^1\text{TS1}$ ,  ${}^1\text{TS2}$ ,  ${}^1\text{TS3}$ ,  ${}^1\text{TS4}$  and  ${}^1\text{TS5}$  defined in the Main text and in Figure S3. Electrons involved in the TPP-to-Fe electron transfers are represented by red arrows. Electrons involved in the metal-to- $\text{CO}_2$  are shown by green arrows. The Fe and  $\text{CO}_2/\text{CO}_2\text{H}/\text{CO}$  Löwdin population of the  $\sigma_{\text{Fe-C}}$  bonding orbital is displayed circled in green. Carbons are displayed in beige, oxygen in red and iron in orange. For clarity, all hydrogens are hidden except the hydrogen of the  $\text{CO}_2\text{H}$  moiety and the hydrogen of the phenols in the process of being transferred to the reaction catalyst.

b) Intermediates in the reduction of  $\text{CO}_2$  catalyzed with  $[\text{Fe}(\text{qpy})]^+$

**Table S3:** Electronic energy difference (in kcal/mol) between the spin states of each intermediate involved in the mechanism of CO<sub>2</sub> reduction catalysed with [Fe(qpy)]<sup>+</sup>. For each line, the energy is given relative to the lowest-lying spin state of the intermediate. Notably, the mention “dissociates” signals that the intermediate [Fe(qpy)(CO<sub>2</sub>)]<sup>+</sup> spontaneously dissociates into [Fe(qpy)]<sup>+</sup> and CO<sub>2</sub> upon geometry optimization.

| Intermediate                              | Low-spin  | Intermediate spin   | High spin           |
|-------------------------------------------|-----------|---------------------|---------------------|
| [Fe(qpy)] <sup>+</sup>                    | 0 (S=1/2) | 19.1(S=3/2)         | 6.8 (S=5/2)         |
| [Fe(qpy)(CO <sub>2</sub> )] <sup>+</sup>  | 0 (S=1/2) | Dissociates (S=3/2) | Dissociates (S=5/2) |
| [Fe(qpy)(CO <sub>2</sub> )]               | 0 (S=0)   | 3.1 (S=1)           | 4.6 (S=2)           |
| [Fe(qpy)(CO <sub>2</sub> H)] <sup>+</sup> | 0 (S=0)   | 6.2 (S=1)           | 1.6 (S=2)           |
| [Fe(qpy)(CO)] <sup>2+</sup>               | 0(S=0)    | 4.0 (S=1)           | <1                  |

The active species, [Fe(qpy)]<sup>+</sup>, features a distorted square-planar environment. It is best described as a Fe<sup>II</sup> center (S<sub>Fe</sub>=1) antiferromagnetically coupled to a qpy<sup>•-</sup> ligand (S<sub>qpy</sub>=1/2). In details, the Fe center features a configuration (d<sub>xy</sub>)<sup>2</sup>(d<sub>xz</sub>)<sup>1</sup>(d<sub>yz</sub>)<sup>1</sup>(d<sub>z2</sub>)<sup>2</sup>, one β-electron populates the primarily ligand-based 1π\* orbital, which is an admixture of the ligand-centered π<sub>qpy</sub>\* and Fe d<sub>yz</sub> atomic orbital. Consequently the orbitals Fe d<sub>yz</sub> and 1π\* form a spin-coupled pair. In the next step, the doubly-occupied Fe d<sub>z2</sub> donates electrons to the unoccupied in-plane CO<sub>2</sub> π<sub>ip</sub>\* orbital. The resulting bonding orbital (σ<sub>Fe-C</sub>) remains mainly centered around Fe (81% Fe, 16% CO<sub>2</sub>). Hence the system is best described as a Fe<sup>I</sup> center (S<sub>Fe</sub>=1/2) bound to a neutral CO<sub>2</sub> ligand. Interestingly, the intramolecular electron transfer connects the π<sub>qpy</sub>\* to the Fe d<sub>xz</sub> orbital rather than the Fe d<sub>yz</sub>, even though in [Fe(qpy)]<sup>+</sup>, the π<sub>qpy</sub>\* is mixed with the Fe d<sub>yz</sub>. In fact, concomitantly with the intramolecular electron transfer from 1π\* to Fe d<sub>yz</sub>, a promotion from the Fe d<sub>yz</sub> to the Fe d<sub>xz</sub> is triggered because of the interelectronic repulsion between the electrons in the Fe d<sub>yz</sub> orbital and those of the C-O bond. Hence, in total, the electron is transferred from the π<sub>qpy</sub>\* to the Fe d<sub>xz</sub>, even though these orbitals do not mix. In the subsequent step, an electron is transferred from the electrode to the now vacant 1π\* orbital. The reduction takes place on the ligand, hence the polarity of the Fe-C<sub>CO2</sub> bond is only marginally affected and the weight of Fe d<sub>z2</sub> orbital in the σ<sub>Fe-C</sub> orbital remains predominant (70%). Hence the system is best described as a Fe<sup>I</sup> center (S<sub>Fe</sub>=1/2) antiferromagnetically-coupled with a radical quaterpyridine ligand (S<sub>qpy</sub>=1/2) and bound to an approximately neutral CO<sub>2</sub> ligand. The subsequent step is the protonation of the CO<sub>2</sub> moiety affording the metallacarboxylic acid intermediate, which triggers

a significant change in the electronic structure. The Fe-C<sub>CO2</sub> bond becomes more covalent, as indicated by the weight of Fe in the  $\sigma_{\text{Fe-C}}$  orbital (40% Fe, 56% CO<sub>2</sub>H). Hence this step can be interpreted as a concerted proton electron transfer (CPET) to the CO<sub>2</sub>. Meanwhile, a second electron transfer from the  $\pi_{\text{qpy}}^*$  orbital to the Fe d<sub>yz</sub> compensates the loss of electronic density due to the metal-to-CO<sub>2</sub> transfer. The complex has to be described as a resonant form between a singlet Fe<sup>0</sup> bound to a (CO<sub>2</sub>H)<sup>+</sup> ligand and a singlet Fe<sup>II</sup> bound to a (CO<sub>2</sub>H)<sup>-</sup> ligand, bound to a charge neutral quaterpyridine ligand. In total, this step thus corresponds to the transfer of one electron from the metal to the CO<sub>2</sub> ligand, and one electron from the quaterpyridine ligand to the metal center. The next step corresponds to the C-O bond cleavage and yields a metal-carbonyl. The  $\sigma_{\text{Fe-CO}}$  bonding orbital is mainly centered around the CO (35% Fe, 61% CO), hence the system is best described as a Fe<sup>II</sup> center (S<sub>Fe</sub>=0) bound to a carbonyl ligand (and a neutral quaterpyridine).

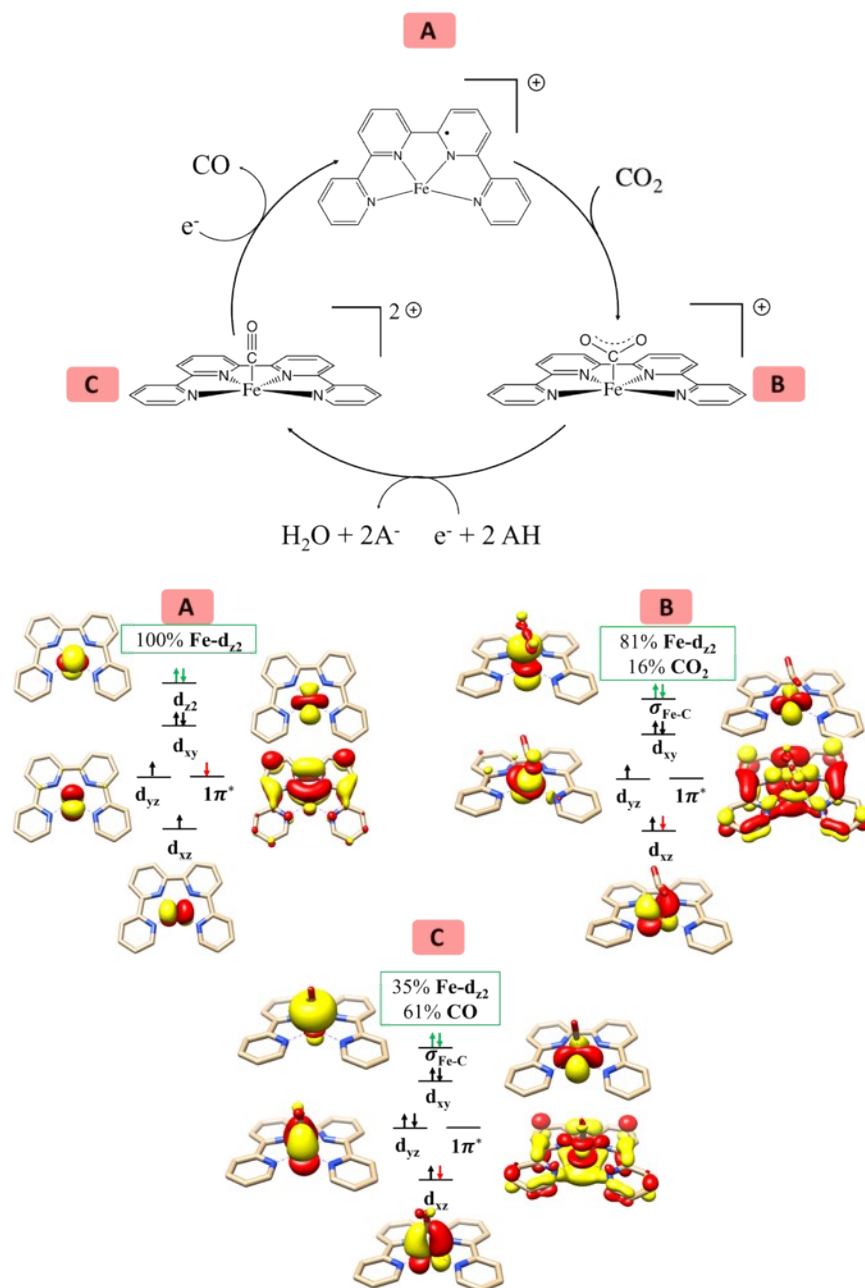

**Figure S9:** (Top) catalytic cycle of CO<sub>2</sub>-to-CO conversion catalysed with [Fe(qpy)]<sup>+</sup>. The mechanism is one compatible with ref. 10. (Bottom) associated electronic structure of the intermediates [Fe(qpy)]<sup>+</sup> (A), [Fe(qpy)(CO<sub>2</sub>)]<sup>+</sup> (B), [Fe(qpy)(CO<sub>2</sub>)] (C), [Fe(qpy)(CO<sub>2</sub>H)]<sup>+</sup> (D) and [Fe(qpy)(CO)]<sup>2+</sup> (E). Electrons involved in the ligand-to-metal intramolecular transfer are shown by red arrows. Electrons involved in the metal-to-CO<sub>2</sub> intramolecular transfer are shown by green arrows. The Fe and CO<sub>2</sub>/CO<sub>2</sub>H/CO Löwdin population of the  $\sigma_{\text{Fe-C}}$  bonding orbital is displayed circled in green. Carbons are displayed in beige, oxygen in red and iron in orange. For clarity, all hydrogens are hidden.

c) Intermediates in the reduction of CO<sub>2</sub> catalyzed with [Fe(bpy)<sup>NHEt</sup>PY2Me]



**Table S4:** Electronic energy difference (in kcal/mol) between the spin states of each intermediate involved in the mechanism of CO<sub>2</sub> reduction catalysed with [Fe(bpy<sup>NHEt</sup>PY2Me)]. For each line, the energy is given relative to the lowest-lying spin state of the intermediate.

|                                                                 | S=0   | S=1 | S=2   |
|-----------------------------------------------------------------|-------|-----|-------|
| [Fe(bpy <sup>NHEt</sup> PY2Me)]                                 | +23.5 | 0   | +5.8  |
| [Fe(bpy <sup>NHEt</sup> PY2Me)(CO <sub>2</sub> )]               | +9.7  | 0   | +6.7  |
| [Fe(bpy <sup>NHEt</sup> PY2Me)(CO <sub>2</sub> H)] <sup>+</sup> | +5.9  | 0   | +5.9  |
| [Fe(bpy <sup>NHEt</sup> PY2Me)(CO)] <sup>2+</sup>               | +5.1  | 0   | +21.4 |

The active species [Fe(bpy<sup>NHEt</sup>PY2Me)] corresponds to a Fe<sup>II</sup> center ( $S_{Fe}=2$ ) antiferromagnetically coupled to a diradical bpy<sup>NHEt</sup>PY2Me<sup>••2-</sup> ligand ( $S_{bpy^{NHEt}PY2Me}=1$ ). In details, the Fe features the electronic configuration  $(d_{xy})^1(d_{xz})^2(d_{yz})^1(d_{z2})^1(d_{x2-y2})^1$ , and two  $\beta$ -electrons populate the  $1\pi^*$  and  $2\pi^*$ . The former is an admixture of the PY2Me  $\pi_{PY2Me}^*$  and Fe  $d_{xy}$  fragment orbitals, while the latter is an admixture of bpy  $\pi_{bpy}^*$  and Fe  $d_{yz}$  fragment orbitals. Consequently,  $1\pi^*$ ,  $2\pi^*$ , Fe  $d_{xy}$  and Fe  $d_{yz}$  form two spin-coupled pairs. Of note, the Fe  $d_{z2}$  orbital is singly-occupied. However, the approach of the CO<sub>2</sub> molecule triggers a substantial electronic reorganization which can be summarized as follow: (1) the approach of CO<sub>2</sub> triggers the  $\pi_{PY2Me}^*$ -to- $d_{xy}$  electron transfer, (2) the energy of the  $\sigma_{Fe-C}$  is lowered due to the mixing of the Fe- $d_{z2}$  atomic orbital with the CO<sub>2</sub>  $\pi_{ip}^*$  orbital, triggering a  $d_{xy}$ -to- $\sigma_{Fe-C}$  electron transfer. The  $\sigma_{Fe-C}$  orbital is therefore doubly-occupied with a strong Fe character (74% Fe, 22% CO<sub>2</sub>). Hence, the system is best described as a Fe<sup>I</sup> center ( $S_{Fe}=3/2$ ) antiferromagnetically-coupled with a bpy<sup>NHEt</sup>PY2Me<sup>•-</sup> ligand ( $S_{bpy^{NHEt}PY2Me}=1/2$ ). In terms of electronic transfers, the step corresponds to an electron transfer from the ligand to the metal. The subsequent protonation of the adduct changes drastically the polarity of the bonding orbital  $\sigma_{Fe-C}$  orbital (35% Fe, 65% CO<sub>2</sub>H). Furthermore, an electron is transferred from the ligand  $\pi_{bpy}^*$  to the Fe  $d_{yz}$  orbital. Hence, this species is best described as a Fe<sup>II</sup> ( $S_{Fe}=1$ ) metal center bound to a (CO<sub>2</sub>H)<sup>-</sup> ligand. This step corresponds to a two-electron transfer from the metal to the CO<sub>2</sub>, coupled with a one-electron transfer from the ligand to the metal. Finally, the proton-assisted cleavage of the C-O bond yields a metal-carbonyl adduct in which the bonding  $\sigma_{Fe-C}$  is clearly CO-centered (29% Fe, 67% CO). This species is unambiguously described as a Fe<sup>II</sup> ( $S_{Fe}=1$ ) metal center bound to a carbonyl ligand.

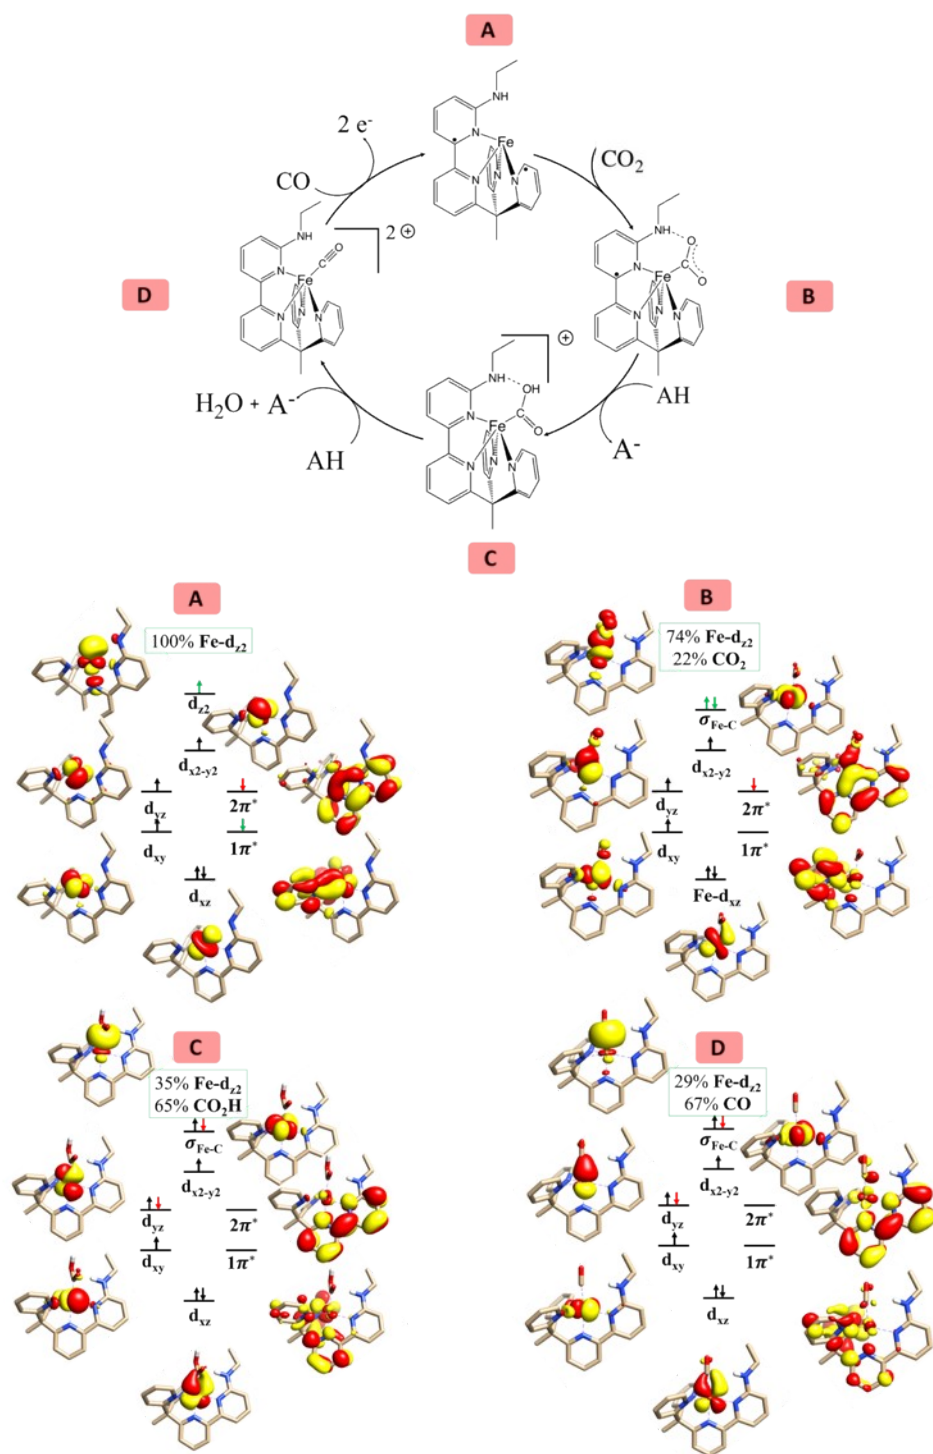

**Figure S10:** (Top) catalytic cycle of  $\text{CO}_2$ -to- $\text{CO}$  conversion catalysed with  $[\text{Fe}(\text{bpy}^{\text{NHEt}^t}\text{PY2Me})]$ . The mechanism is taken from ref. 18. However, different from the results of the authors, we found that the catalytic system remains in a triplet state for all investigated intermediates (Table S4). (Bottom) associated electronic structure of the intermediates  $[\text{Fe}(\text{bpy}^{\text{NHEt}^t}\text{PY2Me})]$  (A),  $[\text{Fe}(\text{bpy}^{\text{NHEt}^t}\text{PY2Me})(\text{CO}_2)]$  (B),  $[\text{Fe}(\text{bpy}^{\text{NHEt}^t}\text{PY2Me})(\text{CO}_2\text{H})]^+$  (C),

and  $[\text{Fe}(\text{bpy}^{\text{NHEt}}\text{PY2Me})(\text{CO})]^{2+}$  (D). Electrons involved in the ligand-to-metal intramolecular transfer are shown by red arrows. Electrons involved in the metal-to- $\text{CO}_2$  intramolecular transfer are shown by green arrows. The Fe and  $\text{CO}_2/\text{CO}_2\text{H}/\text{CO}$  Löwdin population of the  $\sigma_{\text{Fe-C}}$  bonding orbital is displayed circled in green. Carbons are displayed in beige, oxygen in red and iron in orange. For clarity, all hydrogens are hidden except the hydrogen of the  $\text{CO}_2\text{H}$  motif and the hydrogens participating to the intramolecular hydrogen bond.

d) Intermediates in the reduction of  $\text{CO}_2$  catalyzed with  $[\text{Co}(\text{qpy})]$

**Table S5:** Electronic energy difference (in kcal/mol) between the spin states of each intermediate involved in the mechanism of  $\text{CO}_2$  reduction catalysed with  $[\text{Co}(\text{qpy})]$ . For each line, the energy is given relative to the lowest-lying spin state of the intermediate. Notably, the mention “dissociates” signals that the intermediate  $[\text{Co}(\text{qpy})(\text{CO}_2)]$  spontaneously dissociates into  $[\text{Co}(\text{qpy})]$  and  $\text{CO}_2$  upon geometry optimization

|                                                  | S=1/2       | S=3/2 | S=5/2       |
|--------------------------------------------------|-------------|-------|-------------|
| $[\text{Co}(\text{qpy})]$                        | 0           | +8.4  | +20.9       |
| $[\text{Co}(\text{qpy})(\text{CO}_2)]$           | Dissociates | 0     | Dissociates |
| $[\text{Co}(\text{qpy})(\text{CO}_2\text{H})]^+$ | 0           | +6.7  | +45.7       |
| $[\text{Co}(\text{qpy})(\text{CO})]^{2+}$        | 0           | +6.5  | +70.5       |

This mechanism is highly similar to that of  $[\text{Co}(\text{N}_4\text{H})]$ . In the active species  $[\text{Co}(\text{qpy})]$ , the cobalt has a distorted square-planar environment. It is best described as a Co(II) ( $S_{\text{Co}}=1/2$ ) center antiferromagnetically coupled with a  $\text{qpy}^{2-}$  diradical dianion ( $S_{\text{qpy}}=1$ ). In details, the Co center features a  $(d_{xy})^2(d_{xz})^1(d_{yz})^2(d_{z2})^2$  and two electrons populate the primarily ligand-based  $1\pi^*$  and  $2\pi^*$  orbitals. Of note, the former is purely ligand-centered, while the latter is an admixture of the fragment orbital  $\pi_{\text{qpy-1}}^*$  and the Co- $d_{xz}$  atomic orbital. Consequently,  $2\pi^*$  and  $d_{xz}$  form a spin-coupled pair leading to an antiferromagnetic spin coupling between the quaterpyridine and the metal center. In the first step, the Co center binds the  $\text{CO}_2$  molecule. However, our calculations showed that the adduct was unstable in a singlet state and spontaneously dissociates into  $[\text{Co}(\text{qpy})]$  and  $\text{CO}_2$ . Arguably, this can be attributed to the weak bond between the cobalt center and  $\text{CO}_2$  motif, and the unfavorable interelectronic repulsion between the doubly-occupied Co  $d_{yz}$  orbital and the electrons of the C-O bond. Indeed, the quartet state, in which one electron of the Co  $d_{yz}$  orbital is promoted to the Co  $d_{x2-y2}$  orbital, is

stable, likely due to the lower interelectronic repulsion between the  $d_{yz}$  and the electrons of the C-O bond. In the quartet intermediate, the Co  $d_{z^2}$  donates electrons to the in-plane  $\text{CO}_2 \pi_{ip}^*$ . The resulting bonding orbital  $\sigma_{\text{Co-C}}$  is strongly Co-centered (82% Co, 18%  $\text{CO}_2$ ). Furthermore, one electron is transferred from the  $\pi_{\text{qpy-1}}^*$  to the  $d_{xz}$  orbital. Consequently, the Cobalt is best described as a  $\text{Co}^{\text{I}}$  center ( $S_{\text{Co}}=1$ ) bound to a  $\text{CO}_2$  and *ferromagnetically* coupled with a  $\text{qpy}^{\cdot-}$  ligand ( $S_{\text{qpy}}=1/2$ ). Thus, in terms of electron transfer the step is only accompanied by one electron transfer from the ligand to the metal. The subsequent protonation of the adduct yielding the metallacarboxylic acid intermediate triggers a significant electronic reorganization. Indeed, the  $\sigma_{\text{Co-C}}$  bonding orbital is strongly covalent (58% Co, 42%  $\text{CO}_2\text{H}$ ). Furthermore, the doublet state is significantly more stable than the quartet, hence the electron populating the  $d_{x^2-y^2}$  is promoted back to the  $d_{yz}$  orbital. Additionally, the singly populated  $1\pi^*$  orbital of this intermediate is a mixture of  $\text{qpy} \pi_{\text{qpy-2}}^*$  fragment orbital and the  $\sigma_{\text{Co-C}}^*$  orbital (53% Co, 39%  $\text{qpy}$ ). In terms of electron transfer, this step corresponds to a one-electron transfer from the cobalt to the  $\text{CO}_2\text{H}$  motif, and a partial electron transfer from the ligand to the cobalt. Finally, the proton-assisted C-O bond cleavage yields a metal-carbonyl adduct. The bonding  $\sigma_{\text{Co-C}}$  orbital is mainly CO-centered (26% Co, 71% CO). Furthermore, the electron previously populating the  $1\pi^*$  has relocated completely to the antibonding  $\sigma_{\text{Co-CO}}^*$ . Hence this species is unambiguously assigned as a  $\text{Co}^{\text{II}}$  center bound to a carbonyl ligand. In terms of electronic transfer, the step corresponds to a one-electron transfer from the cobalt to the CO motif, and the completion of the previously partial electron transfer from the ligand to the cobalt.



green. In the intermediate  $[\text{Co}(\text{qpy})(\text{CO}_2\text{H})]^+$ , the Co and qpy Löwdin population of the  $1\pi^*$  orbital displayed circled in red. Carbons are displayed in beige, oxygen in red and iron in orange. For clarity, all hydrogens are hidden except the hydrogen of the  $\text{CO}_2\text{H}$  motif.

e) Intermediates in the reduction of  $\text{CO}_2$  catalyzed with  $[\text{Co}(\text{L})]$

**Table S6:** Electronic energy difference (in kcal/mol) between the spin states of each intermediate involved in the mechanism of  $\text{CO}_2$  reduction catalysed with  $[\text{Co}(\text{L})]$ . For each line, the energy is given relative to the lowest-lying spin state of the intermediate.

|                                                | S=1/2 | S=3/2 | S=5/2 |
|------------------------------------------------|-------|-------|-------|
| $[\text{Co}(\text{L})]$                        | 0     | +5.8  | +13.3 |
| $[\text{Co}(\text{L})(\text{CO}_2)]$           | 0     | +16.9 | +27.3 |
| $[\text{Co}(\text{L})(\text{CO}_2\text{H})]^+$ | 0     | +1.7  | +43.0 |
| $[\text{Co}(\text{L})(\text{CO})]^{2+}$        | +3.4  | 0     | +57.3 |

The mechanism of  $\text{CO}_2$  reduction catalyzed by  $[\text{Co}(\text{L})]$  is similar to that of  $[\text{Co}(\text{N}_4\text{H})]$ . Like for  $[\text{Co}(\text{N}_4\text{H})]$ , the ligand environment of  $[\text{Co}(\text{L})]$  is best described as a square-planar ligand field, despite the presence of a fifth nitrogen donor weakly interacting with the cobalt. However, instead of being described as a  $\text{Co}^{\text{II}}$  antiferromagnetically coupled to a diradical ligand like  $[\text{Co}(\text{N}_4\text{H})]$ , it is best described as a low-spin  $\text{Co}^{\text{II}}$  ( $S_{\text{Co}}=1/2$ ) bound to a closed shell  $\text{L}^{2-}$  ligand ( $S_{\text{L}}=0$ ). In details, Co features the configuration  $(d_{xy})^2(d_{xz})^2(d_{yz})^1(d_{z^2})^2$  and two electrons populate the  $1a''$  orbital (nomenclature according to the Cs point group). This doubly-populated orbital is an admixture of the ligand-centered fragment orbital  $\pi_{\text{L-a}''}^*$  and the singly-occupied Co  $d_{yz}$  orbital. During the formation of the  $[\text{Co}(\text{L})(\text{CO}_2)]$  intermediate, the Co  $d_{z^2}$  donates electrons to the  $\text{CO}_2$   $\pi_{\text{ip}}^*$ , forming a bonding orbital  $\sigma_{\text{Co-C}}$  mainly centered on Co (61% Co, 35%  $\text{CO}_2$ ). During this step, an electron is transferred from the  $\pi_{\text{L-a}''}^*$  to the  $d_{yz}$  orbital. Concomitantly, the other electron centered on the  $1a''$  orbital is promoted to another unoccupied orbital of the ring  $1a'$ . The  $1a'$  orbital has a different symmetry than that of  $1a''$ , and in fact predominantly corresponds to the ligand-centered  $\pi_{\text{L-a}'}^*$  fragment orbital, slightly mixed with the antibonding  $\sigma_{\text{Co-C}}^*$  orbital. Here, the system is best described as a  $\text{Co}^{\text{I}}$  center ( $S_{\text{Co}}=0$ ) bound to a  $\text{L}^{\cdot-}$  ligand ( $S_{\text{L}}=1/2$ ) and a  $\text{CO}_2$  motif, and the electron transfer events can be summarized as simply an electron transfer from the ligand to the metal. The subsequent protonation of the adduct affording a metallacarboxylic acid intermediate is characterized by a

significant increase in covalence of the  $\sigma_{\text{Co-C}}$  bonding orbital (41% Co, 59%  $\text{CO}_2\text{H}$ ). Concomitantly, the mixing of the  $\pi_{\text{L-a}}^*$  with the  $\sigma_{\text{Co-C}}^*$  orbital increases, such as the 1a' orbital is an equal mixture of both fragment (40% Co, 56% L). Hence, this step likely corresponds to the transfer of the first electron to the  $\text{CO}_2$  moiety, accompanied by a *partial* electronic transfer from the ligand to the metal. Subsequently, the C-O bond scission occurs coupled with a second proton transfer. After this step is complete the  $\sigma_{\text{Co-C}}$  is mainly centered around CO (24% Co, 73% CO). The electron previously populating the  $\pi_{\text{L-a}}^*$  orbital is entirely transferred to the antibonding  $\sigma_{\text{Co-CO}}^*$  orbital. Hence, the oxidation state of this intermediate is clearly identified as a  $\text{Co}^{\text{II}}$  bound to a carbonyl ligand. The step thus corresponds to a second metal-to- $\text{CO}_2$  electron transfer, and the completion of the previously partial electron transfer from the ligand to the metal.

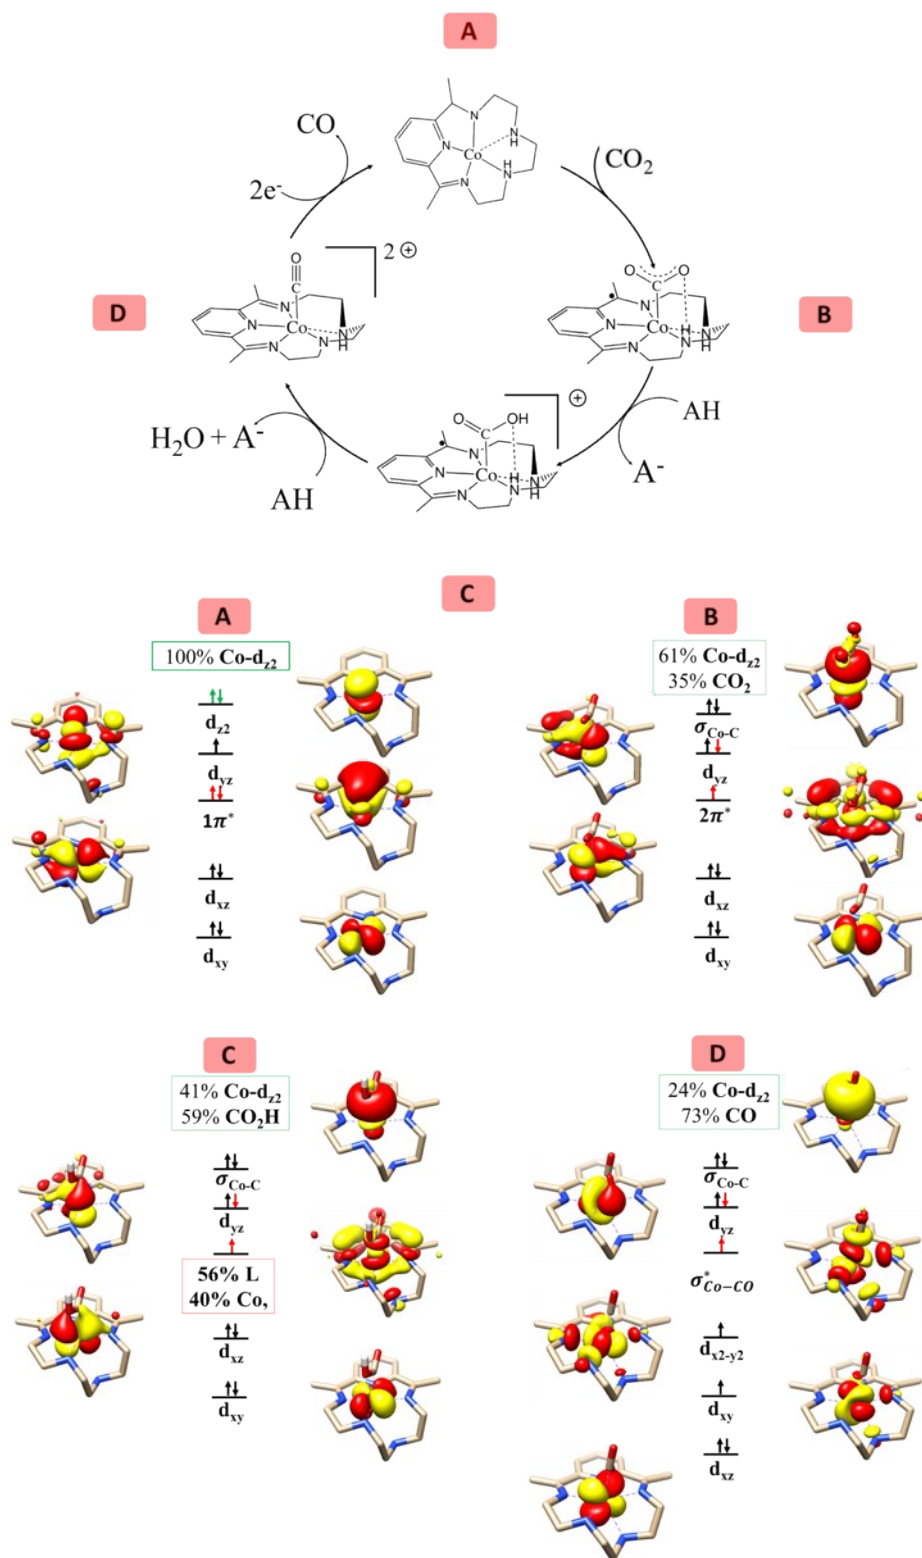

**Figure S12:** (Top) catalytic cycle of  $\text{CO}_2$ -to- $\text{CO}$  conversion catalysed with  $[\text{Co}(\text{L})]$ . The mechanism is taken from the reference 6. On the basis of the system's structural and electronic similarity with  $[\text{Co}(\text{N}_4\text{H})]$ , it is assumed here that both electrons are transferred from the electrode to the complex after the cleavage of the C-O bond. Dashed bonds between the oxygen of the  $\text{CO}_2$  or  $\text{CO}_2\text{H}$  motif and the hydrogen of one amine ligand correspond to hydrogen bonds.



Dashed bond between the nitrogen of the amine ligand and the cobalt center correspond to weak axial interactions. (Bottom) associated electronic structure of the intermediates [Co(L)] (A), [Co(L)(CO<sub>2</sub>)] (B), [Co(L)(CO<sub>2</sub>H)]<sup>+</sup> (C), and [Co(L)(CO)]<sup>2+</sup> (D). Electrons involved in the ligand-to-metal intramolecular transfer are shown by red arrows. Electrons involved in metal-to-CO<sub>2</sub> intramolecular transfer are shown by green arrows. The Co and CO<sub>2</sub>/CO<sub>2</sub>H/CO Löwdin population of the  $\sigma_{\text{Co-C}}$  bonding orbital is displayed circled in green. In the intermediate [Co(L)(CO<sub>2</sub>H)]<sup>+</sup>, the Co and L Löwdin population of the 1a' orbital is displayed circled in red. Carbons are displayed in beige, oxygen in red and iron in orange. For clarity, all hydrogens are hidden except the hydrogen of the CO<sub>2</sub>H motif and the hydrogens participating to the intramolecular hydrogen bonds.

f) Intermediates in the reduction of CO<sub>2</sub> catalyzed with [Mn (bpy)(CO)<sub>3</sub>]K

The mechanism resembles closely that of [Re(bpy)(CO)<sub>3</sub>]K. In the first intermediate [Mn (bpy)(CO)<sub>3</sub>]K, the ligand field is square-pyramidal. The Mn features a configuration (d<sub>xy</sub>)<sup>2</sup>(d<sub>xz</sub>)<sup>2</sup>(d<sub>yz</sub>)<sup>2</sup> and the HOMO 1 $\pi^*$  is an admixture of Mn and  $\pi_{\text{bpy}}^*$  fragment orbitals (24% Mn and 62% bpy). Thus, it is best described as a Mn<sup>I</sup> center (S<sub>Mn</sub>=0) bound to a doubly-reduced bpy<sup>2-</sup> ligand (S<sub>bpy</sub>=0). During the formation of the adduct [Mn(bpy)(CO)<sub>3</sub>(CO<sub>2</sub>)]K, a two-electron transfer from the  $\pi_{\text{bpy}}^*$  orbital to the formally empty Mn d<sub>z<sup>2</sup></sub> orbital takes place, and the latter orbital donates the electron density into the CO<sub>2</sub>  $\pi_{\text{ip}}^*$  orbital. The subsequently-formed bonding  $\sigma_{\text{Mn-C}}$  orbital has a strong covalent character (28% Mn and 55% CO<sub>2</sub>). Although the  $\sigma_{\text{Mn-C}}$  orbital is partially delocalized to the carbonyl ligands, the system is best described as a resonance form between a Mn<sup>I</sup> center (S<sub>Mn</sub>=0) bound to a (CO<sub>2</sub>)<sup>2-</sup> ligand and a Mn<sup>I</sup> center bound to a neutral CO<sub>2</sub> ligand. Hence this step corresponds to a two-electron transfer from the ligand to the metal concomitant with a one-electron transfer from the metal to the CO<sub>2</sub> moiety. The subsequent protonation of the adduct yielding a [Mn(bpy)(CO<sub>2</sub>H)(CO)<sub>3</sub>]K<sup>+</sup> further polarizes the Mn-C<sub>CO<sub>2</sub></sub> bond since the bonding molecular orbital is about 28% Mn and 63% CO<sub>2</sub>H. In two distinct subsequent steps, an electron is transferred to the catalyst from the electrode and the C-O bond is cleaved concomitantly with a second proton transfer. As elaborated elsewhere,<sup>19</sup> the electron transfer may be before (reduction-first) or after (protonation-first) the proton-assisted cleavage of the bond. We did not investigate that level of details. However, this two-steps sequence yields a metal-carbonyl adduct. In this species, the  $\sigma_{\text{Mn-C}}$  orbital is mainly CO centered, and the Löwdin populations remain almost identical to

those of the metallacarboxylic acid (30% Mn, 64% CO). The additional electron transferred from the electrode resides in the  $1\pi^*$ , here primarily composed of the bpy  $\pi^*$  fragment orbital. Furthermore, this species feature significant backdonation from the Mn  $d_{xz}$  and  $d_{yz}$  to the empty  $\pi^*$  orbitals of the CO ligand. Therefore, the electronic structure of this species is identified as a  $Mn^I$  species ( $S_{Mn}=0$ ) bound to a radical  $bpy^{\cdot-}$  ( $S_{bpy}=1/2$ ) and a CO ligand.

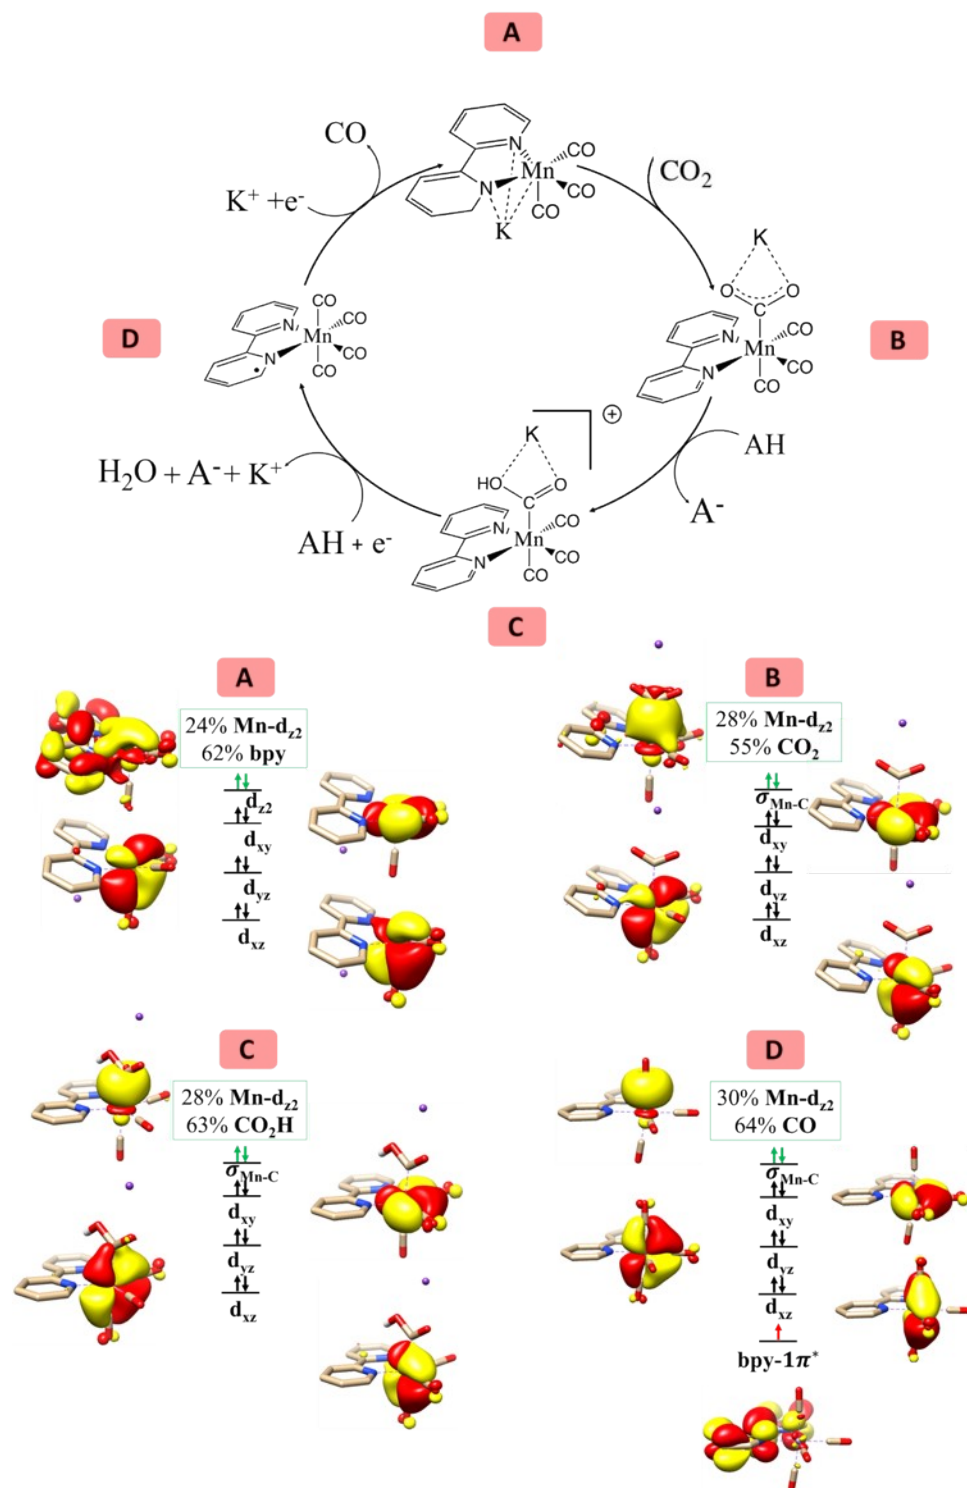

**Figure S13:** (Top) catalytic cycle of CO<sub>2</sub>-to-CO conversion catalysed with [Mn(bpy)(CO)<sub>3</sub>]K. The mechanism is taken from the reference 19. A K<sup>+</sup> counterion was added to the reaction complex, by analogy to the mechanistic studies on the very similar [Re(bpy)(CO)<sub>3</sub>]K complex described in reference 15. Dashed bond correspond to weak bonds formed with the K<sup>+</sup> ion. (Bottom) associated electronic structure of the intermediates [Mn(bpy)(CO)<sub>3</sub>]K (A), [Mn(bpy)(CO<sub>2</sub>)(CO)<sub>3</sub>]K (B), [Mn(bpy)(CO<sub>2</sub>H)(CO)<sub>3</sub>]K<sup>+</sup> (C), and [Mn(bpy)(CO)<sub>4</sub>]. The electrons occupying the d-orbitals of the metal and the redox-active orbitals of the ligand are represented by arrows. Electrons involved in the ligand-to-metal and metal-to-CO<sub>2</sub> intramolecular transfer are shown by green arrows. The Mn, bpy Löwdin population of the 1π\* orbital (for A) and the Mn, bpy and CO<sub>2</sub>/CO<sub>2</sub>H/CO Löwdin population of the σ<sub>Mn-C</sub> bonding orbital (for B-D) is displayed circled in green. Carbons are displayed in beige, oxygen in red and iron in orange. For clarity, all hydrogens are hidden except the hydrogen of the CO<sub>2</sub>H motif.

g) Intermediates in the reduction of CO<sub>2</sub> catalyzed with [Cr(bpy)(CO)<sub>3</sub>]<sup>2-</sup>

**Table S7:** Electronic energy difference (in kcal/mol) between the spin states of each intermediate involved in the mechanism of CO<sub>2</sub> reduction catalysed with [Cr(bpy)(CO)<sub>3</sub>]<sup>2-</sup>. For each line, the energy is given relative to the lowest-lying spin state of the intermediate.

|                                                             | S=0 | S=1  | S=2  |
|-------------------------------------------------------------|-----|------|------|
| [Cr(bpy)(CO) <sub>3</sub> ] <sup>2-</sup>                   | 0   | 18.3 | 52.5 |
| [Cr(bpy)(CO <sub>2</sub> )(CO) <sub>3</sub> ] <sup>2-</sup> | 0   | 11.8 | 50.7 |
| [Cr(bpy)(CO <sub>2</sub> H)(CO) <sub>3</sub> ] <sup>-</sup> | 0   | 25.8 | 62.9 |
| [Cr(bpy)(CO) <sub>4</sub> ] <sup>-</sup>                    | 0   | 45.6 | 74.5 |

This mechanism is similar to that of [Re(bpy)(CO)<sub>3</sub>]<sup>-</sup>. The active species, [Cr(bpy)(CO)<sub>3</sub>]<sup>2-</sup> possesses a square-pyramidal ligand field. It is identified as a Cr<sup>0</sup> center (S<sub>Cr</sub>=0) bound to a doubly-reduced bpy<sup>2-</sup> ligand (S<sub>bpy</sub>=0). In details, the Cr center has a (d<sub>xy</sub>)<sup>2</sup>(d<sub>xz</sub>)<sup>2</sup>(d<sub>yz</sub>)<sup>2</sup> configuration, and the HOMO of [Cr(bpy)(CO)<sub>3</sub>]<sup>2-</sup> (1π\*) is an admixture of Cr d<sub>22</sub> and bpy π\* fragment orbitals (17% Cr, 75% bpy). During the formation of the adduct [Cr(bpy)(CO)<sub>3</sub>(CO<sub>2</sub>)]<sup>2-</sup>, a two-electron transfer from the 1π\* orbital to the formally empty d<sub>22</sub> orbital takes place, and the latter orbital donates the electron density into the CO<sub>2</sub> in-plane π<sub>ip</sub>\* orbital. The subsequently formed bonding orbital σ<sub>Cr-C</sub> demonstrates a significant covalent Cr-C<sub>CO2</sub> bond (31% Cr, 51% CO<sub>2</sub>), although the orbital remains partially delocalized over the

carbonyl ligands. This intermediate is best described as a resonant structure between a  $\text{Cr}^0$  center ( $S_{\text{Cr}}=0$ ) bound to a  $(\text{CO}_2)^{2-}$  ligand and a  $\text{Cr}^{\text{II}}$  center bound to a  $\text{CO}_2$  ligand. The proton transfer step affording the metallarboxylic acid intermediate increases the weight of the  $\text{CO}_2\text{H}$  motif in the bonding orbital (28% Cr, 64%  $\text{CO}_2\text{H}$ ). Here, the system is best described as a  $\text{Cr}^0$  ( $S_{\text{Cr}}=0$ ) bound to a  $(\text{CO}_2\text{H})^-$  ligand. The two subsequent steps are the proton-assisted C-O bond cleavage and electron transfer from the electrode, in an unknown order. Determining whether this species follows a “protonation-first” or “reduction-first” pathway is beyond the scope of this study. However, this two-step sequence yields a metal-carbonyl adduct. The  $1\sigma$  bonding orbital remains mainly centered around CO (29% Cr, 65% CO) but does not further polarize. The electron is transferred from the electrode to the  $1\pi^*$  orbital, entirely centered around the ligand. Hence the system is best described as a  $\text{Cr}^0$  ( $S_{\text{Cr}}=0$ ) bound to a carbonyl and a  $\text{bpy}^{\cdot-}$  ligand ( $S_{\text{bpy}}=1/2$ ).

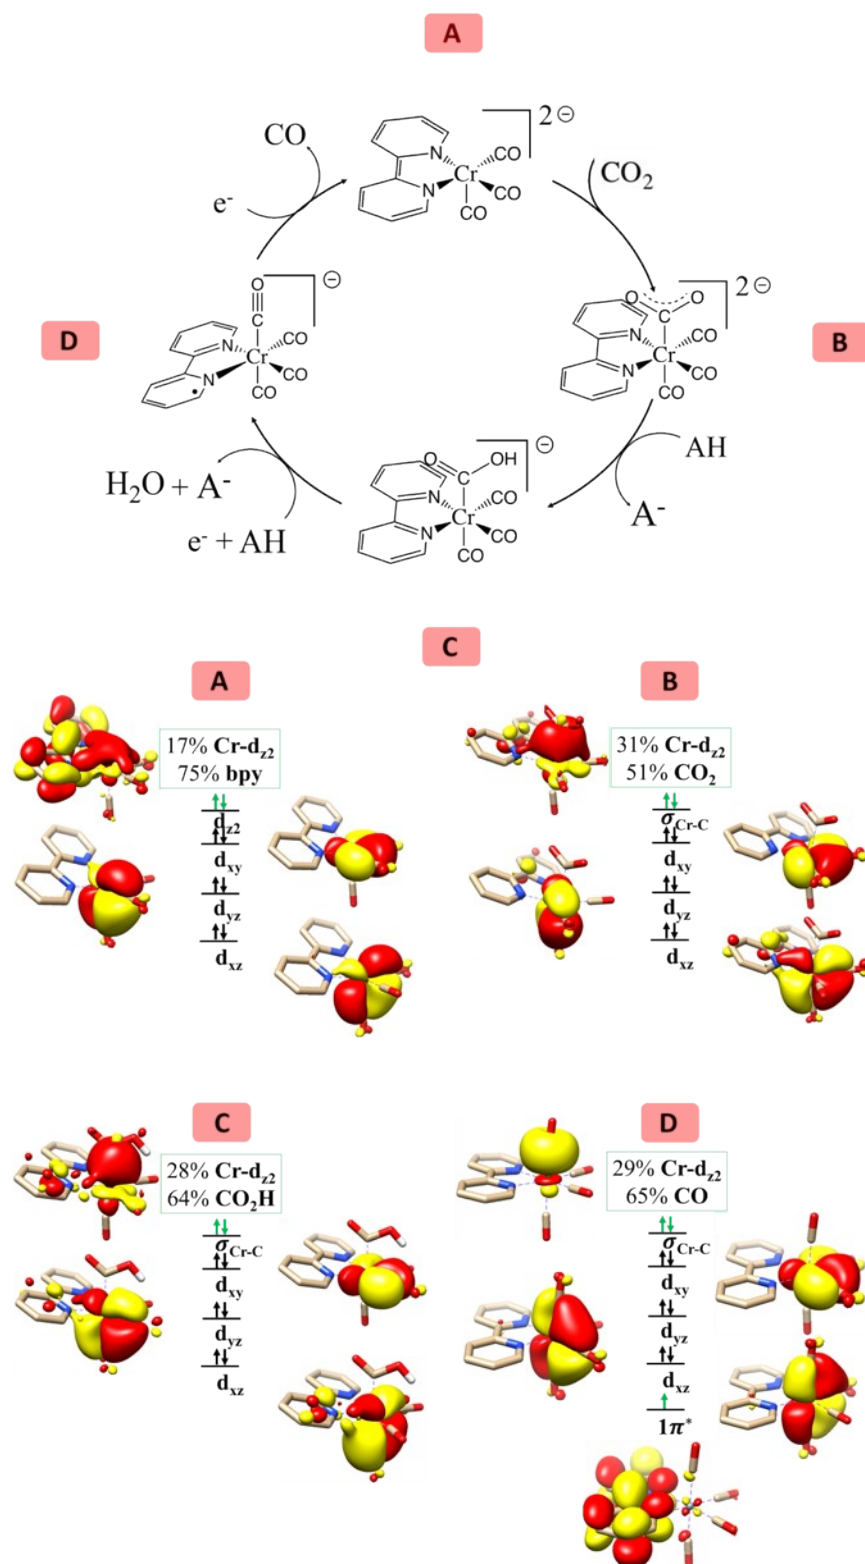

**Figure S14:** (Top) catalytic cycle of CO<sub>2</sub>-to-CO conversion catalysed with [Cr(bpy)(CO)<sub>3</sub>]<sup>2-</sup>. The type of mechanism is postulated to be similar to that of [Re(bpy)(CO)<sub>3</sub>]<sup>-</sup> and [Mn(bpy)(CO)<sub>3</sub>]<sup>-</sup>. Cyclic voltammetry data suggests the active species is [Cr(bpy)(CO)<sub>3</sub>]<sup>2-</sup>.<sup>3</sup> (Bottom) associated electronic structure of the intermediates [Cr(bpy)(CO)<sub>3</sub>]<sup>2-</sup> (A), [Cr(bpy)(CO)<sub>3</sub>(CO<sub>2</sub>)]<sup>2-</sup> (B), [Cr(bpy)(CO)<sub>3</sub>(CO<sub>2</sub>H)]<sup>-</sup> (C), and [Cr(bpy)(CO)<sub>4</sub>] (D). The

electrons occupying the d-orbitals of the metal and the redox-active orbitals of the ligand are represented by arrows. Electrons involved in the ligand-to-metal and metal-to-CO<sub>2</sub> intramolecular transfer are shown by green arrows. The Cr, bpy Löwdin population of the orbital  $1\pi^*$  (for A) and the Cr, bpy, CO<sub>2</sub>/CO<sub>2</sub>H/CO Löwdin population of the  $\sigma_{\text{Cr-C}}$  bonding orbital (for B-D) is displayed circled in green. Carbons are displayed in beige, oxygen in red and iron in orange. For clarity, all hydrogens are hidden except the hydrogen of the CO<sub>2</sub>H motif.

h) Intermediates in the reduction of CO<sub>2</sub> catalyzed with [Ru(bpy)<sub>2</sub>(CO)]

**Table S8:** Electronic energy difference (in kcal/mol) between the spin states of each intermediate involved in the mechanism of CO<sub>2</sub> reduction catalysed with [Ru(bpy)<sub>2</sub>(CO)]. For each line, the energy is given relative to the lowest-lying spin state of the intermediate.

| Intermediate                                                | S=0 | S=1   | S=2    |
|-------------------------------------------------------------|-----|-------|--------|
| [Ru(bpy) <sub>2</sub> (CO)]                                 | 0   | +8.6  | +40.7  |
| [Ru(bpy) <sub>2</sub> (CO)(CO <sub>2</sub> )]               | 0   | +30.3 | +63.8  |
| [Ru(bpy) <sub>2</sub> (CO)(CO <sub>2</sub> H)] <sup>+</sup> | 0   | +53.0 | +118.5 |
| [Ru(bpy) <sub>2</sub> (CO)(CO)] <sup>2+</sup>               | 0   | +64.8 | +128.7 |

The active species, [Ru(bpy)<sub>2</sub>(CO)], has a square-pyramidal ligand-field symmetry similar to [Re(bpy)(CO)<sub>3</sub>]<sup>-</sup>. The ruthenium has a  $(d_{xy})^2(d_{xz})^2(d_{yz})^2$  electronic configuration. The HOMO of [Ru(bpy)<sub>2</sub>(CO)] ( $1\pi^*$ ) is strongly delocalized and mainly corresponds to an admixture of Ru  $d_{22}$  (44%) and bpy  $\pi^*$  (33%) from one bipyridine ligand. Hence the system is best described as a hybrid form between a Ru<sup>II</sup> ( $S_{\text{Ru}}=0$ ) system bound to a  $(\text{bpy})^{2-}$  ( $S_{\text{bpy}}=0$ ), and a Ru<sup>0</sup> bound to a neutral bpy ligand. During the formation of the adduct [Ru(bpy)<sub>2</sub>(CO)(CO<sub>2</sub>)], two electron transfers from the  $1\pi^*$  orbital to the  $d_{22}$  orbital takes place, and the latter orbital donates two electrons into the CO<sub>2</sub> in-plane  $\pi^*$  orbital. The subsequently-formed bonding orbital  $\sigma_{\text{Ru-C}}$  is strongly covalent (46% Ru and 49% CO<sub>2</sub>), such that the species is best described as a resonant hybrid between a Ru<sup>II</sup> center ( $S_{\text{Ru}}=0$ ) bound to a  $(\text{CO}_2)^{2-}$  ligand and a Ru<sup>0</sup> center ( $S_{\text{Ru}}=0$ ) bound to a CO<sub>2</sub> ligand. The bpy ligand is neutral. Hence, this step corresponds to an overall electron transfer from the bpy ligand to the CO<sub>2</sub>. The subsequent protonation further polarizes  $\sigma_{\text{Ru-C}}$  (37% Ru and 59% CO<sub>2</sub>H). However, the bond is still strongly covalent and the oxidation state of the ruthenium remains ambiguous. Finally, the proton-assisted cleavage of the C-O bond yields a metal-carbonyl adduct. The bonding orbital  $\sigma_{\text{Ru-C}}$  is largely CO-centered

at this point, (32% Ru, 64% CO) and the system unambiguously described as a Ru<sup>II</sup> center ( $S_{\text{Ru}}=0$ ) bound to a carbonyl ligand.

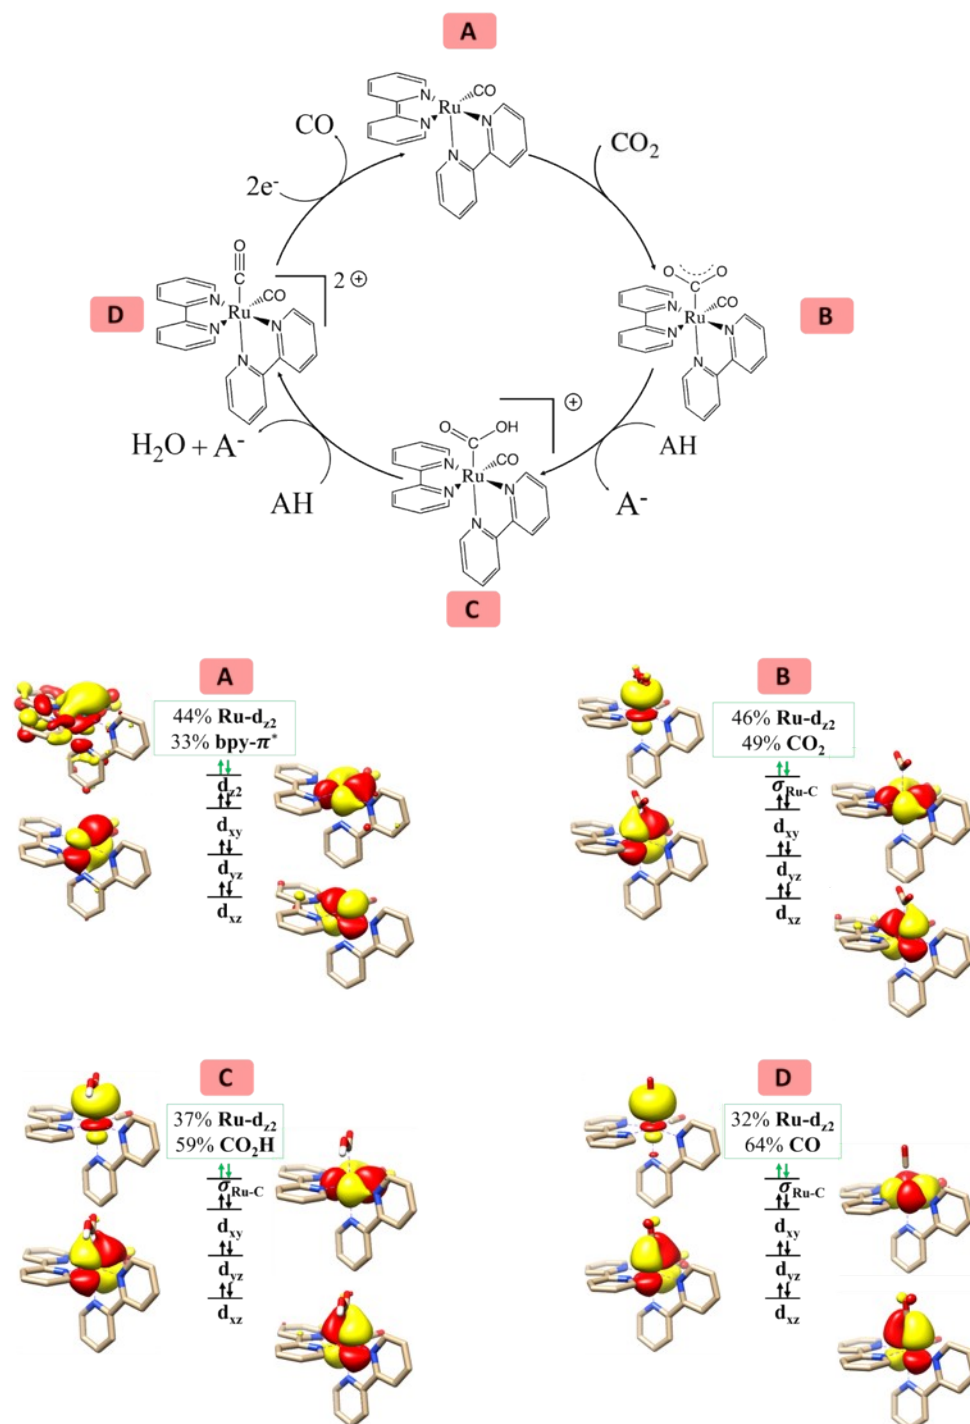

**Figure S15:** (Top) catalytic cycle of CO<sub>2</sub>-to-CO conversion catalysed with [Ru(bpy)<sub>2</sub>(CO)]. The mechanism is taken from the reference 7. (Bottom) associated electronic structure of the intermediates [Ru(bpy)<sub>2</sub>(CO)] (A), [Ru(bpy)<sub>2</sub>(CO)(CO<sub>2</sub>)] (B), [Ru(bpy)(tpy)(CO)(CO<sub>2</sub>H)]<sup>+</sup>

(C), and  $[\text{Ru}(\text{bpy})_2(\text{CO})_2]^{2+}$  (D). The electrons occupying the d-orbitals of the metal and the redox-active orbitals of the ligand are represented by arrows. Electrons involved in the ligand-to-metal and metal-to- $\text{CO}_2$  intramolecular transfer are shown by green arrows. The Ru, bpy Löwdin population of the orbital  $1\pi^*$  (A) and Ru and  $\text{CO}_2/\text{CO}_2\text{H}/\text{CO}$  Löwdin population of the  $\sigma_{\text{Ru-C}}$  bonding orbital is displayed circled in green. Carbons are displayed in beige, oxygen in red and iron in orange. For clarity, all hydrogens are hidden except the hydrogen of the  $\text{CO}_2\text{H}$  motif.

i) Intermediates in the reduction of  $\text{CO}_2$  catalyzed with  $[\text{Ru}(\text{bpy})(\text{tpy})]$

**Table S9:** Electronic energy difference (in kcal/mol) between the spin states of each intermediate involved in the mechanism of  $\text{CO}_2$  reduction catalysed with  $[\text{Ru}(\text{bpy})(\text{tpy})]$ . For each line, the energy is given relative to the lowest-lying spin state of the intermediate.

| Intermediate                                       | S=0  | S=1  | S=2  |
|----------------------------------------------------|------|------|------|
| $[\text{Ru}(\text{bpy})(\text{tpy})]$              | 0    | 7.7  | 34.1 |
| $[\text{Ru}(\text{bpy})(\text{tpy})(\text{CO}_2)]$ | 0    | 58.7 | 63.7 |
| $[\text{Ru}(\text{bpy})(\text{tpy})(\text{CO})]$   | <0.1 | 0    | 50.7 |

Unlike most investigated catalysts, this catalyst yields CO under aprotic conditions, following the stoichiometric equation:

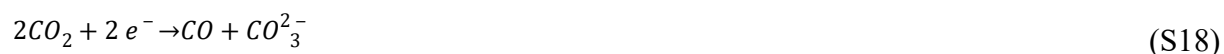

Very similar to  $[\text{Re}(\text{bpy})(\text{CO})_3]^-$ , the active form of the catalyst exhibits a ligand field best described as a deformed square-pyramidal. The ruthenium has a  $(d_{xy})^2(d_{xz})^2(d_{yz})^2$  electronic configuration and the HOMO ( $1\pi^*$ ) is a mixture of 27% Ru  $d_{z^2}$  and 69% tpy  $\pi^*$  orbital. Hence, the species can be described as a  $\text{Ru}^{\text{II}}$  ( $S_{\text{Ru}}=0$ ) bound to a  $\text{tpy}^{2-}$  ligand. During the formation of the adduct  $[\text{Ru}(\text{bpy})(\text{tpy})(\text{CO}_2)]$ , a two-electron transfer from the  $1\pi^*$  orbital to the formally empty  $d_{z^2}$  orbital takes place, and the latter orbital donates the electron density into the  $\text{CO}_2$  in-plane  $\pi^*$  orbital. The subsequently-formed bonding orbital is strongly covalent (44% Ru and 49%  $\text{CO}_2$ ), such that the species is best described as a resonant hybrid between a  $\text{Ru}^{\text{II}}$  center ( $S_{\text{Ru}}=0$ ) bound to a  $(\text{CO}_2)^{2-}$  ligand and a  $\text{Ru}^0$  center ( $S_{\text{Ru}}=0$ ) bound to a  $\text{CO}_2$  ligand. Thus it is safe to consider this step as a first electron transfer to the  $\text{CO}_2$  motif. Subsequently, the catalyst accepts two electrons from the electrode. The electron-accepting orbitals  $1\pi^*$  and  $2\pi^*$  are entirely terpyridine- and bipyridine-based, respectively. The subsequent C-O bond cleavage



yields a metal-carbonyl. In the latter species, the bonding orbital is largely CO-centered (33% Ru, 63% CO). Hence this step can be interpreted as the second electron transfer to CO<sub>2</sub>. Meanwhile, the two electrons previously transferred from the electrode remained centered on the ligand. Hence, this species can be interpreted as a Ru<sup>II</sup> center ( $S_{\text{Ru}}=0$ ) bound to a bpy<sup>•-</sup> and a tpy<sup>•-</sup> ligands. Notably, the energy the present triplet state and the singlet state is below the error range of DFT for this intermediate. The latter is a closed-shell system in which a Ru<sup>II</sup> ( $S_{\text{Ru}}=0$ ) of similar electronic configuration is bound to a tpy<sup>2-</sup> ligand and a neutral bpy ligand instead of two radical ligands bpy<sup>•-</sup> and tpy<sup>•-</sup>.

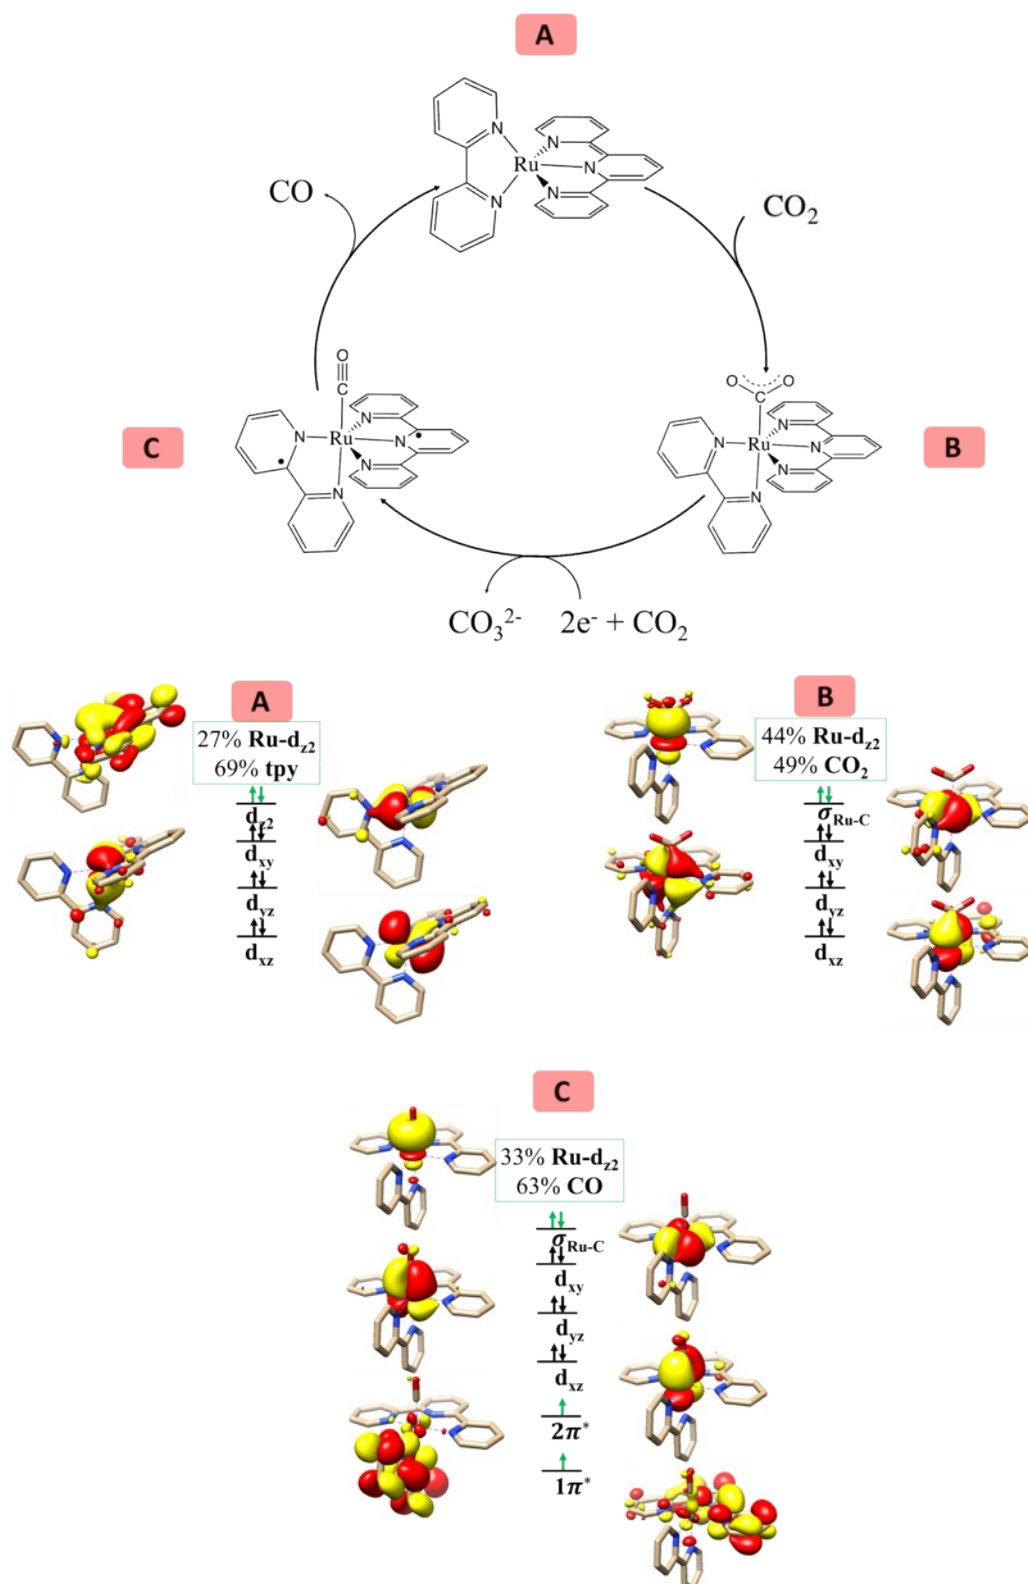

**Figure S16:** (Top) catalytic cycle of CO<sub>2</sub>-to-CO conversion catalysed with [Ru(bpy)(tpy)]. The mechanism is taken from the reference 8. (Bottom) associated electronic structure of the intermediates [Ru(bpy)(tpy)] (A), [Ru(bpy)(tpy)(CO<sub>2</sub>)] (B), and [Ru(bpy)(tpy)(CO)] (C). The electrons occupying the d-orbitals of the metal and the redox-active orbitals of the ligand are

represented by arrows. Electrons involved in the ligand-to-metal and metal-to-CO<sub>2</sub> intramolecular transfer are shown by green arrows. The Ru, tpy Löwdin population of the orbital 1 $\pi^*$  (A) and Ru and CO<sub>2</sub>/CO<sub>2</sub>H/CO Löwdin population of the  $\sigma_{\text{Ru-C}}$  bonding orbital (B-D) is displayed circled in green. Carbons are displayed in beige, oxygen in red and iron in orange. For clarity, all hydrogens are hidden except the hydrogen of the CO<sub>2</sub>H motif.

#### 6) Energy of the calculated structures

**Table S10:** Electronic energies, enthalpies and free energy for each of the studied intermediates of the CO<sub>2</sub>-to-CO conversion, CO<sub>2</sub>-to-HCOOH conversion and hydrogen evolution reaction catalysed by **<sup>1</sup>I<sup>2-</sup>**. The electronic energy consists of the sum of terms  $E_{el} + \Delta E_{el}$  in eq. 1a (Main Text). Except mentioned otherwise, the energy is obtained at the B3LYP/Def2-TZVPP level of theory, as explicated in the main text. For **PhOH**, **<sup>1</sup>TS2** and **<sup>1</sup>TS3**, a single-point using the double-hybrid function w-B2PLYP and the basis set Def2-QZVPP was also calculated. The enthalpy consists of the sum of all terms in eq. 1a (Main Text). The Free energy corresponds to the sum of all terms in eq. 1b (Main Text). All energies are displayed in Hartrees. The energy reference is that of all atoms and electrons infinitely separated in vacuum. All compounds in bold are schematically drawn in Figure 1 (Main Text) and Figure S6.

| Compound                          | El. Energy    | Enthalpy      | Free energy.  |
|-----------------------------------|---------------|---------------|---------------|
| <b><sup>3</sup>I</b>              | -3176.06465   | -3175.42925   | -3175.51875   |
| <b><sup>2</sup>I</b>              | -3176.17597   | -3175.54762   | -3175.63647   |
| <b><sup>1</sup>I<sup>2-</sup></b> | -3176.26322   | -3175.64346   | -3175.73183   |
| <b><sup>3</sup>I<sup>2-</sup></b> | -3176.25194   | -3175.63322   | -3175.72281   |
| <b><sup>5</sup>I<sup>2-</sup></b> | -3176.24213   | -3175.62250   | -3175.71249   |
| <b><sup>1</sup>TS1</b>            | -3364.85261   | -3364.21730   | -3364.310805  |
| <b><sup>1</sup>A</b>              | -3364.86420   | -3364.22860   | -3364.321159  |
| <b><sup>3</sup>A</b>              | -3364.85304   | -3364.21837   | -3364.31633   |
| <b><sup>5</sup>A</b>              | -3364.84656   | -3364.20995   | -3364.30901   |
|                                   | (Dissociated) | (Dissociated) | (Dissociated) |
| <b><sup>1</sup>B</b>              | -3672.33143   | -3671.58263   | -3671.69025   |
| <b><sup>1</sup>C</b>              | -3979.78454   | -3978.92216   | -3979.03767   |
| <b><sup>1</sup>TS2</b>            | -3979.76284   | -3978.90247   | -3979.02106   |

|                                                        |             |             |              |
|--------------------------------------------------------|-------------|-------------|--------------|
| <b><sup>1</sup>TS2 (w-B2PLYP)</b>                      | -3975.90886 | -3975.04849 | -3975.16708  |
| <b><sup>1</sup>TS3</b>                                 | -3672.31636 | -3671.57053 | -3671.67523  |
| <b><sup>1</sup>TS3 (w-B2PLYP)</b>                      | -3668.87136 | -3668.12553 | -3668.23023  |
| <b><sup>1</sup>D + PhO<sup>-</sup></b>                 | -3672.32025 | -3671.57076 | -3671.67558  |
| <b><sup>1</sup>D</b>                                   | -3365.35250 | -3364.69560 | -3364.78858  |
| <b><sup>3</sup>D</b>                                   | -3365.32961 | -3364.67396 | -3364.76896  |
| <b><sup>5</sup>D</b>                                   | -3365.31805 | -3364.66309 | -3364.75968  |
| <b><sup>1</sup>TS5</b>                                 | -3365.27937 | -3364.63020 | -3364.719416 |
| <b><sup>1</sup>E</b>                                   | -3672.81569 | -3672.04672 | -3672.15331  |
| <b><sup>1</sup>TS4</b>                                 | -3672.79696 | -3672.03337 | -3672.14072  |
| <b><sup>1</sup>F</b>                                   | -3289.39413 | -3288.74772 | -3288.83968  |
| <b><sup>3</sup>F</b>                                   | -3289.38116 | -3288.73697 | -3288.83162  |
| <b><sup>5</sup>F</b>                                   | -3289.37548 | -3288.73186 | -3288.82847  |
| <b><sup>1</sup>TS6</b>                                 | -3483.68772 | -3482.96355 | -3483.05973  |
| <b><sup>1</sup>M</b>                                   | -3176.7347  | -3176.09891 | -3176.18736  |
| <b><sup>3</sup>M</b>                                   | -3176.72224 | -3176.08997 | -3176.17939  |
| <b><sup>5</sup>M</b>                                   | -3176.70962 | -3176.07733 | -3176.16789  |
| <b><sup>1</sup>N</b>                                   | -3365.3771  | -3364.72071 | -3364.81686  |
| <b><sup>3</sup>N</b>                                   | -3365.38696 | -3364.73079 | -3364.82850  |
| <b><sup>5</sup>N</b>                                   | -3365.38898 | -3364.73402 | -3364.83332  |
| CO2                                                    | -188.59192  | -188.57654  | -188.59326   |
| PhOH                                                   | -307.44200  | -307.33077  | -307.35834   |
| PhOH (w-B2PLYP)                                        | -307.03966  | -306.92843  | -306.95600   |
| PhO <sup>-</sup>                                       | -306.95431  | -306.86203  | -306.8892    |
| H2O                                                    | -76.43994   | -76.41509   | -76.42897    |
| OH <sup>-</sup>                                        | -75.91738   | -75.91019   | -75.92217    |
| [OH <sub>2</sub> ...(OPh) <sub>2</sub> ] <sup>2-</sup> | -690.37506  | -690.15945  | -690.20644   |
| [OH <sub>2</sub> ...OPh] <sup>-</sup>                  | -383.40927  | -383.28869  | -383.321755  |
| H <sub>2</sub>                                         | -1.17383    | -1.16043    | -1.16751     |

7) Cartesian coordinates and imaginary normal modes of vibrations for the intermediates and transition states involved in CO<sub>2</sub> reduction and H<sub>2</sub> generation by 1<sup>2-</sup>

a) <sup>31</sup>

No Imaginary frequencies.

|    |                   |                   |                   |
|----|-------------------|-------------------|-------------------|
| Fe | -2.09956900610000 | 7.95205437800771  | 8.88522516735839  |
| N  | -3.55149084089256 | 8.96821217798403  | 9.82446494997772  |
| N  | -3.24827057786289 | 7.82752589080681  | 7.24556272290606  |
| N  | -0.64809305562093 | 6.93507675059479  | 7.94642524973733  |
| N  | -0.95059841987550 | 8.07711055560886  | 10.52488607022642 |
| C  | -3.51200156394445 | 9.49026661929519  | 11.10390087702745 |
| C  | -4.77533177951535 | 9.34798357006235  | 9.30499564191538  |
| C  | -4.51757120510103 | 8.34741449431300  | 7.07234200820083  |
| C  | -2.93643359264416 | 7.20111444691082  | 6.05312645543189  |
| C  | -0.68817694964835 | 6.41158156550892  | 6.66759000372065  |
| C  | 0.31944138344332  | 7.55884832645850  | 10.69751021331391 |
| C  | -1.26222034528808 | 8.70405697830422  | 11.71706156366774 |
| C  | -4.72539124013780 | 10.21695648149780 | 11.38486981265243 |
| H  | -4.94147538319853 | 10.73815174973789 | 12.31351847012792 |
| C  | -5.50802333598863 | 10.12829767369694 | 10.27078195694508 |
| H  | -6.49064583555603 | 10.56261731303134 | 10.10748070295094 |
| C  | -5.00783116942454 | 8.03985948155799  | 5.75166655808307  |
| H  | -5.98044074310450 | 8.32828918225882  | 5.36240302791172  |
| C  | -4.02451240325159 | 7.33878636464877  | 5.11692299519809  |
| H  | -4.03239644934755 | 6.94593812892204  | 4.10388696704852  |
| C  | 0.81066085051622  | 7.86859372412466  | 12.01733570873627 |
| C  | -0.17296661554894 | 8.56903013296777  | 12.65229916524135 |
| H  | -0.16467465104321 | 8.96301776052326  | 13.66489336955794 |
| C  | -5.25250109486044 | 9.06302035907643  | 8.02214471486367  |
| C  | -1.74665370972964 | 6.52721135868144  | 5.76141560721127  |
| C  | -2.45292511446823 | 9.37591676494710  | 12.00950764851656 |

|   |                    |                   |                   |
|---|--------------------|-------------------|-------------------|
| C | -6.61568455701381  | 9.54892332748129  | 7.64599595471707  |
| C | -7.76111933567562  | 8.96114215056734  | 8.20725399710913  |
| H | -7.64696621071573  | 8.14403445611218  | 8.92388162980980  |
| C | -9.03659258973629  | 9.40900080938186  | 7.85117193728658  |
| C | -6.77245610617097  | 10.59667188645093 | 6.72367602854450  |
| H | -5.88599143616032  | 11.06184356920440 | 6.28567181459316  |
| C | -1.60304670232057  | 5.88756640933091  | 4.41784568990932  |
| C | -0.71824315904807  | 6.41569815365652  | 3.46363548565868  |
| H | -0.13546719358366  | 7.30687660429089  | 3.70903176512773  |
| C | -0.58346751800261  | 5.81300350986358  | 2.20947977772309  |
| H | 0.10671272939519   | 6.23673316632569  | 1.47535448453150  |
| C | -1.33023375614220  | 4.67281515910606  | 1.89404306894057  |
| H | -1.22428255441712  | 4.20110914480658  | 0.91378126342970  |
| C | -2.21331444980701  | 4.13895980420402  | 2.83896499130190  |
| H | -2.79738225133167  | 3.24596436924856  | 2.60163601687780  |
| C | -2.34928966769881  | 4.74300842941947  | 4.09207189019970  |
| H | -3.03668904705723  | 4.32419684085937  | 4.83113044174409  |
| C | -2.59683887806876  | 10.01514276633004 | 13.35330046537887 |
| C | -3.47801141259345  | 9.48346778693206  | 14.30887876247083 |
| H | -4.05776942470417  | 8.59009104382171  | 14.06432496205406 |
| C | -1.85455742677945  | 11.16258688109138 | 13.67780687950330 |
| H | -1.17003648090721  | 11.58407091664410 | 12.93759346570205 |
| C | -3.61307243178370  | 10.08556785399247 | 15.56331109683333 |
| H | -4.30042235289746  | 9.65913666685451  | 16.29852595028492 |
| C | -2.87020437650496  | 11.22863391948547 | 15.87754681115127 |
| H | -2.97629254544522  | 11.69982991116109 | 16.85804220773317 |
| C | -1.99082921981437  | 11.76602547788312 | 14.93118682536720 |
| H | -1.40989472829823  | 12.66129898673865 | 15.16761684917815 |
| C | -9.18312374072065  | 10.45264394359792 | 6.93076214344331  |
| H | -10.18033245417152 | 10.80322006261325 | 6.65226161778597  |
| C | -8.04773954793880  | 11.04602515676561 | 6.36864169645635  |
| H | -8.15467797915032  | 11.86437068719001 | 5.65171995301868  |
| H | 3.95769969518147   | 4.04512577765050  | 12.12175300066229 |

|   |                   |                  |                   |
|---|-------------------|------------------|-------------------|
| H | 5.98253103301287  | 5.10343854368360 | 11.11655666843500 |
| C | 0.57552855346440  | 6.55491594161683 | 8.46617504179399  |
| C | 0.52423770277826  | 5.68287239319178 | 6.38761249158461  |
| H | 0.73957078872907  | 5.15989834234309 | 5.45979817816850  |
| C | 1.30711866436941  | 5.77226336531627 | 7.50145942569206  |
| H | 2.28923941023094  | 5.33702748877132 | 7.66532381513335  |
| H | 1.78408850457690  | 7.58191069808792 | 12.40585117719906 |
| C | 1.05369023927001  | 6.84190825679031 | 9.74821782090317  |
| C | 2.41719238532643  | 6.35659077784785 | 10.12401569401336 |
| C | 2.57464821433358  | 5.31088256542435 | 11.04856096754460 |
| H | 1.68852927824875  | 4.84698101304626 | 11.48859811809999 |
| C | 3.85019195609483  | 4.86191096905666 | 11.40313816917964 |
| C | 4.98511458661361  | 5.45370560877548 | 10.83840690999427 |
| C | 4.83788686884646  | 6.49534623851400 | 9.91585126036752  |
| H | 5.72004255087900  | 6.96427630647936 | 9.47231999974153  |
| C | 3.56215004143281  | 6.94278322285829 | 9.56016605626412  |
| H | 3.44739964360577  | 7.75829551546503 | 8.84182036847660  |
| H | -9.91907048809681 | 8.93879169818988 | 8.29270637181018  |

b)  $^{21}$

No imaginary frequency.

|    |                   |                  |                   |
|----|-------------------|------------------|-------------------|
| Fe | -2.13286992952002 | 7.93760308278297 | 8.88232143118719  |
| N  | -3.58682551764760 | 8.96483063362922 | 9.83338322808550  |
| N  | -3.28433812417143 | 7.78871318707596 | 7.26002348980587  |
| N  | -0.68833012363692 | 6.88294162406422 | 7.94518835035653  |
| N  | -0.97026858433677 | 8.11014912058203 | 10.49148330696221 |
| C  | -3.51802153182175 | 9.56003155122638 | 11.08415535655750 |
| C  | -4.84434511282681 | 9.27997852796560 | 9.33963858508827  |
| C  | -4.58890947240828 | 8.26112897262302 | 7.10779798002278  |
| C  | -2.95166432298203 | 7.21642036554033 | 6.03201051887133  |
| C  | -0.71881508478305 | 6.37844520134263 | 6.65647565381508  |

|   |                   |                   |                   |
|---|-------------------|-------------------|-------------------|
| C | 0.29293270917041  | 7.54780202673292  | 10.67941056648546 |
| C | -1.23632316996047 | 8.82175867910224  | 11.66050199365467 |
| C | -4.72707466035464 | 10.25862160976255 | 11.36577687190656 |
| H | -4.93188806462720 | 10.82668016140584 | 12.26918360349524 |
| C | -5.56024746997135 | 10.07553601290383 | 10.27756758645833 |
| H | -6.56165041647285 | 10.47260250197769 | 10.13251443988277 |
| C | -5.06906564770274 | 7.96896397576116  | 5.77122791938517  |
| H | -6.05800576781037 | 8.21680977735858  | 5.39466385218459  |
| C | -4.05773844805060 | 7.35747794357595  | 5.10412580085159  |
| H | -4.05683125045587 | 7.01217289183921  | 4.07371229811378  |
| C | 0.82024609170203  | 7.93015006007255  | 11.97336261229685 |
| C | -0.11585556591847 | 8.70568955235494  | 12.57640956359629 |
| H | -0.06517742481455 | 9.15624633894726  | 13.56363340648576 |
| C | -5.33841170424624 | 8.93036903641599  | 8.05881128618127  |
| C | -1.76315460699011 | 6.57914721031090  | 5.71821098063773  |
| C | -2.40271198728563 | 9.50860563468651  | 11.95849674203041 |
| C | -6.73085574810476 | 9.35147272363768  | 7.71517952870346  |
| C | -7.83596623758916 | 8.74645654048094  | 8.33871232816178  |
| H | -7.66293585189965 | 7.96358826038491  | 9.08144996106045  |
| C | -9.14063837223150 | 9.13232139444714  | 8.01542173445038  |
| C | -6.96778882521969 | 10.36197790151846 | 6.76751252563148  |
| H | -6.11618909363763 | 10.84681628159145 | 6.28438281968741  |
| C | -1.54501128423508 | 6.05557879081510  | 4.33740652767687  |
| C | -0.51695537028270 | 6.59244188141325  | 3.54097817193839  |
| H | 0.09164033902405  | 7.40717845855422  | 3.94061281529146  |
| C | -0.26479118371492 | 6.09266799361828  | 2.26105001818125  |
| H | 0.53794005695307  | 6.52441126052153  | 1.65729533444965  |
| C | -1.03929496409246 | 5.04341217751729  | 1.75182804162873  |
| H | -0.83358033488270 | 4.64304532325875  | 0.75535654761318  |
| C | -2.07245240733697 | 4.50695587412176  | 2.52786411173073  |
| H | -2.68346609149024 | 3.68840065239714  | 2.13749458453797  |
| C | -2.31955772348745 | 5.00697582749746  | 3.81105203247720  |
| H | -3.11458693615175 | 4.57315574244312  | 4.42234632704968  |



|   |                    |                   |                   |
|---|--------------------|-------------------|-------------------|
| C | -2.50024716396100  | 10.20589964449707 | 13.27551499780692 |
| C | -3.42834882020238  | 9.78906214877327  | 14.24784455084827 |
| H | -4.10207871957429  | 8.95974809247500  | 14.02006043973863 |
| C | -1.64205065169030  | 11.27543556560050 | 13.58900088723827 |
| H | -0.92488631736597  | 11.61677356507488 | 12.83840653631980 |
| C | -3.48688158028490  | 10.41252063672614 | 15.49722384450214 |
| H | -4.20818706538805  | 10.06690080916329 | 16.24280649214005 |
| C | -2.61282612451207  | 11.46312101284803 | 15.80178926854499 |
| H | -2.65022157505207  | 11.94450437007729 | 16.78252145689571 |
| C | -1.69199293285827  | 11.89551017390157 | 14.84136314393361 |
| H | -1.01049174656253  | 12.71983125976039 | 15.06859843534264 |
| C | -9.36320007048250  | 10.13217737157908 | 7.06037864352091  |
| H | -10.38118121022480 | 10.43603868724824 | 6.80047274889031  |
| C | -8.27131663812108  | 10.74758184936049 | 6.43821572866404  |
| H | -8.43631060716721  | 11.53385961340794 | 5.69659398022100  |
| H | 3.74331620955638   | 3.92494116007643  | 12.30492979000332 |
| H | 5.81931344139929   | 4.84724322648474  | 11.28048612613391 |
| C | 0.50145175823874   | 6.42808346543836  | 8.49437016694670  |
| C | 0.43776604933773   | 5.58396591436935  | 6.40714512282275  |
| H | 0.65381103769462   | 5.05690239618496  | 5.48174130850273  |
| C | 1.19798070105228   | 5.60940770904477  | 7.56196433280057  |
| H | 2.14666826961103   | 5.11202119396114  | 7.74671748261664  |
| H | 1.78947008454872   | 7.63092449915237  | 12.36416711062165 |
| C | 0.98121114985295   | 6.74707342204936  | 9.78644506977344  |
| C | 2.31684209314092   | 6.21023686420013  | 10.18794583373437 |
| C | 2.42554076449664   | 5.19903660788082  | 11.15698713178018 |
| H | 1.51569550327768   | 4.79746439775471  | 11.61001125425661 |
| C | 3.67704466075472   | 4.71124992826218  | 11.54810698522658 |
| C | 4.84203002597043   | 5.22801108926964  | 10.97055431598627 |
| C | 4.74646504093536   | 6.23065455051856  | 9.99733338974774  |
| H | 5.64985225414167   | 6.64339279830922  | 9.53968609023465  |
| C | 3.49377139541674   | 6.71494560477016  | 9.60909568263131  |
| H | 3.41791063375687   | 7.50019854287908  | 8.85287345610016  |

|   |                   |                  |                  |
|---|-------------------|------------------|------------------|
| H | -9.98570465799283 | 8.64506586868927 | 8.50931244826270 |
|---|-------------------|------------------|------------------|

c)  $1^2-$

No imaginary frequency.

|    |                   |                   |                   |
|----|-------------------|-------------------|-------------------|
| Fe | -2.13345963117138 | 7.94622471637990  | 8.87044966768869  |
| N  | -3.59892055754475 | 8.94076086674785  | 9.84405001255269  |
| N  | -3.29541569706779 | 7.80453445220167  | 7.21881915107865  |
| N  | -0.68555486261932 | 6.89592331511760  | 7.92521192217655  |
| N  | -0.95735716026373 | 8.12127938883634  | 10.50365711153554 |
| C  | -3.52063969214328 | 9.56170417116744  | 11.09366062447534 |
| C  | -4.88276777958958 | 9.20361323221776  | 9.36621514268073  |
| C  | -4.60966076487264 | 8.25343733570756  | 7.08297334413205  |
| C  | -2.93976010106884 | 7.28094115729122  | 5.97322401702515  |
| C  | -0.70450094899275 | 6.42347623801177  | 6.61368950807047  |
| C  | 0.29409735976861  | 7.53669372626889  | 10.69415283056128 |
| C  | -1.19969869429958 | 8.88665575281579  | 11.64644446956181 |
| C  | -4.76038395320810 | 10.21639770632791 | 11.38650637659842 |
| H  | -4.97139237044744 | 10.79121294016314 | 12.28477016105805 |
| C  | -5.60745988486758 | 9.98124271628009  | 10.32413402515097 |
| H  | -6.62562654674851 | 10.34226258791448 | 10.19774956579629 |
| C  | -5.07072726580599 | 8.00652871453330  | 5.75019383619159  |
| H  | -6.06276606309963 | 8.24204199997028  | 5.37262474239740  |
| C  | -4.02725690535892 | 7.43412289448577  | 5.05445660753205  |
| H  | -4.01947810211479 | 7.12711237158120  | 4.01152331342166  |
| C  | 0.84144621889136  | 7.95677809653873  | 11.94696676148160 |
| C  | -0.08247277889490 | 8.79206973227310  | 12.53827874381557 |
| H  | -0.00577034758341 | 9.27584057102028  | 13.50845104883639 |
| C  | -5.37826440982918 | 8.86513648569235  | 8.09150089029640  |
| C  | -1.71878893580812 | 6.65664107364909  | 5.66703509253762  |
| C  | -2.39289888982748 | 9.57604345768312  | 11.93397663862681 |
| C  | -6.78584155751240 | 9.24321302455768  | 7.77158707048493  |

|   |                    |                   |                   |
|---|--------------------|-------------------|-------------------|
| C | -7.86955756281354  | 8.62481343683029  | 8.42416877596359  |
| H | -7.66339593811883  | 7.85551085866477  | 9.17294142484753  |
| C | -9.19078921855539  | 8.97735636552059  | 8.12914494073317  |
| C | -7.07781145050452  | 10.23455862636640 | 6.81469635742189  |
| H | -6.25099770155787  | 10.73532523907126 | 6.30561301026044  |
| C | -1.47823455501083  | 6.17111910568413  | 4.27814788413529  |
| C | -0.41194744188763  | 6.69611878488527  | 3.52192294278242  |
| H | 0.20577315400411   | 7.48309323399084  | 3.96141399055027  |
| C | -0.12939082768648  | 6.22097683489183  | 2.23837222164417  |
| H | 0.70472812153813   | 6.64605384671503  | 1.67293808881324  |
| C | -0.91413545530716  | 5.20717453493038  | 1.67555305861977  |
| H | -0.68556031564555  | 4.82397228093529  | 0.67710629261963  |
| C | -1.98801346651299  | 4.68391411232290  | 2.40531517265005  |
| H | -2.60785345602828  | 3.89140831472822  | 1.97609026534783  |
| C | -2.26392521219631  | 5.16060868308831  | 3.69139785409367  |
| H | -3.09120738338546  | 4.73343546366221  | 4.26303446213301  |
| C | -2.46917451304265  | 10.30605968686986 | 13.23229865097084 |
| C | -3.38605203998037  | 9.92943531268099  | 14.23401000572101 |
| H | -4.07460390956207  | 9.10423014744342  | 14.03788380778115 |
| C | -1.59079769107016  | 11.37042878085939 | 13.51693360509364 |
| H | -0.87854507731215  | 11.68432395647431 | 12.74985475362938 |
| C | -3.41692793461700  | 10.58117846719501 | 15.47056663439400 |
| H | -4.13178464235043  | 10.26104586322758 | 16.23416742710478 |
| C | -2.52137113618297  | 11.62280634204118 | 15.74188400453837 |
| H | -2.53312540283970  | 12.12410205430380 | 16.71340072611971 |
| C | -1.60956722481008  | 12.01795093080010 | 14.75591254085502 |
| H | -0.91151183264982  | 12.83641435037130 | 14.95381958796856 |
| C | -9.46154997171694  | 9.95766736615071  | 7.16612380049186  |
| H | -10.49211562437712 | 10.23561867149643 | 6.92712731723869  |
| C | -8.39649614721044  | 10.58641517731262 | 6.51012290239267  |
| H | -8.59561416371807  | 11.36028804257729 | 5.76326254310600  |
| H | 3.58004665792328   | 3.95854333478338  | 12.54941941091483 |
| H | 5.69973582546448   | 4.62786121133084  | 11.41473782379840 |

|   |                    |                  |                   |
|---|--------------------|------------------|-------------------|
| C | 0.48829213794867   | 6.39911532434432 | 8.49305903506784  |
| C | 0.44203727822155   | 5.59783896838431 | 6.37743845009772  |
| H | 0.66277237531502   | 5.08009943385125 | 5.44715567609049  |
| C | 1.17151219727156   | 5.57007154760362 | 7.54769630734985  |
| H | 2.09649883634447   | 5.03130188156716 | 7.73901166873244  |
| H | 1.81131213805939   | 7.66067405465194 | 12.33989279642218 |
| C | 0.95831849820931   | 6.68674375863256 | 9.78804846137213  |
| C | 2.26244315850727   | 6.10562074952635 | 10.21662099238833 |
| C | 2.33294371056524   | 5.19396088071452 | 11.28795683333521 |
| H | 1.40844879475988   | 4.90007308714815 | 11.79143518350259 |
| C | 3.55496583182110   | 4.66623648369801 | 11.71581628016181 |
| C | 4.74407241101440   | 5.03912112730116 | 11.07740097340991 |
| C | 4.69373628992992   | 5.94032987771794 | 10.00642710969469 |
| H | 5.61403358759762   | 6.24780096537889 | 9.50095908314790  |
| C | 3.46828809451991   | 6.46433807097445 | 9.58351121845763  |
| H | 3.43606909182290   | 7.17296402827541 | 8.75228058281242  |
| H | -10.01227059666773 | 8.47752842063743 | 8.65029947491599  |

d)  $^3\mathbf{1}^-$

No imaginary frequency.

|    |                   |                  |                   |
|----|-------------------|------------------|-------------------|
| Fe | -2.13372515891989 | 7.94597946315546 | 8.87083475833961  |
| N  | -3.60028388477033 | 8.93943211794929 | 9.84315479400113  |
| N  | -3.29419560212478 | 7.80838414860672 | 7.21974366071770  |
| N  | -0.68611340155910 | 6.89480595081494 | 7.92813216208546  |
| N  | -0.95798697905956 | 8.11979166097219 | 10.50292859087485 |
| C  | -3.52403702216033 | 9.55691302238826 | 11.09562961746980 |
| C  | -4.88363362490607 | 9.20647941251328 | 9.36475093756581  |
| C  | -4.60790018932129 | 8.26057816382963 | 7.08053459585894  |
| C  | -2.93957050290333 | 7.28078558983013 | 5.97424268725984  |
| C  | -0.70648007256524 | 6.41712893625592 | 6.61754810049552  |
| C  | 0.29654138959254  | 7.53969891654213 | 10.69324238370160 |

|   |                   |                   |                   |
|---|-------------------|-------------------|-------------------|
| C | -1.20090661898652 | 8.88492957717786  | 11.64715048018658 |
| C | -4.76229852765657 | 10.21107023951670 | 11.38859876386890 |
| H | -4.97421383708503 | 10.78278347736556 | 12.28874314849059 |
| C | -5.60868288672761 | 9.98135484458260  | 10.32340640138807 |
| H | -6.62604695908513 | 10.34459508971845 | 10.19657213208917 |
| C | -5.06755968976070 | 8.01402591273192  | 5.74743052320447  |
| H | -6.05827358090122 | 8.25241850656113  | 5.36806687295748  |
| C | -4.02506202891967 | 7.43589743103914  | 5.05470276370520  |
| H | -4.01684936884539 | 7.12715847964232  | 4.01217918187770  |
| C | 0.84395171017171  | 7.96202177777458  | 11.94525806191817 |
| C | -0.08249015151547 | 8.79397849392952  | 12.53705259237627 |
| H | -0.00629560265405 | 9.27800489275709  | 13.50722382567379 |
| C | -5.37862291225780 | 8.87279453049999  | 8.08735270343494  |
| C | -1.72066717195313 | 6.65095616888242  | 5.66912457278743  |
| C | -2.39584827508385 | 9.57030018514661  | 11.93772842948256 |
| C | -6.78509606322509 | 9.25332243741976  | 7.76572531894778  |
| C | -7.87038526368996 | 8.63444793625599  | 8.41508576194492  |
| H | -7.66614768931208 | 7.86366330598391  | 9.16284407923195  |
| C | -9.19076273974752 | 8.98861668220500  | 8.11830982191116  |
| C | -7.07423881143696 | 10.24673741396118 | 6.81032982103098  |
| H | -6.24603607455480 | 10.74763834557153 | 6.30362750594530  |
| C | -1.48115571363306 | 6.16202661716123  | 4.28127213207244  |
| C | -0.41470851898543 | 6.68421040002286  | 3.52351390862625  |
| H | 0.20426681972531  | 7.47127619322372  | 3.96105032309908  |
| C | -0.13366990956273 | 6.20610846304351  | 2.24072072637846  |
| H | 0.70051261768502  | 6.62897165186894  | 1.67373743648638  |
| C | -0.91986374980649 | 5.19187813989563  | 1.68075139860985  |
| H | -0.69241252218642 | 4.80641623478987  | 0.68291670332533  |
| C | -1.99375614962200 | 4.67120743459649  | 2.41227863557785  |
| H | -2.61470429726962 | 3.87848436420636  | 1.98507945467918  |
| C | -2.26833008843120 | 5.15106047595592  | 3.69750384430597  |
| H | -3.09576411812327 | 4.72627696282392  | 4.27070887287196  |
| C | -2.47384008447639 | 10.29748659388224 | 13.23749186825228 |

|   |                    |                   |                   |
|---|--------------------|-------------------|-------------------|
| C | -3.38834241420597  | 9.91479580417353  | 14.23895522578210 |
| H | -4.07370502483369  | 9.08728903661042  | 14.04136016640398 |
| C | -1.59987242066910  | 11.36502085613823 | 13.52327197893168 |
| H | -0.88975485830904  | 11.68353686767771 | 12.75613153618189 |
| C | -3.42086453591876  | 10.56374829879118 | 15.47691329568133 |
| H | -4.13379826509709  | 10.23924589906519 | 16.24044552672712 |
| C | -2.52946286252559  | 11.60859215425012 | 15.74954863871389 |
| H | -2.54255735397305  | 12.10782236028905 | 16.72211338166882 |
| C | -1.62030478491923  | 12.00981343112051 | 14.76367282683644 |
| H | -0.92555977866152  | 12.83079727696146 | 14.96274372046188 |
| C | -9.45883846617508  | 9.97097346805595  | 7.15663404397313  |
| H | -10.48871918222076 | 10.25019513906571 | 6.91616025998830  |
| C | -8.39211044269967  | 10.60012686809333 | 6.50384725934133  |
| H | -8.58929394614821  | 11.37536925954121 | 5.75790731656562  |
| H | 3.60005639609847   | 3.96514573829701  | 12.53924316145819 |
| H | 5.71471273028424   | 4.64900015650778  | 11.40491955445349 |
| C | 0.48839097077644   | 6.39730752419193  | 8.49548314029152  |
| C | 0.43691253517210   | 5.58890067956477  | 6.38333198455775  |
| H | 0.65619473841271   | 5.06822799639082  | 5.45422838184893  |
| C | 1.16918098546714   | 5.56458842597989  | 7.55282247427174  |
| H | 2.09424991278957   | 5.02593766337702  | 7.74454309848363  |
| H | 1.81531610487948   | 7.66936059937344  | 12.33720662847147 |
| C | 0.96251783098424   | 6.68971365932281  | 9.78885263928222  |
| C | 2.26965346624878   | 6.11327875590352  | 10.21517089140360 |
| C | 2.34511525301780   | 5.19848252188789  | 11.28310617335588 |
| H | 1.42249315110100   | 4.89873429302158  | 11.78656205628262 |
| C | 3.57029267085498   | 4.67539566974403  | 11.70799369865273 |
| C | 4.75672355274008   | 5.05663705466410  | 11.06974679655729 |
| C | 4.70115712453897   | 5.96115194390056  | 10.00181695513037 |
| H | 5.61948321355071   | 6.27451851541947  | 9.49643645742468  |
| C | 3.47262596592293   | 6.48021230506183  | 9.58172518457347  |
| H | 3.43545553961529   | 7.19093319792223  | 8.75246486770830  |
| H | -10.01362452404776 | 8.48856674063028  | 8.63705541088321  |

e)  $^5\text{I}^{2-}$

No imaginary frequency.

|    |                   |                   |                   |
|----|-------------------|-------------------|-------------------|
| Fe | -2.13394599289031 | 7.94497618198545  | 8.86822230068584  |
| N  | -3.60327471330404 | 8.93583276953402  | 9.84399247424869  |
| N  | -3.30503529531795 | 7.79157399785544  | 7.22105785993637  |
| N  | -0.67707245487981 | 6.90740880270423  | 7.91959514186265  |
| N  | -0.95445469413761 | 8.12004317794235  | 10.50082784196006 |
| C  | -3.51087706113340 | 9.58569612483925  | 11.07582913121045 |
| C  | -4.89526419464329 | 9.17922284228713  | 9.37385895703915  |
| C  | -4.63232481310563 | 8.21007744293672  | 7.09854259627960  |
| C  | -2.94128985445618 | 7.29025083848800  | 5.97093797003303  |
| C  | -0.68662609599107 | 6.46199802702227  | 6.60092769837894  |
| C  | 0.28347634978558  | 7.50760454785869  | 10.70324158814927 |
| C  | -1.18792982242975 | 8.90215463072817  | 11.63111249924125 |
| C  | -4.74870856320196 | 10.24274392816169 | 11.36454882587208 |
| H  | -4.95161472475832 | 10.84093517824830 | 12.24935190791593 |
| C  | -5.61204135818096 | 9.97420849532800  | 10.32075122925415 |
| H  | -6.63356748997770 | 10.32690027117854 | 10.19894068305318 |
| C  | -5.09547642025603 | 7.96048502336115  | 5.76883589023138  |
| H  | -6.09501250614174 | 8.17327872173397  | 5.39801967684873  |
| C  | -4.03754874924177 | 7.42483944693177  | 5.06197539879695  |
| H  | -4.02731563016046 | 7.13312175351076  | 4.01469621130148  |
| C  | 0.82869917394031  | 7.92135279835043  | 11.95717041169643 |
| C  | -0.08055462947483 | 8.78818431511048  | 12.53062319664123 |
| H  | 0.00044193800522  | 9.27944249578829  | 13.49686722825149 |
| C  | -5.40225694995970 | 8.81057368975497  | 8.11230415415074  |
| C  | -1.70244085545561 | 6.70096125903430  | 5.65189193211367  |
| C  | -2.37346200441696 | 9.61602337339125  | 11.90843990787847 |
| C  | -6.81797012687970 | 9.16739192127806  | 7.80411478960482  |
| C  | -7.88689228667347 | 8.53758029577017  | 8.46954575654227  |

|   |                    |                   |                   |
|---|--------------------|-------------------|-------------------|
| H | -7.66398162238664  | 7.77306168368947  | 9.21850736785565  |
| C | -9.21530943850929  | 8.87371870494940  | 8.18724209115429  |
| C | -7.13144453896100  | 10.15331048845192 | 6.84842287740965  |
| H | -6.31579980500766  | 10.66296344348602 | 6.33031137954316  |
| C | -1.44930198450434  | 6.24286586895082  | 4.25759827420608  |
| C | -0.37078605639500  | 6.77616221773878  | 3.52288443862104  |
| H | 0.24473336528265   | 7.55241784750443  | 3.98395067368331  |
| C | -0.07349288403055  | 6.32365510225154  | 2.23473284108618  |
| H | 0.76960988445441   | 6.75612093073616  | 1.68839002490618  |
| C | -0.85524237825733  | 5.32448717996822  | 1.64194979885032  |
| H | -0.61496684571872  | 4.95816208559543  | 0.63992001017114  |
| C | -1.94040604804541  | 4.79283076310702  | 2.34888247599250  |
| H | -2.55759455543731  | 4.01033491112263  | 1.89792562371338  |
| C | -2.23118483665669  | 5.24667093012550  | 3.63963839165811  |
| H | -3.06600757641518  | 4.80957601623016  | 4.19228399244043  |
| C | -2.43557292987489  | 10.37125862327601 | 13.19150842477677 |
| C | -3.36778300392603  | 10.04186685343330 | 14.19715624636125 |
| H | -4.07826698909444  | 9.23229615367409  | 14.01509459092422 |
| C | -1.52710833598604  | 11.41477744959474 | 13.46353724083814 |
| H | -0.80226073517018  | 11.69439198173474 | 12.69499420821252 |
| C | -3.38486957879463  | 10.71687394976140 | 15.42124245524067 |
| H | -4.11162647654782  | 10.43054303877298 | 16.18717264682427 |
| C | -2.46078826792821  | 11.73715260378127 | 15.67857929976685 |
| H | -2.46202183702009  | 12.25626493346461 | 16.64075387281715 |
| C | -1.53278461858338  | 12.08583227509659 | 14.68998782108411 |
| H | -0.81178600941356  | 12.88707704401773 | 14.87606906784215 |
| C | -9.50759791695473  | 9.84874657786446  | 7.22523853948447  |
| H | -10.54386819752922 | 10.11386625205365 | 6.99667428565656  |
| C | -8.45719661044460  | 10.48900929807234 | 6.55692941842357  |
| H | -8.67326140288879  | 11.25915430270105 | 5.81095795085742  |
| H | 3.47276856059898   | 3.82810156731150  | 12.55013900854543 |
| H | 5.62385313719902   | 4.50283419741149  | 11.47862739800418 |
| C | 0.48603926233082   | 6.38900396863178  | 8.49444716604349  |



|   |                    |                  |                   |
|---|--------------------|------------------|-------------------|
| C | 0.45899435455572   | 5.63838284004911 | 6.36177614935414  |
| H | 0.68846258059610   | 5.13915865592728 | 5.42341312911022  |
| C | 1.17576772149708   | 5.57790396789250 | 7.54095675185166  |
| H | 2.09650598649701   | 5.03142054550389 | 7.73041607974186  |
| H | 1.78812190469546   | 7.60558802665093 | 12.36011872929751 |
| C | 0.94076851640495   | 6.64989424314834 | 9.80001523290662  |
| C | 2.22930266300959   | 6.04265320619519 | 10.24050464239862 |
| C | 2.26641327886381   | 5.10562534196904 | 11.29083654285851 |
| H | 1.32787621018349   | 4.80995437195346 | 11.76675338222104 |
| C | 3.47347614345209   | 4.55533631589525 | 11.73315085852659 |
| C | 4.67984530055774   | 4.93123741548966 | 11.13005952581320 |
| C | 4.66248129469854   | 5.85776741283394 | 10.07983859201545 |
| H | 5.59675293769093   | 6.16754491539183 | 9.60208324455614  |
| C | 3.45183643892063   | 6.40426621524136 | 9.64266562541103  |
| H | 3.44496350680134   | 7.13297125703046 | 8.82835971548732  |
| H | -10.02554176703195 | 8.36556047720033 | 8.71777372373580  |

f) <sup>1</sup>TS1

One imaginary frequency of  $-227\text{ cm}^{-1}$ .

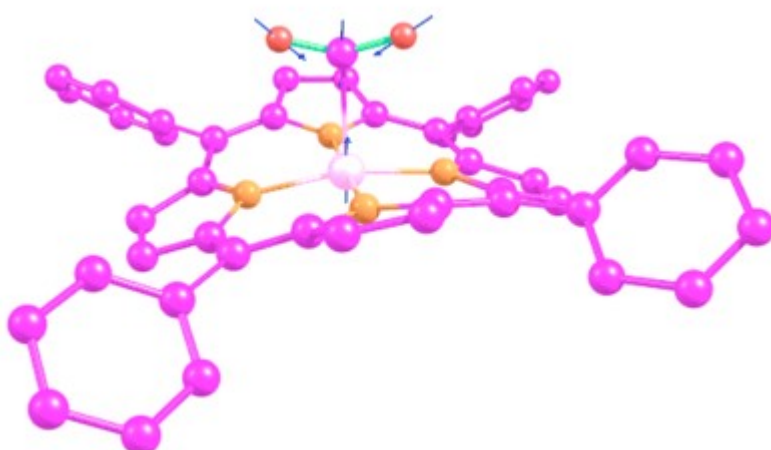

**Figure S17:** Normal mode of vibration associated with the imaginary frequency of  $-227\text{ cm}^{-1}$  in <sup>1</sup>TS1. Blue arrows represent atom displacement vectors. For clarity, all hydrogens are omitted.

|    |              |              |              |
|----|--------------|--------------|--------------|
| Fe | -2.411165000 | 7.973512000  | 8.569828000  |
| N  | -3.966504000 | 8.879258000  | 9.376227000  |
| N  | -3.348200000 | 7.869473000  | 6.842731000  |
| N  | -1.092220000 | 6.625218000  | 7.944368000  |
| N  | -1.425018000 | 8.153376000  | 10.264678000 |
| C  | -4.153054000 | 9.198592000  | 10.721308000 |
| C  | -5.162204000 | 9.195160000  | 8.734613000  |
| C  | -4.418520000 | 8.675735000  | 6.445753000  |
| C  | -2.852821000 | 7.285479000  | 5.673941000  |
| C  | -1.162127000 | 5.873178000  | 6.772569000  |
| C  | -0.104140000 | 7.758008000  | 10.496213000 |
| C  | -1.790034000 | 8.933099000  | 11.364393000 |
| C  | -5.528201000 | 9.539934000  | 10.942006000 |
| H  | -5.974599000 | 9.770035000  | 11.906063000 |
| C  | -6.146916000 | 9.554548000  | 9.711122000  |
| H  | -7.182501000 | 9.806484000  | 9.493143000  |
| C  | -4.481604000 | 8.714450000  | 5.015390000  |
| H  | -5.183802000 | 9.305963000  | 4.432406000  |
| C  | -3.518411000 | 7.846513000  | 4.539618000  |
| H  | -3.290453000 | 7.605023000  | 3.503142000  |
| C  | 0.403454000  | 8.445052000  | 11.645704000 |
| C  | -0.642273000 | 9.161572000  | 12.189618000 |
| H  | -0.623980000 | 9.774811000  | 13.087372000 |
| C  | -5.340815000 | 9.247693000  | 7.338311000  |
| C  | -1.917843000 | 6.234991000  | 5.642851000  |
| C  | -3.110921000 | 9.321609000  | 11.660908000 |
| C  | -6.552452000 | 9.927614000  | 6.805985000  |
| C  | -7.422264000 | 9.294925000  | 5.894697000  |
| H  | -7.202325000 | 8.274656000  | 5.573296000  |
| C  | -8.559909000 | 9.943657000  | 5.405227000  |
| C  | -6.874339000 | 11.241093000 | 7.208347000  |
| H  | -6.208005000 | 11.758230000 | 7.902510000  |

|   |              |              |              |
|---|--------------|--------------|--------------|
| C | -1.727884000 | 5.471826000  | 4.379082000  |
| C | -0.452404000 | 5.303509000  | 3.802987000  |
| H | 0.405688000  | 5.792161000  | 4.269322000  |
| C | -0.272115000 | 4.524662000  | 2.656315000  |
| H | 0.729451000  | 4.400625000  | 2.234300000  |
| C | -1.367388000 | 3.905024000  | 2.044015000  |
| H | -1.225372000 | 3.292989000  | 1.149280000  |
| C | -2.645762000 | 4.082562000  | 2.586290000  |
| H | -3.509760000 | 3.603819000  | 2.116777000  |
| C | -2.821405000 | 4.855030000  | 3.737472000  |
| H | -3.819080000 | 4.971789000  | 4.167012000  |
| C | -3.410146000 | 9.863240000  | 13.014553000 |
| C | -3.006490000 | 9.166941000  | 14.173487000 |
| H | -2.460772000 | 8.227713000  | 14.060299000 |
| C | -4.113772000 | 11.071568000 | 13.198255000 |
| H | -4.424541000 | 11.645596000 | 12.323234000 |
| C | -3.301876000 | 9.644600000  | 15.452475000 |
| H | -2.975906000 | 9.075383000  | 16.327712000 |
| C | -4.018493000 | 10.836374000 | 15.612975000 |
| H | -4.262967000 | 11.210952000 | 16.610905000 |
| C | -4.420949000 | 11.546495000 | 14.476329000 |
| H | -4.972392000 | 12.484649000 | 14.586048000 |
| C | -8.866255000 | 11.244150000 | 5.822482000  |
| H | -9.756253000 | 11.752290000 | 5.441612000  |
| C | -8.017110000 | 11.887751000 | 6.730733000  |
| H | -8.245631000 | 12.903192000 | 7.067941000  |
| H | 3.414464000  | 5.013725000  | 13.090610000 |
| H | 5.393407000  | 5.071751000  | 11.573197000 |
| C | -0.015640000 | 6.114441000  | 8.663427000  |
| C | -0.233177000 | 4.781485000  | 6.846911000  |
| H | -0.112482000 | 4.004826000  | 6.095219000  |
| C | 0.486143000  | 4.939958000  | 8.011378000  |
| H | 1.292933000  | 4.312086000  | 8.382624000  |

|   |              |              |              |
|---|--------------|--------------|--------------|
| H | 1.418914000  | 8.369570000  | 12.027967000 |
| C | 0.548426000  | 6.725691000  | 9.797959000  |
| C | 1.872269000  | 6.247530000  | 10.284066000 |
| C | 2.051436000  | 5.787289000  | 11.603887000 |
| H | 1.189319000  | 5.748884000  | 12.273066000 |
| C | 3.304486000  | 5.372228000  | 12.063180000 |
| C | 4.414511000  | 5.398125000  | 11.211356000 |
| C | 4.252252000  | 5.834281000  | 9.891321000  |
| H | 5.110116000  | 5.861750000  | 9.213714000  |
| C | 2.998443000  | 6.252878000  | 9.436676000  |
| H | 2.882441000  | 6.610234000  | 8.410505000  |
| H | -9.218927000 | 9.425371000  | 4.702994000  |
| C | -1.495826000 | 9.912826000  | 7.584272000  |
| O | -2.291694000 | 10.789892000 | 7.722109000  |
| O | -0.427296000 | 9.573846000  | 7.171276000  |

g)  $^1A$

One imaginary frequency of  $-16\text{ cm}^{-1}$ .

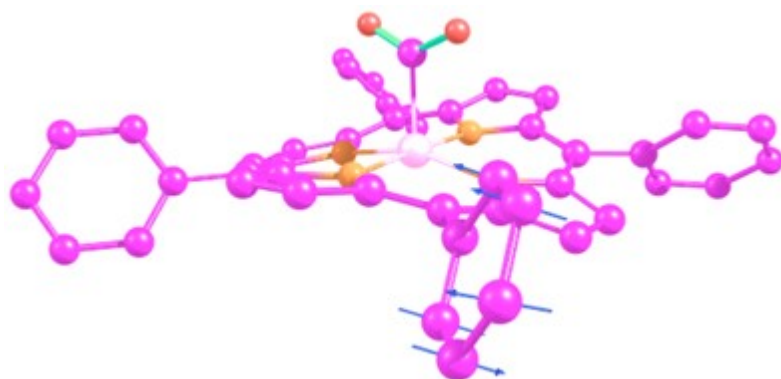

**Figure S18:** Normal mode of vibration associated with the imaginary frequency of  $-16\text{ cm}^{-1}$  in  $^1A$ . Blue arrows represent atom displacement vectors. For clarity, hydrogens are omitted.

|    |                   |                  |                  |
|----|-------------------|------------------|------------------|
| Fe | -2.32653192316301 | 8.05268331501034 | 8.55516160410301 |
| N  | -3.85625451076375 | 9.02662595955405 | 9.36591926387377 |
| N  | -3.27293793825177 | 8.04322098623113 | 6.78958967296727 |

|   |                   |                   |                   |
|---|-------------------|-------------------|-------------------|
| N | -1.18890352228204 | 6.52935630296807  | 7.93302969663149  |
| N | -1.43177830679122 | 7.96919914875901  | 10.34476099316225 |
| C | -3.99323327300529 | 9.41329393155318  | 10.69491811723284 |
| C | -4.97579531734173 | 9.51775765651599  | 8.70586446811783  |
| C | -4.30025746487031 | 8.88939901198373  | 6.41147487294073  |
| C | -2.83317018408663 | 7.43377209165763  | 5.62690285716463  |
| C | -1.23656883308747 | 5.88899214980528  | 6.70262432240157  |
| C | -0.22758279531647 | 7.35199946244787  | 10.63576111907266 |
| C | -1.76331932699288 | 8.69316585668283  | 11.47464462706585 |
| C | -5.29164468051422 | 10.02507175341145 | 10.89242156896297 |
| H | -5.68039089881501 | 10.37529479626999 | 11.84626802095160 |
| C | -5.89496555446826 | 10.08942505154947 | 9.67335862615965  |
| H | -6.87493222061627 | 10.49899350265372 | 9.44110679457853  |
| C | -4.42108293412981 | 8.90601497233009  | 4.98483480938201  |
| H | -5.12085592370228 | 9.51279441499852  | 4.41545797434500  |
| C | -3.50361856346105 | 7.99366733193816  | 4.49549046085435  |
| H | -3.31627257879936 | 7.72173533635314  | 3.45878735348993  |
| C | 0.25599231913544  | 7.77944822684850  | 11.91229130392246 |
| C | -0.70641936556603 | 8.61906647342322  | 12.43899324751487 |
| H | -0.69681112280108 | 9.11708339122336  | 13.40560464092275 |
| C | -5.16814318437059 | 9.54379667966290  | 7.32520351629249  |
| C | -1.93285026004709 | 6.33871540010821  | 5.58490983044476  |
| C | -3.01462225520574 | 9.32531590845887  | 11.67837017317570 |
| C | -6.35987992374478 | 10.25946820052721 | 6.78291597136265  |
| C | -7.30412493712480 | 9.59519059840957  | 5.97515025780826  |
| H | -7.15091585552591 | 8.54035617063345  | 5.73688910310693  |
| C | -8.4312806627342  | 10.25875343601086 | 5.48294072946684  |
| C | -6.58623594921588 | 11.61908996017475 | 7.07316750999538  |
| H | -5.85900209748607 | 12.15937666519162 | 7.68348347468829  |
| C | -1.73993401719660 | 5.61242612131791  | 4.29658499285320  |
| C | -0.46413305352085 | 5.50259224160899  | 3.71177312154789  |
| H | 0.37966711878847  | 6.00931576803896  | 4.18557893882689  |
| C | -0.26427342901175 | 4.74859110921193  | 2.55144615486244  |

|   |                   |                   |                   |
|---|-------------------|-------------------|-------------------|
| H | 0.73841846410496  | 4.66454154932502  | 2.12290047407285  |
| C | -1.34203398486656 | 4.10061376920270  | 1.93900343812399  |
| H | -1.18519254138937 | 3.50708220908021  | 1.03439103417899  |
| C | -2.62199444556449 | 4.22194170049026  | 2.49309579136923  |
| H | -3.47101327555645 | 3.71838561122762  | 2.02276837898089  |
| C | -2.81745831236350 | 4.97070065406357  | 3.65688749623436  |
| H | -3.81505560457457 | 5.04423479873574  | 4.09634673738083  |
| C | -3.26688780955303 | 9.92030934011067  | 13.02505538545541 |
| C | -3.32627376052389 | 9.10694018109865  | 14.17160734631073 |
| H | -3.23104631588245 | 8.02445230384475  | 14.05726040647392 |
| C | -3.39934906075389 | 11.31013448533583 | 13.19122513284513 |
| H | -3.34952006249530 | 11.95640367309889 | 12.31153148348209 |
| C | -3.49371746277759 | 9.66244307725811  | 15.44307544466479 |
| H | -3.53343605659435 | 9.01000509670176  | 16.31952086500482 |
| C | -3.61016699021460 | 11.04918579590233 | 15.59411607798004 |
| H | -3.73531779636931 | 11.48884955999780 | 16.58739494135752 |
| C | -3.56932686055468 | 11.86974780797047 | 14.46209152845478 |
| H | -3.66173181277705 | 12.95387310021989 | 14.57053044888062 |
| C | -8.64677957864303 | 11.60714105805339 | 5.79201915420535  |
| H | -9.52893540440435 | 12.12772160275619 | 5.40980019927779  |
| C | -7.71977746369907 | 12.28259795356498 | 6.59283040188772  |
| H | -7.87905066458206 | 13.33458983999276 | 6.84630358916885  |
| H | 2.56963095809072  | 3.26763628726567  | 12.62817027554726 |
| H | 4.81243744569354  | 3.94030921794344  | 11.76443062129853 |
| C | -0.17879930930234 | 5.89794792962872  | 8.64697771453700  |
| C | -0.34856503373935 | 4.73854870196420  | 6.71371676042910  |
| H | -0.23880997598346 | 4.02324425350445  | 5.90245278947488  |
| C | 0.31529018891403  | 4.75700365232214  | 7.90262321968876  |
| H | 1.07470952770979  | 4.06347708180390  | 8.25771110745024  |
| H | 1.18694248231800  | 7.45603105157346  | 12.37307715064637 |
| C | 0.34981143387709  | 6.32628401988857  | 9.85536487305026  |
| C | 1.57713796090024  | 5.65404738938211  | 10.38058438746919 |
| C | 1.49757436216050  | 4.66028173722982  | 11.37009248005760 |

|   |                   |                   |                   |
|---|-------------------|-------------------|-------------------|
| H | 0.51650405929478  | 4.36673848049288  | 11.75320477160005 |
| C | 2.65272986152639  | 4.04395481505023  | 11.86258749983831 |
| C | 3.91012104954974  | 4.42008692269841  | 11.37552844710330 |
| C | 4.00286968058276  | 5.40956472405858  | 10.38952375294331 |
| H | 4.97905567875275  | 5.71291801458530  | 10.00004798441593 |
| C | 2.84408129781765  | 6.01783383272789  | 9.89504811512882  |
| H | 2.91470422957419  | 6.79028014759537  | 9.12472453386705  |
| H | -9.15144865957452 | 9.71688200232848  | 4.86368568214172  |
| C | -1.23734634860451 | 9.64709812829621  | 7.96546363555629  |
| O | -1.73409102853138 | 10.75015703806171 | 8.21037792857527  |
| O | -0.17622320236627 | 9.34110649704202  | 7.41055753713941  |

h)  $^3A$

No imaginary frequency.

|    |                   |                   |                   |
|----|-------------------|-------------------|-------------------|
| Fe | -2.28283766202117 | 8.06088628131781  | 8.56363448904804  |
| N  | -3.90952542329784 | 9.07914109577848  | 9.42049616141754  |
| N  | -3.39970935189131 | 7.93877426625570  | 6.77662393859393  |
| N  | -1.08772757420510 | 6.50318365296516  | 7.88679993537160  |
| N  | -1.49713169743520 | 7.78009442601406  | 10.48676986496510 |
| C  | -3.94021965521566 | 9.57721664480448  | 10.71785755816325 |
| C  | -4.96232796375830 | 9.64622993450869  | 8.73907788856973  |
| C  | -4.54860506457422 | 8.62768388611622  | 6.47569912583006  |
| C  | -3.04584397435414 | 7.21856394875011  | 5.64735272168393  |
| C  | -1.05724051545035 | 6.00513894295883  | 6.59089441927298  |
| C  | -0.37172906235277 | 7.06005307282653  | 10.79794766048451 |
| C  | -1.88415996326748 | 8.45620732434368  | 11.63194958057668 |
| C  | -5.05555345444666 | 10.49521603440714 | 10.84333461840478 |
| H  | -5.31890040028252 | 11.04692551489830 | 11.74292126976566 |
| C  | -5.68638500082952 | 10.53767676580813 | 9.63253232174972  |
| H  | -6.55515053309256 | 11.13246820291806 | 9.35980906690250  |
| C  | -4.93090403819273 | 8.35335562674508  | 5.11504633163506  |

|   |                   |                   |                   |
|---|-------------------|-------------------|-------------------|
| H | -5.80693369768595 | 8.75267859844153  | 4.60914562761230  |
| C | -3.98744195509799 | 7.48464662336404  | 4.59976277709070  |
| H | -3.96071737529980 | 7.06064843389025  | 3.59824880038963  |
| C | -0.01735596067799 | 7.29465757622080  | 12.17405613707103 |
| C | -0.96662024353443 | 8.15532813806825  | 12.69203183217516 |
| H | -1.02466314216524 | 8.53702568789306  | 13.70922286312918 |
| C | -5.27817812906403 | 9.45311271562519  | 7.38283568333043  |
| C | -1.93434556452222 | 6.33965570429429  | 5.55464430592432  |
| C | -3.02316037002741 | 9.29675944232574  | 11.73724081525309 |
| C | -6.49063872449461 | 10.13931832601754 | 6.84643638032500  |
| C | -7.77803171830505 | 9.78601591014847  | 7.29071071822185  |
| H | -7.88148087096831 | 8.99962321993982  | 8.04261778488686  |
| C | -8.91697581194407 | 10.41916792098203 | 6.78280266117118  |
| C | -6.38226198386694 | 11.15135128479959 | 5.87490661831094  |
| H | -5.38970517444862 | 11.44238805003933 | 5.52114647968657  |
| C | -1.66501353037411 | 5.72224658421012  | 4.21844960747372  |
| C | -0.55736564043117 | 6.14096579975988  | 3.46163088353463  |
| H | 0.08298459247655  | 6.93429534584877  | 3.85490924829416  |
| C | -0.26729806357600 | 5.55028801022089  | 2.22787642058742  |
| H | 0.59876907023850  | 5.89010658075720  | 1.65335706199215  |
| C | -1.08405626137706 | 4.52872382190627  | 1.73020937574739  |
| H | -0.85127947417800 | 4.05903640930729  | 0.77063692633857  |
| C | -2.19836725775845 | 4.11183997531197  | 2.46763045023833  |
| H | -2.84331185548416 | 3.31647473495115  | 2.08393573335582  |
| C | -2.48630507317607 | 4.70661521812704  | 3.70097381951282  |
| H | -3.35072889331276 | 4.37386911607967  | 4.28101653953063  |
| C | -3.26812638808095 | 9.94310155807065  | 13.06393512475374 |
| C | -4.36403805050152 | 9.55869789132866  | 13.85528255838217 |
| H | -5.02305391425649 | 8.76355261903920  | 13.49841406724223 |
| C | -2.42392394810376 | 10.96241213132524 | 13.53775387786493 |
| H | -1.56893506171570 | 11.26914767463268 | 12.92992382578802 |
| C | -4.62038132194920 | 10.18628128153924 | 15.07872961380971 |
| H | -5.47775480126295 | 9.87295923087302  | 15.68067772826458 |



|   |                   |                   |                   |
|---|-------------------|-------------------|-------------------|
| C | -3.78106107293751 | 11.21010763669751 | 15.53198581509922 |
| H | -3.98695577533508 | 11.70710101992363 | 16.48387225610609 |
| C | -2.67818698370108 | 11.59386881214319 | 14.75980122112593 |
| H | -2.01646869374277 | 12.39189239994840 | 15.10790649089278 |
| C | -8.79152555184837 | 11.42167566907867 | 5.81356590135460  |
| H | -9.67869444046615 | 11.91837217679026 | 5.41142891601860  |
| C | -7.51733590554466 | 11.78659901731453 | 5.36198144780807  |
| H | -7.40496897465461 | 12.57350081853478 | 4.61082288483078  |
| H | 2.77147659785460  | 3.22153694284143  | 12.57252815005504 |
| H | 4.95794111500694  | 4.04005223122803  | 11.69320993250682 |
| C | -0.02856356001082 | 5.95036913907704  | 8.56650699445265  |
| C | 0.04183115451417  | 5.06553463021800  | 6.47540559399982  |
| H | 0.29382057358559  | 4.49904404039647  | 5.58158422003212  |
| C | 0.67550807262518  | 5.03081469903882  | 7.68537473836380  |
| H | 1.53772245807964  | 4.42925657102237  | 7.96497697927621  |
| H | 0.83292587667303  | 6.85944115583791  | 12.69401542096807 |
| C | 0.33876513670611  | 6.21525393567901  | 9.89589601490585  |
| C | 1.60395740832998  | 5.59856042465274  | 10.39583810909485 |
| C | 1.60112112293020  | 4.57598688959611  | 11.36024862834056 |
| H | 0.64511627311265  | 4.21468321665268  | 11.74801497198641 |
| C | 2.79734220705127  | 4.01892993080427  | 11.82459429816013 |
| C | 4.02382876273413  | 4.47640355690928  | 11.32855815816600 |
| C | 4.04316479353956  | 5.49343304399295  | 10.36614986500749 |
| H | 4.99412200159236  | 5.86300097480770  | 9.97119952363242  |
| C | 2.84441976585440  | 6.04853765426418  | 9.90806661431095  |
| H | 2.85713615841142  | 6.84915217061597  | 9.16384057225244  |
| H | -9.90506408633229 | 10.12055542791805 | 7.14560588090782  |
| C | -0.96117535029501 | 9.62441452939699  | 8.07184058758226  |
| O | -1.60003515289890 | 10.64292316172751 | 7.79044261636553  |
| O | 0.23352107276010  | 9.33582453013427  | 8.13866007167016  |

i) <sup>5</sup>A

No imaginary frequency.

|    |                   |                   |                   |
|----|-------------------|-------------------|-------------------|
| Fe | -2.44925297143453 | 7.83354334753761  | 8.65107863134254  |
| N  | -3.75601249699205 | 9.18450877620540  | 9.38962923413613  |
| N  | -3.31399476577234 | 8.01239288313910  | 6.83889653313988  |
| N  | -1.15828406420659 | 6.46299112081167  | 7.92115556173082  |
| N  | -1.55932408673422 | 7.68586381911249  | 10.45478043621121 |
| C  | -3.78946357931223 | 9.66597248798274  | 10.69794589782506 |
| C  | -4.91987835351378 | 9.65253905356847  | 8.77315582895033  |
| C  | -4.39594289990766 | 8.82397110633395  | 6.49500252439220  |
| C  | -2.81048294637433 | 7.51107774424803  | 5.63684519324768  |
| C  | -1.08706045053076 | 6.01447579392868  | 6.60417151099591  |
| C  | -0.48602544247544 | 6.86228499072501  | 10.79451405325207 |
| C  | -1.73062094936232 | 8.55718993379818  | 11.53235353438617 |
| C  | -5.00567479993364 | 10.37841740858195 | 10.91673547014375 |
| H  | -5.30698448246972 | 10.83574650564380 | 11.85681907883705 |
| C  | -5.71539530539100 | 10.35361621212709 | 9.72948310113296  |
| H  | -6.69240062470595 | 10.79126808624168 | 9.54075752308374  |
| C  | -4.52508865805650 | 8.87216512757525  | 5.07230759719725  |
| H  | -5.26165050736854 | 9.45808012994222  | 4.52803328026876  |
| C  | -3.53461251075876 | 8.06698733628500  | 4.54024360553268  |
| H  | -3.32774721149496 | 7.87112166962983  | 3.49018212973793  |
| C  | 0.05109392390350  | 7.26174034110957  | 12.05428280715533 |
| C  | -0.70622754364849 | 8.32919372611141  | 12.50273588917394 |
| H  | -0.56805877012019 | 8.89677912692811  | 13.41988433708031 |
| C  | -5.23034046599794 | 9.51787700589589  | 7.40016325137137  |
| C  | -1.78340574426197 | 6.55925511372433  | 5.51038504177230  |
| C  | -2.79270943884122 | 9.47208368868658  | 11.67881005460285 |
| C  | -6.45617579077443 | 10.16804503791243 | 6.86494522273737  |
| C  | -7.39220071611919 | 9.43427894635614  | 6.10235047441274  |
| H  | -7.20470381295949 | 8.37454621773506  | 5.91499110371410  |
| C  | -8.54530699441612 | 10.03070478751100 | 5.58611372497992  |
| C  | -6.73711852021958 | 11.53447947034198 | 7.08263711933503  |

|   |                   |                   |                   |
|---|-------------------|-------------------|-------------------|
| H | -6.02298724404998 | 12.13861342833484 | 7.64598930993702  |
| C | -1.44938748755939 | 6.02807179970898  | 4.15861526956043  |
| C | -0.18173434977656 | 6.25737666272087  | 3.59099482895662  |
| H | 0.53623774336240  | 6.87303344299271  | 4.13848606316929  |
| C | 0.16854821150974  | 5.70947311523040  | 2.35345789305470  |
| H | 1.15754339442108  | 5.91038731478031  | 1.93137528893145  |
| C | -0.74331159477174 | 4.91024252676062  | 1.65439228705366  |
| H | -0.46582932555829 | 4.46801805851123  | 0.69352704298602  |
| C | -2.01292438082240 | 4.68086809951230  | 2.19837157082294  |
| H | -2.73316509484173 | 4.05513810003985  | 1.66386051687638  |
| C | -2.36080943695879 | 5.23801233971678  | 3.43313326335867  |
| H | -3.34790465189350 | 5.04294603674685  | 3.86048435329404  |
| C | -2.89911909118766 | 10.23458207968605 | 12.95191354288353 |
| C | -2.99950454163308 | 9.57849492227339  | 14.19576373184902 |
| H | -3.03431138420583 | 8.48678275336904  | 14.21329447423350 |
| C | -2.88811213211725 | 11.64424085615941 | 12.95955406204203 |
| H | -2.81340052981628 | 12.17649514646045 | 12.00780158026043 |
| C | -3.05223984021875 | 10.29408443689132 | 15.39503694976989 |
| H | -3.12255685618890 | 9.75459309816707  | 16.34400085656614 |
| C | -3.02631274143621 | 11.69366122362321 | 15.38243740564123 |
| H | -3.06612712726468 | 12.25757053521791 | 16.31818471915178 |
| C | -2.95341175548340 | 12.36438728534840 | 14.15560573687299 |
| H | -2.93309719958009 | 13.45777087775283 | 14.13074732915683 |
| C | -8.81003520430338 | 11.38456166160048 | 5.82602374589042  |
| H | -9.71431858131163 | 11.85277749733807 | 5.42772352920249  |
| C | -7.89822191820113 | 12.13077218381533 | 6.58188223548694  |
| H | -8.09067797659165 | 13.18943433573265 | 6.77972327435906  |
| H | 1.16975098142312  | 2.59391889488668  | 13.20098594028175 |
| H | 3.46499886241159  | 2.27117644919636  | 12.25448101510680 |
| C | -0.30297982638833 | 5.63596386658092  | 8.65425507372292  |
| C | -0.22418566362493 | 4.87830792144683  | 6.52395620402439  |
| H | -0.00749061335268 | 4.31844608474994  | 5.61716299841515  |
| C | 0.24210165865713  | 4.62714047606794  | 7.80011082810356  |

|   |                   |                   |                   |
|---|-------------------|-------------------|-------------------|
| H | 0.91312341301497  | 3.83129715646023  | 8.11352035875225  |
| H | 0.91429582397404  | 6.80873554527238  | 12.53738185196210 |
| C | 0.03256720462925  | 5.81214114806900  | 10.00947654790778 |
| C | 1.00036106739915  | 4.87164649235960  | 10.63679624495790 |
| C | 0.62456221763283  | 4.10724679105267  | 11.76064582853745 |
| H | -0.37921212743334 | 4.23722668591873  | 12.17248696686582 |
| C | 1.49745352751104  | 3.18216689132994  | 12.33900984320233 |
| C | 2.78055473366955  | 2.99789556353534  | 11.80916497189913 |
| C | 3.17916750546431  | 3.75969461020996  | 10.70439486274231 |
| H | 4.18151512720859  | 3.63085831704261  | 10.28517253346690 |
| C | 2.30355763192266  | 4.68731159500674  | 10.13151663740425 |
| H | 2.62804609412771  | 5.28222633671217  | 9.27435443948070  |
| H | -9.25027489138463 | 9.43007256316867  | 5.00398042150742  |
| C | -0.45192061771453 | 10.34922762074372 | 7.75083464727425  |
| O | -0.61229524642011 | 10.80688329541709 | 8.80487237480845  |
| O | -0.26718078599707 | 9.92345888054801  | 6.68716079632670  |

j) <sup>1</sup>B

No imaginary frequency.

|    |                   |                  |                   |
|----|-------------------|------------------|-------------------|
| Fe | -2.68871830954791 | 8.48319916510937 | 8.62129059912383  |
| N  | -4.31069766549141 | 9.31482875675880 | 9.46317997739052  |
| N  | -3.64574995627189 | 8.44438552844061 | 6.85535593483150  |
| N  | -1.29666231397990 | 7.24606058129588 | 7.86684484991340  |
| N  | -1.86141714662810 | 8.28095751620214 | 10.43771086002186 |
| C  | -4.54177864757531 | 9.53717364463882 | 10.82273424571945 |
| C  | -5.43599125001002 | 9.77397586450916 | 8.81218371509945  |
| C  | -4.75477858138556 | 9.18888975546481 | 6.51024388279032  |
| C  | -3.19451327558352 | 7.86610960576885 | 5.66685982267825  |
| C  | -1.27129565922286 | 6.65418142256171 | 6.60234554290251  |
| C  | -0.58267839963410 | 7.83842928669910 | 10.70261920384725 |
| C  | -2.33160614508907 | 8.81621564516910 | 11.63744523054515 |

|   |                   |                   |                   |
|---|-------------------|-------------------|-------------------|
| C | -5.85991383835029 | 10.06764711632441 | 11.01728164136986 |
| H | -6.30521142107284 | 10.30598616678486 | 11.98058546735455 |
| C | -6.41746805225303 | 10.21880140774397 | 9.77450631222453  |
| H | -7.40731517801070 | 10.59637552373490 | 9.53132361695105  |
| C | -4.94047088811699 | 9.16578828315773  | 5.07760528287843  |
| H | -5.70852240007057 | 9.70650095141174  | 4.53171860042321  |
| C | -3.98386713367791 | 8.32722777641457  | 4.56413749067988  |
| H | -3.82075969832683 | 8.05620308329974  | 3.52349912771911  |
| C | -0.21510062482643 | 8.15785545584712  | 12.06121401340549 |
| C | -1.30696535293672 | 8.74910812046721  | 12.64111934471422 |
| H | -1.40215174291710 | 9.12124645563837  | 13.65851893740268 |
| C | -5.63120073948638 | 9.81523841032348  | 7.41675738411021  |
| C | -2.13296961116463 | 6.96609436360084  | 5.55115792126294  |
| C | -3.60645207656072 | 9.34964015934726  | 11.84366837173367 |
| C | -6.85293558560437 | 10.49077618148518 | 6.89451162945023  |
| C | -7.79196410523831 | 9.80542394326378  | 6.09713564770819  |
| H | -7.61844069326552 | 8.75435462273485  | 5.85562795362274  |
| C | -8.93850941199658 | 10.44285999398722 | 5.61449513447320  |
| C | -7.11735023770918 | 11.84130718154292 | 7.19805006554881  |
| H | -6.40085486256064 | 12.39542171333924 | 7.80934885715013  |
| C | -1.88368528418676 | 6.32161114129512  | 4.22681846441595  |
| C | -0.71453178345578 | 6.60855087495829  | 3.50270448072209  |
| H | -0.00733789068401 | 7.33390190473279  | 3.90241317864939  |
| C | -0.45927002573629 | 5.97987327547674  | 2.28072702592989  |
| H | 0.45221747024217  | 6.22494547101054  | 1.72861152759345  |
| C | -1.36559561397366 | 5.04566315872075  | 1.76636766456325  |
| H | -1.15895629242935 | 4.54513630920819  | 0.81632963123655  |
| C | -2.53832948997381 | 4.75789630622439  | 2.47438531858610  |
| H | -3.25345065624294 | 4.03110748030332  | 2.07926920060207  |
| C | -2.79674641929641 | 5.39636055977290  | 3.69254298150963  |
| H | -3.70978995879069 | 5.16647708304599  | 4.24759960127934  |
| C | -3.96509604599501 | 9.76189470182506  | 13.23417804241995 |
| C | -4.08113603909415 | 8.80244870230057  | 14.25465759913330 |

|   |                    |                   |                   |
|---|--------------------|-------------------|-------------------|
| H | -3.93931612644853  | 7.74705311294365  | 14.00897680512755 |
| C | -4.15766517417061  | 11.11473010144777 | 13.56268167718341 |
| H | -4.06465946022010  | 11.87029090201162 | 12.77894190722995 |
| C | -4.36895186515949  | 9.18444960235953  | 15.56822408700581 |
| H | -4.45689403102140  | 8.42317694668007  | 16.34784569934397 |
| C | -4.54529857896699  | 10.53574939874026 | 15.88509812699666 |
|   |                    |                   |                   |
| H | -4.76691920867250  | 10.83798240999074 | 16.91221906828450 |
| C | -4.44190291163623  | 11.50001887323399 | 14.87665541455308 |
| H | -4.57852716057162  | 12.55804698724905 | 15.11688347881052 |
| C | -9.18554567163924  | 11.78389498997499 | 5.92966354113225  |
| H | -10.08267563255333 | 12.28377430242077 | 5.55461745973945  |
| C | -8.27086532775001  | 12.47776412786377 | 6.73030161812729  |
| H | -8.45634259791109  | 13.52356623282415 | 6.99160040019927  |
| H | 3.18429023482196   | 4.61760877726880  | 12.46278049395778 |
| H | 5.18760654768340   | 5.55481032434228  | 11.31604349432254 |
| C | -0.17931109391081  | 6.77469870560689  | 8.51665072781196  |
| C | -0.16484758976585  | 5.74312093885626  | 6.50586887675706  |
| H | 0.06608092880089   | 5.12588823996039  | 5.64105620765305  |
| C | 0.52468010094628   | 5.82585688966923  | 7.68590254317762  |
| H | 1.41933652660576   | 5.28173272671823  | 7.97828283529782  |
| H | 0.74837688973327   | 7.94614715787306  | 12.51780720023964 |
| C | 0.23490452522137   | 7.12836557806031  | 9.81089605219322  |
| C | 1.59224139393691   | 6.69507910346062  | 10.24715312782304 |
| C | 1.77844855563251   | 5.75954130446575  | 11.28082420070796 |
| H | 0.90223476351019   | 5.34240684988638  | 11.78301992089622 |
| C | 3.06098969202202   | 5.35222521323365  | 11.66210291868769 |
| C | 4.18638817490733   | 5.87676030877124  | 11.01554426087206 |
| C | 4.01696409662119   | 6.80878982459936  | 9.98361648362641  |
| H | 4.88777375496881   | 7.22767649198691  | 9.47138498285856  |
| C | 2.73319983759529   | 7.21088977746625  | 9.60311978199627  |
| H | 2.59670211187431   | 7.93307964895706  | 8.79403248934307  |
| H | -9.64955108703228  | 9.88484277815291  | 4.99874202226525  |

|   |                   |                   |                  |
|---|-------------------|-------------------|------------------|
| C | -1.72338814526970 | 10.18810020842181 | 8.28120292267196 |
| O | -2.40883359529141 | 11.14015762082270 | 7.90490448639397 |
| O | -0.48197122951529 | 10.15649924581993 | 8.46948486982720 |
| H | 0.46302989219112  | 9.52454034031638  | 7.37593472760431 |
| C | 0.82184227620164  | 9.49025594213616  | 5.45033820438269 |
| C | 1.76160579586073  | 9.22108824891604  | 4.43528605616680 |
| C | -0.44077884480851 | 10.00228003131425 | 5.08644098628178 |
| C | 1.45131171546237  | 9.47059820338219  | 3.09632418011467 |
| C | -0.73954008731879 | 10.23930718292102 | 3.74308064886874 |
| C | 0.19866583576981  | 9.98314678265252  | 2.73675017881696 |
| H | 2.73296027776607  | 8.81035323225610  | 4.72328641780910 |
| H | -1.18867717205164 | 10.20637207676220 | 5.85238136687194 |
| H | 2.19636624466368  | 9.25371787054053  | 2.32569490739789 |
| H | -1.72833821128247 | 10.62722414273514 | 3.48219506186228 |
| H | -0.04737046363347 | 10.17553972547726 | 1.68937313116281 |
| O | 1.17832712798866  | 9.24950886649932  | 6.72280256785072 |

k)  $^{13}\text{C}$

One imaginary frequency of  $-2\text{ cm}^{-1}$ .

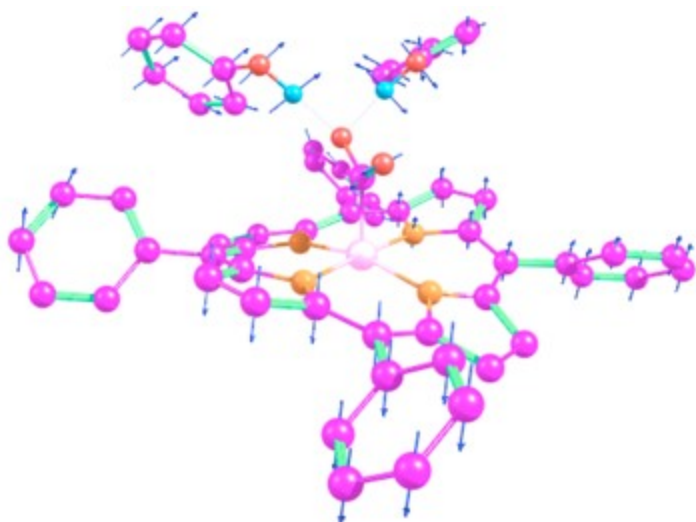

**Figure S19:** Normal mode of vibration associated with the imaginary frequency of  $-2\text{ cm}^{-1}$  in  $^{13}\text{C}$ . Blue arrows represent atom displacement vectors. For clarity, all hydrogens are omitted, except the hydrogens involved in the formation of the  $\text{H}_2\text{O}$  molecule.

|    |                    |                   |                   |
|----|--------------------|-------------------|-------------------|
| Fe | -3.48266755486526  | 8.41060416211967  | 8.07347373079929  |
| N  | -4.99811024170932  | 8.93143934068084  | 9.24654787667734  |
| N  | -4.71999278466925  | 8.30538782327604  | 6.51950594317539  |
| N  | -2.14318632388221  | 7.34930196745166  | 7.07962524863282  |
| N  | -2.28067092904750  | 8.44886549393715  | 9.65990938667089  |
| C  | -4.97182727813796  | 9.11281255396282  | 10.61681802056488 |
| C  | -6.33350400219227  | 8.99525995867636  | 8.88565875721828  |
| C  | -5.99164642524148  | 8.83356323597336  | 6.45236445953513  |
| C  | -4.34969780599206  | 8.03423835181693  | 5.21617469258872  |
| C  | -2.24447008811799  | 6.89108805494794  | 5.78106543841913  |
| C  | -0.94469996899288  | 8.10467812751134  | 9.68129127614556  |
| C  | -2.52650213259182  | 9.08097982218490  | 10.86586539919830 |
| C  | -6.32098279028490  | 9.13567785432028  | 11.14113981627816 |
| H  | -6.59076795212514  | 9.19081371094927  | 12.19296418068861 |
| C  | -7.16324168061825  | 9.06434539729750  | 10.06976391532436 |
| H  | -8.25034313014399  | 9.04840678730899  | 10.08157590896858 |
| C  | -6.38330638024938  | 9.00554733306432  | 5.06924461211739  |
| H  | -7.31622126873690  | 9.44500493987523  | 4.72551881800477  |
| C  | -5.36381072348246  | 8.51391986633101  | 4.30336805658413  |
| H  | -5.30957833365872  | 8.47017247556525  | 3.21813635530317  |
| C  | -0.30507618791954  | 8.66982157436180  | 10.84989865044468 |
| C  | -1.28180900201819  | 9.28552839612380  | 11.57797591544307 |
| H  | -1.16816265054497  | 9.82083635922974  | 12.51709793619549 |
| C  | -6.80831614608678  | 9.08177439260502  | 7.56806813677531  |
| C  | -3.20768668868504  | 7.30907692364442  | 4.85127054140287  |
| C  | -3.80957835953444  | 9.32657684706214  | 11.37716569600182 |
| C  | -8.23510660149716  | 9.45695474835250  | 7.35399886742403  |
| C  | -9.08613242220365  | 8.67605567113882  | 6.54826825607681  |
| H  | -8.69604555201960  | 7.76803823032689  | 6.08389848912171  |
| C  | -10.41911321182260 | 9.04218856226372  | 6.34325555730737  |
| C  | -8.77344380258759  | 10.60944460451996 | 7.96050412676782  |
| H  | -8.12886326311726  | 11.23098065068439 | 8.58560641979171  |



|   |                    |                   |                   |
|---|--------------------|-------------------|-------------------|
| C | -3.00680926301604  | 6.93108383674373  | 3.42200597670776  |
| C | -1.84784092456949  | 7.34270634482234  | 2.73702795656636  |
| H | -1.11755183677607  | 7.96481357199993  | 3.25549645555985  |
| C | -1.62524876595068  | 6.95761287696111  | 1.41229240885876  |
| H | -0.72000825135298  | 7.29320806414889  | 0.89909647106683  |
| C | -2.55413532137496  | 6.14809909419030  | 0.74858365796831  |
| H | -2.37113714505939  | 5.83134995575465  | -0.28187534759537 |
| C | -3.71558637277300  | 5.73959882111437  | 1.41489216000762  |
| H | -4.44632685147778  | 5.10531635170877  | 0.90571237404300  |
| C | -3.94083712676065  | 6.13185700405659  | 2.73821289866063  |
| H | -4.84094914858340  | 5.79913736515881  | 3.26015852822746  |
| C | -3.96491843325632  | 9.78197621302314  | 12.78854665162460 |
| C | -3.35369774695095  | 9.09323934798246  | 13.85431373629015 |
| H | -2.74845553066140  | 8.21014160984831  | 13.64039364073414 |
| C | -4.75540048832584  | 10.90629661383847 | 13.09858905409184 |
| H | -5.23085399860376  | 11.46268939317475 | 12.28854885154413 |
| C | -3.52589262265130  | 9.51092487563162  | 15.17707265640954 |
| H | -3.03965237758850  | 8.95681878345654  | 15.98442516960338 |
| C | -4.32546208241001  | 10.62203042197813 | 15.46768505055368 |
| H | -4.47018250762504  | 10.94753029310439 | 16.50158960231106 |
| C | -4.93986456068306  | 11.31793351202862 | 14.42090889209740 |
| H | -5.56143916260575  | 12.19144531968313 | 14.63528340170329 |
| C | -10.93619409001529 | 10.19267706625245 | 6.94904155604123  |
| H | -11.97645990972478 | 10.48474652284004 | 6.78128672359783  |
| C | -10.10842848954747 | 10.97214039627075 | 7.76505826103733  |
| H | -10.50240711940625 | 11.87132550692298 | 8.24684007117666  |
| H | 2.82914149917104   | 5.13863908517378  | 11.48819099259326 |
| H | 4.67986823880767   | 5.52476159574272  | 9.86325392044142  |
| C | -0.95163406387593  | 6.84115541629144  | 7.56627220891649  |
| C | -1.16475612514848  | 5.97153081314407  | 5.49038731525719  |
| H | -1.02825851858184  | 5.43452534601910  | 4.55516966706962  |
| C | -0.37410294873547  | 5.92701127183119  | 6.60069511477398  |
| H | 0.52867478442209   | 5.34043676893126  | 6.74742784756876  |

|   |                    |                   |                   |
|---|--------------------|-------------------|-------------------|
| H | 0.75664517331135   | 8.61969584603926  | 11.07535721815898 |
| C | -0.32680577433140  | 7.25450148796072  | 8.75246144002437  |
| C | 1.05176160122462   | 6.76913278163223  | 9.04979946165800  |
| C | 1.33643536891901   | 6.09947662642837  | 10.25545896087582 |
| H | 0.52824290874634   | 5.91773709940941  | 10.96705301055798 |
| C | 2.63055856536875   | 5.65889912860908  | 10.54725436549175 |
| C | 3.66863906727290   | 5.87189713747351  | 9.63407966722678  |
| C | 3.39904669399188   | 6.52490072681420  | 8.42624364953002  |
| H | 4.20286971037534   | 6.69898309058705  | 7.70626612894010  |
| C | 2.10549876019068   | 6.97096133017454  | 8.14026302834371  |
| H | 1.90593734522546   | 7.50569705187832  | 7.21045283743372  |
| H | -11.06023511661115 | 8.41947674273528  | 5.71373785130083  |
| C | -2.91619448804926  | 10.13801642946407 | 7.46219417836195  |
| O | -3.69693346274276  | 11.09948884787793 | 7.41223376624911  |
| O | -1.66323130854476  | 10.26655439966143 | 7.10250686744522  |
| C | 0.53218922644061   | 11.74546311733680 | 9.01362357969743  |
| C | 1.07846381560955   | 12.46982295241847 | 10.09287306855097 |
| C | 1.25202677729497   | 10.64557996775473 | 8.50324928656455  |
| C | 2.29966479404172   | 12.09201977186249 | 10.65660951691739 |
| C | 2.47352215540973   | 10.28221748578335 | 9.07176672933388  |
| C | 3.00670796436821   | 10.99156655354178 | 10.15442597380173 |
| H | 0.51424442069802   | 13.31815448548075 | 10.48960223580681 |
| H | 0.82598561234158   | 10.06611495653718 | 7.68395842591279  |
| H | 2.70126913603841   | 12.66325488599028 | 11.49891007613535 |
| H | 3.00803829704679   | 9.41962347806468  | 8.66986454000567  |
| H | 3.95588301312867   | 10.68551477581041 | 10.60218811154734 |
| O | -0.65148732988227  | 12.12993020989221 | 8.51001479330782  |
| H | -1.03517077239683  | 11.41337515721833 | 7.88873697315316  |
| C | -0.00014373675654  | 10.36535165025483 | 4.30204625912777  |
| C | 0.49642757898483   | 10.65811301513455 | 3.01574788196703  |
| C | 0.46038949437252   | 9.20367781442689  | 4.95731734792081  |
| C | 1.43149949254504   | 9.81752027679863  | 2.40847765410684  |
| C | 1.39214229418321   | 8.36865514246744  | 4.33714836492310  |

|   |                   |                   |                  |
|---|-------------------|-------------------|------------------|
| C | 1.89077574922242  | 8.66588770115710  | 3.06264974581087 |
| H | 0.12373771338334  | 11.55093569099079 | 2.50672029554766 |
| H | 0.04858149889947  | 8.95134783845555  | 5.93478934518463 |
| H | 1.80804611620432  | 10.06876812003232 | 1.41223923479290 |
| H | 1.71511247941400  | 7.46299070343996  | 4.85733107132735 |
| H | 2.61758248531975  | 8.00697770738610  | 2.58159389252452 |
| O | -0.89496892512723 | 11.20513160689046 | 4.84678683246132 |
| H | -1.22581445066277 | 10.85714653073198 | 5.74542092081308 |

l) <sup>1</sup>TS2

One imaginary frequency of  $-138\text{ cm}^{-1}$ .

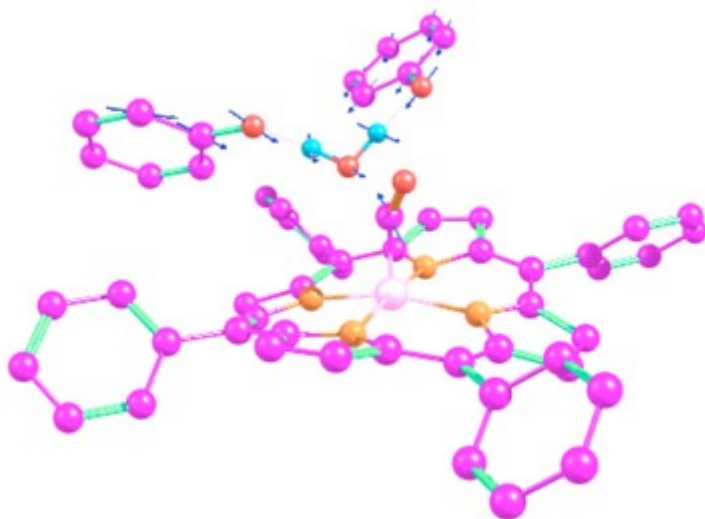

**Figure S20:** Normal mode of vibration associated with the imaginary frequency of  $-138\text{ cm}^{-1}$  in <sup>1</sup>TS2. Blue arrows represent atom displacement vectors. For clarity, all hydrogens are omitted, except the hydrogens involved in the formation of the H<sub>2</sub>O molecule.

|    |              |             |              |
|----|--------------|-------------|--------------|
| Fe | -3.431643000 | 8.663192000 | 8.320104000  |
| N  | -4.949746000 | 9.212397000 | 9.488142000  |
| N  | -4.692029000 | 8.553366000 | 6.760344000  |
| N  | -2.100388000 | 7.582327000 | 7.301470000  |
| N  | -2.242888000 | 8.592154000 | 9.934121000  |
| C  | -4.912147000 | 9.417215000 | 10.852122000 |

|   |               |              |              |
|---|---------------|--------------|--------------|
| C | -6.279175000  | 9.325801000  | 9.123160000  |
| C | -5.950858000  | 9.110767000  | 6.693229000  |
| C | -4.330272000  | 8.265779000  | 5.460205000  |
| C | -2.219329000  | 7.123248000  | 6.006009000  |
| C | -0.914031000  | 8.237185000  | 9.943120000  |
| C | -2.475155000  | 9.233651000  | 11.133911000 |
| C | -6.256544000  | 9.519698000  | 11.372675000 |
| H | -6.521086000  | 9.612564000  | 12.422709000 |
| C | -7.101964000  | 9.459370000  | 10.303685000 |
| H | -8.188112000  | 9.492005000  | 10.314958000 |
| C | -6.346641000  | 9.270233000  | 5.311441000  |
| H | -7.272093000  | 9.723994000  | 4.967450000  |
| C | -5.342161000  | 8.747422000  | 4.548200000  |
| H | -5.293369000  | 8.688575000  | 3.463838000  |
| C | -0.268116000  | 8.760488000  | 11.127652000 |
| C | -1.231915000  | 9.388222000  | 11.859186000 |
| H | -1.108864000  | 9.913971000  | 12.801798000 |
| C | -6.757623000  | 9.396863000  | 7.805871000  |
| C | -3.199071000  | 7.526723000  | 5.088052000  |
| C | -3.745415000  | 9.568578000  | 11.621384000 |
| C | -8.179241000  | 9.788061000  | 7.585468000  |
| C | -9.037242000  | 8.992493000  | 6.801989000  |
| H | -8.657128000  | 8.067802000  | 6.362949000  |
| C | -10.366555000 | 9.365812000  | 6.588850000  |
| C | -8.702504000  | 10.962255000 | 8.161053000  |
| H | -8.051321000  | 11.595632000 | 8.767096000  |
| C | -3.042407000  | 7.107127000  | 3.664925000  |
| C | -1.898735000  | 7.479209000  | 2.934455000  |
| H | -1.141796000  | 8.107682000  | 3.405152000  |
| C | -1.728612000  | 7.049282000  | 1.615396000  |
| H | -0.835235000  | 7.353091000  | 1.063907000  |
| C | -2.691793000  | 6.236896000  | 1.007217000  |
| H | -2.548377000  | 5.887250000  | -0.018873000 |

|   |               |              |              |
|---|---------------|--------------|--------------|
| C | -3.837587000  | 5.867554000  | 1.721704000  |
| H | -4.594161000  | 5.230284000  | 1.255967000  |
| C | -4.012409000  | 6.302851000  | 3.038756000  |
| H | -4.899134000  | 5.999713000  | 3.600185000  |
| C | -3.887019000  | 10.077209000 | 13.015095000 |
| C | -3.338664000  | 9.383222000  | 14.110150000 |
| H | -2.797107000  | 8.451553000  | 13.935140000 |
| C | -4.595997000  | 11.266975000 | 13.271414000 |
| H | -5.020502000  | 11.826840000 | 12.435702000 |
| C | -3.494164000  | 9.860140000  | 15.414496000 |
| H | -3.058045000  | 9.302540000  | 16.247370000 |
| C | -4.211293000  | 11.037492000 | 15.653638000 |
| H | -4.342554000  | 11.409713000 | 16.673326000 |
| C | -4.761843000  | 11.738657000 | 14.575549000 |
| H | -5.318871000  | 12.662875000 | 14.750513000 |
| C | -10.870429000 | 10.537602000 | 7.163720000  |
| H | -11.908101000 | 10.834955000 | 6.989729000  |
| C | -10.034314000 | 11.331676000 | 7.956484000  |
| H | -10.419199000 | 12.247505000 | 8.413170000  |
| H | 3.042625000   | 5.327794000  | 11.506066000 |
| H | 4.827501000   | 5.945475000  | 9.880410000  |
| C | -0.914394000  | 7.064893000  | 7.779599000  |
| C | -1.146359000  | 6.200780000  | 5.705847000  |
| H | -1.021367000  | 5.664009000  | 4.769591000  |
| C | -0.344890000  | 6.156387000  | 6.807056000  |
| H | 0.559993000   | 5.571534000  | 6.947498000  |
| H | 0.790097000   | 8.681239000  | 11.354219000 |
| C | -0.289832000  | 7.436970000  | 8.977917000  |
| C | 1.115275000   | 7.000470000  | 9.218826000  |
| C | 1.464345000   | 6.272218000  | 10.370890000 |
| H | 0.684146000   | 5.994207000  | 11.082845000 |
| C | 2.789883000   | 5.896839000  | 10.607533000 |
| C | 3.791436000   | 6.240533000  | 9.693271000  |

|   |               |              |              |
|---|---------------|--------------|--------------|
| C | 3.456297000   | 6.957394000  | 8.538994000  |
| H | 4.231988000   | 7.233560000  | 7.820505000  |
| C | 2.131566000   | 7.335238000  | 8.304911000  |
| H | 1.879272000   | 7.919030000  | 7.417998000  |
| H | -11.014538000 | 8.732330000  | 5.977587000  |
| C | -2.993520000  | 10.349868000 | 7.840359000  |
| O | -3.368672000  | 11.412865000 | 7.548444000  |
| O | -1.068173000  | 10.447116000 | 7.761733000  |
| C | 0.837493000   | 11.910570000 | 9.949095000  |
| C | 1.425631000   | 12.653220000 | 11.024171000 |
| C | 1.648040000   | 10.854135000 | 9.416161000  |
| C | 2.688586000   | 12.345656000 | 11.533165000 |
| C | 2.905650000   | 10.557104000 | 9.934743000  |
| C | 3.447512000   | 11.290356000 | 11.003022000 |
| H | 0.835335000   | 13.470031000 | 11.453576000 |
| H | 1.233347000   | 10.254246000 | 8.604859000  |
| H | 3.090799000   | 12.941274000 | 12.360424000 |
| H | 3.470065000   | 9.726074000  | 9.499051000  |
| H | 4.430601000   | 11.042039000 | 11.413059000 |
| O | -0.347247000  | 12.183448000 | 9.499966000  |
| H | -0.787575000  | 11.194458000 | 8.411908000  |
| C | -0.056557000  | 10.392366000 | 4.594788000  |
| C | 0.215485000   | 10.700985000 | 3.222084000  |
| C | 0.587629000   | 9.215725000  | 5.100315000  |
| C | 1.047905000   | 9.903666000  | 2.436217000  |
| C | 1.412089000   | 8.424903000  | 4.302347000  |
| C | 1.659926000   | 8.753991000  | 2.960662000  |
| H | -0.268442000  | 11.588163000 | 2.800074000  |
| H | 0.381782000   | 8.926018000  | 6.132128000  |
| H | 1.230498000   | 10.187832000 | 1.393519000  |
| H | 1.857689000   | 7.522698000  | 4.734282000  |
| H | 2.303888000   | 8.129064000  | 2.337025000  |
| O | -0.833528000  | 11.134231000 | 5.318161000  |

H -0.931212000 10.763383000 6.793564000

m) <sup>1</sup>TS3

One imaginary frequency of -1106 cm<sup>-1</sup>.

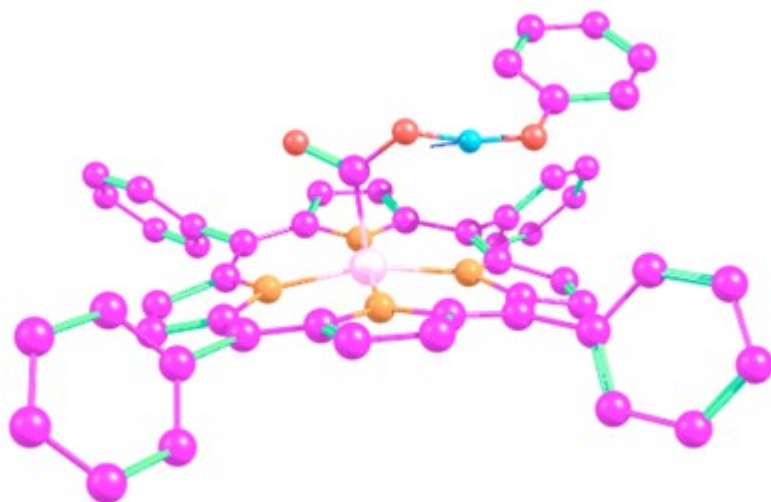

**Figure S21:** Normal mode of vibration associated with the imaginary frequency of -138 cm<sup>-1</sup> in <sup>1</sup>TS3. Blue arrows represent atom displacement vectors. For clarity, all hydrogens are omitted, except the hydrogens involved in the formation of the H<sub>2</sub>O molecule.

|    |              |             |              |
|----|--------------|-------------|--------------|
| Fe | -2.826221000 | 8.491416000 | 8.551360000  |
| N  | -4.449022000 | 9.159271000 | 9.491323000  |
| N  | -3.836445000 | 8.435640000 | 6.829986000  |
| N  | -1.431366000 | 7.308836000 | 7.747203000  |
| N  | -1.871240000 | 8.397518000 | 10.305290000 |
| C  | -4.587071000 | 9.440566000 | 10.836787000 |
| C  | -5.665513000 | 9.469968000 | 8.918953000  |
| C  | -5.029268000 | 9.078809000 | 6.566392000  |
| C  | -3.367929000 | 7.995412000 | 5.606430000  |
| C  | -1.415729000 | 6.777233000 | 6.471866000  |
| C  | -0.586640000 | 7.939039000 | 10.523010000 |
| C  | -2.254720000 | 8.998729000 | 11.488942000 |
| C  | -5.951340000 | 9.822123000 | 11.133402000 |

|   |              |              |              |
|---|--------------|--------------|--------------|
| H | -6.337626000 | 10.056552000 | 12.122988000 |
| C | -6.621500000 | 9.835880000  | 9.945189000  |
| H | -7.667313000 | 10.077781000 | 9.773007000  |
| C | -5.257971000 | 9.138021000  | 5.137450000  |
| H | -6.097916000 | 9.626992000  | 4.651143000  |
| C | -4.231908000 | 8.459623000  | 4.543433000  |
| H | -4.073721000 | 8.281027000  | 3.481728000  |
| C | -0.116495000 | 8.354165000  | 11.825456000 |
| C | -1.151142000 | 9.011985000  | 12.426010000 |
| H | -1.172145000 | 9.457001000  | 13.417727000 |
| C | -5.927064000 | 9.532993000  | 7.542781000  |
| C | -2.260745000 | 7.158551000  | 5.424334000  |
| C | -3.547178000 | 9.453535000  | 11.773942000 |
| C | -7.219545000 | 10.135595000 | 7.102513000  |
| C | -8.136541000 | 9.414146000  | 6.316697000  |
| H | -7.902831000 | 8.385163000  | 6.034401000  |
| C | -9.337247000 | 9.994260000  | 5.896991000  |
| C | -7.546993000 | 11.456220000 | 7.463268000  |
| H | -6.840116000 | 12.031748000 | 8.065621000  |
| C | -1.965895000 | 6.616431000  | 4.065623000  |
| C | -0.749929000 | 6.925242000  | 3.429031000  |
| H | -0.049648000 | 7.604112000  | 3.916619000  |
| C | -0.435133000 | 6.368449000  | 2.186572000  |
| H | 0.512700000  | 6.627481000  | 1.706866000  |
| C | -1.325626000 | 5.487692000  | 1.561859000  |
| H | -1.070109000 | 5.038172000  | 0.598277000  |
| C | -2.544056000 | 5.183161000  | 2.180186000  |
| H | -3.246611000 | 4.496154000  | 1.700621000  |
| C | -2.863088000 | 5.748772000  | 3.419030000  |
| H | -3.808641000 | 5.499238000  | 3.906820000  |
| C | -3.816473000 | 9.988017000  | 13.143055000 |
| C | -3.749342000 | 9.156596000  | 14.274066000 |
| H | -3.533441000 | 8.093907000  | 14.139574000 |



|   |               |              |              |
|---|---------------|--------------|--------------|
| C | -4.102289000  | 11.351293000 | 13.331726000 |
| H | -4.158996000  | 12.007764000 | 12.460010000 |
| C | -3.946669000  | 9.673617000  | 15.558152000 |
| H | -3.888129000  | 9.009932000  | 16.424796000 |
| C | -4.212005000  | 11.035889000 | 15.733776000 |
| H | -4.358930000  | 11.445953000 | 16.736644000 |
| C | -4.291592000  | 11.872298000 | 14.615108000 |
| H | -4.501793000  | 12.937533000 | 14.743375000 |
| C | -9.649600000  | 11.308106000 | 6.263500000  |
| H | -10.587021000 | 11.763594000 | 5.933465000  |
| C | -8.751465000  | 12.034952000 | 7.053241000  |
| H | -8.989815000  | 13.059728000 | 7.351610000  |
| H | 2.928600000   | 4.459716000  | 12.320405000 |
| H | 4.974891000   | 5.257360000  | 11.146800000 |
| C | -0.345910000  | 6.745945000  | 8.389526000  |
| C | -0.362149000  | 5.791521000  | 6.347162000  |
| H | -0.162118000  | 5.193880000  | 5.461533000  |
| C | 0.301736000   | 5.773133000  | 7.537281000  |
| H | 1.151756000   | 5.157747000  | 7.822049000  |
| H | 0.871788000   | 8.151359000  | 12.231421000 |
| C | 0.123708000   | 7.106971000  | 9.653211000  |
| C | 1.457341000   | 6.589767000  | 10.078284000 |
| C | 1.585577000   | 5.665689000  | 11.128275000 |
| H | 0.687772000   | 5.317723000  | 11.645105000 |
| C | 2.843598000   | 5.185892000  | 11.507329000 |
| C | 3.992957000   | 5.633758000  | 10.845691000 |
| C | 3.875883000   | 6.559390000  | 9.800669000  |
| H | 4.768973000   | 6.917882000  | 9.281321000  |
| C | 2.616833000   | 7.030417000  | 9.415683000  |
| H | 2.503437000   | 7.753547000  | 8.603099000  |
| H | -10.035789000 | 9.414611000  | 5.287566000  |
| C | -2.178513000  | 10.271344000 | 8.174593000  |
| O | -2.963081000  | 11.228286000 | 8.147168000  |

|   |              |              |             |
|---|--------------|--------------|-------------|
| O | -0.898737000 | 10.509796000 | 7.995326000 |
| H | -0.069412000 | 9.751879000  | 7.589438000 |
| C | 1.099892000  | 9.360897000  | 5.843718000 |
| C | 2.165333000  | 8.690724000  | 5.180731000 |
| C | 0.276933000  | 10.207707000 | 5.047520000 |
| C | 2.403002000  | 8.874297000  | 3.818263000 |
| C | 0.529815000  | 10.384347000 | 3.686873000 |
| C | 1.594537000  | 9.727422000  | 3.053321000 |
| H | 2.798780000  | 8.020997000  | 5.770149000 |
| H | -0.550927000 | 10.725599000 | 5.534513000 |
| H | 3.230033000  | 8.337655000  | 3.341861000 |
| H | -0.121987000 | 11.045281000 | 3.106564000 |
| H | 1.793687000  | 9.877985000  | 1.989260000 |
| O | 0.913994000  | 9.192424000  | 7.130764000 |

n) <sup>1</sup>D

No imaginary frequency.

|    |                   |                  |                   |
|----|-------------------|------------------|-------------------|
| Fe | -3.06442949786278 | 8.53489442645424 | 8.46065594569298  |
| N  | -4.61984809260560 | 9.17478727211168 | 9.50071621039930  |
| N  | -4.20796201910413 | 8.41897406852064 | 6.83199766030469  |
| N  | -1.67999239537901 | 7.40032599335457 | 7.56068989445008  |
| N  | -1.94706847710126 | 8.58239860930701 | 10.10703178973918 |
| C  | -4.68137431486350 | 9.37115494888704 | 10.86775262745493 |
| C  | -5.90133224118593 | 9.37341413763527 | 9.03326855959072  |
| C  | -5.40964329390229 | 9.07333065916655 | 6.64144838832011  |
| C  | -3.81257354376631 | 7.97889470054096 | 5.58604937538307  |
| C  | -1.78005910101694 | 6.79141701823063 | 6.32048794919220  |
| C  | -0.59791255162897 | 8.29313756429045 | 10.17551917632905 |
| C  | -2.25875821725470 | 9.23284935338436 | 11.28202219040503 |
| C  | -6.05996479104228 | 9.53395227834438 | 11.28011513470283 |
| H  | -6.40623799402513 | 9.62698432010892 | 12.30621364479912 |

|   |                   |                   |                   |
|---|-------------------|-------------------|-------------------|
| C | -6.81343848758821 | 9.54618533374062  | 10.14289106987087 |
| H | -7.89238867288319 | 9.65007386179576  | 10.06005035414451 |
| C | -5.70982329141196 | 9.15192296474005  | 5.22713449889041  |
| H | -6.56502911818295 | 9.65903637783765  | 4.78880377091625  |
| C | -4.72912596676407 | 8.46134150043044  | 4.57545961708404  |
| H | -4.63196180818013 | 8.29258986849534  | 3.50581712091570  |
| C | -0.02538141686350 | 8.89470996583827  | 11.36160384919537 |
| C | -1.05383649309369 | 9.47465656521993  | 12.04692157944948 |
| H | -0.99933074118838 | 10.01543164720794 | 12.98806839760811 |
| C | -6.26023697420877 | 9.48094967604698  | 7.67929830528000  |
| C | -2.72177972972789 | 7.13428817220961  | 5.33941324243136  |
| C | -3.56569385634658 | 9.52457346678940  | 11.70611917123549 |
| C | -7.59970025535439 | 10.05093183683108 | 7.35880624556146  |
| C | -8.51637790263269 | 9.37843866039171  | 6.52945965617939  |
| H | -8.24987813823145 | 8.40373010669881  | 6.11603134749542  |
| C | -9.76478495520472 | 9.93637464447895  | 6.23986674196180  |
| C | -7.98038834306744 | 11.29498043040348 | 7.89961147043932  |
| H | -7.27846269032769 | 11.83343503900426 | 8.54021795733529  |
| C | -2.53614855098708 | 6.59060763202952  | 3.96331751633231  |
| C | -1.36937147617801 | 6.88312990005834  | 3.23445405356314  |
| H | -0.60930902257995 | 7.52636278430500  | 3.68350519295705  |
| C | -1.18330139583099 | 6.37121045303730  | 1.94758448075329  |
| H | -0.27465036943006 | 6.61785111396348  | 1.39215042868117  |
| C | -2.15990012421735 | 5.55215641865418  | 1.37006858953910  |
| H | -2.01025946296651 | 5.14315731510541  | 0.36725055018208  |
| C | -3.32814995863934 | 5.25805522447657  | 2.08241059773404  |
| H | -4.09547542472006 | 4.61858240640854  | 1.63789577379962  |
| C | -3.51589404797185 | 5.77664860819044  | 3.36730361605914  |
| H | -4.42493094489734 | 5.54034673122610  | 3.92539785757128  |
| C | -3.78316734074889 | 10.01611383489777 | 13.09670726838860 |
| C | -3.26290994879604 | 9.31947929765728  | 14.20413513934917 |
| H | -2.69221432210491 | 8.40359135564348  | 14.03718560040375 |
| C | -4.52496821244718 | 11.18833667735719 | 13.34134293010795 |

|   |                    |                   |                   |
|---|--------------------|-------------------|-------------------|
| H | -4.92533699422950  | 11.75420460374221 | 12.49794097397015 |
| C | -3.48139930198456  | 9.77253086620166  | 15.50801474061088 |
| H | -3.06694259084686  | 9.21132825167489  | 16.34959806594531 |
| C | -4.23264019676199  | 10.93100369199036 | 15.73474182651474 |
| H | -4.41378281108582  | 11.28539642024672 | 16.75321578369459 |
| C | -4.75291016893519  | 11.63675716421109 | 14.64454650334556 |
| H | -5.33455854656076  | 12.54759960493269 | 14.80974977512188 |
| C | -10.12741176021986 | 11.17376511015535 | 6.78278772767735  |
| H | -11.10271325958580 | 11.61089800490820 | 6.55224747071318  |
| C | -9.23212223023235  | 11.84863863331254 | 7.61987115690617  |
| H | -9.50763011056755  | 12.81379712980837 | 8.05390625057640  |
| H | 3.35813173117250   | 5.55765836332475  | 12.05260446776530 |
| H | 5.18414703815956   | 6.05820617621271  | 10.43233821010825 |
| C | -0.49393917379223  | 6.94782961054398  | 8.11154418087224  |
| C | -0.69955804349804  | 5.84886388441820  | 6.14568939243185  |
| H | -0.56353305657149  | 5.20093406249101  | 5.28328540071114  |
| C | 0.09679153458676   | 5.94732050895771  | 7.25210611239825  |
| H | 1.00429093270143   | 5.38942340803457  | 7.46807812587922  |
| H | 1.02506604855812   | 8.87263743104111  | 11.64111468377243 |
| C | 0.08718200121891   | 7.45215758087611  | 9.28546660907824  |
| C | 1.49046777272800   | 7.06067277375691  | 9.60419416441077  |
| C | 1.81050433169145   | 6.41957166913716  | 10.81533011456756 |
| H | 1.01253363930234   | 6.19075293695881  | 11.52494860852261 |
| C | 3.12911838392134   | 6.06220049703180  | 11.11018672283320 |
| C | 4.15363909480905   | 6.33924904508816  | 10.19864727287787 |
| C | 3.84839522392513   | 6.97026752594374  | 8.98738099013596  |
| H | 4.64180933286319   | 7.19497111618326  | 8.26977186027847  |
| C | 2.52936721522736   | 7.32638500820378  | 8.69331014942650  |
| H | 2.29511708853592   | 7.83089996143420  | 7.75292914489785  |
| H | -10.46239542784505 | 9.39701799778152  | 5.59386759967576  |
| C | -2.38341139861022  | 10.20982012200459 | 7.91025493432923  |
| O | -2.68285983050712  | 11.32769743480753 | 8.29192436825606  |
| O | -1.40970021680470  | 10.16174204557156 | 6.93180973989135  |

H -1.24379527624972 9.21591413750487 6.77299333362415

o) **<sup>3</sup>D**

No imaginary frequency.

|    |                   |                   |                   |
|----|-------------------|-------------------|-------------------|
| Fe | -3.06722272424901 | 8.52767144604051  | 8.47813065062273  |
| N  | -4.63615107655702 | 9.13619078411162  | 9.51211827978467  |
| N  | -4.23808226864408 | 8.36783435138262  | 6.85152220745873  |
| N  | -1.69851016052430 | 7.36402299399897  | 7.58610790826871  |
| N  | -1.96181286002955 | 8.55512410524133  | 10.11707548908044 |
| C  | -4.70177473936229 | 9.29847024309797  | 10.88674300533784 |
| C  | -5.93299530385524 | 9.30440820843209  | 9.04411715938175  |
| C  | -5.43237278956456 | 9.05831990346810  | 6.65512972003719  |
| C  | -3.82821058000056 | 7.93998171750228  | 5.60017972356126  |
| C  | -1.81951862210881 | 6.72510478902724  | 6.35794953280692  |
| C  | -0.59193392598985 | 8.29181271047573  | 10.17485528119342 |
| C  | -2.27754785788128 | 9.22523222607219  | 11.28851994490070 |
| C  | -6.06374576238031 | 9.40507145686490  | 11.29269986512718 |
| H  | -6.41341019744508 | 9.48506989580092  | 12.31864770227833 |
| C  | -6.82993785575771 | 9.42002829566548  | 10.13857201822887 |
| H  | -7.91040577319325 | 9.51180385121531  | 10.05963536244014 |
| C  | -5.69487978918454 | 9.17144833801514  | 5.23523636630083  |
| H  | -6.52985291202836 | 9.70675829123908  | 4.79098969533996  |
| C  | -4.72310571728669 | 8.46923663985776  | 4.58901576107311  |
| H  | -4.61178989463129 | 8.31932099787302  | 3.51784228727660  |
| C  | -0.02786189697825 | 8.94899470206581  | 11.33544484693385 |
| C  | -1.05950473296579 | 9.51884891500066  | 12.01835582791104 |
| H  | -1.00436946727976 | 10.08904014121862 | 12.94213315209137 |
| C  | -6.28227459385547 | 9.45918443236861  | 7.67461042312462  |
| C  | -2.75446940894750 | 7.09480399226178  | 5.34967448382136  |
| C  | -3.57077804690065 | 9.49299015853944  | 11.72885781067778 |
| C  | -7.59965249717426 | 10.07834972267617 | 7.36510243589905  |

|   |                    |                   |                   |
|---|--------------------|-------------------|-------------------|
| C | -8.52355003542147  | 9.47025959312970  | 6.49433976659640  |
| H | -8.27934870511547  | 8.50599696971136  | 6.04428016676958  |
| C | -9.75202264174760  | 10.07546076062345 | 6.21167904632995  |
| C | -7.95774306114256  | 11.30636906884869 | 7.95884089134077  |
| H | -7.25338147052245  | 11.79393489039637 | 8.63629278230342  |
| C | -2.53653329993673  | 6.57697324502322  | 3.97152913250674  |
| C | -1.33037720637711  | 6.83517501581865  | 3.29181362071796  |
| H | -0.56186774065433  | 7.43446054382524  | 3.78488961154605  |
| C | -1.11521447778530  | 6.34876618602606  | 2.00060179945330  |
| H | -0.17645031934868  | 6.57271042331176  | 1.48676996545148  |
| C | -2.10069291743161  | 5.58543005973225  | 1.36279779082007  |
| H | -1.92817260651203  | 5.19482864874753  | 0.35627963304649  |
| C | -3.30588663800743  | 5.32341254459294  | 2.02346053234262  |
| H | -4.08089546026051  | 4.72643144816489  | 1.53515349539624  |
| C | -3.52106525293113  | 5.81526478808917  | 3.31508621403144  |
| H | -4.45852988547818  | 5.59780953190176  | 3.83261394724454  |
| C | -3.79241250586736  | 9.99766261403867  | 13.11086253635672 |
| C | -3.21795330373529  | 9.34975026569319  | 14.22297713546019 |
| H | -2.60320662570845  | 8.46176257216880  | 14.06158493284600 |
| C | -4.59707081642942  | 11.12997586225996 | 13.35521506879225 |
| H | -5.04360920160450  | 11.65963059968536 | 12.51164190683592 |
| C | -3.43853559823600  | 9.81138851227365  | 15.52392497099495 |
| H | -2.97955922699853  | 9.28626994440338  | 16.36596415660930 |
| C | -4.25215796711959  | 10.92724807941645 | 15.74776211391279 |
| H | -4.43825090907033  | 11.28621099754817 | 16.76378217070548 |
| C | -4.82887254327758  | 11.58520077820877 | 14.65469873731244 |
| H | -5.45714681075264  | 12.46538292195572 | 14.81618649399641 |
| C | -10.08936132844536 | 11.29646244736291 | 6.80442980423607  |
| H | -11.04939658237778 | 11.76969829357020 | 6.58159738751232  |
| C | -9.18814749341090  | 11.90676349472887 | 7.68533768897788  |
| H | -9.44368130162695  | 12.85952034271308 | 8.15761600128850  |
| H | 3.46886960807287   | 5.77757888729901  | 12.10084499691587 |
| H | 5.23634934723416   | 6.17797973370514  | 10.38909666557989 |

|   |                    |                   |                   |
|---|--------------------|-------------------|-------------------|
| C | -0.52295349712974  | 6.88267522942948  | 8.15845046428847  |
| C | -0.78721211620242  | 5.75898566293555  | 6.21677028473647  |
| H | -0.66096819354857  | 5.09378903548591  | 5.36615461992749  |
| C | 0.02341615196228   | 5.86154702736528  | 7.33989798065281  |
| H | 0.92139489822683   | 5.29044327710189  | 7.56109491248499  |
| H | 1.02641354338189   | 8.96490677548506  | 11.60105423083245 |
| C | 0.08708232724066   | 7.43863921265882  | 9.31782414804838  |
| C | 1.50132450742129   | 7.07706406627771  | 9.61147709705530  |
| C | 1.87073319796682   | 6.52581833933148  | 10.85332853090410 |
| H | 1.09918855721658   | 6.33428234890324  | 11.60208493140141 |
| C | 3.20363495098507   | 6.20911166049201  | 11.13190523603726 |
| C | 4.19487920149855   | 6.42869212025948  | 10.17024743282797 |
| C | 3.84042204853027   | 6.96171054604041  | 8.92487116739985  |
| H | 4.60719676165275   | 7.13957654231179  | 8.16619631349335  |
| C | 2.50901725324467   | 7.28059872131946  | 8.64868283865216  |
| H | 2.23918158304575   | 7.71029028648367  | 7.68122125365894  |
| H | -10.45419219792161 | 9.58435072740857  | 5.53282664734660  |
| C | -2.37381208128540  | 10.14763261887109 | 7.73043438425893  |
| O | -2.68846511543996  | 11.23852448445125 | 8.13790363426997  |
| O | -1.48555202179069  | 10.04446379926143 | 6.72514866745595  |
| H | -1.29818832625307  | 9.09391214363808  | 6.59985611907797  |

p) <sup>5</sup>D

No imaginary frequency.

|    |                   |                  |                   |
|----|-------------------|------------------|-------------------|
| Fe | -3.06844651788818 | 8.55715684389281 | 8.46530915966463  |
| N  | -4.66581274877489 | 9.14414082014925 | 9.53313365173805  |
| N  | -4.23586087664590 | 8.34466183575105 | 6.87698120244619  |
| N  | -1.67496592392203 | 7.36462695396343 | 7.56354671997797  |
| N  | -1.99909572118364 | 8.50383926998834 | 10.12957560771054 |
| C  | -4.74494704188946 | 9.25814045833221 | 10.91240439142869 |
| C  | -5.95364687364894 | 9.29607608100024 | 9.05617235878150  |

|   |                   |                   |                   |
|---|-------------------|-------------------|-------------------|
| C | -5.41770710621779 | 9.05877116961692  | 6.67244352193187  |
| C | -3.81471853128909 | 7.91868187876566  | 5.61803965429823  |
| C | -1.81862900799502 | 6.68610943264199  | 6.36095430850026  |
| C | -0.62201346306471 | 8.27787425759510  | 10.17127384322492 |
| C | -2.32110517482323 | 9.18108962499445  | 11.30545201079663 |
| C | -6.10774700169643 | 9.34717416443952  | 11.30712905810373 |
| H | -6.46888706706996 | 9.40209155105299  | 12.33099088522538 |
| C | -6.86363283645380 | 9.38072476489893  | 10.14333005227324 |
| H | -7.94388588219776 | 9.46806151519278  | 10.05480309516181 |
| C | -5.65084504525677 | 9.19532748616953  | 5.25165593855478  |
| H | -6.46266758197458 | 9.75926429085978  | 4.80020512139725  |
| C | -4.68393850831479 | 8.48017384182172  | 4.60951656540520  |
| H | -4.55765063426564 | 8.34798077124375  | 3.53760376605842  |
| C | -0.06656820522720 | 8.95343927622727  | 11.32315289229189 |
| C | -1.10524444956583 | 9.49956376424531  | 12.01792439357763 |
| H | -1.05152427489810 | 10.07466334240965 | 12.93871465577571 |
| C | -6.28387533773353 | 9.46288480594538  | 7.67934837965563  |
| C | -2.76054077566288 | 7.05326614448908  | 5.36105951604087  |
| C | -3.61163059201740 | 9.43822034960678  | 11.75493368891763 |
| C | -7.58820435566057 | 10.09614488966386 | 7.35138543474384  |
| C | -8.49041251523939 | 9.51965928119051  | 6.43623079316908  |
| H | -8.24186421777924 | 8.56419355140806  | 5.97022659545063  |
| C | -9.70284003600275 | 10.14407531755797 | 6.12903856351101  |
| C | -7.95653287855610 | 11.31106228245735 | 7.96666336402473  |
| H | -7.26977461390106 | 11.77599837922584 | 8.67731928864719  |
| C | -2.56954409433562 | 6.51861946011368  | 3.98556708180909  |
| C | -1.35701990479000 | 6.72492604128687  | 3.29954606679080  |
| H | -0.56407453382772 | 7.29835928834249  | 3.78426911691132  |
| C | -1.16747669060989 | 6.22126707325991  | 2.01096773450202  |
| H | -0.22294303401503 | 6.40307634377268  | 1.49131538898375  |
| C | -2.18585313386870 | 5.49418137489747  | 1.38288705224452  |
| H | -2.03419519823185 | 5.09124371332025  | 0.37787999969949  |
| C | -3.39710304162423 | 5.28323796824718  | 2.05068506896971  |



|   |                    |                   |                   |
|---|--------------------|-------------------|-------------------|
| H | -4.19661548759393  | 4.71336272332542  | 1.56963951409971  |
| C | -3.58690008478486  | 5.79112404457327  | 3.33986853900331  |
| H | -4.52880822461788  | 5.61193530227906  | 3.86383185718627  |
| C | -3.82815496484817  | 9.93818857544308  | 13.13860372130127 |
| C | -3.23650827575505  | 9.29572466267952  | 14.24449427223023 |
| H | -2.61414119600889  | 8.41423921878890  | 14.07728913779364 |
| C | -4.64355494847957  | 11.06145866808721 | 13.38771965786521 |
| H | -5.10126575518718  | 11.58645351961108 | 12.54739464571346 |
| C | -3.45108562695335  | 9.75569276261720  | 15.54684559498397 |
| H | -2.97960645491520  | 9.23612009923113  | 16.38525655496903 |
| C | -4.27415284096094  | 10.86344079216805 | 15.77646837625764 |
| H | -4.45428804612523  | 11.22148751176847 | 16.79382528477293 |
| C | -4.86754620355012  | 11.51541287869575 | 14.68885161676669 |
| H | -5.50241480264112  | 12.38973268139753 | 14.85561128835583 |
| C | -10.04839422985506 | 11.35312941013567 | 6.74160422720488  |
| H | -10.99550792196781 | 11.84210679934224 | 6.49860520295734  |
| C | -9.17181564941635  | 11.93010908656614 | 7.66873894507216  |
| H | -9.43384296534727  | 12.87317816358581 | 8.15661613883358  |
| H | 3.53940106518441   | 5.88366847133709  | 12.05955293872968 |
| H | 5.27048326495260   | 6.28732397940864  | 10.31157699977118 |
| C | -0.51273723476837  | 6.88342398597419  | 8.14536085927235  |
| C | -0.79655816251592  | 5.70905308621547  | 6.23554657351727  |
| H | -0.68092213655380  | 5.02001548017088  | 5.40220310658388  |
| C | 0.02362999036172   | 5.83531269796245  | 7.35088564170206  |
| H | 0.91636496473873   | 5.26045325363435  | 7.58445286037627  |
| H | 0.99011082128486   | 9.00242668144853  | 11.57480654383881 |
| C | 0.08560169427446   | 7.45055563971433  | 9.30675318448434  |
| C | 1.50852014970234   | 7.12329516798998  | 9.59014451172221  |
| C | 1.90869276558473   | 6.59334825495846  | 10.83217966349963 |
| H | 1.15349351278691   | 6.39657340720711  | 11.59613136435133 |
| C | 3.25080332058941   | 6.30008118938764  | 11.09068372738015 |
| C | 4.22191057589054   | 6.52119154389657  | 10.10881878017115 |
| C | 3.83769673933195   | 7.03359129727258  | 8.86361553527768  |

|   |                    |                   |                  |
|---|--------------------|-------------------|------------------|
| H | 4.58804478331253   | 7.21239040818787  | 8.08885221446578 |
| C | 2.49742643826023   | 7.32986158152021  | 8.60755807585664 |
| H | 2.20470715900777   | 7.74424061982794  | 7.64003371797118 |
| H | -10.38669578100990 | 9.67706556970252  | 5.41531200217642 |
| C | -2.21055096744628  | 10.39694938631367 | 7.74468568764308 |
| O | -2.52560640060024  | 11.53819034470705 | 8.00464878427707 |
| O | -1.20107723609181  | 10.20891725100048 | 6.84305631316259 |
| H | -1.07021521914894  | 9.24303214182775  | 6.77888935000566 |

q) <sup>1</sup>TS5

One imaginary frequency of  $-168 \text{ cm}^{-1}$ .

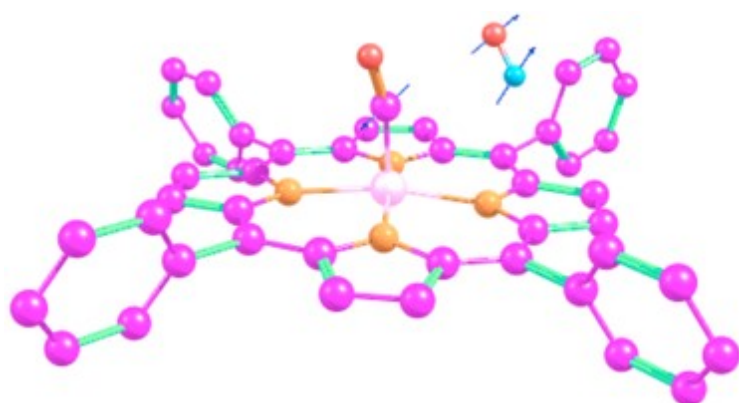

**Figure S22:** Normal mode of vibration associated with the imaginary frequency of  $-168 \text{ cm}^{-1}$  in <sup>1</sup>TS5. Blue arrows represent atom displacement vectors. For clarity, all hydrogens are omitted, except the hydrogen of the forming hydroxide ion.

|    |              |             |              |
|----|--------------|-------------|--------------|
| Fe | -1.869156000 | 6.850350000 | 8.819857000  |
| N  | -1.974005000 | 6.860383000 | 10.831771000 |
| N  | -3.744099000 | 7.591639000 | 8.733141000  |
| N  | -1.967252000 | 6.465872000 | 6.844583000  |
| N  | -0.197350000 | 5.732472000 | 8.943967000  |
| C  | -1.030476000 | 6.385301000 | 11.723205000 |
| C  | -2.961979000 | 7.435170000 | 11.607005000 |
| C  | -4.488123000 | 8.084946000 | 9.787526000  |

|   |              |              |              |
|---|--------------|--------------|--------------|
| C | -4.492595000 | 7.844762000  | 7.599275000  |
| C | -2.949899000 | 6.857294000  | 5.957341000  |
| C | 0.575541000  | 5.307805000  | 7.884642000  |
| C | 0.525695000  | 5.423351000  | 10.078258000 |
| C | -1.450743000 | 6.643374000  | 13.081649000 |
| H | -0.904947000 | 6.344438000  | 13.972455000 |
| C | -2.644927000 | 7.295498000  | 13.009702000 |
| H | -3.271806000 | 7.636846000  | 13.829219000 |
| C | -5.723338000 | 8.658674000  | 9.305818000  |
| H | -6.487967000 | 9.112716000  | 9.930403000  |
| C | -5.731757000 | 8.498510000  | 7.952560000  |
| H | -6.507110000 | 8.790411000  | 7.249435000  |
| C | 1.801900000  | 4.713098000  | 8.359393000  |
| C | 1.769802000  | 4.779219000  | 9.721174000  |
| H | 2.519945000  | 4.432426000  | 10.426711000 |
| C | -4.134920000 | 8.032170000  | 11.138162000 |
| C | -4.141197000 | 7.508745000  | 6.289198000  |
| C | 0.153605000  | 5.720723000  | 11.392951000 |
| C | -5.083259000 | 8.603861000  | 12.144075000 |
| C | -6.292385000 | 7.950479000  | 12.433896000 |
| H | -6.535997000 | 7.021285000  | 11.912842000 |
| C | -7.175959000 | 8.474795000  | 13.381673000 |
| C | -4.776689000 | 9.793907000  | 12.823154000 |
| H | -3.837945000 | 10.308635000 | 12.603661000 |
| C | -5.087130000 | 7.865925000  | 5.187563000  |
| C | -5.286976000 | 9.207442000  | 4.822146000  |
| H | -4.738486000 | 9.992178000  | 5.348862000  |
| C | -6.174191000 | 9.541099000  | 3.794628000  |
| H | -6.316525000 | 10.589667000 | 3.520214000  |
| C | -6.874802000 | 8.536824000  | 3.117813000  |
| H | -7.569046000 | 8.797053000  | 2.314598000  |
| C | -6.682329000 | 7.197584000  | 3.474070000  |
| H | -7.228096000 | 6.407185000  | 2.952039000  |

|   |              |              |              |
|---|--------------|--------------|--------------|
| C | -5.794210000 | 6.864925000  | 4.501143000  |
| H | -5.646636000 | 5.818865000  | 4.780671000  |
| C | 1.069866000  | 5.310690000  | 12.500802000 |
| C | 1.257858000  | 3.953291000  | 12.810198000 |
| H | 0.722280000  | 3.194467000  | 12.234520000 |
| C | 1.760056000  | 6.277243000  | 13.251249000 |
| H | 1.622244000  | 7.335337000  | 13.015666000 |
| C | 2.115851000  | 3.570788000  | 13.845437000 |
| H | 2.248527000  | 2.510442000  | 14.075882000 |
| C | 2.799607000  | 4.541154000  | 14.585986000 |
| H | 3.470981000  | 4.242632000  | 15.395301000 |
| C | 2.619248000  | 5.895739000  | 14.285767000 |
| H | 3.151743000  | 6.660079000  | 14.857876000 |
| C | -6.862352000 | 9.661958000  | 14.052480000 |
| H | -7.552756000 | 10.072489000 | 14.793886000 |
| C | -5.660541000 | 10.320226000 | 13.770346000 |
| H | -5.409337000 | 11.249098000 | 14.289182000 |
| H | 2.602175000  | 2.684343000  | 3.532243000  |
| H | 4.163261000  | 4.533885000  | 2.930433000  |
| C | -0.956727000 | 5.942986000  | 6.069885000  |
| C | -2.552907000 | 6.552377000  | 4.600631000  |
| H | -3.148242000 | 6.753450000  | 3.714020000  |
| C | -1.312465000 | 5.990968000  | 4.671627000  |
| H | -0.687325000 | 5.634221000  | 3.856823000  |
| H | 2.579518000  | 4.297078000  | 7.723572000  |
| C | 0.260077000  | 5.446544000  | 6.533873000  |
| C | 1.325809000  | 5.143390000  | 5.529577000  |
| C | 1.471740000  | 3.885412000  | 4.931271000  |
| H | 0.785821000  | 3.076875000  | 5.197664000  |
| C | 2.491559000  | 3.667756000  | 3.997126000  |
| C | 3.367073000  | 4.705715000  | 3.659988000  |
| C | 3.221551000  | 5.963568000  | 4.259357000  |
| H | 3.907263000  | 6.774507000  | 3.996502000  |

|   |              |             |              |
|---|--------------|-------------|--------------|
| C | 2.204926000  | 6.187567000 | 5.192217000  |
| H | 2.046169000  | 7.151697000 | 5.701217000  |
| H | -8.111332000 | 7.952136000 | 13.598612000 |
| C | -1.175750000 | 8.472831000 | 8.807549000  |
| O | -1.000719000 | 9.578838000 | 9.057212000  |
| O | 1.071064000  | 8.384624000 | 7.201655000  |
| H | 1.173255000  | 7.586323000 | 7.730492000  |

r)  ${}^1E$

One imaginary frequency of  $-7\text{ cm}^{-1}$ .

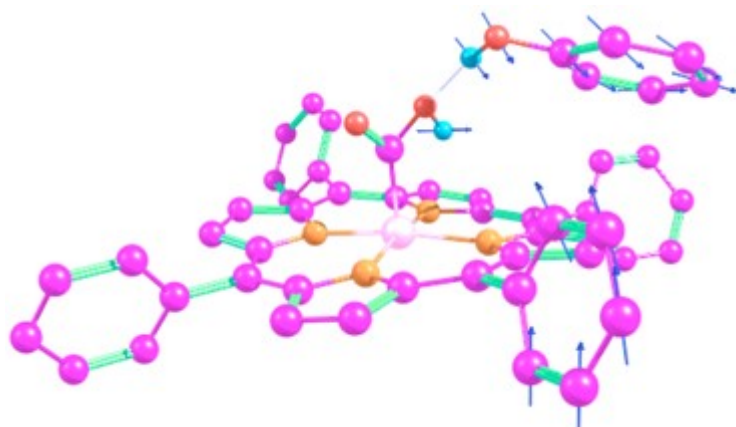

**Figure S23:** Normal mode of vibration associated with the imaginary frequency of  $-7\text{ cm}^{-1}$  in  ${}^1E$ . Blue arrows represent atom displacement vectors. For clarity, all hydrogens are omitted, except the hydrogens involved in the formation of the  $\text{H}_2\text{O}$  molecule.

|    |                   |                   |                   |
|----|-------------------|-------------------|-------------------|
| Fe | -3.01860696228867 | 8.41004880654802  | 8.40684577252160  |
| N  | -4.40065044840683 | 9.50488696858514  | 9.35411889578651  |
| N  | -4.36194886955551 | 7.89906077198793  | 7.00874511715454  |
| N  | -1.73653071535960 | 7.03611140966917  | 7.64960354891859  |
| N  | -1.74922931019404 | 8.71021545745836  | 9.92556583914809  |
| C  | -4.20160225616572 | 10.32253736405972 | 10.44584183743680 |
| C  | -5.70445047159523 | 9.72135505768523  | 8.95871784654249  |

|   |                    |                   |                   |
|---|--------------------|-------------------|-------------------|
| C | -5.65078140659003  | 8.37617225594899  | 6.89047162936177  |
| C | -4.12220046234228  | 7.17736460182539  | 5.85361583607968  |
| C | -1.89011907939615  | 6.32859358712086  | 6.47215039614296  |
| C | -0.52360338298786  | 8.10733769537314  | 10.14420353213381 |
| C | -1.87454687743338  | 9.66446886004840  | 10.91789056107505 |
| C | -5.41460441292421  | 11.04888991347469 | 10.76055619109182 |
| H | -5.53267170699418  | 11.75747299857872 | 11.57561816885933 |
| C | -6.35391047772366  | 10.65348438623729 | 9.85667345067563  |
| H | -7.38899146365341  | 10.97783471419833 | 9.78890653742728  |
| C | -6.22810872152025  | 7.96024233473241  | 5.63071673360316  |
| H | -7.22653048145956  | 8.21423306104833  | 5.28353459572666  |
| C | -5.27609243121045  | 7.23441005988074  | 4.97998163130594  |
| H | -5.34754893725544  | 6.77492398254412  | 3.99791146135223  |
| C | 0.13012215100324   | 8.70143783532509  | 11.29086396119992 |
| C | -0.70019711782137  | 9.67001878592671  | 11.76450055936712 |
| H | -0.54121734049404  | 10.32620774310983 | 12.61606374346805 |
| C | -6.30915388221836  | 9.20188656828130  | 7.80899509266728  |
| C | -2.95662548736998  | 6.45520475878245  | 5.57235028555803  |
| C | -3.00101850046385  | 10.45852563005669 | 11.15249560282809 |
| C | -7.72281170595256  | 9.59403554782635  | 7.51676345134560  |
| C | -8.75997259581616  | 8.65094774999613  | 7.60422633489233  |
| H | -8.52128562132163  | 7.62144691371621  | 7.88288717672894  |
| C | -10.08453281406868 | 9.02151124513210  | 7.35104367839056  |
| C | -8.04196932966386  | 10.91434486515741 | 7.15658591362361  |
| H | -7.24026672800306  | 11.65180338989565 | 7.07208730342245  |
| C | -2.82758246144679  | 5.76522139244752  | 4.25391143177916  |
| C | -1.82008285394835  | 6.17094247270599  | 3.35982500280406  |
| H | -1.15286211795032  | 6.98724143271723  | 3.64719222137256  |
| C | -1.67067839097788  | 5.54597320927548  | 2.11896117963842  |
| H | -0.88630193734924  | 5.87824034455943  | 1.43370294345616  |
| C | -2.52874358366939  | 4.50307037899012  | 1.75153269966962  |
| H | -2.41227163938304  | 4.01284810550493  | 0.78143313463928  |
| C | -3.53260621784615  | 4.08772675114694  | 2.63364410261467  |

|   |                    |                   |                   |
|---|--------------------|-------------------|-------------------|
| H | -4.20163042217356  | 3.26938183327689  | 2.35423724652556  |
| C | -3.68008019761936  | 4.71372517274362  | 3.87589030067189  |
| H | -4.45627525787466  | 4.37952920581069  | 4.56843673242149  |
| C | -2.92042959750380  | 11.48968742519992 | 12.23164547638511 |
| C | -3.65291169493804  | 11.36473928653414 | 13.42394675868128 |
| H | -4.28847642411185  | 10.48857710133345 | 13.57390731716425 |
| C | -2.09632284999348  | 12.61562011838507 | 12.06027986275876 |
| H | -1.52441266487193  | 12.72233437247578 | 11.13541884588124 |
| C | -3.56947562488162  | 12.34510651080213 | 14.41778451225959 |
| H | -4.14330535090994  | 12.22762291061228 | 15.34097573122278 |
| C | -2.74822745598512  | 13.46431714870205 | 14.23621193533631 |
| H | -2.68283723469717  | 14.23020443237298 | 15.01356455521200 |
| C | -2.00931004648870  | 13.59503954465151 | 13.05416251704247 |
| H | -1.36623282542213  | 14.46557169029889 | 12.89884509837976 |
| C | -10.39270568465753 | 10.34213326663923 | 7.00762017937911  |
| H | -11.42787797443267 | 10.63531652684827 | 6.81294193662303  |
| C | -9.36595890573768  | 11.28724950185528 | 6.90738826690486  |
| H | -9.59790615606005  | 12.31828358131431 | 6.62705453731943  |
| H | 2.91578455309907   | 4.80385150833230  | 12.27650693229193 |
| H | 4.89600919234512   | 5.19137655113254  | 10.81480759445278 |
| C | -0.55316265319449  | 6.57995143092006  | 8.20785456920783  |
| C | -0.80803181575696  | 5.38497469664762  | 6.30927507408448  |
| H | -0.70456278632760  | 4.68544073255806  | 5.48354490851912  |
| C | 0.01081428531643   | 5.52893485985839  | 7.39183824432348  |
| H | 0.91454123974802   | 4.97089005544701  | 7.62126794247991  |
| H | 1.10806274955994   | 8.42162440610274  | 11.66889955848133 |
| C | 0.04394715277605   | 7.09102702981691  | 9.36712201729677  |
| C | 1.38054238871764   | 6.55589788148515  | 9.76626370266816  |
| C | 1.54768157102531   | 5.84497790384757  | 10.96702410363261 |
| H | 0.68153168328781   | 5.66990621133682  | 11.60941350141277 |
| C | 2.80387023581268   | 5.35771742527984  | 11.34070322711548 |
| C | 3.91511741334498   | 5.57308271317030  | 10.51870179952216 |
| C | 3.76022620707944   | 6.27533735746773  | 9.31814729751476  |

|   |                    |                   |                   |
|---|--------------------|-------------------|-------------------|
| H | 4.62218027126283   | 6.45215978135145  | 8.66941948480966  |
| C | 2.50325415038529   | 6.76075231246811  | 8.94563299773966  |
| H | 2.38491397663022   | 7.31515790875039  | 8.01186156601004  |
| H | -10.88002535209091 | 8.27600147881140  | 7.43001583509068  |
| C | -2.41411784480127  | 9.88777081550287  | 7.41555858699641  |
| O | -2.94745701896964  | 10.94776607971614 | 7.16098124189019  |
| O | -1.11403514221865  | 9.75776724454861  | 6.88460554997165  |
| C | 0.97006522925480   | 11.73140655598781 | 8.81236151299589  |
| C | 1.24884176542643   | 12.70291980762476 | 9.79144003678454  |
| C | 1.67082151712116   | 10.51276120542751 | 8.83894352365883  |
| C | 2.20946204149220   | 12.45647468735414 | 10.77543956259842 |
| C | 2.62533707986556   | 10.27609862477313 | 9.83140739044827  |
| C | 2.90704440520459   | 11.24175714551436 | 10.80312301622494 |
| H | 0.69635839479938   | 13.64548909070218 | 9.76622545068612  |
| H | 1.45258154587289   | 9.74545702260986  | 8.09299730029294  |
| H | 2.41214387636918   | 13.22266876108017 | 11.52917257518805 |
| H | 3.14305772559414   | 9.31434101546905  | 9.85087272050597  |
| H | 3.65411781885409   | 11.04530210537976 | 11.57582749234370 |
| O | 0.03553878971909   | 12.01982413454303 | 7.87560721267735  |
| H | -0.81814636249135  | 8.85528014125906  | 7.09747288076007  |
| H | -0.24753393993540  | 11.20004849730469 | 7.40598601234103  |

s) **<sup>1</sup>TS4**

One imaginary frequency of  $-930 \text{ cm}^{-1}$ .



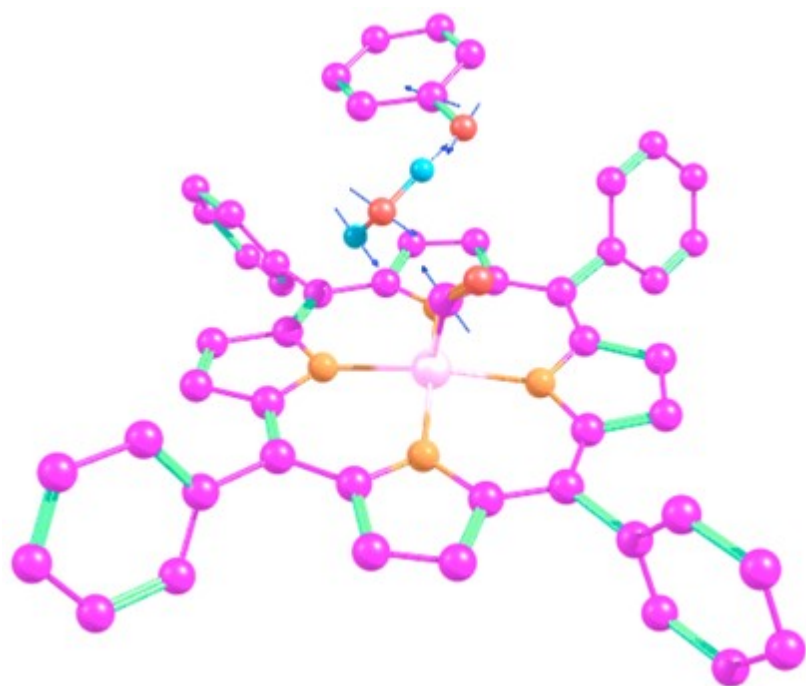

**Figure S24:** Normal mode of vibration associated with the imaginary frequency of  $-930\text{ cm}^{-1}$  in  ${}^1\text{TS4}$ . Blue arrows represent atom displacement vectors. For clarity, all hydrogens are omitted, except the hydrogens involved in the formation of the  $\text{H}_2\text{O}$  molecule.

|    |              |              |              |
|----|--------------|--------------|--------------|
| Fe | -3.100323000 | 8.442489000  | 8.330562000  |
| N  | -4.601216000 | 9.203658000  | 9.428352000  |
| N  | -4.351595000 | 8.213105000  | 6.775385000  |
| N  | -1.698189000 | 7.403645000  | 7.331813000  |
| N  | -1.983460000 | 8.305293000  | 9.998696000  |
| C  | -4.499409000 | 9.744938000  | 10.694275000 |
| C  | -5.884821000 | 9.478222000  | 9.002892000  |
| C  | -5.675366000 | 8.595617000  | 6.709905000  |
| C  | -4.011906000 | 7.816548000  | 5.496577000  |
| C  | -1.700745000 | 7.115258000  | 5.982370000  |
| C  | -0.756386000 | 7.686860000  | 10.146505000 |
| C  | -2.231551000 | 8.931044000  | 11.201079000 |
| C  | -5.747239000 | 10.372545000 | 11.068803000 |
| H  | -5.940470000 | 10.878483000 | 12.010242000 |
| C  | -6.614255000 | 10.178861000 | 10.035891000 |
| H  | -7.650998000 | 10.497691000 | 9.968333000  |

|   |               |              |              |
|---|---------------|--------------|--------------|
| C | -6.183870000  | 8.415593000  | 5.368083000  |
| H | -7.196237000  | 8.645620000  | 5.045474000  |
| C | -5.148242000  | 7.952985000  | 4.612683000  |
| H | -5.150714000  | 7.716912000  | 3.551820000  |
| C | -0.243560000  | 7.904710000  | 11.481031000 |
| C | -1.153274000  | 8.678387000  | 12.131331000 |
| H | -1.100955000  | 9.049434000  | 13.150747000 |
| C | -6.415519000  | 9.175289000  | 7.745449000  |
| C | -2.758859000  | 7.341288000  | 5.094571000  |
| C | -3.372486000  | 9.675181000  | 11.521576000 |
| C | -7.844619000  | 9.526268000  | 7.478810000  |
| C | -8.817248000  | 8.517081000  | 7.396782000  |
| H | -8.515862000  | 7.473621000  | 7.519844000  |
| C | -10.158480000 | 8.839362000  | 7.170401000  |
| C | -8.239964000  | 10.863722000 | 7.313056000  |
| H | -7.486483000  | 11.653555000 | 7.365479000  |
| C | -2.531384000  | 7.008418000  | 3.655558000  |
| C | -1.620448000  | 7.764565000  | 2.897939000  |
| H | -1.111952000  | 8.611054000  | 3.365970000  |
| C | -1.351435000  | 7.432461000  | 1.567263000  |
| H | -0.636945000  | 8.028144000  | 0.993115000  |
| C | -1.993653000  | 6.340296000  | 0.972762000  |
| H | -1.768364000  | 6.067220000  | -0.061704000 |
| C | -2.913834000  | 5.589830000  | 1.713453000  |
| H | -3.421161000  | 4.736930000  | 1.254813000  |
| C | -3.182539000  | 5.923603000  | 3.044361000  |
| H | -3.890546000  | 5.328016000  | 3.625469000  |
| C | -3.358590000  | 10.418457000 | 12.816528000 |
| C | -4.241161000  | 10.114711000 | 13.866318000 |
| H | -4.977469000  | 9.317899000  | 13.737910000 |
| C | -2.402981000  | 11.435688000 | 12.998716000 |
| H | -1.726120000  | 11.668543000 | 12.172216000 |
| C | -4.166631000  | 10.810905000 | 15.076875000 |

|   |               |              |              |
|---|---------------|--------------|--------------|
| H | -4.852545000  | 10.557002000 | 15.889677000 |
| C | -3.206582000  | 11.814523000 | 15.253874000 |
| H | -3.139830000  | 12.349370000 | 16.204980000 |
| C | -2.326301000  | 12.126921000 | 14.210986000 |
| H | -1.575016000  | 12.910226000 | 14.344320000 |
| C | -10.544889000 | 10.175327000 | 7.019140000  |
| H | -11.593870000 | 10.429020000 | 6.844449000  |
| C | -9.581023000  | 11.187081000 | 7.086252000  |
| H | -9.876204000  | 12.232289000 | 6.960006000  |
| H | 2.841899000   | 4.146613000  | 11.432908000 |
| H | 4.872206000   | 5.217383000  | 10.463465000 |
| C | -0.495274000  | 6.928656000  | 7.815397000  |
| C | -0.474395000  | 6.444879000  | 5.611620000  |
| H | -0.228081000  | 6.089662000  | 4.614588000  |
| C | 0.263020000   | 6.313033000  | 6.749955000  |
| H | 1.231453000   | 5.834247000  | 6.864599000  |
| H | 0.704024000   | 7.532985000  | 11.858530000 |
| C | -0.041043000  | 7.035277000  | 9.136300000  |
| C | 1.313334000   | 6.500975000  | 9.473487000  |
| C | 1.466020000   | 5.434318000  | 10.374263000 |
| H | 0.577455000   | 4.968842000  | 10.807190000 |
| C | 2.738797000   | 4.975059000  | 10.727289000 |
| C | 3.878459000   | 5.573977000  | 10.178856000 |
| C | 3.737077000   | 6.628441000  | 9.269041000  |
| H | 4.619505000   | 7.104665000  | 8.833554000  |
| C | 2.463937000   | 7.088011000  | 8.920540000  |
| H | 2.354190000   | 7.922578000  | 8.224325000  |
| H | -10.905288000 | 8.043271000  | 7.114200000  |
| C | -2.652127000  | 10.099829000 | 7.756502000  |
| O | -2.972914000  | 11.091470000 | 7.246837000  |
| O | -0.740163000  | 10.353110000 | 8.139833000  |
| C | 0.760434000   | 11.395207000 | 10.760810000 |
| C | 1.130776000   | 12.098958000 | 11.939186000 |

|   |              |              |              |
|---|--------------|--------------|--------------|
| C | 1.674388000  | 10.412649000 | 10.288570000 |
| C | 2.325917000  | 11.819538000 | 12.605512000 |
| C | 2.860412000  | 10.136747000 | 10.966865000 |
| C | 3.201977000  | 10.830667000 | 12.136180000 |
| H | 0.454157000  | 12.870379000 | 12.318740000 |
| H | 1.428075000  | 9.860527000  | 9.381324000  |
| H | 2.577120000  | 12.382952000 | 13.510249000 |
| H | 3.522885000  | 9.358124000  | 10.576459000 |
| H | 4.130410000  | 10.606051000 | 12.667135000 |
| O | -0.384704000 | 11.650289000 | 10.161247000 |
| H | -0.520376000 | 9.451314000  | 8.406455000  |
| H | -0.571176000 | 10.985735000 | 9.130360000  |

t) <sup>1</sup>F

No imaginary frequency.

|    |                   |                   |                   |
|----|-------------------|-------------------|-------------------|
| Fe | -1.98478275902634 | 8.14531378342664  | 8.81133948694087  |
| N  | -3.48347599870905 | 9.04895716581951  | 9.81078816238159  |
| N  | -3.24029471124623 | 7.81723465359203  | 7.27857752935062  |
| N  | -0.64284870518440 | 6.92148899247836  | 7.95798552107993  |
| N  | -0.89137641602479 | 8.14651373091202  | 10.49964243183098 |
| C  | -3.46270007632128 | 9.51522273589688  | 11.10968166762606 |
| C  | -4.68765105530295 | 9.47503567680114  | 9.28397147031694  |
| C  | -4.48728488009028 | 8.38320548255670  | 7.09477701343016  |
| C  | -2.98061683826687 | 7.10948312245554  | 6.12005518515838  |
| C  | -0.72884132319908 | 6.31880959937399  | 6.71776011860075  |
| C  | 0.40112636942713  | 7.67793493495451  | 10.64401837796590 |
| C  | -1.21720465844246 | 8.71807560523538  | 11.71500500751491 |
| C  | -4.66891909775462 | 10.25787491008375 | 11.39547700333223 |
| H  | -4.89947310726762 | 10.73817795879000 | 12.34201425205581 |
| C  | -5.42080796941942 | 10.24385798213115 | 10.25997275865289 |
| H  | -6.39015544576599 | 10.70517156849612 | 10.09225602509789 |

|   |                   |                   |                   |
|---|-------------------|-------------------|-------------------|
| C | -5.02693312473601 | 8.00662453908992  | 5.81118014145096  |
| H | -5.99970017038106 | 8.30488745929888  | 5.42987206646299  |
| C | -4.09250644550000 | 7.22411301514586  | 5.20431577341521  |
| H | -4.14784605599066 | 6.76572046841403  | 4.22150565455984  |
| C | 0.89586037204926  | 7.97182659893883  | 11.96811104401144 |
| C | -0.11535199140377 | 8.58918009938544  | 12.63933056569646 |
| H | -0.11729673769721 | 8.93462609032126  | 13.66925005674173 |
| C | -5.17115908778501 | 9.18731135928769  | 8.00761172088376  |
| C | -1.81066038086993 | 6.39880473141177  | 5.83630055602305  |
| C | -2.42614134470064 | 9.34305736488725  | 12.03101985800282 |
| C | -6.51176156909208 | 9.71921253336024  | 7.61271092496296  |
| C | -7.68248013553775 | 9.17212771423376  | 8.16220596585775  |
| H | -7.60167335945250 | 8.36068243923113  | 8.88959905679377  |
| C | -8.93788666936623 | 9.65309517935951  | 7.77842117584745  |
| C | -6.62003463124910 | 10.75893767141339 | 6.67594968756198  |
| H | -5.71180564503274 | 11.18786182282295 | 6.24566918369704  |
| C | -1.70984433536328 | 5.71617608068460  | 4.51112283216997  |
| C | -0.78001476718204 | 6.15553258731644  | 3.55287086455258  |
| H | -0.11203637014347 | 6.98516905347080  | 3.79610906092394  |
| C | -0.71603941806777 | 5.54974414697733  | 2.29506057138093  |
| H | 0.00596829481655  | 5.90787886411185  | 1.55662513611947  |
| C | -1.58410579108408 | 4.49943832465386  | 1.97600605093729  |
| H | -1.54100485607835 | 4.03127924956698  | 0.98928205188528  |
| C | -2.50703175324241 | 4.04834674969123  | 2.92614935699083  |
| H | -3.18336982513939 | 3.22429846304597  | 2.68441742512500  |
| C | -2.56730388988181 | 4.65132931542681  | 4.18570647752580  |
| H | -3.28720115388976 | 4.29917733348112  | 4.92840577089293  |
| C | -2.64602060050274 | 9.83899210977132  | 13.42305829213980 |
| C | -3.62960506351874 | 9.23456052669095  | 14.22470028602770 |
| H | -4.20319967830919 | 8.39585811251502  | 13.82286693982032 |
| C | -1.90925954459852 | 10.91382604276062 | 13.94710927143792 |
| H | -1.14640954005073 | 11.39309497762493 | 13.32908943389360 |
| C | -3.88128506955553 | 9.70263609223345  | 15.51676443613444 |

|   |                    |                   |                   |
|---|--------------------|-------------------|-------------------|
| H | -4.65078067240804  | 9.22366292786884  | 16.12759901430146 |
| C | -3.14999571261303  | 10.78131124753326 | 16.02634159974280 |
| H | -3.35734123634807  | 11.15727148461256 | 17.03180183646586 |
| C | -2.15910989427562  | 11.38129166967460 | 15.24124416208953 |
| H | -1.58242266665366  | 12.22257807054240 | 15.63461244329244 |
| C | -9.03710831220278  | 10.68771378271224 | 6.84058082225560  |
| H | -10.01670937551043 | 11.06526208573980 | 6.53453226284113  |
| C | -7.87510008988640  | 11.24133925553908 | 6.29144404913958  |
| H | -7.94671822937145  | 12.05224207825563 | 5.56194829325246  |
| H | 4.23532574752557   | 4.37618671967515  | 12.03653832097252 |
| H | 6.17223821695833   | 5.46892455133158  | 10.91552297050298 |
| C | 0.60770581378667   | 6.59708279206701  | 8.44569047723480  |
| C | 0.47311068088722   | 5.56591611288275  | 6.44592864665306  |
| H | 0.64824381840944   | 4.96870578481828  | 5.55545016130221  |
| C | 1.30435208903372   | 5.74721168660267  | 7.51013834664036  |
| H | 2.29318724018476   | 5.32515744727419  | 7.66722563951298  |
| H | 1.88427781419294   | 7.71706737516597  | 12.33983877703367 |
| C | 1.13067137862851   | 6.97148662995478  | 9.68564725914194  |
| C | 2.52528969310843   | 6.55013320457566  | 10.02089088743169 |
| C | 2.76065256744856   | 5.54598279111973  | 10.97428734810378 |
| H | 1.91107997984633   | 5.06663793096810  | 11.46607712669195 |
| C | 4.06564353389770   | 5.15973480963023  | 11.29351988634714 |
| C | 5.15314882888518   | 5.77286127596647  | 10.66090663568528 |
| C | 4.92757130461271   | 6.76889267285937  | 9.70349788693592  |
| H | 5.77008323768784   | 7.25235310877973  | 9.20226193294499  |
| C | 3.62158651175873   | 7.15464139978315  | 9.38488264419305  |
| H | 3.44304010070432   | 7.93387236719269  | 8.63969621396861  |
| H | -9.83946641622851  | 9.21331273390256  | 8.21323605786059  |
| C | -1.26839661012434  | 9.55800382104857  | 8.11714089245265  |
| O | -0.77401733080362  | 10.47038116229374 | 7.63275570374584  |

u)  $^3\text{F}$

One imaginary frequency of  $-14\text{ cm}^{-1}$ .

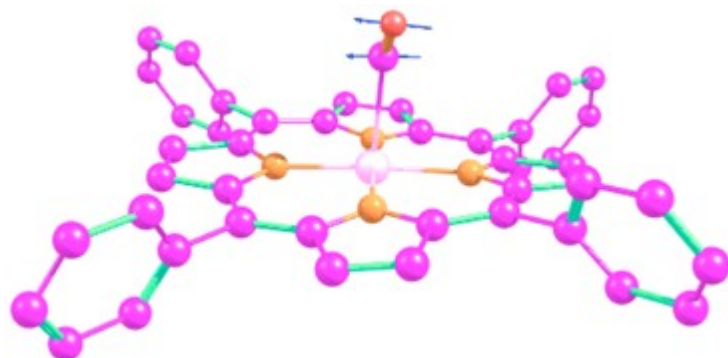

**Figure S25:** Normal mode of vibration associated with the imaginary frequency of  $-14\text{ cm}^{-1}$  in  ${}^3\text{F}$ . Blue arrows represent atom displacement vectors. For clarity, all hydrogens are omitted.

|    |                   |                   |                   |
|----|-------------------|-------------------|-------------------|
| Fe | -2.12347609872180 | 8.00968679397708  | 8.87064681543870  |
| N  | -3.59181812124668 | 8.97379029438367  | 9.84394046235982  |
| N  | -3.32373436456126 | 7.79898400076820  | 7.26960313081894  |
| N  | -0.71917341606248 | 6.89359565655513  | 7.96042870157468  |
| N  | -0.96944460954224 | 8.11769065410746  | 10.50853209104862 |
| C  | -3.50836396155304 | 9.57386264840861  | 11.08432808708500 |
| C  | -4.86058842661822 | 9.25291642639906  | 9.37266710030223  |
| C  | -4.62894149680158 | 8.23471904373626  | 7.14113887360870  |
| C  | -2.98293318572054 | 7.25900591336304  | 6.04558701029962  |
| C  | -0.74323959122248 | 6.43312625602573  | 6.66200054088010  |
| C  | 0.26626724702346  | 7.52887804600836  | 10.69827432547296 |
| C  | -1.22825322369210 | 8.83133697519262  | 11.65998331988024 |
| C  | -4.74300621168799 | 10.26045318946745 | 11.38523769387531 |
| H  | -4.93777282275813 | 10.83412725212581 | 12.28700453568479 |
| C  | -5.58461001304187 | 10.04881842593554 | 10.33362696127824 |
| H  | -6.59798505354246 | 10.41891346470961 | 10.20437329545024 |
| C  | -5.12084313630681 | 7.94623151105127  | 5.81521365523330  |
| H  | -6.12119389417915 | 8.16591008520537  | 5.45306747637492  |
| C  | -4.09257402523306 | 7.37237473373643  | 5.12848452644502  |
| H  | -4.09065835633960 | 7.03809190653546  | 4.09475728902558  |
| C  | 0.79741125873995  | 7.88861433121267  | 11.98948038564291 |

|   |                   |                   |                   |
|---|-------------------|-------------------|-------------------|
| C | -0.12736443392143 | 8.69310613041588  | 12.58606480503089 |
| H | -0.07582325526647 | 9.14091715639538  | 13.57419647086985 |
| C | -5.37505703848204 | 8.89739354067576  | 8.12086639168411  |
| C | -1.76476459140750 | 6.64702130015496  | 5.72779229195198  |
| C | -2.40281972770832 | 9.54113637429569  | 11.94366456599093 |
| C | -6.78253378390376 | 9.28563938292345  | 7.79798729170882  |
| C | -7.86152720588275 | 8.65313951445188  | 8.43731481138592  |
| H | -7.66139690449877 | 7.87440805165665  | 9.17748946975060  |
| C | -9.17820519620301 | 9.01073584379868  | 8.12989603551218  |
| C | -7.04928265040270 | 10.28797716826491 | 6.85041524478842  |
| H | -6.21494908870214 | 10.79035201922974 | 6.35568430733904  |
| C | -1.52928543685657 | 6.16650052054583  | 4.33360065310699  |
| C | -0.51251578583518 | 6.75638844126256  | 3.56287517752459  |
| H | 0.06652844596581  | 7.57997568251088  | 3.98756346536766  |
| C | -0.23569409949103 | 6.29275992168522  | 2.27423336537386  |
| H | 0.55916265157595  | 6.76073110930747  | 1.68783191242469  |
| C | -0.97358773841109 | 5.23204664524240  | 1.73712206396657  |
| H | -0.74576043848838 | 4.85801196968630  | 0.73536355060461  |
| C | -1.99699440717262 | 4.64627493282882  | 2.49081013009307  |
| H | -2.57821921750048 | 3.81802508864572  | 2.07687753642636  |
| C | -2.27277563329813 | 5.11014624345974  | 3.78074680195145  |
| H | -3.05883539831824 | 4.63877290397064  | 4.37522821971483  |
| C | -2.48454481163139 | 10.24701141967958 | 13.25772293608187 |
| C | -3.39703367288172 | 9.83150260893406  | 14.24361859335389 |
| H | -4.07454225937966 | 9.00133745910551  | 14.03095910900804 |
| C | -1.61241872479196 | 11.31033941096893 | 13.54934024576646 |
| H | -0.90509790649319 | 11.64392383994198 | 12.78621704610388 |
| C | -3.42934526978427 | 10.45817362039760 | 15.49237891538492 |
| H | -4.13778146895581 | 10.11669448967484 | 16.25170570606996 |
| C | -2.54570217315694 | 11.50551964041616 | 15.77690566504045 |
| H | -2.56194811484566 | 11.98818759488484 | 16.75742915189334 |
| C | -1.64030448210706 | 11.93392339871271 | 14.79982558242479 |
| H | -0.95216018202047 | 12.75584327448127 | 15.01380654103334 |



|   |                    |                   |                   |
|---|--------------------|-------------------|-------------------|
| C | -9.43383594257831  | 10.00497270332250 | 7.17817374973514  |
| H | -10.46146372730509 | 10.28631221701334 | 6.93197152697079  |
| C | -8.36488621211049  | 10.64465606801941 | 6.54048389986654  |
| H | -8.55730233009762  | 11.42656967220324 | 5.80127361120607  |
| H | 3.61194461439406   | 3.77144700233486  | 12.25886607525878 |
| H | 5.71843681711070   | 4.69823107240383  | 11.30337383711138 |
| C | 0.46083098286890   | 6.42578051327357  | 8.50691811638717  |
| C | 0.43067802892090   | 5.63298624770766  | 6.39805095890901  |
| H | 0.64868710407343   | 5.13054166120113  | 5.45976244932216  |
| C | 1.16833440927743   | 5.61694097108523  | 7.54520834402730  |
| H | 2.10894694331507   | 5.10506589046727  | 7.72954114530376  |
| H | 1.75412832773062   | 7.56112336761530  | 12.38707724874715 |
| C | 0.94107208560746   | 6.71156348063278  | 9.78689951889385  |
| C | 2.26276208936690   | 6.14384775044646  | 10.19451350274933 |
| C | 2.33360687430807   | 5.10206659577546  | 11.13292048588225 |
| H | 1.40986419016070   | 4.69951733653590  | 11.55579001916281 |
| C | 3.57065308390797   | 4.58362716060593  | 11.52838419034033 |
| C | 4.75263647867631   | 5.10308508529845  | 10.98865010662741 |
| C | 4.69109898558537   | 6.13892583083288  | 10.04891420382692 |
| H | 5.60856250223581   | 6.55220472732297  | 9.62126026975115  |
| C | 3.45334408380913   | 6.65517914171254  | 9.65369459700942  |
| H | 3.40213401105759   | 7.46738910200518  | 8.92448756974366  |
| H | -10.00596260160860 | 8.50606811042300  | 8.63482267377131  |
| C | -0.92170212697131  | 9.85724085217506  | 7.66410702430402  |
| O | -0.15546216840962  | 10.16459713207398 | 6.89590254258262  |

v)  $^5\text{F}$

No imaginary frequency.

|    |                   |                  |                  |
|----|-------------------|------------------|------------------|
| Fe | -1.96602827172305 | 8.26040214397503 | 8.77324985979341 |
| N  | -3.54685985391773 | 9.06438584060231 | 9.84454138102130 |
| N  | -3.30341374515900 | 7.82694279915033 | 7.20425226324610 |

|   |                   |                   |                   |
|---|-------------------|-------------------|-------------------|
| N | -0.61589251302727 | 6.93536074644817  | 7.91773761583902  |
| N | -0.85708701062620 | 8.17232389893393  | 10.55960208159209 |
| C | -3.47941397504341 | 9.57507097636342  | 11.12150427234255 |
| C | -4.76295196842351 | 9.43822115141045  | 9.31448993238942  |
| C | -4.57678949904120 | 8.32280026017972  | 7.08143713623933  |
| C | -3.01554514753982 | 7.14201089053324  | 6.05125892476754  |
| C | -0.70879558301455 | 6.37486091168257  | 6.66247729442642  |
| C | 0.39106044911337  | 7.62253059046736  | 10.70922020674119 |
| C | -1.19795309955953 | 8.75260905146811  | 11.75514164684444 |
| C | -4.68561011051472 | 10.32345942094697 | 11.39540379309373 |
| H | -4.90316753419146 | 10.85562051562549 | 12.31740111651907 |
| C | -5.47463357816025 | 10.24126911676997 | 10.28006785213285 |
| H | -6.45197112958040 | 10.69164884989717 | 10.12753292540049 |
| C | -5.12550235070226 | 7.92667139787887  | 5.79797751753891  |
| H | -6.12239760839559 | 8.16512506044714  | 5.43599690920250  |
| C | -4.15824781035994 | 7.21026996622786  | 5.15582063619026  |
| H | -4.21742175515011 | 6.76573849484801  | 4.16625500819559  |
| C | 0.87275638351163  | 7.88387354619041  | 12.05360345945887 |
| C | -0.11478123395552 | 8.56419932105189  | 12.70440685150662 |
| H | -0.11090727214055 | 8.90439311394984  | 13.73655821138471 |
| C | -5.25763217896013 | 9.09648499078595  | 8.03927855905333  |
| C | -1.80026808644528 | 6.48524747095548  | 5.77301450736630  |
| C | -2.40976428045189 | 9.41635355983390  | 12.03024933849518 |
| C | -6.62825385659408 | 9.57668676464730  | 7.67998661056433  |
| C | -7.76271164095990 | 9.03619655101050  | 8.30777276550245  |
| H | -7.63251828865427 | 8.26481770865700  | 9.07080744308662  |
| C | -9.04448489821695 | 9.47129406210202  | 7.95717477515830  |
| C | -6.80308814538133 | 10.56656292511397 | 6.69894066924319  |
| H | -5.92460627168173 | 10.99298394097238 | 6.20889462831679  |
| C | -1.65034308365548 | 5.85232930695979  | 4.42767025984258  |
| C | -0.68247588821335 | 6.33097026216670  | 3.52706062393346  |
| H | -0.04171182556688 | 7.16412827546827  | 3.82535142122016  |
| C | -0.54096443805948 | 5.75644751646273  | 2.26112241278953  |

|   |                    |                   |                   |
|---|--------------------|-------------------|-------------------|
| H | 0.21268163665780   | 6.14327547402864  | 1.57037049293531  |
| C | -1.36845754206499  | 4.69605725862706  | 1.87508089050503  |
| H | -1.25826373822837  | 4.24678256160346  | 0.88470001693391  |
| C | -2.33485685086320  | 4.21108746958544  | 2.76325854693163  |
| H | -2.98202963235456  | 3.38064010201632  | 2.46882795229830  |
| C | -2.47216528031538  | 4.78291976145549  | 4.03165996869910  |
| H | -3.21907891805579  | 4.39603364627257  | 4.72893119385681  |
| C | -2.60230050085134  | 9.96980475390824  | 13.40468044681375 |
| C | -3.61504174728957  | 9.45527498032299  | 14.23322037442150 |
| H | -4.24409588136260  | 8.64194434240821  | 13.86395839511647 |
| C | -1.79149590434631  | 11.00898777521436 | 13.89253487171393 |
| H | -1.00562993811014  | 11.41886117830449 | 13.25367243088538 |
| C | -3.81943393462769  | 9.97329672340867  | 15.51460644854469 |
| H | -4.60934461157099  | 9.56078496553756  | 16.14751903139005 |
| C | -3.01246634429998  | 11.01432295776971 | 15.98705270119685 |
| H | -3.17914900974824  | 11.42619579360169 | 16.98592214354020 |
| C | -1.99435366486754  | 11.52707695031048 | 15.17547071797467 |
| H | -1.35923890328171  | 12.33897539858898 | 15.53962822119068 |
| C | -9.20858923515932  | 10.45619572924188 | 6.97586990412209  |
| H | -10.20861194341887 | 10.79986668950227 | 6.69704936260204  |
| C | -8.08390761912825  | 11.00531786134383 | 6.34957472201556  |
| H | -8.20569327920753  | 11.77885233764990 | 5.58685070256139  |
| H | 4.06882353818967   | 4.17238041438179  | 12.10792121752288 |
| H | 6.05935449506871   | 5.19870827627228  | 11.01854066927224 |
| C | 0.60005038214942   | 6.56342731106806  | 8.44929206452533  |
| C | 0.48531696514987   | 5.60367379569821  | 6.40216597831114  |
| H | 0.67949723478399   | 5.02699524795049  | 5.50175976878521  |
| C | 1.29200175078464   | 5.72199147724012  | 7.50188927743252  |
| H | 2.26255590645475   | 5.25972988788962  | 7.66220584477687  |
| H | 1.83397228717933   | 7.57139386226642  | 12.45306283289706 |
| C | 1.09231732255928   | 6.89648550615691  | 9.72843241629308  |
| C | 2.46469449925363   | 6.41436246487701  | 10.07867535000840 |
| C | 2.65164675080888   | 5.39884171384932  | 11.03087490296947 |

|   |                   |                   |                   |
|---|-------------------|-------------------|-------------------|
| H | 1.77909731035951  | 4.94827452400215  | 11.50957581391590 |
| C | 3.93768443823261  | 4.96453938933444  | 11.36614805997749 |
| C | 5.05541484361521  | 5.53991128919904  | 10.75105387304602 |
| C | 4.87901105521627  | 6.54651126481054  | 9.79430056904542  |
| H | 5.74485870873144  | 7.00146457155020  | 9.30602085060486  |
| C | 3.59219445787447  | 6.97997305846308  | 9.46042137092321  |
| H | 3.45207732131580  | 7.76906511156490  | 8.71747233574495  |
| H | -9.91607608982264 | 9.03496871051484  | 8.45225386105077  |
| C | -0.98334908003489 | 9.89055756479614  | 7.80899765893208  |
| O | -0.34964915493325 | 10.57888244722688 | 7.17819283727599  |

w) <sup>1</sup>TS6

Three imaginary frequencies of -309, -14 and -5 cm<sup>-1</sup>.

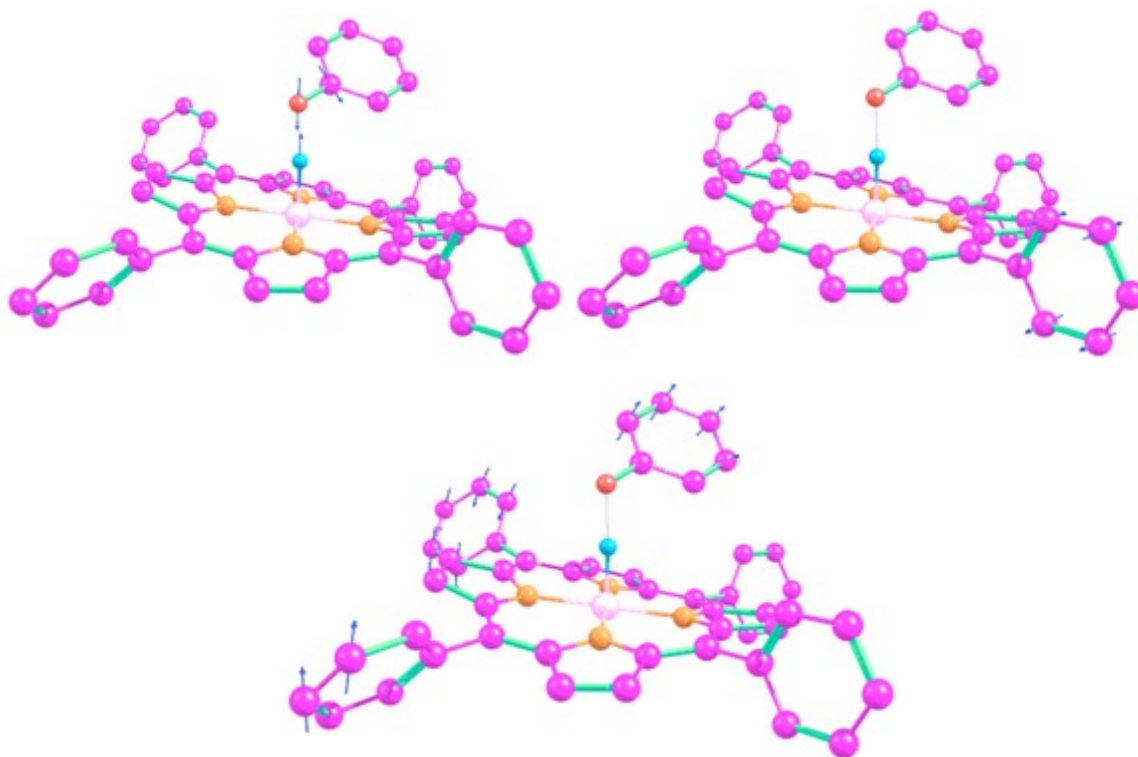

**Figure S26:** Normal mode of vibration associated with the imaginary frequency of -309 cm<sup>-1</sup> (top, left), -14 cm<sup>-1</sup> (top, right) and -5 cm<sup>-1</sup> (bottom) in <sup>1</sup>TS6. Blue arrows represent atom displacement vectors. For clarity, all hydrogens are omitted, except the transferred proton.

|    |              |              |              |
|----|--------------|--------------|--------------|
| Fe | -1.697466000 | 7.779170000  | 8.568521000  |
| N  | -2.865192000 | 9.247850000  | 9.217542000  |
| N  | -2.493307000 | 7.951814000  | 6.737148000  |
| N  | -0.697983000 | 6.164766000  | 7.981330000  |
| N  | -0.926355000 | 7.580883000  | 10.412268000 |
| C  | -2.859542000 | 9.834460000  | 10.480285000 |
| C  | -3.874803000 | 9.900520000  | 8.507159000  |
| C  | -3.450800000 | 8.860181000  | 6.316799000  |
| C  | -2.063953000 | 7.314056000  | 5.583442000  |
| C  | -0.629228000 | 5.647704000  | 6.690643000  |
| C  | 0.004541000  | 6.642786000  | 10.832063000 |
| C  | -1.032490000 | 8.488682000  | 11.454560000 |
| C  | -3.926469000 | 10.811284000 | 10.575090000 |
| H  | -4.165234000 | 11.389586000 | 11.464238000 |
| C  | -4.555595000 | 10.842733000 | 9.367564000  |
| H  | -5.403083000 | 11.455988000 | 9.069091000  |
| C  | -3.593809000 | 8.819552000  | 4.892212000  |
| H  | -4.267363000 | 9.442816000  | 4.309264000  |
| C  | -2.711387000 | 7.864967000  | 4.431247000  |
| H  | -2.536091000 | 7.551789000  | 3.404350000  |
| C  | 0.535432000  | 7.002937000  | 12.111048000 |
| C  | -0.103197000 | 8.163441000  | 12.495592000 |
| H  | 0.048819000  | 8.732291000  | 13.409360000 |
| C  | -4.162836000 | 9.738706000  | 7.161525000  |
| C  | -1.186265000 | 6.211255000  | 5.551572000  |
| C  | -1.977765000 | 9.541281000  | 11.515054000 |
| C  | -5.208981000 | 10.589810000 | 6.516395000  |
| C  | -6.414920000 | 10.026321000 | 6.064498000  |
| H  | -6.611991000 | 8.968307000  | 6.256668000  |
| C  | -7.352692000 | 10.797660000 | 5.370879000  |
| C  | -4.973835000 | 11.953325000 | 6.269022000  |
| H  | -4.037031000 | 12.401128000 | 6.609027000  |
| C  | -0.869703000 | 5.591386000  | 4.228808000  |

|   |              |              |              |
|---|--------------|--------------|--------------|
| C | 0.376762000  | 5.820894000  | 3.621600000  |
| H | 1.097506000  | 6.472557000  | 4.121772000  |
| C | 0.699450000  | 5.228774000  | 2.396336000  |
| H | 1.672174000  | 5.426246000  | 1.937325000  |
| C | -0.220023000 | 4.388938000  | 1.759077000  |
| H | 0.034789000  | 3.917377000  | 0.806004000  |
| C | -1.467870000 | 4.156697000  | 2.349605000  |
| H | -2.193192000 | 3.501952000  | 1.858962000  |
| C | -1.789566000 | 4.756832000  | 3.571385000  |
| H | -2.762325000 | 4.568451000  | 4.033395000  |
| C | -2.066630000 | 10.324592000 | 12.781550000 |
| C | -2.383712000 | 9.689025000  | 13.997084000 |
| H | -2.588167000 | 8.615881000  | 13.994679000 |
| C | -1.825400000 | 11.710259000 | 12.804066000 |
| H | -1.569463000 | 12.219821000 | 11.871590000 |
| C | -2.442540000 | 10.405762000 | 15.194354000 |
| H | -2.691497000 | 9.886218000  | 16.123897000 |
| C | -2.194720000 | 11.783774000 | 15.201723000 |
| H | -2.236774000 | 12.347883000 | 16.137122000 |
| C | -1.893801000 | 12.432897000 | 13.999727000 |
| H | -1.692954000 | 13.507800000 | 13.994051000 |
| C | -7.097603000 | 12.149708000 | 5.113657000  |
| H | -7.824607000 | 12.750655000 | 4.560862000  |
| C | -5.906280000 | 12.726121000 | 5.569294000  |
| H | -5.691506000 | 13.778642000 | 5.363406000  |
| H | 1.039942000  | 2.299750000  | 13.451224000 |
| H | 3.290963000  | 1.649452000  | 12.578927000 |
| C | 0.046092000  | 5.287952000  | 8.773447000  |
| C | 0.101324000  | 4.399368000  | 6.693334000  |
| H | 0.274992000  | 3.779054000  | 5.816860000  |
| C | 0.488480000  | 4.160816000  | 7.977233000  |
| H | 1.043928000  | 3.305909000  | 8.353701000  |
| H | 1.303704000  | 6.453322000  | 12.649921000 |

|   |              |              |              |
|---|--------------|--------------|--------------|
| C | 0.393535000  | 5.493416000  | 10.102772000 |
| C | 1.222922000  | 4.467182000  | 10.799745000 |
| C | 0.722895000  | 3.810042000  | 11.940262000 |
| H | -0.262497000 | 4.089543000  | 12.320736000 |
| C | 1.457798000  | 2.806560000  | 12.577035000 |
| C | 2.716579000  | 2.438718000  | 12.086904000 |
| C | 3.236245000  | 3.095063000  | 10.966033000 |
| H | 4.219035000  | 2.816559000  | 10.574720000 |
| C | 2.500469000  | 4.103871000  | 10.335661000 |
| H | 2.916945000  | 4.619203000  | 9.467111000  |
| H | -8.282343000 | 10.339035000 | 5.021849000  |
| H | -0.517260000 | 8.735830000  | 8.289864000  |
| C | 0.113067000  | 10.880155000 | 7.632581000  |
| C | 0.233853000  | 12.154749000 | 8.269257000  |
| C | -0.604426000 | 10.866043000 | 6.396501000  |
| C | -0.310651000 | 13.312160000 | 7.709987000  |
| C | -1.157203000 | 12.025178000 | 5.855565000  |
| C | -1.020407000 | 13.265474000 | 6.500108000  |
| H | 0.774247000  | 12.194638000 | 9.220606000  |
| H | -0.732580000 | 9.907281000  | 5.890372000  |
| H | -0.181041000 | 14.267794000 | 8.230175000  |
| H | -1.712225000 | 11.960087000 | 4.913338000  |
| H | -1.452601000 | 14.171159000 | 6.066116000  |
| O | 0.613576000  | 9.802201000  | 8.164334000  |

x)  $^1\mathbf{M}$

No imaginary frequency.

|    |                   |                  |                  |
|----|-------------------|------------------|------------------|
| Fe | -2.39866047041247 | 7.86485910863807 | 8.66026353570341 |
| N  | -3.74381221795533 | 9.13147153017439 | 9.42272253986664 |
| N  | -3.37504024774438 | 7.89237903078384 | 6.91629674586569 |
| N  | -1.18663045040802 | 6.43803518102667 | 7.95422828214372 |

|   |                   |                   |                   |
|---|-------------------|-------------------|-------------------|
| N | -1.55994125140243 | 7.67449352955412  | 10.46855186147007 |
| C | -3.87159725400564 | 9.53551523136820  | 10.73878798489102 |
| C | -4.68072775319498 | 9.86532530458731  | 8.71992003633106  |
| C | -4.36359091974293 | 8.78053428159444  | 6.53266024580926  |
| C | -3.12016662021137 | 7.12124507809578  | 5.79675580565828  |
| C | -1.22529044417277 | 5.83703704359836  | 6.70991721197933  |
| C | -0.40574168511992 | 6.97870043947871  | 10.78016285452967 |
| C | -1.95025510094777 | 8.28498367085992  | 11.64669588989753 |
| C | -4.92186611393715 | 10.52494067486523 | 10.86377471175090 |
| H | -5.22888696891979 | 10.99845362483475 | 11.79297421912690 |
| C | -5.41180174394854 | 10.74195761844922 | 9.60932888874598  |
| H | -6.20635456357798 | 11.41922905063101 | 9.30484856319747  |
| C | -4.72694923728986 | 8.56695148131068  | 5.14805935986567  |
| H | -5.46846343974623 | 9.13823464456103  | 4.59649296881929  |
| C | -3.97182364315612 | 7.52488073726204  | 4.69905929449184  |
| H | -3.97484083056969 | 7.07660515297998  | 3.70858963216065  |
| C | -0.05765996865638 | 7.17106997906026  | 12.17141876611556 |
| C | -1.03082471343854 | 7.95541931850034  | 12.71513348120204 |
| H | -1.11570963810730 | 8.29408472323352  | 13.74462964862208 |
| C | -4.94843946194288 | 9.75057928561513  | 7.35317268950208  |
| C | -2.12564834000324 | 6.14467749953894  | 5.68627217988792  |
| C | -3.05081429259229 | 9.13426539849358  | 11.79892237552688 |
| C | -5.91346496858617 | 10.70602133221090 | 6.72780048534763  |
| C | -7.18129175905989 | 10.28827052046191 | 6.29222521715866  |
| H | -7.49165312249716 | 9.25484207284543  | 6.46539462988880  |
| C | -8.03911295886582 | 11.17610699746917 | 5.63629574742920  |
| C | -5.53440714298803 | 12.04239503515473 | 6.51516356459440  |
| H | -4.55194159902874 | 12.37901614636704 | 6.85610506771476  |
| C | -1.97146881968083 | 5.43975814201311  | 4.37592144755201  |
| C | -0.89868270902763 | 5.75589293856492  | 3.52496455116163  |
| H | -0.17980580142608 | 6.51836320157326  | 3.83493327258068  |
| C | -0.74823864089171 | 5.10902441560991  | 2.29490078545405  |
| H | 0.08828970840118  | 5.37164712912482  | 1.64180330222085  |



|   |                   |                   |                   |
|---|-------------------|-------------------|-------------------|
| C | -1.67037267437671 | 4.13388365696325  | 1.89748187370879  |
| H | -1.55215734159885 | 3.62684501470127  | 0.93631880186969  |
| C | -2.74304014824597 | 3.81152388140531  | 2.73604833906723  |
| H | -3.46730985106500 | 3.05132182792290  | 2.43111157515703  |
| C | -2.89329797442438 | 4.46287426946635  | 3.96533912923448  |
| H | -3.73110430515692 | 4.21075152871168  | 4.62048518860498  |
| C | -3.35300627622928 | 9.67577226145088  | 13.16004907889150 |
| C | -4.48957053189941 | 9.23490594665253  | 13.85814979680271 |
| H | -5.13344739187156 | 8.47876709988383  | 13.40244096384512 |
| C | -2.52874388655472 | 10.64435312609137 | 13.75709431789534 |
| H | -1.64230828329435 | 10.99381778242712 | 13.22217604260457 |
| C | -4.80087285025508 | 9.75575621879229  | 15.11784955132201 |
| H | -5.68639438024749 | 9.39710976772769  | 15.64939147270195 |
| C | -3.98003026757218 | 10.72972812445407 | 15.69726373687071 |
| H | -4.23022938104187 | 11.14603364835735 | 16.67687854116283 |
| C | -2.84016643683571 | 11.17013656167046 | 15.01516206163819 |
| H | -2.19147034841288 | 11.92827756884240 | 15.46228745624879 |
| C | -7.64272047130564 | 12.49903637995776 | 5.41072512920173  |
| H | -8.30882856389389 | 13.19099345087665 | 4.88916989362263  |
| C | -6.38992826035282 | 12.93187591816709 | 5.85892356438795  |
| H | -6.06857776485089 | 13.96239660655436 | 5.68334995703829  |
| H | 2.79128881401262  | 3.11867669891548  | 12.47272358498503 |
| H | 4.96193509941463  | 3.98022589355559  | 11.59867856499722 |
| C | -0.10026314259460 | 5.87700426527972  | 8.59837447932650  |
| C | -0.16917768308930 | 4.85365400694219  | 6.58841163062880  |
| H | 0.00348035549981  | 4.22366423704111  | 5.71926656274222  |
| C | 0.53807399733652  | 4.89022753122994  | 7.75315498673702  |
| H | 1.40140800735626  | 4.29164397230821  | 8.03344743253362  |
| H | 0.80818835009002  | 6.74055223924178  | 12.66791168148039 |
| C | 0.31599695618004  | 6.16491829798030  | 9.90182071056747  |
| C | 1.59161317881138  | 5.54768214767718  | 10.37931620726292 |
| C | 1.59879197658646  | 4.49799397261515  | 11.31192220585970 |
| H | 0.64885674648725  | 4.11942421363615  | 11.69736069595628 |

|   |                   |                   |                   |
|---|-------------------|-------------------|-------------------|
| C | 2.80382586897914  | 3.93702707659602  | 11.74788457194821 |
| C | 4.02140111109776  | 4.41897290302907  | 11.25420895167950 |
| C | 4.02600420166249  | 5.46140526070129  | 10.31973627910880 |
| H | 4.97054672111328  | 5.84664853258295  | 9.92521382097395  |
| C | 2.81970850930133  | 6.01921241748321  | 9.88561021651351  |
| H | 2.82213054734290  | 6.83449040440639  | 9.15793963448882  |
| H | -9.01821913580551 | 10.83049601792704 | 5.29340318794536  |
| H | -1.45167277144145 | 8.97882653128152  | 8.25457908712204  |

y)  $^3\mathbf{M}$

No imaginary frequency.

|    |                   |                   |                   |
|----|-------------------|-------------------|-------------------|
| Fe | -2.37906595663253 | 7.86456181804942  | 8.62637879078843  |
| N  | -3.78257660207515 | 9.05047304639842  | 9.39925959454097  |
| N  | -3.37759736873811 | 7.83756465259298  | 6.87998672867007  |
| N  | -1.19908573301061 | 6.40121802047964  | 7.94468829530191  |
| N  | -1.60463409733052 | 7.62486165304709  | 10.47529493285308 |
| C  | -4.02240810764987 | 9.33311055126243  | 10.72829228349731 |
| C  | -4.66753424915122 | 9.81503154979880  | 8.67395098140348  |
| C  | -4.21491984080061 | 8.84456652021315  | 6.44570168865931  |
| C  | -3.12784969438790 | 7.03580971437176  | 5.79084847875106  |
| C  | -1.32539583798476 | 5.67180515142229  | 6.77907807212831  |
| C  | -0.37192431357155 | 7.07464227476031  | 10.74452446036797 |
| C  | -2.05377918587191 | 8.17305813191308  | 11.65529472940734 |
| C  | -5.12396277073440 | 10.26573082380709 | 10.84333926370958 |
| H  | -5.53170329999744 | 10.64221874492820 | 11.77808857159411 |
| C  | -5.50680386844233 | 10.58285966076168 | 9.57252393152820  |
| H  | -6.30021009002672 | 11.25954161865186 | 9.26530726569606  |
| C  | -4.44960108503833 | 8.69967907568762  | 5.02851446547401  |
| H  | -5.02890723398726 | 9.37709702219587  | 4.40780141125314  |
| C  | -3.81048935595808 | 7.55678788741640  | 4.63150225052804  |
| H  | -3.76853276185740 | 7.12846317430033  | 3.63323487930057  |

|   |                   |                   |                   |
|---|-------------------|-------------------|-------------------|
| C | -0.02412462030956 | 7.30393021136326  | 12.12710872028471 |
| C | -1.08671230864773 | 7.94430948128095  | 12.70344340049580 |
| H | -1.19280898702312 | 8.25911073310636  | 13.73846619347638 |
| C | -4.79629496923818 | 9.82391867883444  | 7.27368343665629  |
| C | -2.24134951317342 | 5.94262890622373  | 5.75393361449824  |
| C | -3.23428576577626 | 8.91641182257572  | 11.80837459608956 |
| C | -5.60193350336712 | 10.92276278913270 | 6.66795877194378  |
| C | -6.70543298281201 | 10.69014137598841 | 5.82686890871104  |
| H | -7.01995547340761 | 9.66609805037625  | 5.61589871735039  |
| C | -7.41594950397575 | 11.75658650596029 | 5.26762392351758  |
| C | -5.24695689214186 | 12.25761060019116 | 6.94662010302110  |
| H | -4.39286367826322 | 12.45495860473221 | 7.59850890689353  |
| C | -2.21924103925717 | 5.10404249618404  | 4.51808490893453  |
| C | -1.07373691560982 | 5.03096073697437  | 3.70496080545968  |
| H | -0.19126979025723 | 5.61536633812711  | 3.97503782482049  |
| C | -1.06105142631630 | 4.23495048337047  | 2.55562468397794  |
| H | -0.16093718106159 | 4.18703941705090  | 1.93696491142727  |
| C | -2.19827429938153 | 3.50439788879217  | 2.19347611769340  |
| H | -2.18966412248039 | 2.88486046196503  | 1.29303080324582  |
| C | -3.34884861695028 | 3.57865518171266  | 2.98609125286442  |
| H | -4.24199794641718 | 3.01357981399394  | 2.70594995116750  |
| C | -3.35883487661152 | 4.37091033474018  | 4.13840308514476  |
| H | -4.25608646116457 | 4.42011368990414  | 4.75998061897939  |
| C | -3.62322233157663 | 9.37374993299048  | 13.17819391014652 |
| C | -4.73018250421395 | 8.80248123709759  | 13.82750147546229 |
| H | -5.28932475943675 | 8.00767368828766  | 13.32771125977542 |
| C | -2.90947486469840 | 10.39334189077118 | 13.83063198176642 |
| H | -2.04944917959481 | 10.84669977082287 | 13.33200150473506 |
| C | -5.12089342106449 | 9.24636668769566  | 15.09468011464028 |
| H | -5.98259056548628 | 8.78874421978882  | 15.58788571918433 |
| C | -4.40903743096466 | 10.26906506761634 | 15.73144132499627 |
| H | -4.72280118482082 | 10.62626815408945 | 16.71607649171751 |
| C | -3.30024673157667 | 10.84005733177243 | 15.09639411260238 |

|   |                   |                   |                   |
|---|-------------------|-------------------|-------------------|
| H | -2.73731761106824 | 11.63856874370103 | 15.58718377479728 |
| C | -7.04650303092432 | 13.07683127448888 | 5.54750308951491  |
| H | -7.60607256712295 | 13.90724726435199 | 5.10951831774425  |
| C | -5.96162837458949 | 13.32382561463018 | 6.39646395567451  |
| H | -5.66222754923327 | 14.34925357916827 | 6.63101701886135  |
| H | 3.47101208245274  | 3.83755533792839  | 12.37203193150353 |
| H | 5.41690605176626  | 4.86746835599950  | 11.20930668837658 |
| C | -0.07449757798706 | 5.92626117480964  | 8.57842982413854  |
| C | -0.28471412245341 | 4.66295802056730  | 6.71566336661723  |
| H | -0.17177239971060 | 3.92151815111372  | 5.92924020563844  |
| C | 0.51413276697942  | 4.85252575812487  | 7.80543682515632  |
| H | 1.40120353009319  | 4.29188097853527  | 8.09066300190757  |
| H | 0.90236862994563  | 6.99513340089542  | 12.60437463579616 |
| C | 0.39729385688166  | 6.32891626636503  | 9.83636381482533  |
| C | 1.77223627247020  | 5.89931259683017  | 10.23130426437507 |
| C | 2.00254294179141  | 4.95068685524752  | 11.24096922461916 |
| H | 1.15078644745826  | 4.49702008377676  | 11.75241785843295 |
| C | 3.30624519125744  | 4.58058845505040  | 11.58741469607711 |
| C | 4.39973232741718  | 5.15751451045254  | 10.93138755066790 |
| C | 4.18152191769964  | 6.10128383829043  | 9.92070592487785  |
| H | 5.02730143396104  | 6.56011216606815  | 9.40156498207877  |
| C | 2.87777788109935  | 6.46473585999950  | 9.57097988994435  |
| H | 2.70432134417037  | 7.20280562504518  | 8.78369252921247  |
| H | -8.27074377951254 | 11.55203249097309 | 4.61751669634418  |
| H | -1.17006522851753 | 9.29326373401262  | 8.14043551468222  |

z) <sup>5</sup>M

No imaginary frequency.

|    |                   |                  |                  |
|----|-------------------|------------------|------------------|
| Fe | -2.35725879163164 | 7.88550640479806 | 8.61651247269013 |
| N  | -3.79843284926460 | 9.01654767300425 | 9.39857171134044 |
| N  | -3.40097175582004 | 7.79981629486618 | 6.91866674220755 |

|   |                   |                   |                   |
|---|-------------------|-------------------|-------------------|
| N | -1.22842079087695 | 6.36902719686054  | 7.97079957032403  |
| N | -1.60607506103081 | 7.63398207547571  | 10.44985461907787 |
| C | -4.07695341125894 | 9.26127601968640  | 10.73567338823083 |
| C | -4.67041154192802 | 9.80254382672828  | 8.66803451823174  |
| C | -4.18132996300477 | 8.85497376886512  | 6.45164454027918  |
| C | -3.16141520711991 | 6.96978029555267  | 5.83011882702375  |
| C | -1.39832614266605 | 5.58041219556843  | 6.83913249917190  |
| C | -0.33454770580341 | 7.13932557470922  | 10.70743423167037 |
| C | -2.07429616314467 | 8.16512228306072  | 11.64749583448411 |
| C | -5.16826619352307 | 10.16513682108217 | 10.84112938699101 |
| H | -5.59543402560701 | 10.52676580646475 | 11.77327080312630 |
| C | -5.52664455300000 | 10.52052365525543 | 9.54787098280574  |
| H | -6.31601159955137 | 11.20135681200530 | 9.23861899357261  |
| C | -4.37430174822490 | 8.70595658675591  | 5.02527946545279  |
| H | -4.89792390466763 | 9.40957413154921  | 4.38438580199196  |
| C | -3.79889251189946 | 7.52596197399912  | 4.65813133804425  |
| H | -3.75763051253375 | 7.08779804375019  | 3.66386939218826  |
| C | 0.01297347630473  | 7.40285847219038  | 12.08789631501222 |
| C | -1.07580244581953 | 7.97278663876516  | 12.67683584794039 |
| H | -1.18767668803470 | 8.27325786436376  | 13.71579133102392 |
| C | -4.74497321056894 | 9.84822727537840  | 7.24472099041461  |
| C | -2.32856410891969 | 5.85726515404042  | 5.80311093134680  |
| C | -3.26894301045985 | 8.84300305342004  | 11.82485275504083 |
| C | -5.49254849602229 | 10.98375364758168 | 6.63993522470502  |
| C | -6.57169961948022 | 10.80663548324415 | 5.75363814397445  |
| H | -6.90482934778167 | 9.79744634663006  | 5.50297516521670  |
| C | -7.23745807674643 | 11.90596957982551 | 5.20095940909445  |
| C | -5.12155832226317 | 12.30309933753264 | 6.97341853612662  |
| H | -4.29204398391209 | 12.46159730655407 | 7.66650785900370  |
| C | -2.31688355259187 | 5.01101567244018  | 4.57492378058642  |
| C | -1.15945443208175 | 4.88445190785432  | 3.78366289539725  |
| H | -0.25623323459106 | 5.42561386136380  | 4.07395675414713  |
| C | -1.16191953933538 | 4.09694805490021  | 2.62928485716784  |

|   |                   |                   |                   |
|---|-------------------|-------------------|-------------------|
| H | -0.25304925256559 | 4.01077791148740  | 2.02754209165736  |
| C | -2.32606540331676 | 3.42530240751586  | 2.23728734709234  |
| H | -2.32912340526327 | 2.81264822681193  | 1.33206715233595  |
| C | -3.48655135650449 | 3.54963030799178  | 3.00793233755970  |
| H | -4.40023151181745 | 3.03055412557150  | 2.70554559921666  |
| C | -3.48064121187110 | 4.33275343036399  | 4.16696616317541  |
| H | -4.38616442076470 | 4.42119120527354  | 4.77197703944202  |
| C | -3.67873735480434 | 9.27921043049644  | 13.19338409428640 |
| C | -4.78460064201922 | 8.68476351410514  | 13.82530988366214 |
| H | -5.32292263732777 | 7.88355622752112  | 13.31294843582140 |
| C | -2.99719217884652 | 10.31073790477955 | 13.86227154258822 |
| H | -2.14191684515405 | 10.78692548244496 | 13.37682891955631 |
| C | -5.20040419573372 | 9.11179399620725  | 15.09003592843970 |
| H | -6.05923665022679 | 8.63384026816167  | 15.56896909000597 |
| C | -4.51673628685695 | 10.14350804666175 | 15.74395369657292 |
| H | -4.85008973360254 | 10.48777963894989 | 16.72681210372760 |
| C | -3.41201494127492 | 10.74049923012217 | 15.12663142135264 |
| H | -2.87124237244484 | 11.54672909044255 | 15.62974070815738 |
| C | -6.84955021690501 | 13.20786824858015 | 5.53411644304820  |
| H | -7.37462018141038 | 14.06443958787803 | 5.10345690774453  |
| C | -5.79008052332231 | 13.40148340709738 | 6.42991803749824  |
| H | -5.47589649462505 | 14.41207140955648 | 6.70689465422045  |
| H | 3.62911683839552  | 4.01313640456835  | 12.30477382912811 |
| H | 5.52591612310511  | 5.09381287130779  | 11.10617760266106 |
| C | -0.08059775951715 | 5.91645849794138  | 8.59208616641238  |
| C | -0.38842990684110 | 4.57847643091417  | 6.79993868181612  |
| H | -0.29666698912798 | 3.80409953935358  | 6.04280878499913  |
| C | 0.45946290894104  | 4.81481839075386  | 7.87318655334137  |
| H | 1.35076621963961  | 4.25999822485979  | 8.15674381412905  |
| H | 0.95966570914321  | 7.14116037481762  | 12.55398681068048 |
| C | 0.43982528929065  | 6.40564885990194  | 9.82171087439379  |
| C | 1.83443828602564  | 6.02132670474306  | 10.18721244219103 |
| C | 2.11147119355169  | 5.07998256871955  | 11.19258731833419 |

|   |                   |                   |                   |
|---|-------------------|-------------------|-------------------|
| H | 1.28133678464092  | 4.60360718261198  | 11.71901385223692 |
| C | 3.43086170414953  | 4.74788791394035  | 11.51992338732330 |
| C | 4.49617614839005  | 5.35294520986067  | 10.84433306188264 |
| C | 4.23315241752778  | 6.28716459996308  | 9.83445348207663  |
| H | 5.05734270865153  | 6.76870249196374  | 9.30121026840428  |
| C | 2.91410690644145  | 6.61303708754087  | 9.50620326225783  |
| H | 2.70807776647557  | 7.34383531977471  | 8.71966199269177  |
| H | -8.07327552843115 | 11.74026286833832 | 4.51581154728637  |
| H | -1.27749484493256 | 9.19643107597966  | 8.12242956448613  |

aa) <sup>1</sup>N

No imaginary frequency.

|    |                   |                   |                   |
|----|-------------------|-------------------|-------------------|
| Fe | -1.46001808198874 | 9.10877332030085  | 7.68892273446824  |
| N  | -2.13286906682889 | 10.95954467109840 | 8.14135022976683  |
| N  | -2.26248995817463 | 9.29102867262209  | 5.83356791316675  |
| N  | -1.04904286953834 | 7.16862121878271  | 7.31507406252911  |
| N  | -0.94960601405195 | 8.82476159968460  | 9.62962756193166  |
| C  | -1.99548558262413 | 11.61277058031744 | 9.34654397472972  |
| C  | -2.79915014968520 | 11.83487594772032 | 7.31028253224115  |
| C  | -2.84578424045244 | 10.41335672862977 | 5.28819140979149  |
| C  | -2.15786849765334 | 8.37930956926300  | 4.80596337165019  |
| C  | -1.17240701929273 | 6.51988639800690  | 6.10585997089600  |
| C  | -0.40177035750549 | 7.68958568028025  | 10.18633182639975 |
| C  | -0.90099870211816 | 9.79056728006604  | 10.61113101618397 |
| C  | -2.61465925722050 | 12.92069262758754 | 9.28085017649463  |
| H  | -2.67064650906903 | 13.63015169632315 | 10.10259555981152 |
| C  | -3.11837768144628 | 13.05570827834884 | 8.02186347287736  |
| H  | -3.66701657603288 | 13.89816635312288 | 7.60908408819275  |
| C  | -3.09980384660733 | 10.20947970058514 | 3.87841335214425  |
| H  | -3.53917262469013 | 10.94168277196907 | 3.20604861768673  |
| C  | -2.66544859378821 | 8.95166659243881  | 3.57788295253813  |

|   |                   |                   |                   |
|---|-------------------|-------------------|-------------------|
| H | -2.68122356227564 | 8.45458361914211  | 2.61143865758233  |
| C | 0.02120690246603  | 7.95286600601800  | 11.54421989040541 |
| C | -0.28229849394997 | 9.25701349627357  | 11.80516036740585 |
| H | -0.10122090624854 | 9.81228152568371  | 12.72171181072736 |
| C | -3.12553301865210 | 11.60757750668856 | 5.96724703808481  |
| C | -1.64246598625870 | 7.07982874658403  | 4.91060048840570  |
| C | -1.38249298565558 | 11.10218889393873 | 10.49830891102210 |
| C | -3.79775049043360 | 12.70724654361691 | 5.20970512800598  |
| C | -5.12567183882924 | 12.57076387608201 | 4.77080617137861  |
| H | -5.66897209629921 | 11.64882051719545 | 4.99221928432469  |
| C | -5.75333245778763 | 13.60121662065866 | 4.06425124743910  |
| C | -3.11186541608316 | 13.89937098604326 | 4.92105722546057  |
| H | -2.07702589189535 | 14.01311675037791 | 5.25279972045085  |
| C | -1.60879680743362 | 6.22682422598558  | 3.68301356471652  |
| C | -0.37929485263971 | 5.86105625792061  | 3.10889022665052  |
| H | 0.54829046498628  | 6.21664788536026  | 3.56435514493770  |
| C | -0.33576242007422 | 5.05578348792138  | 1.96703521919992  |
| H | 0.62935383293191  | 4.78400824288953  | 1.53120113252158  |
| C | -1.52294056919224 | 4.60141898354654  | 1.38251432159164  |
| H | -1.48976106083750 | 3.97074710990554  | 0.49025558109628  |
| C | -2.75273954370308 | 4.95896808521599  | 1.94601166363283  |
| H | -3.68479635417155 | 4.60494464949349  | 1.49758373185652  |
| C | -2.79469717599724 | 5.76551966429796  | 3.08730277393921  |
| H | -3.75598344248989 | 6.03736967638232  | 3.53003800231017  |
| C | -1.26114169661147 | 12.00383115122765 | 11.68498787567265 |
| C | -2.00160924666343 | 11.76251499446524 | 12.85461312165341 |
| H | -2.67709631675619 | 10.90436034515861 | 12.89177737555453 |
| C | -0.40195198132661 | 13.11513438357965 | 11.64884065191629 |
| H | 0.17924035855193  | 13.31074101239652 | 10.74434069521987 |
| C | -1.88514472805868 | 12.60972420014602 | 13.96053860776778 |
| H | -2.47188018050883 | 12.40919057983382 | 14.86098563134268 |
| C | -1.02396903444637 | 13.71153760890134 | 13.91453624623019 |
| H | -0.93116141899143 | 14.37323012005447 | 14.77979804726831 |



|   |                   |                   |                   |
|---|-------------------|-------------------|-------------------|
| C | -0.28183232261466 | 13.96141375439954 | 12.75505843121355 |
| H | 0.39581370087032  | 14.81828719046670 | 12.71146054927464 |
| C | -5.06069244070814 | 14.78380305980362 | 3.78281174247388  |
| H | -5.55045286288930 | 15.58951454011755 | 3.22975037121222  |
| C | -3.73731755747197 | 14.92968557634101 | 4.21323418170421  |
| H | -3.18721754351845 | 15.84871296254598 | 3.99420663167462  |
| H | -0.36781888924954 | 3.23931159957206  | 12.93694909471805 |
| H | 1.91802380950620  | 2.39531013860034  | 12.38833559455123 |
| C | -0.56011781754045 | 6.22995039725726  | 8.19941160747702  |
| C | -0.77681335879978 | 5.13257612840977  | 6.23931533012339  |
| H | -0.80323291771721 | 4.39355274555662  | 5.44257810801313  |
| C | -0.40581805542075 | 4.95100534598579  | 7.53799490729995  |
| H | -0.06661297837697 | 4.03488802409245  | 8.01441381114727  |
| H | 0.49861746863856  | 7.23370260277317  | 12.20450188632636 |
| C | -0.23174147782139 | 6.45708525529150  | 9.54129715554608  |
| C | 0.35836550669301  | 5.32977637087450  | 10.32572685524834 |
| C | -0.35385556473632 | 4.73956848770524  | 11.38321543535006 |
| H | -1.35421101864211 | 5.10734383285919  | 11.62421414791179 |
| C | 0.20225860889839  | 3.68961699724946  | 12.11996843956719 |
| C | 1.48195754241748  | 3.21524773391974  | 11.81165024295015 |
| C | 2.20037502607110  | 3.79598242719075  | 10.76059355082295 |
| H | 3.20212716334569  | 3.43376645578943  | 10.51487945152024 |
| C | 1.64237602424438  | 4.84480974543041  | 10.02407824180306 |
| H | 2.20651034534740  | 5.30102331631918  | 9.20693057212770  |
| H | -6.78864311307663 | 13.48106290962387 | 3.73455921653555  |
| H | 1.34472152708363  | 8.35715788568019  | 8.06578882362232  |
| C | 1.46055247990823  | 9.25146001096776  | 7.41588608877923  |
| O | 0.36209327878496  | 9.82361373022292  | 7.08020572843204  |
| O | 2.59601591087745  | 9.60599100482021  | 7.08651500730111  |

bb)<sup>3</sup>N

No imaginary frequency.

|    |                   |                   |                   |
|----|-------------------|-------------------|-------------------|
| Fe | -1.37705219519280 | 9.16757674848067  | 7.67199062943863  |
| N  | -2.05972711644821 | 11.02016250741394 | 8.12045602960334  |
| N  | -2.14938933400743 | 9.35970938336756  | 5.81421021560422  |
| N  | -0.96445226528822 | 7.22352126869930  | 7.29967994971968  |
| N  | -0.87892474261654 | 8.87409175980068  | 9.60794687449820  |
| C  | -1.94686194925520 | 11.66187366448813 | 9.33511543266509  |
| C  | -2.74181193152682 | 11.88875978466692 | 7.29393214425917  |
| C  | -2.74958194640730 | 10.47526130671126 | 5.27017361612596  |
| C  | -2.05871594467486 | 8.44051161256133  | 4.79027077125583  |
| C  | -1.10602300845905 | 6.57107493365517  | 6.09338006801110  |
| C  | -0.33276875653255 | 7.73834033887587  | 10.16797554292518 |
| C  | -0.83479225172722 | 9.84144356004697  | 10.58894119115647 |
| C  | -2.59154491196748 | 12.95581329940681 | 9.27596320208064  |
| H  | -2.66971176468522 | 13.65407557620706 | 10.10551319862631 |
| C  | -3.08773370434011 | 13.09537709396187 | 8.01289258014498  |
| H  | -3.64928657095520 | 13.93007461066255 | 7.60160693238439  |
| C  | -3.00724323255535 | 10.26641622929488 | 3.86284288486611  |
| H  | -3.45142336965227 | 10.99392987457905 | 3.18944605582278  |
| C  | -2.57401022008414 | 9.00760763720465  | 3.56580266010870  |
| H  | -2.59727958408530 | 8.50424532966765  | 2.60280925332393  |
| C  | 0.10295637072718  | 8.00869485889744  | 11.51871044136806 |
| C  | -0.20276073866694 | 9.31274580194600  | 11.77742990967809 |
| H  | -0.00931376157622 | 9.87167975102673  | 12.68894199274391 |
| C  | -3.06457281439493 | 11.65938296893710 | 5.95146420902180  |
| C  | -1.57512744727314 | 7.13113675469315  | 4.89891767196856  |
| C  | -1.34043681378307 | 11.14565306726177 | 10.48786130869052 |
| C  | -3.79568902987606 | 12.71647563593493 | 5.19001157249579  |
| C  | -5.10384235987435 | 12.47697165209878 | 4.73497771265237  |
| H  | -5.58773664088676 | 11.52944175447073 | 4.98464619424313  |
| C  | -5.77980051903077 | 13.43000974916849 | 3.96880927064826  |
| C  | -3.18756529911361 | 13.94428355427341 | 4.87885377049389  |
| H  | -2.17100415988793 | 14.14123448175548 | 5.22817035828098  |

|   |                   |                   |                   |
|---|-------------------|-------------------|-------------------|
| C | -1.61000842257027 | 6.25669107253124  | 3.68592723101382  |
| C | -0.41818572037801 | 5.85360289725673  | 3.06120954874034  |
| H | 0.53600977010326  | 6.20884700419069  | 3.45925623985872  |
| C | -0.44870059222993 | 5.01176861770180  | 1.94449597179054  |
| H | 0.48586337663219  | 4.70308806989443  | 1.46811023369062  |
| C | -1.67195578044660 | 4.56082511793259  | 1.43654198410380  |
| H | -1.69641370318346 | 3.90131898357673  | 0.56512265744225  |
| C | -2.86515509393523 | 4.96078737169528  | 2.04902041039401  |
| H | -3.82341029356165 | 4.60835743146190  | 1.65717620628475  |
| C | -2.83349692539760 | 5.80200047975210  | 3.16568522348860  |
| H | -3.76363471678770 | 6.10706221652186  | 3.65222073240924  |
| C | -1.27123481124009 | 12.01053456132471 | 11.70476059666871 |
| C | -2.00472785414106 | 11.67483595218675 | 12.85640932373087 |
| H | -2.64478744690127 | 10.78943703695847 | 12.84133007453721 |
| C | -0.46047835026500 | 13.15787236566525 | 11.73193608109465 |
| H | 0.11078082031043  | 13.43085810592270 | 10.84133979206695 |
| C | -1.91316395820352 | 12.45281105485641 | 14.01345245801813 |
| H | -2.48684090404952 | 12.17027361001351 | 14.90037733939787 |
| C | -1.08718445257456 | 13.58297023256278 | 14.03584758341230 |
| H | -1.00204651082228 | 14.18586123668771 | 14.94367005543504 |
| C | -0.36604787107714 | 13.93634551397114 | 12.88977412889381 |
| H | 0.27840491328609  | 14.81922878554423 | 12.89857446523993 |
| C | -5.15952740651682 | 14.64406049228592 | 3.65226291837257  |
| H | -5.68368332357749 | 15.38838400508187 | 3.04738526715495  |
| C | -3.86315980777335 | 14.89964782235641 | 4.11329459496432  |
| H | -3.37000863122317 | 15.84323685849102 | 3.86451885520687  |
| H | -0.42532338583023 | 3.34561080003058  | 12.99127790685098 |
| H | 1.74890805004429  | 2.30216320412512  | 12.34302627800676 |
| C | -0.51195880892661 | 6.27304135692486  | 8.19205492879362  |
| C | -0.75109676335634 | 5.17632266823493  | 6.23497481754198  |
| H | -0.79787347261071 | 4.43532662349734  | 5.44114246301728  |
| C | -0.39398621702190 | 4.98822425668559  | 7.53680112695411  |
| H | -0.08381029925510 | 4.06406831198797  | 8.01653143773390  |

|   |                   |                   |                   |
|---|-------------------|-------------------|-------------------|
| H | 0.59002071457198  | 7.29338794733972  | 12.17555574340487 |
| C | -0.18798737879319 | 6.49607792518503  | 9.53611588018044  |
| C | 0.35280558361327  | 5.35154561331135  | 10.32800992714356 |
| C | -0.35557869098496 | 4.83264846144626  | 11.42552404134675 |
| H | -1.31044265057530 | 5.28385871732859  | 11.70690337541402 |
| C | 0.14368641766872  | 3.74356958678113  | 12.14687730945161 |
| C | 1.35984298349048  | 3.15562705985122  | 11.78157079717576 |
| C | 2.07540093956421  | 3.66714666216846  | 10.69318444974181 |
| H | 3.02523662518802  | 3.21365040914281  | 10.39720640878576 |
| C | 1.57797272530465  | 4.75903800116538  | 9.97715598108995  |
| H | 2.14116383201228  | 5.16396506264369  | 9.13314110818207  |
| H | -6.79218709082435 | 13.22091198547955 | 3.61260529574796  |
| H | 1.50125161934636  | 8.46724847442986  | 8.15138313284821  |
| C | 1.68232770931910  | 9.34785641909664  | 7.49109435467556  |
| O | 0.62396968071280  | 9.92591003218813  | 7.06829436694500  |
| O | 2.85400601796420  | 9.66079464431469  | 7.24338683465059  |

cc) <sup>5</sup>N

No imaginary frequency.

|    |                   |                   |                   |
|----|-------------------|-------------------|-------------------|
| Fe | -1.05904940552515 | 9.2788889094935   | 7.57227304316516  |
| N  | -2.05443331612089 | 11.08345908787547 | 8.11469856879254  |
| N  | -2.17865093702856 | 9.35216387883749  | 5.76337231803465  |
| N  | -0.94713385389887 | 7.17140884208566  | 7.27766358914170  |
| N  | -0.92121085853294 | 8.86248719813173  | 9.65909340155610  |
| C  | -1.99656660701915 | 11.69065981723116 | 9.34341391362237  |
| C  | -2.71435336344941 | 11.93666850665329 | 7.26764160193868  |
| C  | -2.74874775712307 | 10.47867410640553 | 5.22502599147757  |
| C  | -2.12695435459297 | 8.40720568222275  | 4.76790285551179  |
| C  | -1.14083529865052 | 6.51653073166423  | 6.08815535795522  |
| C  | -0.33155962496750 | 7.74204488646319  | 10.19018653630813 |
| C  | -0.90079953733409 | 9.83255212333797  | 10.63055344576469 |

|   |                   |                   |                   |
|---|-------------------|-------------------|-------------------|
| C | -2.65410978653969 | 12.98311321360566 | 9.27493056010396  |
| H | -2.78476951892974 | 13.67166802903443 | 10.10642585119316 |
| C | -3.09820931743036 | 13.13567694673398 | 7.99033123958524  |
| H | -3.65510512849337 | 13.97281407256343 | 7.57625714634739  |
| C | -3.03887991558569 | 10.24974609330260 | 3.82106959484044  |
| H | -3.47118164432620 | 10.97325566142990 | 3.13491058943558  |
| C | -2.65357075177550 | 8.96913525929442  | 3.53911365878866  |
| H | -2.71826296265759 | 8.45503483603862  | 2.58332998363215  |
| C | 0.10644200802990  | 8.02116498329703  | 11.54459963078970 |
| C | -0.24403078533308 | 9.31391749485496  | 11.81700583089531 |
| H | -0.05522345617124 | 9.86705032373252  | 12.73334448872343 |
| C | -3.01820588874166 | 11.68343029079058 | 5.91263635714756  |
| C | -1.64963794901129 | 7.08666502630976  | 4.90212824706817  |
| C | -1.42379389819816 | 11.14033853906388 | 10.51121458330222 |
| C | -3.71555429218535 | 12.75830588454310 | 5.14315438690735  |
| C | -5.01817550005074 | 12.55007392786153 | 4.65659748572902  |
| H | -5.52387508477586 | 11.60753082683938 | 4.87974315047059  |
| C | -5.66419759036404 | 13.52979496178573 | 3.89829947499977  |
| C | -3.08402966131806 | 13.98389802290987 | 4.86894941552916  |
| H | -2.07178242803217 | 14.15798595948758 | 5.24224548877172  |
| C | -1.71237820942247 | 6.20100733169264  | 3.69770524476295  |
| C | -0.53201222637069 | 5.77559028201126  | 3.06494340162990  |
| H | 0.43053269864305  | 6.12042763675102  | 3.45200373024928  |
| C | -0.58374572332469 | 4.92837629017864  | 1.95330969914505  |
| H | 0.34240289628475  | 4.60427007343744  | 1.47073036365114  |
| C | -1.81778990595147 | 4.49310494399966  | 1.45774472450857  |
| H | -1.85953419719089 | 3.82945054234264  | 0.59013946410314  |
| C | -2.99964115734621 | 4.91461907416873  | 2.07771106503010  |
| H | -3.96612350390015 | 4.57431298084388  | 1.69537484526745  |
| C | -2.94647591982280 | 5.76183459235251  | 3.18920009088428  |
| H | -3.86808657530441 | 6.08369418323737  | 3.68112511539291  |
| C | -1.38367765534405 | 11.99323365504369 | 11.73751097100181 |
| C | -2.07938469438492 | 11.60682701464233 | 12.89751250289905 |

|   |                   |                   |                   |
|---|-------------------|-------------------|-------------------|
| H | -2.68089201948210 | 10.69506504845773 | 12.87876887928323 |
| C | -0.62711212021951 | 13.17771197643741 | 11.77195695145063 |
| H | -0.08318080663894 | 13.49105690808284 | 10.87763925083069 |
| C | -2.00008968693327 | 12.36736848989188 | 14.06684582806558 |
| H | -2.54455279707008 | 12.04441807854053 | 14.95840187032779 |
| C | -1.22446383794890 | 13.53225099376630 | 14.09555639084508 |
| H | -1.14727948666254 | 14.12156839004036 | 15.01294309690770 |
| C | -0.54495892482956 | 13.93895278377565 | 12.94173436877599 |
| H | 0.05992466485110  | 14.84942114077237 | 12.95453537684881 |
| C | -5.02047446872918 | 14.74104254983101 | 3.62026624322854  |
| H | -5.52196327558664 | 15.50643287997210 | 3.02244573751823  |
| C | -3.72952211222131 | 14.96608304480680 | 4.11147195153539  |
| H | -3.21745107924398 | 15.90718033343859 | 3.89342851416081  |
| H | -0.22914543846958 | 3.38088499002675  | 13.01404135460237 |
| H | 1.93344899852753  | 2.35792309520419  | 12.29830347961951 |
| C | -0.47955247553224 | 6.24996152495127  | 8.17895196918912  |
| C | -0.78827596101086 | 5.11719350282701  | 6.24188469021666  |
| H | -0.86808836539518 | 4.35623754662738  | 5.46911915335165  |
| C | -0.38508695883832 | 4.95043371565645  | 7.53724681921557  |
| H | -0.06845424382554 | 4.02760321679801  | 8.01682946825542  |
| H | 0.62923913784775  | 7.32715414465230  | 12.19764290417295 |
| C | -0.15024652083225 | 6.50751052297681  | 9.52818022932345  |
| C | 0.43285724553458  | 5.37828597907572  | 10.31209843137728 |
| C | -0.22965754264477 | 4.85871490197095  | 11.43833335704411 |
| H | -1.17965778561749 | 5.30037310711944  | 11.74937437461723 |
| C | 0.30633670535605  | 3.78006339891619  | 12.14847436421895 |
| C | 1.51538712111487  | 3.20273238325841  | 11.74471222297281 |
| C | 2.18702441127430  | 3.71507355718599  | 10.62906568236372 |
| H | 3.13157446029724  | 3.27058113193764  | 10.30388203514955 |
| C | 1.65151928600804  | 4.79522846228843  | 9.92269816748579  |
| H | 2.18046842202800  | 5.20029605385815  | 9.05685285508080  |
| H | -6.67326437457999 | 13.34483050400976 | 3.51999196163924  |
| H | 1.67988239908852  | 8.47238401699784  | 8.23136860199617  |

|   |                  |                  |                  |
|---|------------------|------------------|------------------|
| C | 1.87116959292012 | 9.33081041013133 | 7.54940075881672 |
| O | 0.80730186284720 | 9.90355726290527 | 7.08999086053117 |
| O | 3.02992504418496 | 9.64979891677190 | 7.29754437692593 |

8) Cartesian coordinates of the other compounds investigated in the studies

a)  $^{24}\text{O}$

|   |                   |                   |                   |
|---|-------------------|-------------------|-------------------|
| C | 14.80882517284594 | 9.90434790250516  | -5.60356514427484 |
| C | 13.57873445034695 | 10.52213018911017 | -5.82830248432907 |
| C | 12.41640514803837 | 9.73830413916790  | -5.97008485720541 |
| C | 13.71850668102655 | 7.70914996693548  | -5.70258102395760 |
| C | 12.48844006224268 | 8.33020541495615  | -5.91096932808322 |
| H | 13.51569207287615 | 11.61156595351947 | -5.88910035820508 |
| H | 11.45371094981788 | 10.22623248040428 | -6.13842045350007 |
| H | 11.58431087767072 | 7.72963480588755  | -6.03423066581781 |
| C | 14.07053239963198 | 6.32861389809331  | -5.62963696950314 |
| C | 16.10608360311518 | 10.45173390814024 | -5.40096167198676 |
| N | 14.85061649783622 | 8.50980585779683  | -5.53081264798847 |
| N | 15.38340225253426 | 6.15085213676871  | -5.40441542428921 |
| N | 17.04635982750624 | 9.50781068910583  | -5.18052642129650 |
| C | 16.00629901698806 | 4.83510846654312  | -5.41654986520346 |
| C | 19.39984424100911 | 8.75419702542797  | -4.87953213011657 |
| C | 17.40858326832212 | 4.93490457851744  | -6.03095259496960 |
| C | 18.47339215238545 | 5.60823438958029  | -5.15748231594634 |
| C | 19.04450460196241 | 7.65887724569232  | -3.87865319944050 |
| N | 17.96432865889053 | 6.77281596779573  | -4.38002706040199 |
| H | 15.41393520222814 | 4.11723550623557  | -6.00371855528503 |
| H | 16.06778430745071 | 4.42547584854368  | -4.38941775426077 |
| H | 17.77244316967329 | 3.92441919786038  | -6.27840320505218 |
| H | 17.31217076785346 | 5.48148244160544  | -6.98370526582346 |

|    |                   |                   |                   |
|----|-------------------|-------------------|-------------------|
| H  | 19.29163164159478 | 5.96442631701881  | -5.79855620350611 |
| H  | 18.90529110085327 | 4.88200521380146  | -4.44775964213607 |
| H  | 17.49297895696751 | 6.38875405794465  | -3.56438073696667 |
| H  | 19.93376338934972 | 7.05339376176518  | -3.63588408337479 |
| H  | 18.68869590560737 | 8.11091809503751  | -2.94054519877843 |
| H  | 20.39104665383099 | 9.15733388589010  | -4.61638648482907 |
| H  | 19.49574503089461 | 8.31122815347101  | -5.88568973696237 |
| Co | 16.41164767511214 | 7.71947458905384  | -5.19325342695437 |
| C  | 16.41687406361178 | 11.91768254051968 | -5.43751333301420 |
| H  | 16.83655086302681 | 12.27836313336258 | -4.48145601157421 |
| H  | 17.16703403823897 | 12.15573299760528 | -6.21173050966578 |
| H  | 15.51755627396503 | 12.50825766944207 | -5.65879670529371 |
| C  | 13.10388390321580 | 5.19716281018232  | -5.80865244794074 |
| H  | 13.35790902513513 | 4.57519200288616  | -6.68554543149879 |
| H  | 13.09757768589054 | 4.52102772201995  | -4.93622901955558 |
| H  | 12.08190693380991 | 5.57317773454966  | -5.95434360264448 |
| C  | 18.41607431036462 | 9.92368020387381  | -4.91159394587392 |
| H  | 18.46409603161316 | 10.45250965450334 | -3.93871743161843 |
| H  | 18.75913969966409 | 10.64798783087891 | -5.67101366587477 |

b)  $^2G$

|   |                   |                   |                   |
|---|-------------------|-------------------|-------------------|
| C | 14.77640396460733 | 9.84754243154049  | -5.57090231794701 |
| C | 13.57342650026656 | 10.48064635521618 | -5.89407531633891 |
| C | 12.42671641186073 | 9.69749740515818  | -6.10195289594898 |
| C | 13.70926668148171 | 7.69634661310489  | -5.69285304410848 |
| C | 12.48808369553664 | 8.29516860653483  | -6.00412556475650 |
| H | 13.52152217354643 | 11.56682942248103 | -5.98580299672373 |
| H | 11.48119773353664 | 10.18286882886966 | -6.35218630006854 |
| H | 11.59696115238465 | 7.69008284870227  | -6.17673358776297 |
| C | 14.06432077332189 | 6.28772734131449  | -5.57064224312461 |
| C | 16.09062287234002 | 10.40702453555267 | -5.30863905432227 |
| N | 14.79919830999404 | 8.48838550389554  | -5.48547912311496 |



|    |                   |                   |                   |
|----|-------------------|-------------------|-------------------|
| N  | 15.32416268340964 | 6.10873962294936  | -5.22830498685491 |
| N  | 17.00884925736015 | 9.49937173687322  | -5.02345913417241 |
| C  | 15.97913217286173 | 4.80963159118730  | -5.22291073755382 |
| C  | 19.37986544724194 | 8.76385841800121  | -4.83539690505344 |
| C  | 17.29347583713024 | 4.91375037464434  | -6.01387369249872 |
| C  | 18.45076935506867 | 5.63619743481228  | -5.30438873874053 |
| C  | 19.11747066951085 | 7.57403604419628  | -3.91811198869681 |
| N  | 18.00949743586294 | 6.71004185515832  | -4.38545185025297 |
| H  | 15.34401899739136 | 4.03642305847626  | -5.67621132048050 |
| H  | 16.17321155430989 | 4.50941667144185  | -4.17841448242991 |
| H  | 17.63581050836133 | 3.89968252304770  | -6.27318615761856 |
| H  | 17.06049329900172 | 5.41989755605646  | -6.96467085060152 |
| H  | 19.11908051757760 | 6.07688521022477  | -6.05773628921316 |
| H  | 19.04793933623548 | 4.91241621512099  | -4.72233183313261 |
| H  | 17.60889907579796 | 6.28076020370321  | -3.54829351763263 |
| H  | 20.03382046600505 | 6.96873303284594  | -3.81516627014639 |
| H  | 18.84615895896848 | 7.93187967562996  | -2.91340267420815 |
| H  | 20.37104703746807 | 9.17560867104546  | -4.58636248294008 |
| H  | 19.43365144649490 | 8.41969821073968  | -5.88240582790718 |
| Co | 16.34086383986200 | 7.69850436327149  | -4.89297133283849 |
| C  | 16.36966836465592 | 11.87693343661802 | -5.36789917713061 |
| H  | 16.73828106697019 | 12.25109478464000 | -4.39792882991327 |
| H  | 17.15054645349723 | 12.10308262842568 | -6.11251244086332 |
| H  | 15.47257805414352 | 12.44676358850266 | -5.64114008445037 |
| C  | 13.10399295334138 | 5.17786236349360  | -5.87242321483992 |
| H  | 13.41261409116335 | 4.62016458456006  | -6.77313781954172 |
| H  | 13.05284850516843 | 4.45471288021046  | -5.04327988839071 |
| H  | 12.09350439085814 | 5.56696526225311  | -6.05119412164893 |
| C  | 15.86789219204088 | 7.81367127762356  | -2.95662757514726 |
| O  | 15.24465947632295 | 8.81067915601845  | -2.60613660563900 |
| O  | 16.27363695641001 | 6.83211081748269  | -2.30575048499261 |
| C  | 18.37230845377555 | 9.90666772161366  | -4.71353179683686 |
| H  | 18.39749603342947 | 10.30572921903884 | -3.68142408155625 |

H 18.68759740842516 10.72834330172224 -5.37564837685905

c)  $^2\text{H}$

C 14.78379664354337 9.81368730406841 -5.58388356155805  
C 13.58440657349270 10.44832855653723 -5.92449701086740  
C 12.44335096010981 9.66467006371355 -6.13351579935595  
C 13.72297626845090 7.67825876664903 -5.68048913801168  
C 12.50327806837383 8.26656396942336 -6.01432391488721  
H 13.53780886445030 11.53226819613037 -6.03432662071773  
H 11.50193215342299 10.14562654321278 -6.40522380451905  
H 11.61876805292828 7.65451956352397 -6.19336992011953  
C 14.07587866232352 6.25733265061612 -5.55276586704290  
C 16.10775695439017 10.38209316172847 -5.32432691288961  
N 14.80291327997728 8.46757681306778 -5.47265460324045  
N 15.32741324564615 6.07570807593957 -5.23206298253369  
N 17.02473653969212 9.48275067662875 -5.06724726320214  
C 16.00000354560708 4.78193942595948 -5.26607148884227  
C 19.38428438219115 8.73395463016824 -4.82151609861178  
C 17.29800392848393 4.94054860305610 -6.07275783187043  
C 18.44883946679762 5.66002892668366 -5.35247721521980  
C 19.10386284438484 7.55530041887581 -3.89628406588997  
N 17.99720026539010 6.68662813015630 -4.37400018943574  
H 15.36780970658880 4.01809659848487 -5.73598150554284  
H 16.20970696659511 4.45452639808358 -4.23418214158481  
H 17.65562672635033 3.94314107691992 -6.37024555128413  
H 17.04233409588691 5.47219257566253 -7.00327535100711  
H 19.09232736802853 6.15314171977891 -6.09291974805248  
H 19.07041797456008 4.93174125838251 -4.80583307236328  
H 17.66400426568594 6.18777596627827 -3.55196018841683  
H 20.01223201397065 6.94260745149636 -3.78091263470517  
H 18.82149882372226 7.91696182144488 -2.89692435928095  
H 20.37206871417727 9.14188328703322 -4.55652508766256  
H 19.45791898399932 8.38275039327469 -5.86405019499960

|    |                   |                   |                   |
|----|-------------------|-------------------|-------------------|
| Co | 16.34211066145204 | 7.67995226332421  | -4.86378894069062 |
| C  | 16.36843506928130 | 11.85339417142831 | -5.34349550218445 |
| H  | 16.71745867793157 | 12.19770547317900 | -4.35605786455842 |
| H  | 17.16141694968851 | 12.09939827607098 | -6.06713737151296 |
| H  | 15.47072112741877 | 12.42106887229066 | -5.61581925899119 |
| C  | 13.08824045801183 | 5.17047881363255  | -5.83498793793425 |
| H  | 13.16252552909794 | 4.84288700290199  | -6.88676015266865 |
| H  | 13.26040164721495 | 4.29388455052689  | -5.19736463084343 |
| H  | 12.06335232798108 | 5.52806121628282  | -5.66831611216687 |
| C  | 15.88455221817757 | 7.96875188761670  | -2.97395921667376 |
| O  | 15.31123420381865 | 8.91359508846409  | -2.48029515372133 |
| O  | 16.31794782846178 | 6.95299239379581  | -2.17169194599849 |
| C  | 18.38526932997796 | 9.88456541884051  | -4.72911769449103 |
| H  | 18.38221136948545 | 10.29420382525157 | -3.70235120885104 |
| H  | 18.71055858628672 | 10.69796266893616 | -5.39505076865197 |
| H  | 16.07802878149123 | 7.15215583947848  | -1.24443252834607 |

d) 2I

|   |                   |                  |                   |
|---|-------------------|------------------|-------------------|
| C | 16.15768977396836 | 8.55191236213550 | -6.24137843895117 |
| C | 15.37910295179596 | 8.93548310649339 | -7.33633960708828 |
| C | 14.34558479865224 | 8.08478259213219 | -7.74582923574572 |
| C | 14.93729943876409 | 6.53998314934891 | -6.00703751178063 |
| C | 14.12293049229435 | 6.86500956853340 | -7.09369167951479 |
| H | 15.57165096779477 | 9.86923423463329 | -7.86334587822650 |
| H | 13.71886981593564 | 8.36766077878998 | -8.59303806615231 |
| H | 13.34004521652072 | 6.18783306272041 | -7.43375963946475 |
| C | 14.96302939670193 | 5.29369374438770 | -5.19616704179299 |
| C | 17.34699819265315 | 9.22439386151606 | -5.65746848996407 |
| N | 15.88171941392374 | 7.40467830458530 | -5.61230361386226 |
| N | 15.86810787397325 | 5.30884374894555 | -4.27630150295481 |
| N | 17.89254590090817 | 8.57215454306293 | -4.68190530554515 |
| C | 16.15998198063807 | 4.20956533080420 | -3.37486363395858 |

|    |                   |                   |                   |
|----|-------------------|-------------------|-------------------|
| C  | 19.92705382907829 | 7.88560452995725  | -3.45649559984199 |
| C  | 17.64205057357684 | 3.80032975072931  | -3.45081555954883 |
| C  | 18.66469505208091 | 4.94961208554392  | -3.50413388704476 |
| C  | 19.25378405525194 | 7.09317201825135  | -2.34369150163760 |
| N  | 18.17708166735219 | 6.18075691471597  | -2.81340921421262 |
| H  | 15.53077501043674 | 3.33354164708971  | -3.57100884270209 |
| H  | 15.91768818692620 | 4.56855320516507  | -2.36123159777438 |
| H  | 17.83859439904299 | 3.17350181601019  | -2.56801555838518 |
| H  | 17.80223934129559 | 3.16633452649350  | -4.33524180302740 |
| H  | 18.89962434903394 | 5.22233179948852  | -4.54348399257627 |
| H  | 19.60550977325117 | 4.62100273779852  | -3.03655290431224 |
| H  | 17.68087635237446 | 5.88625655714718  | -1.97596257785827 |
| H  | 20.00451665806414 | 6.49017135438912  | -1.80872937371734 |
| H  | 18.79566864721105 | 7.77675478270204  | -1.61366691816537 |
| H  | 20.84775103679252 | 8.31925936717701  | -3.03749193743409 |
| H  | 20.24325602938433 | 7.21793319009116  | -4.27404178385387 |
| Co | 16.88899798085874 | 6.96784891016257  | -4.09807481879419 |
| C  | 17.83785770828784 | 10.53226312126543 | -6.18059453940025 |
| H  | 17.76034866018838 | 11.29686260593888 | -5.39052203369400 |
| H  | 18.89798607228161 | 10.46397180038935 | -6.47039927857401 |
| H  | 17.26179986266780 | 10.86900163065479 | -7.04903659423605 |
| C  | 14.05064119775573 | 4.14827114911023  | -5.48682093519299 |
| H  | 14.61382559558704 | 3.35017605557761  | -5.99918253336849 |
| H  | 13.63518717688594 | 3.72658706171865  | -4.56076108528671 |
| H  | 13.22147160334706 | 4.45075589603998  | -6.13642528974033 |
| C  | 15.75792984867945 | 7.91091477999495  | -2.80013329325317 |
| O  | 15.10321794724778 | 8.52706414422695  | -2.11940666888320 |
| C  | 19.10199690794598 | 9.04206281529866  | -4.01681468805247 |
| H  | 18.79847270161629 | 9.72037437816508  | -3.20051765048834 |
| H  | 19.71697494697138 | 9.62667021161773  | -4.71489640894113 |

e)  $^{17}\text{-K}^+$

|    |                   |                   |                   |
|----|-------------------|-------------------|-------------------|
| Re | -0.58909687858616 | 8.99299155143199  | 7.60957658255615  |
| C  | -1.99098467952718 | 11.38816961077302 | 11.02318413303491 |
| C  | -2.60250276981300 | 11.16382476186038 | 6.88503273833761  |
| C  | -3.35754051262054 | 12.04005908417505 | 6.03975487455051  |
| C  | -3.35071504746323 | 11.88015185903895 | 4.67960722573395  |
| C  | -2.58894671624784 | 10.80556035175336 | 4.11481497555831  |
| C  | -1.88205406044772 | 9.98275687718285  | 4.94758357266769  |
| N  | -1.84852670402018 | 10.12272567160425 | 6.31311791547261  |
| H  | -3.93562565325995 | 12.84315821321170 | 6.49951732369419  |
| H  | -3.92351498579454 | 12.55138563011576 | 4.03658150422347  |
| H  | -2.57213314366528 | 10.62533664671193 | 3.03895320749467  |
| H  | -1.28701720162516 | 9.15811738436495  | 4.55349660698619  |
| C  | -2.48047585849731 | 11.27807458974346 | 8.27939135193089  |
| C  | -3.13991074688795 | 12.25468859488693 | 9.09138420349099  |
| C  | -2.90619940649256 | 12.33009354391697 | 10.43713317296840 |
| C  | -1.39445257137079 | 10.44818379608180 | 10.23734907786170 |
| N  | -1.58942480552393 | 10.34367197412088 | 8.86967501652898  |
| H  | -3.84367921113265 | 12.93851976061294 | 8.61393418839371  |
| H  | -3.41849731907088 | 13.06701678734049 | 11.05798112629320 |
| H  | -1.77838808374110 | 11.39957308866487 | 12.09357167006408 |
| H  | -0.71210334550936 | 9.71367682473129  | 10.66426246579399 |
| C  | 0.27307805761913  | 8.02409904060664  | 9.05909089756116  |
| C  | 1.05631284416345  | 9.60667719966450  | 6.97543518365068  |
| O  | 0.77879758086369  | 7.48616529655645  | 9.94859234904032  |
| O  | 2.01718849847860  | 10.16715224253869 | 6.58914117167067  |
| C  | -0.45024496944696 | 7.40080703477530  | 6.49526166071806  |
| O  | -0.39123206126800 | 6.46002779713535  | 5.82830506664385  |
| K  | 0.09501294488757  | 12.33623128939846 | 7.31448877807845  |

f) <sup>1</sup>J

|    |                   |                   |                   |
|----|-------------------|-------------------|-------------------|
| Mn | -0.11694382018828 | 9.66839919664885  | 7.59168135684987  |
| C  | -2.19473571812539 | 11.28095789113674 | 11.07905556685099 |

|   |                   |                   |                   |
|---|-------------------|-------------------|-------------------|
| C | -2.22509783415723 | 11.57898154322267 | 6.88004695441306  |
| C | -3.08026343128695 | 12.37986040883773 | 6.10515073077455  |
| C | -3.05922432718150 | 12.27008009721702 | 4.72184950936217  |
| C | -2.17739727043761 | 11.34996943430886 | 4.13774167844074  |
| C | -1.35499568263576 | 10.59627119480604 | 4.96202782700328  |
| N | -1.36562311257217 | 10.70244911847339 | 6.30124574193817  |
| H | -3.76625216164658 | 13.07273522063631 | 6.59134656895613  |
| H | -3.72455434153785 | 12.87794381632751 | 4.10529533785775  |
| H | -2.13204600335081 | 11.20956508118964 | 3.05640997588796  |
| H | -0.65651769248502 | 9.87011559913341  | 4.54623752053477  |
| C | -2.22889867494391 | 11.56332155970759 | 8.34227239209953  |
| C | -3.06312656626513 | 12.37350383753952 | 9.13037164884058  |
| C | -3.04726996851604 | 12.23840213807725 | 10.51140163603613 |
| C | -1.39123150430009 | 10.52050288794545 | 10.24234881406784 |
| N | -1.39298752823843 | 10.65390736180825 | 8.90500086072406  |
| H | -3.72395664969987 | 13.09871795472489 | 8.65659287659703  |
| H | -3.69252879135791 | 12.85688820853359 | 11.13876810701714 |
| H | -2.15547591317899 | 11.11927372740220 | 12.15779770804646 |
| H | -0.71284076720919 | 9.77029519535305  | 10.64822408374314 |
| C | 1.01170903442066  | 9.11553548196249  | 8.88711094327023  |
| C | 1.09145690540423  | 9.20023772589445  | 6.33415170858504  |
| O | 1.72541423700704  | 8.78554245942954  | 9.72840072960144  |
| O | 1.86281038636777  | 8.91148670040281  | 5.52952091929332  |
| C | -1.02903001977615 | 8.10985729840078  | 7.48003714308931  |
| O | -1.58664061550521 | 7.10524123711590  | 7.38487151254391  |
| C | 1.08966810676142  | 11.69817973698194 | 7.66164346095219  |
| O | 0.38283270808583  | 12.73537197747462 | 7.65813508424674  |
| O | 2.33898923359082  | 11.65547808311839 | 7.68619761233168  |
| K | 2.46843492795836  | 14.16270856518879 | 7.69019826804467  |

g) <sup>1</sup>K

|    |                   |                   |                  |
|----|-------------------|-------------------|------------------|
| Re | -0.55745862163107 | 11.05836131883922 | 8.07544106346498 |
|----|-------------------|-------------------|------------------|

|   |                   |                   |                   |
|---|-------------------|-------------------|-------------------|
| C | -2.41998456623367 | 14.91283471649423 | 9.37241804516596  |
| C | -1.61127259198875 | 12.81922656273738 | 5.79756408530763  |
| C | -1.89927986624212 | 13.24681962498213 | 4.46730869520113  |
| C | -1.59129743885759 | 12.44724111848934 | 3.39177460772099  |
| C | -0.97509598844345 | 11.18874389773034 | 3.61825669004346  |
| C | -0.70921532908530 | 10.82087693720884 | 4.92659404100516  |
| N | -1.00361937912020 | 11.58302415301967 | 5.99189664273064  |
| H | -2.37779712484178 | 14.21373702648562 | 4.30874675690489  |
| H | -1.82706491367658 | 12.78065078433188 | 2.37766721605266  |
| H | -0.71353781868774 | 10.51834166698339 | 2.79931550623393  |
| H | -0.23436812929033 | 9.86449350142398  | 5.15195064685425  |
| C | -1.91383526314921 | 13.57489366615654 | 6.96998843699745  |
| C | -2.57754265215256 | 14.83797603903198 | 6.96599614940393  |
| C | -2.83233628133757 | 15.49675658749684 | 8.14547976200969  |
| C | -1.78654012583140 | 13.68333235620236 | 9.32664970438376  |
| N | -1.53973125582497 | 13.01322576914946 | 8.18904456496142  |
| H | -2.89384190631214 | 15.27543074444989 | 6.01858830155130  |
| H | -3.35087710048107 | 16.45858834620784 | 8.13536461612164  |
| H | -2.60526616938685 | 15.40060806536648 | 10.32977545154713 |
| H | -1.45158576751978 | 13.19102484244521 | 10.24111187993312 |
| C | -0.12927806936549 | 10.87716883190706 | 9.94780909713048  |
| C | 0.35579898853598  | 9.38932769852676  | 7.73710666642551  |
| O | 0.14784060669167  | 10.81566483797334 | 11.06896822150837 |
| O | 0.90344594588892  | 8.39666938090220  | 7.50847130595425  |
| C | -2.28222509949641 | 10.11794257109302 | 8.31351817824472  |
| O | -3.27866705131195 | 9.56613974849797  | 8.47621987174804  |
| C | 1.31146550346209  | 12.17925764355053 | 7.81377418207992  |
| O | 1.26392255548462  | 13.41635794107297 | 7.11439588725329  |
| O | 2.44463585949241  | 11.92226874229008 | 8.19801266933563  |
| H | 0.35394291066557  | 13.58985135139727 | 6.81850058325425  |
| K | 3.78704763704678  | 13.82868188755547 | 7.24848812847007  |

h)  ${}^2L$

|    |                   |                   |                   |
|----|-------------------|-------------------|-------------------|
| Re | -0.58304113981426 | 10.67768202854153 | 8.80066334965387  |
| C  | -2.12464590017066 | 14.51104229410539 | 10.46668527728893 |
| C  | -1.96390875992692 | 12.48042679805341 | 6.77299949482462  |
| C  | -2.51328367357444 | 12.90568214127994 | 5.53022981057590  |
| C  | -2.35856028693818 | 12.14560948827313 | 4.39509612013798  |
| C  | -1.63720366721717 | 10.92311654654211 | 4.47245842584705  |
| C  | -1.13058213546118 | 10.54356469669214 | 5.69816218839422  |
| N  | -1.27803595073867 | 11.27094358042758 | 6.82438680902398  |
| H  | -3.05897625893970 | 13.84819601226967 | 5.48405352843587  |
| H  | -2.78656388636956 | 12.48251850494028 | 3.44810155464619  |
| H  | -1.47939436906491 | 10.28874674403229 | 3.59996908997836  |
| H  | -0.57851076242789 | 9.60888762537142  | 5.80676549578696  |
| C  | -2.05762260715752 | 13.21320926918336 | 7.99008004519949  |
| C  | -2.73222264931779 | 14.45863918316244 | 8.13328038445113  |
| C  | -2.77504373131102 | 15.09953092880942 | 9.34843970636970  |
| C  | -1.47778656231724 | 13.30656380986020 | 10.28410370959050 |
| N  | -1.43815272178783 | 12.65415154199794 | 9.10435834038505  |
| H  | -3.22296537052987 | 14.90121786808863 | 7.26636558055789  |
| H  | -3.30199064376099 | 16.05059854837059 | 9.45145362336434  |
| H  | -2.12869495092406 | 14.98606058828586 | 11.44774314393508 |
| H  | -0.96045229320255 | 12.82050213502268 | 11.11250854723924 |
| C  | -0.05361392862148 | 10.36353865902004 | 10.65407524183307 |
| C  | 0.08734567734006  | 8.91379911188901  | 8.30498110778960  |
| O  | 0.25252387251591  | 10.20493955246550 | 11.75122852032079 |
| O  | 0.48157314515257  | 7.88028586853893  | 7.99078289294959  |
| C  | -2.41747141170722 | 9.90542089477265  | 9.16834234230138  |
| O  | -3.44280057290237 | 9.45918080917744  | 9.38325886151679  |
| C  | 1.23560923614039  | 11.45702376896927 | 8.40635897983616  |
| O  | 2.28066318103458  | 11.85665350085681 | 8.19056469676602  |

i)  $22^+$



|   |                    |                   |                   |
|---|--------------------|-------------------|-------------------|
| C | -8.76481474819572  | 16.33298327228164 | 11.10803041454820 |
| C | -9.38504787729820  | 15.43633897017013 | 7.01519328802895  |
| C | -10.35097668768986 | 15.91119264264387 | 6.12330514293621  |
| C | -10.38621051923286 | 15.41145053347064 | 4.82341060394066  |
| C | -9.44797265000199  | 14.44638942985877 | 4.44148550572934  |
| C | -8.50842834889684  | 14.02185557271130 | 5.37582991647084  |
| N | -8.46373484996564  | 14.49570977877911 | 6.62908443505906  |
| H | -11.07297191007072 | 16.65872935049261 | 6.45246121771321  |
| H | -11.13839944749477 | 15.76786337254046 | 4.11701767385600  |
| H | -9.43979724837486  | 14.02007363993797 | 3.43756889631230  |
| H | -7.76565130676681  | 13.26951584181486 | 5.11249962236924  |
| C | -9.27666700199458  | 15.85441098151986 | 8.41683107572718  |
| C | -10.04769961573443 | 16.79292180539875 | 9.09092263322916  |
| C | -9.77770384622599  | 17.03885862792054 | 10.45307812549512 |
| C | -8.01944773354112  | 15.38675642969552 | 10.39709610730881 |
| N | -8.28885538027825  | 15.18267622191560 | 9.06412837128850  |
| H | -10.84136004545143 | 17.33512612995849 | 8.57624852581865  |
| H | -10.36559153718061 | 17.77977699599547 | 10.99725925106485 |
| H | -8.54572276020502  | 16.52148086665903 | 12.16067706591054 |
| C | -4.39160793244825  | 11.23777036691644 | 6.25639467091738  |
| C | -5.43516642262164  | 12.87437937588191 | 10.00515648345800 |
| C | -4.89444513083198  | 12.67692129891371 | 11.26928622344927 |
| C | -5.39746162265627  | 13.43541890016904 | 12.34691358594236 |
| C | -6.41594719689307  | 14.36951291172935 | 12.13734759027477 |
| C | -6.94406099568880  | 14.52762792978341 | 10.85231613057226 |
| N | -6.44058409135518  | 13.77007073155524 | 9.82017728535653  |
| H | -4.09338451436930  | 11.95476168284270 | 11.42933212161784 |
| H | -4.98275123811821  | 13.29159212923286 | 13.34625644412607 |
| H | -6.80514999026387  | 14.96628756976561 | 12.96424607755656 |
| C | -5.04371391407008  | 12.22956434007029 | 8.74715509390376  |
| C | -4.00852421385175  | 11.29708438533649 | 8.62979416401996  |
| C | -3.67740716708073  | 10.79363336251192 | 7.37404895581020  |
| C | -5.42406159328823  | 12.15219890402591 | 6.44430067973103  |

|    |                   |                   |                  |
|----|-------------------|-------------------|------------------|
| N  | -5.75957135039959 | 12.63638486933199 | 7.64932796003603 |
| H  | -3.46207790464969 | 10.97800937497093 | 9.51760077602992 |
| H  | -2.86685556419051 | 10.07025579471873 | 7.26547061350011 |
| H  | -4.15621957923461 | 10.87978631779808 | 5.25308503897552 |
| H  | -6.00250365469497 | 12.51559959786269 | 5.59533357455762 |
| Fe | -7.21531891269331 | 13.96675975081761 | 8.13173347135768 |

j)  $^2[\text{Fe}(\text{qpy})(\text{CO}_2)]^+$

|   |                    |                   |                   |
|---|--------------------|-------------------|-------------------|
| C | -9.14685443583626  | 15.86675157751225 | 11.15324794530189 |
| C | -9.80087052919364  | 15.01284270441841 | 7.04759165385114  |
| C | -10.73947842187526 | 15.54876316094100 | 6.16918618011994  |
| C | -10.79948718855394 | 15.06167927819643 | 4.86047901540644  |
| C | -9.91353431948296  | 14.05731069110828 | 4.47212622585926  |
| C | -8.99750195846897  | 13.56968895727210 | 5.40594290980637  |
| N | -8.93503461834787  | 14.02950054312540 | 6.65771971918444  |
| H | -11.42274952760341 | 16.32941089487334 | 6.50366709794473  |
| H | -11.53255196996505 | 15.46264928751403 | 4.15820812321747  |
| H | -9.92720764527940  | 13.64154798010956 | 3.46372347258552  |
| H | -8.29723323973755  | 12.77608570825033 | 5.14451375730694  |
| C | -9.67085045597862  | 15.42348076168785 | 8.46338338052028  |
| C | -10.40229718742076 | 16.40610956376399 | 9.13957317535244  |
| C | -10.12495020566281 | 16.62300834611582 | 10.49239026787934 |
| C | -8.46029374283157  | 14.89569456710988 | 10.42594616987092 |
| N | -8.74346987130109  | 14.71695584422478 | 9.11972171711058  |
| H | -11.16347270430109 | 16.99248208287171 | 8.62554430286635  |
| H | -10.67746895031179 | 17.38787213788483 | 11.04113969983146 |
| H | -8.92191449389557  | 16.04173480578637 | 12.20580001084607 |
| C | -4.66613807167525  | 10.86670288323576 | 6.29637832197244  |
| C | -5.84397827477620  | 12.40622041777069 | 10.04953548253137 |
| C | -5.27876002658181  | 12.23827485447649 | 11.31879070812457 |
| C | -5.80341449295811  | 12.97439452720175 | 12.38399961081983 |
| C | -6.84944342001979  | 13.88421585858569 | 12.17211694237495 |

|    |                   |                   |                   |
|----|-------------------|-------------------|-------------------|
| C  | -7.37939899547303 | 13.99399982526749 | 10.88940996246710 |
| N  | -6.88673594805539 | 13.23264112556974 | 9.88493018711465  |
| H  | -4.44238591840804 | 11.55721552282489 | 11.47513041863147 |
| H  | -5.38062902468373 | 12.85344356181228 | 13.38304188444124 |
| H  | -7.24075609304891 | 14.48954205297443 | 12.99044533022770 |
| C  | -5.40223004246436 | 11.79079669889162 | 8.78070605841901  |
| C  | -4.34351657168757 | 10.88886117246857 | 8.67989877604658  |
| C  | -3.97079181045715 | 10.41738289737913 | 7.41913880275696  |
| C  | -5.72578280377827 | 11.75771431265745 | 6.47636632176954  |
| N  | -6.09310437523281 | 12.20404070335686 | 7.67944896536518  |
| H  | -3.81350267861972 | 10.56020304212466 | 9.57392283764782  |
| H  | -3.14329138445403 | 9.71276752757950  | 7.31668739845818  |
| H  | -4.39970136960295 | 10.53133660051697 | 5.29286077717709  |
| H  | -6.30068267996899 | 12.12323625451651 | 5.62454171557007  |
| Fe | -7.76351647885427 | 13.35131701493529 | 8.19100801446654  |
| C  | -9.10089165874536 | 11.94183422513858 | 8.90651632949568  |
| O  | -9.75855080305406 | 12.06507062462418 | 9.90931656766602  |
| O  | -8.87452107135185 | 11.15980258432391 | 7.99581183259363  |

k) <sup>1</sup>[Fe(qpy)(CO<sub>2</sub>)]

|   |                    |                   |                   |
|---|--------------------|-------------------|-------------------|
| C | -9.16983206928820  | 15.84894283604545 | 11.16990843889976 |
| C | -9.78876861030715  | 15.06073759986905 | 7.05962311229672  |
| C | -10.73228512948203 | 15.58268517170425 | 6.16475138907616  |
| C | -10.81025558860101 | 15.06670489057332 | 4.87541558886401  |
| C | -9.93353047850888  | 14.03548834301179 | 4.50313683450533  |
| C | -9.01480504749095  | 13.56824917793297 | 5.43461302768346  |
| N | -8.92499276248360  | 14.06127662125797 | 6.68083431745313  |
| H | -11.40924159134357 | 16.37319202578780 | 6.49068580540386  |
| H | -11.54752950714492 | 15.45371454143775 | 4.16925033297799  |
| H | -9.96588875928407  | 13.59228767211515 | 3.50659822187808  |
| H | -8.32737635493065  | 12.75790359284274 | 5.19003612931793  |
| C | -9.65516391801820  | 15.45918971777055 | 8.45825835250899  |

|    |                    |                   |                   |
|----|--------------------|-------------------|-------------------|
| C  | -10.37181128372302 | 16.43908823956374 | 9.14122019864818  |
| C  | -10.12265071320940 | 16.63856228044908 | 10.50965082476524 |
| C  | -8.47306704767828  | 14.87687447306860 | 10.45407223956155 |
| N  | -8.72299243923295  | 14.70646291012758 | 9.11144645655501  |
| H  | -11.11470182931301 | 17.04305681385861 | 8.61871878165974  |
| H  | -10.67245191783753 | 17.40479105547363 | 11.05873329617422 |
| H  | -8.96091646412174  | 16.00281862082516 | 12.23033417075863 |
| C  | -4.68233948893696  | 10.82927508276093 | 6.31606158978284  |
| C  | -5.82661666527933  | 12.43456559471983 | 10.05186708416427 |
| C  | -5.25027246691556  | 12.28319517846919 | 11.31054116341638 |
| C  | -5.78873159516948  | 13.00119099096764 | 12.39304138393192 |
| C  | -6.85780200244362  | 13.87829647049377 | 12.18853174117653 |
| C  | -7.40901362989140  | 13.99285221350481 | 10.90953318614168 |
| N  | -6.90432160606580  | 13.23857776730677 | 9.87982142458205  |
| H  | -4.39183310342211  | 11.62686117036475 | 11.45563960582595 |
| H  | -5.35374107164222  | 12.88805355848769 | 13.38783039330967 |
| H  | -7.25938484173610  | 14.47095844071211 | 13.01242343341762 |
| C  | -5.38281768060275  | 11.81482554892803 | 8.79439850453498  |
| C  | -4.32156470867531  | 10.90725072286982 | 8.69393180908347  |
| C  | -3.96642760462426  | 10.40852595370993 | 7.44286246468217  |
| C  | -5.73526175904918  | 11.72356469179962 | 6.49227522272782  |
| N  | -6.08384935099787  | 12.20591924928790 | 7.69060974920171  |
| H  | -3.78274860223336  | 10.59390227345476 | 9.58855523301875  |
| H  | -3.14038620584513  | 9.70114773496422  | 7.34498181345510  |
| H  | -4.43088153247879  | 10.46733042835389 | 5.31774251617541  |
| H  | -6.32529311969798  | 12.07089017325963 | 5.64281408953124  |
| Fe | -7.80567792538402  | 13.34714183744753 | 8.21844038021699  |
| C  | -9.06558518104011  | 11.91815181458437 | 8.74156832376731  |
| O  | -9.69603467967207  | 11.88946360857747 | 9.78592145215165  |
| O  | -8.96009912619639  | 11.18061609225845 | 7.75322798771536  |

1)  $^1[\text{Fe}(\text{qpy})(\text{CO}_2\text{H})]^+$

|   |                    |                   |                   |
|---|--------------------|-------------------|-------------------|
| C | -11.05502504125215 | 16.20362424904290 | 9.07253371145129  |
| C | -9.94739137610126  | 14.17171512925731 | 5.52451320807832  |
| C | -10.44724065483002 | 14.33907501325430 | 4.23405172089210  |
| C | -9.84433080905723  | 13.65630258102076 | 3.17508981655054  |
| C | -8.76802796482472  | 12.81183362745162 | 3.44491738201710  |
| C | -8.32075414972589  | 12.69751078130814 | 4.76211385732169  |
| N | -8.87839187194965  | 13.35993616610105 | 5.78157220998857  |
| H | -11.28931581406254 | 15.00770847760762 | 4.05391066504556  |
| H | -10.21550171809429 | 13.78898734979086 | 2.15660814506895  |
| H | -8.26547386726640  | 12.25318417997248 | 2.65442637384483  |
| H | -7.47247986960189  | 12.05622893628476 | 5.00242392054531  |
| C | -10.47317062104604 | 14.89753730131461 | 6.69984872388239  |
| C | -11.56887328977203 | 15.76699617639244 | 6.74193279286042  |
| C | -11.86574581271531 | 16.40641482288577 | 7.94897857272072  |
| C | -9.97206103397493  | 15.33153252074867 | 8.96291848278669  |
| N | -9.74030266834192  | 14.68180563923847 | 7.80041667045030  |
| H | -12.17475145655878 | 15.95118629037859 | 5.85466159374002  |
| H | -12.72034764850525 | 17.08252725295869 | 8.01063834042788  |
| H | -11.26032367917074 | 16.72576293714960 | 10.00750635344647 |
| C | -4.57868667399243  | 11.14030937512018 | 7.93320208663140  |
| C | -6.90461808805375  | 13.84813695092663 | 10.19526443341406 |
| C | -6.71537082183848  | 14.34985855081109 | 11.48738778103364 |
| C | -7.67403571652536  | 15.22455375255735 | 12.00712540552331 |
| C | -8.79442358116786  | 15.58475310659239 | 11.24718575482089 |
| C | -8.92538242845765  | 15.04733335147336 | 9.96756577890546  |
| N | -7.98549246087602  | 14.20268340028008 | 9.48968793928260  |
| H | -5.84477241001875  | 14.06508918239354 | 12.07805790410781 |
| H | -7.54541741970469  | 15.63443654610278 | 13.01038993517485 |
| H | -9.54254894709635  | 16.27269488027278 | 11.64249586772869 |
| C | -6.03174648708202  | 12.91328150810301 | 9.45400912498244  |
| C | -4.86865180433221  | 12.35807831564871 | 9.98388879648639  |
| C | -4.13229971673154  | 11.45185791629825 | 9.21674864006285  |
| C | -5.74226869739704  | 11.74969003171746 | 7.46319644728839  |

|    |                   |                   |                   |
|----|-------------------|-------------------|-------------------|
| N  | -6.46196861808794 | 12.60662023077885 | 8.19407087259363  |
| H  | -4.54177699720896 | 12.63057635775564 | 10.98774973435972 |
| H  | -3.22735472675366 | 10.99526430324680 | 9.62209466183714  |
| H  | -4.04010555060686 | 10.44068541392132 | 7.29292287817494  |
| H  | -6.11225761936992 | 11.53046118829126 | 6.46150049886630  |
| Fe | -8.25322063230628 | 13.49884794161776 | 7.75031788950537  |
| C  | -9.22096342186477 | 12.02699418505640 | 8.46501768940629  |
| O  | -9.95004215676895 | 12.01435472596690 | 9.43404970152452  |
| O  | -9.03282368285709 | 10.81437185814531 | 7.83990514747868  |
| H  | -8.46358090904929 | 10.93165468976153 | 7.06486344269031  |

m)  $^1[\text{Fe}(\text{qpy})(\text{CO})]^{2+}$

|   |                    |                   |                   |
|---|--------------------|-------------------|-------------------|
| C | -8.79695176631375  | 16.25718654836620 | 11.13126533402769 |
| C | -9.40765068297931  | 15.37350981144009 | 7.02544059103194  |
| C | -10.31944097559044 | 15.91603462963317 | 6.12565976836944  |
| C | -10.31750582843133 | 15.46647810333879 | 4.80148816791960  |
| C | -9.39822472076012  | 14.49153807458361 | 4.42014074839285  |
| C | -8.51521264204449  | 13.98805372153415 | 5.37631891419835  |
| N | -8.51219338233613  | 14.41316146882229 | 6.64162950098394  |
| H | -11.02675441500805 | 16.67736710650366 | 6.45389583884791  |
| H | -11.02924747226305 | 15.87525245181571 | 4.08233282583407  |
| H | -9.35835440588020  | 14.10551254635179 | 3.40086941504680  |
| H | -7.79698478327693  | 13.21325538422526 | 5.11450559759698  |
| C | -9.32095039712135  | 15.76999390092674 | 8.44715566049823  |
| C | -10.06446896045511 | 16.74998140108358 | 9.11268444410451  |
| C | -9.79376611872357  | 16.98309095885606 | 10.46366591523885 |
| C | -8.09728048645952  | 15.28811202968691 | 10.41665865357760 |
| N | -8.39430653423939  | 15.07638833213285 | 9.11717701535086  |
| H | -10.82910495184727 | 17.32399932326761 | 8.59024336899864  |
| H | -10.36021107325842 | 17.74308275552664 | 11.00440260613060 |
| H | -8.56564315150615  | 16.45541402010842 | 12.17816512959211 |
| C | -4.42884106999422  | 11.17880961664796 | 6.27947489289031  |

|    |                   |                   |                   |
|----|-------------------|-------------------|-------------------|
| C  | -5.43773647962807 | 12.84995699735744 | 10.02534297353626 |
| C  | -4.81797579926163 | 12.73656051636839 | 11.27348415280971 |
| C  | -5.32082470591485 | 13.49610522095350 | 12.33325138871795 |
| C  | -6.39880495360480 | 14.37216215087607 | 12.14129046266203 |
| C  | -6.97996788767299 | 14.43119784513897 | 10.87754405547302 |
| N  | -6.49514734775125 | 13.65584194553920 | 9.88448519876211  |
| H  | -3.96251549415996 | 12.07764464440912 | 11.41915502210008 |
| H  | -4.85770545358494 | 13.41577041165423 | 13.31825733367592 |
| H  | -6.77318815622628 | 14.98919715262749 | 12.95853654732814 |
| C  | -5.05074480840228 | 12.19571266170437 | 8.75778936914800  |
| C  | -3.94312893459122 | 11.36391465122431 | 8.62585250707598  |
| C  | -3.62493554255294 | 10.84607425814342 | 7.36655688676627  |
| C  | -5.53326225285156 | 12.00718993907933 | 6.48764776484690  |
| N  | -5.84374991969332 | 12.50476431983074 | 7.68740916527022  |
| H  | -3.32845770605163 | 11.12739791335242 | 9.49432794781190  |
| H  | -2.75649956744317 | 10.19688134726107 | 7.24120321862533  |
| H  | -4.21419825927301 | 10.80538985054676 | 5.27734638986279  |
| H  | -6.18333064475216 | 12.27986616317875 | 5.65846786367488  |
| Fe | -7.38662971440310 | 13.74142662542925 | 8.19657411300884  |
| C  | -8.54054224717812 | 12.45414027459661 | 8.55487346856206  |
| O  | -9.30696665151340 | 11.64991823887600 | 8.78812093564972  |

n)  $^{33}\text{O}$

|   |                   |                   |                   |
|---|-------------------|-------------------|-------------------|
| C | -2.31187353756197 | -0.99838600616794 | -3.53295220675675 |
| C | -4.13332608935709 | -1.46237891085961 | -4.93859106581516 |
| C | -1.43881640857606 | -1.30273273102407 | -4.58227770989195 |
| C | -3.31829812088540 | -1.76374511831574 | -6.01073066015176 |
| C | -1.92672436119481 | -1.67694079929810 | -5.83525528365322 |
| H | -5.22156635087997 | -1.50315269062665 | -5.03279899821313 |
| H | -0.36300782065135 | -1.23708435734324 | -4.43553848513916 |
| H | -3.76156938420978 | -2.05571281777807 | -6.96491318200681 |
| H | -1.23941652150728 | -1.89162026843727 | -6.65544659250018 |

|   |                   |                   |                   |
|---|-------------------|-------------------|-------------------|
| N | -3.66377558351255 | -1.07574204291555 | -3.72743166563480 |
| C | -1.80579659552237 | -0.54435947269235 | -2.13864189138583 |
| C | -0.27195978272192 | -0.59074264580019 | -2.09721612152339 |
| H | 0.09697388669357  | -0.26638082160027 | -1.11617275697749 |
| H | 0.10452410407755  | -1.60302578401711 | -2.28939268650185 |
| H | 0.15742648670095  | 0.08053142077213  | -2.84963053074056 |
| C | -2.26813771698980 | 0.92113529237516  | -1.89688368583923 |
| C | -1.41115095799520 | 1.99725286460886  | -1.72523657705483 |
| C | -1.96955063344851 | 3.29713074731033  | -1.58249748969731 |
| C | -4.17237121176762 | 2.34434363301323  | -1.78527607887699 |
| C | -3.33987741681933 | 3.47195162231576  | -1.61699933548637 |
| H | -0.33066563935110 | 1.87562190788112  | -1.70325125919273 |
| H | -1.30881625794666 | 4.15692981985507  | -1.45124135594550 |
| H | -3.77360796159999 | 4.46825792788949  | -1.51781858168958 |
| C | -2.38628640376825 | -1.50753041207764 | -1.07152462935890 |
| C | -1.56674189309324 | -2.26446474849938 | -0.22748788262685 |
| C | -2.11137470935792 | -3.15257476943183 | 0.70224278476604  |
| C | -4.27333385323120 | -2.50280554062493 | -0.08920163429243 |
| C | -3.50974401047975 | -3.27710489487456 | 0.76134657470530  |
| H | -0.48496754229634 | -2.16673170335219 | -0.28098393235739 |
| H | -1.46114446981031 | -3.72843670014629 | 1.36290344635366  |
| H | -5.36462631405111 | -2.55726082499019 | -0.06471114853582 |
| H | -3.99842234018123 | -3.95617763889003 | 1.46262005174808  |
| N | -3.59733606174616 | 1.10462348078536  | -1.91058911070783 |
| N | -3.74790009113420 | -1.62920025408370 | -0.98614824285970 |
| C | -5.60626672419920 | 2.33062005321083  | -1.87242881804011 |
| C | -6.42690706034616 | 3.47673056742158  | -1.78851033562022 |
| C | -7.51038490802956 | 0.96131278435674  | -2.18975797173208 |
| C | -7.79735166443475 | 3.33954914704952  | -1.90519410848793 |
| C | -8.36495826158539 | 2.06455464035209  | -2.10893454966751 |
| H | -5.97472748806812 | 4.45625738655693  | -1.63208686979247 |
| H | -8.44554689955906 | 4.21662248848026  | -1.83979451047600 |
| H | -9.44290483199776 | 1.93612945798590  | -2.19458690006271 |



|    |                    |                   |                   |
|----|--------------------|-------------------|-------------------|
| N  | -6.16264717860812  | 1.07715144833444  | -2.07672454320125 |
| N  | -7.97590438527640  | -0.31866167516294 | -2.38886692628338 |
| H  | -7.23560717439536  | -0.98307718729179 | -2.60435063696239 |
| C  | -9.28767042769353  | -0.61420822270684 | -2.92897946049734 |
| H  | -9.52665341643153  | 0.06921428865332  | -3.76841924308027 |
| H  | -10.06327665359687 | -0.43798489657652 | -2.16119943892604 |
| C  | -9.34840904960105  | -2.06122531458055 | -3.40376080138835 |
| H  | -10.33754453616460 | -2.29851124893981 | -3.82322929062934 |
| H  | -8.59788971080210  | -2.24903618904917 | -4.18964502089832 |
| H  | -9.14772454012335  | -2.75596613989138 | -2.57232614767737 |
| Fe | -4.80543034491060  | -0.44249613716217 | -2.20064235573651 |

o)  $^3[\text{Fe}(\text{bpy}^{\text{NHEt}}\text{PY2Me})(\text{CO}_2)]$

|   |                   |                   |                   |
|---|-------------------|-------------------|-------------------|
| C | -2.21041411728392 | -1.03023180821797 | -3.50218591379562 |
| C | -3.97080925486603 | -1.23722904903945 | -5.02867472038062 |
| C | -1.29156653415545 | -1.29557339734177 | -4.52541364798917 |
| C | -3.10617797564870 | -1.45364104434175 | -6.09296063620429 |
| C | -1.73721872813512 | -1.49634770635378 | -5.83141113092382 |
| H | -5.05329514585884 | -1.28251568029270 | -5.14618351368783 |
| H | -0.22538224783953 | -1.33799936677914 | -4.31947601617756 |
| H | -3.50914783778107 | -1.60978438304915 | -7.09512905252284 |
| H | -1.01817945448513 | -1.68961318940686 | -6.63068929708927 |
| N | -3.53204618644349 | -1.02437307877709 | -3.77657105037099 |
| C | -1.75444906989226 | -0.64318016148600 | -2.07099054857815 |
| C | -0.22020447778570 | -0.64157244246765 | -2.00353829476425 |
| H | 0.12554018338246  | -0.29328659501524 | -1.02269352090657 |
| H | 0.18549162489514  | -1.64713245624701 | -2.17395825088505 |
| H | 0.20529797966954  | 0.02818575761674  | -2.75835821489048 |
| C | -2.29515711346345 | 0.78851083468219  | -1.83680717176510 |
| C | -1.46199366985176 | 1.88936602803605  | -1.71389507951464 |
| C | -2.02898751821395 | 3.17951267715955  | -1.63703204839112 |
| C | -4.21027648921823 | 2.16677291225569  | -1.82816527893503 |

|   |                    |                   |                   |
|---|--------------------|-------------------|-------------------|
| C | -3.40668640163112  | 3.31115366552650  | -1.71315134671496 |
| H | -0.38026079045539  | 1.78180077706280  | -1.68920819551371 |
| H | -1.38851171732084  | 4.05808776679996  | -1.54199556215401 |
| H | -3.86127978653952  | 4.30080345186360  | -1.69096355797884 |
| C | -2.31082376631368  | -1.60213108101764 | -0.99058597532585 |
| C | -1.47122808488349  | -2.25478908466792 | -0.07578922215789 |
| C | -2.01717852018533  | -3.07406773655208 | 0.91207888596293  |
| C | -4.17457681956254  | -2.57535790904095 | 0.01913005231143  |
| C | -3.40011312940910  | -3.23927480807395 | 0.96452706913672  |
| H | -0.39250664674474  | -2.13177222154494 | -0.11746320780959 |
| H | -1.36109599162770  | -3.57842680027491 | 1.62539497824865  |
| H | -5.25881732926566  | -2.68222611919744 | -0.03723043290856 |
| H | -3.87799526933815  | -3.87232444350183 | 1.71397800831901  |
| N | -3.64319295885097  | 0.91941930669321  | -1.85465083116932 |
| N | -3.64192926538106  | -1.78016909149275 | -0.92151573246353 |
| C | -5.65640416097444  | 2.19279628549538  | -1.97186577582771 |
| C | -6.37283099718902  | 3.40015547708160  | -2.03551157804814 |
| C | -7.63517735275236  | 0.94141930339545  | -2.20524177402739 |
| C | -7.74901138307026  | 3.35977735424075  | -2.21593771739786 |
| C | -8.39354599766509  | 2.12983059854143  | -2.29885006508312 |
| H | -5.85414562024570  | 4.35301422418095  | -1.95509320324287 |
| H | -8.32646659181655  | 4.28554304720538  | -2.27521382387214 |
| H | -9.47594742709426  | 2.07021376846997  | -2.39680886909776 |
| N | -6.26970581162327  | 0.97081120169014  | -2.08819429213283 |
| N | -8.23873680683391  | -0.26547207628131 | -2.23280033636101 |
| H | -7.69537487821607  | -1.07308734354022 | -1.91300373884469 |
| C | -9.60033001691797  | -0.50610255517091 | -2.65578982952813 |
| H | -9.81920928315355  | 0.11821798408490  | -3.54130536773679 |
| H | -10.33273639458309 | -0.20507876973877 | -1.87878160413056 |
| C | -9.78268137057308  | -1.98053963288499 | -3.00779555104213 |
| H | -10.78827761596079 | -2.16029795267008 | -3.41845808460590 |
| H | -9.02972955412440  | -2.29548389755656 | -3.74619438764159 |
| H | -9.65034307310567  | -2.61716531919943 | -2.11865689478135 |

|    |                   |                   |                   |
|----|-------------------|-------------------|-------------------|
| Fe | -4.86944776751684 | -0.64915319984776 | -2.25698469629976 |
| C  | -6.05631487726101 | -2.15288156823311 | -2.78971076288263 |
| O  | -6.54406195839962 | -2.35156697744184 | -1.64283663934806 |
| O  | -6.29257886743822 | -2.59002653933729 | -3.90586257607763 |

p)  $^3[\text{Fe}(\text{bpy}^{\text{NH}_2}\text{PY2Me})(\text{CO}_2\text{H})]^+$

|   |                   |                   |                   |
|---|-------------------|-------------------|-------------------|
| C | -2.44855499126808 | -1.02905696617379 | -3.45530494978651 |
| C | -4.43204860921377 | -1.51186992082029 | -4.57207073693402 |
| C | -1.72612152781222 | -1.16540729717853 | -4.64499667908695 |
| C | -3.78703930081357 | -1.62937221635685 | -5.79879217720976 |
| C | -2.40421175733992 | -1.45084998635752 | -5.83146307865950 |
| H | -5.50571729868733 | -1.67645467969000 | -4.47950270273898 |
| H | -0.64749755171890 | -1.03034293398740 | -4.66384710249800 |
| H | -4.35960516716838 | -1.86242587208968 | -6.69751153990706 |
| H | -1.84973027121565 | -1.53546997313751 | -6.76864952346337 |
| N | -3.78098375476403 | -1.20122354168689 | -3.44441665871578 |
| C | -1.77895991473465 | -0.60675996337981 | -2.12291450089438 |
| C | -0.25189108880824 | -0.59151038352659 | -2.27444469032523 |
| H | 0.23129834424329  | -0.31927436011304 | -1.32803949810733 |
| H | 0.12516416548007  | -1.57335290693296 | -2.58409978848948 |
| H | 0.05495882851395  | 0.13906161526882  | -3.03164782417552 |
| C | -2.28844173852326 | 0.81531737058379  | -1.81245323742626 |
| C | -1.45335316231306 | 1.92312904993777  | -1.64722973802595 |
| C | -2.02754980789668 | 3.18243005950027  | -1.45606236829350 |
| C | -4.19352560794931 | 2.17144759263769  | -1.62905597596671 |
| C | -3.41373859576096 | 3.31839413665444  | -1.46060503049490 |
| H | -0.37132020222656 | 1.82192587687979  | -1.67728758290657 |
| H | -1.39008554984018 | 4.05872331413609  | -1.32446039308099 |
| H | -3.87658890172621 | 4.29840113158041  | -1.35258681341205 |
| C | -2.19171225507144 | -1.55367630028433 | -0.97455666547754 |
| C | -1.26592943776426 | -2.40923574192333 | -0.36694461989025 |
| C | -1.65059121863114 | -3.19317505057599 | 0.72056592559432  |
| C | -3.83422242575499 | -2.25038158103764 | 0.52603743777276  |

|    |                    |                   |                   |
|----|--------------------|-------------------|-------------------|
| C  | -2.95640694811419  | -3.09321822440976 | 1.19669287244687  |
| H  | -0.24411948776498  | -2.47231788065207 | -0.73113470884090 |
| H  | -0.92762453332561  | -3.86167346000721 | 1.19247059812927  |
| H  | -4.87559771159310  | -2.15851501116161 | 0.82948484242984  |
| H  | -3.30293350972015  | -3.66524885389671 | 2.05860453725701  |
| N  | -3.61769122953893  | 0.95993190321514  | -1.76248867010311 |
| N  | -3.46902318333093  | -1.52111260456275 | -0.54147084709436 |
| C  | -5.65738817893298  | 2.16147506925030  | -1.79528359088765 |
| C  | -6.42812067845984  | 3.31216779718269  | -1.71426557407153 |
| C  | -7.47137755800577  | 0.87753593328452  | -2.55141065688163 |
| C  | -7.79052653376009  | 3.22064980329740  | -2.03731875927884 |
| C  | -8.31367273939438  | 2.02027111884026  | -2.47458606778430 |
| H  | -5.98417576711930  | 4.26088674473172  | -1.41789891209155 |
| H  | -8.42979031234383  | 4.10336181746336  | -1.97049430156923 |
| H  | -9.35655597927317  | 1.94254918126372  | -2.77535487827552 |
| N  | -6.18108064842002  | 0.94302531850415  | -2.12905720164159 |
| N  | -7.92233776234184  | -0.27890148003135 | -3.07346669809836 |
| H  | -7.30073148255411  | -1.07169658320908 | -3.07320540384384 |
| C  | -9.28869505823599  | -0.51468437293360 | -3.52203407017514 |
| H  | -9.54838755782914  | 0.21600853651434  | -4.30647510187887 |
| H  | -9.99362832888453  | -0.35540350926994 | -2.68754910680541 |
| C  | -9.41986192986926  | -1.93218912860832 | -4.06123964581671 |
| H  | -10.43126630284555 | -2.09349379489073 | -4.46169840214656 |
| H  | -8.69965536424255  | -2.11385950289204 | -4.87475180244763 |
| H  | -9.23885655679550  | -2.67634844524826 | -3.27055447305174 |
| Fe | -4.86448656775940  | -0.57630173379068 | -1.74100126467183 |
| C  | -6.17130975608960  | -1.98555542561050 | -1.38862415582203 |
| O  | -6.77348035324357  | -2.12134811548129 | -0.33226446352081 |
| O  | -6.43933019740803  | -2.89550461338279 | -2.38414177922487 |
| H  | -7.10464387003776  | -3.53194441243582 | -2.05164998363922 |

q)  $^3[\text{Fe}(\text{bpy}^{\text{NHEt}}\text{PY2Me})(\text{CO})]^{2+}$

|   |                   |                   |                   |
|---|-------------------|-------------------|-------------------|
| C | -2.31540840500000 | -1.02788782200000 | -3.45260564300000 |
| C | -4.19284040900000 | -1.35747612700000 | -4.79915370800000 |
| C | -1.48569055100000 | -1.17026474900000 | -4.57164158400000 |
| C | -3.42900094700000 | -1.46034454700000 | -5.95601630400000 |
| C | -2.04401364800000 | -1.37460188200000 | -5.83440723600000 |
| H | -5.27578640300000 | -1.46869001000000 | -4.81876167000000 |
| H | -0.40551898700000 | -1.10376162100000 | -4.47464461400000 |
| H | -3.91742936400000 | -1.61954276800000 | -6.91871915400000 |
| H | -1.39696594800000 | -1.46383657000000 | -6.70995163000000 |
| N | -3.64963518700000 | -1.13996343200000 | -3.59419603500000 |
| C | -1.75528187700000 | -0.64013061500000 | -2.06064354100000 |
| C | -0.22122375800000 | -0.61452126200000 | -2.10964713400000 |
| H | 0.19164343100000  | -0.29410508700000 | -1.14610823100000 |
| H | 0.18923221500000  | -1.60388523700000 | -2.35096760300000 |
| H | 0.12931327200000  | 0.09792160700000  | -2.86361790500000 |
| C | -2.29422620000000 | 0.79398311000000  | -1.77457687200000 |
| C | -1.45502462200000 | 1.88369022700000  | -1.60649374000000 |
| C | -2.04977838200000 | 3.17401726600000  | -1.48145953300000 |
| C | -4.23498005100000 | 2.16298632700000  | -1.74575808500000 |
| C | -3.41559200400000 | 3.30861117400000  | -1.56647227200000 |
| H | -0.37337034700000 | 1.78614026700000  | -1.58538801600000 |
| H | -1.41603467300000 | 4.05255623400000  | -1.34262349400000 |
| H | -3.86920247300000 | 4.29749338900000  | -1.50357857600000 |
| C | -2.21684676900000 | -1.62280733200000 | -0.95718697000000 |
| C | -1.29506538400000 | -2.28991224800000 | -0.13649307500000 |
| C | -1.74125883000000 | -3.13982660800000 | 0.87504152100000  |
| C | -3.97094605800000 | -2.63494299300000 | 0.19815758300000  |
| C | -3.11182277300000 | -3.31590961900000 | 1.05250731100000  |
| H | -0.22624625200000 | -2.15346315000000 | -0.27323547000000 |
| H | -1.01959357800000 | -3.65442400400000 | 1.51324755800000  |
| H | -5.05430525500000 | -2.74273034400000 | 0.26538540100000  |
| H | -3.51745130400000 | -3.96738258900000 | 1.82846878500000  |
| N | -3.62752769200000 | 0.92130280100000  | -1.79633653200000 |

|    |                    |                   |                   |
|----|--------------------|-------------------|-------------------|
| N  | -3.53534744300000  | -1.81874440100000 | -0.77379288700000 |
| C  | -5.65550702400000  | 2.19593046600000  | -1.94890549800000 |
| C  | -6.37035214100000  | 3.41250656600000  | -2.06995325500000 |
| C  | -7.63885334000000  | 0.97088901800000  | -2.36708264800000 |
| C  | -7.72277441800000  | 3.38465438900000  | -2.35150541200000 |
| C  | -8.38265349000000  | 2.15691684900000  | -2.50732438500000 |
| H  | -5.85049789300000  | 4.36323457900000  | -1.96531879700000 |
| H  | -8.28162163900000  | 4.31871066800000  | -2.45275508500000 |
| H  | -9.45102858200000  | 2.11469597900000  | -2.70799819300000 |
| N  | -6.30732720100000  | 0.98004823800000  | -2.09080672900000 |
| N  | -8.22406213400000  | -0.25373190400000 | -2.52305122000000 |
| H  | -7.78941898300000  | -1.01591302000000 | -2.00774218300000 |
| C  | -9.58467445000000  | -0.45548220100000 | -2.96494205900000 |
| H  | -9.76764511500000  | 0.17511533500000  | -3.85271347600000 |
| H  | -10.32660163100000 | -0.13508035100000 | -2.20358017100000 |
| C  | -9.80132919400000  | -1.92356859900000 | -3.32032090400000 |
| H  | -10.80451948800000 | -2.08159652400000 | -3.74566343400000 |
| H  | -9.05066301500000  | -2.25826736000000 | -4.05268256700000 |
| H  | -9.70069971600000  | -2.56464038900000 | -2.42942867700000 |
| Fe | -4.93338023100000  | -0.67249924200000 | -1.96482695600000 |
| C  | -5.96072509900000  | -2.33903317500000 | -2.38797331000000 |
| O  | -6.66182196000000  | -3.26728800200000 | -2.70247122400000 |

r) <sup>25</sup>O

|   |            |           |           |
|---|------------|-----------|-----------|
| C | -8.928494  | 16.150535 | 11.176160 |
| C | -9.354396  | 15.358949 | 7.055383  |
| C | -10.249208 | 15.840115 | 6.093878  |
| C | -10.073069 | 15.530415 | 4.752390  |
| C | -8.958723  | 14.747481 | 4.392545  |
| C | -8.111040  | 14.281601 | 5.381440  |
| N | -8.285629  | 14.522617 | 6.707676  |
| H | -11.077723 | 16.472001 | 6.414886  |

|    |            |           |           |
|----|------------|-----------|-----------|
| H  | -10.765917 | 15.901532 | 3.997915  |
| H  | -8.748298  | 14.505436 | 3.351360  |
| H  | -7.230869  | 13.697652 | 5.120010  |
| C  | -9.374169  | 15.691738 | 8.459888  |
| C  | -10.242785 | 16.525018 | 9.167205  |
| C  | -10.020011 | 16.753877 | 10.529956 |
| C  | -8.086497  | 15.315649 | 10.449956 |
| N  | -8.324083  | 15.091175 | 9.108642  |
| H  | -11.081962 | 16.999072 | 8.658313  |
| H  | -10.690716 | 17.405770 | 11.088576 |
| H  | -8.739493  | 16.326982 | 12.234823 |
| C  | -4.901936  | 10.937674 | 6.341991  |
| C  | -5.314414  | 13.040243 | 9.949863  |
| C  | -4.653700  | 12.976353 | 11.178070 |
| C  | -5.139896  | 13.718273 | 12.260774 |
| C  | -6.285161  | 14.517282 | 12.109271 |
| C  | -6.916041  | 14.571690 | 10.871378 |
| N  | -6.419915  | 13.841788 | 9.809730  |
| H  | -3.771504  | 12.346663 | 11.292638 |
| H  | -4.632709  | 13.671117 | 13.223789 |
| H  | -6.678370  | 15.093651 | 12.946413 |
| C  | -5.050345  | 12.328218 | 8.722246  |
| C  | -4.030567  | 11.390109 | 8.530559  |
| C  | -3.932932  | 10.692563 | 7.334556  |
| C  | -5.881707  | 11.886679 | 6.572241  |
| N  | -5.972965  | 12.623961 | 7.710419  |
| H  | -3.323505  | 11.207884 | 9.340261  |
| H  | -3.141343  | 9.960519  | 7.178028  |
| H  | -4.898385  | 10.391868 | 5.399117  |
| H  | -6.653911  | 12.070480 | 5.827940  |
| Co | -7.361481  | 13.903101 | 8.087118  |

s)  $^2[\text{Co}(\text{qpy})(\text{CO}_2)]$

|   |                    |                   |                   |
|---|--------------------|-------------------|-------------------|
| C | -8.72900401932919  | 16.25660481682916 | 11.07590858142024 |
| C | -9.46558744835759  | 15.51415560537824 | 6.97658424147580  |
| C | -10.40652844347246 | 16.12615452959250 | 6.13278036647608  |
| C | -10.53334539337892 | 15.69515236974473 | 4.81811531457657  |
| C | -9.71075524374746  | 14.65038440212353 | 4.36592447975407  |
| C | -8.79277440049496  | 14.10134925351642 | 5.25333371985531  |
| N | -8.65678947842548  | 14.51683110721673 | 6.51779564253605  |
| H | -11.03934173132979 | 16.92761546597912 | 6.51512688666132  |
| H | -11.26503460156437 | 16.15753244523876 | 4.15215910646519  |
| H | -9.78922688144792  | 14.26202086194840 | 3.34892621927365  |
| H | -8.14250530817474  | 13.27739722283632 | 4.95180682594590  |
| C | -9.29146370481471  | 15.85964733445626 | 8.39380772910620  |
| C | -10.01380555814757 | 16.82402306180557 | 9.09848663787466  |
| C | -9.72652281341276  | 17.02282887380323 | 10.45737571137878 |
| C | -8.03993050125311  | 15.30601952662775 | 10.32097125015872 |
| N | -8.33920739804183  | 15.12947882320485 | 9.01031420291549  |
| H | -10.78487109959883 | 17.41742422815535 | 8.60589682150712  |
| H | -10.27725361043784 | 17.77168358997229 | 11.02955947820031 |
| H | -8.48336056096901  | 16.41530675961894 | 12.12745764720492 |
| C | -4.19100343797139  | 10.99257112293650 | 6.40091052143452  |
| C | -5.36938580299418  | 12.86264369429725 | 10.00886831903906 |
| C | -4.85545897268660  | 12.69390620592213 | 11.29503477809322 |
| C | -5.42556773714039  | 13.42563110644922 | 12.34858647655216 |
| C | -6.47293104557723  | 14.31926284494896 | 12.08967521092294 |
| C | -6.94879776119822  | 14.44089590940210 | 10.78279662856923 |
| N | -6.39862009615928  | 13.70393727242736 | 9.78764402120342  |
| H | -4.03536625560258  | 12.00126387513072 | 11.48802039666907 |
| H | -5.04961401618027  | 13.29586422397417 | 13.36554825652224 |
| H | -6.92021390400680  | 14.89834007341133 | 12.89918661531035 |
| C | -4.90363879735201  | 12.17891934702810 | 8.79268299042590  |
| C | -3.78788952976506  | 11.32761347595129 | 8.74818520803158  |
| C | -3.42275185169617  | 10.73248829914306 | 7.54653550821456  |



|    |                   |                   |                  |
|----|-------------------|-------------------|------------------|
| C  | -5.28705886491210 | 11.83947748510661 | 6.52162489458230 |
| N  | -5.63593428460352 | 12.42881281983959 | 7.67077129893270 |
| H  | -3.21192489225616 | 11.13607595181049 | 9.65440155768294 |
| H  | -2.55421961773731 | 10.07201765652757 | 7.49732415940389 |
| H  | -3.94372677290796 | 10.54153286964376 | 5.43829932202613 |
| H  | -5.92683883310547 | 12.06000413028478 | 5.66405008296432 |
| Co | -7.38310005821181 | 13.62199462109340 | 7.99062384790499 |
| C  | -8.59811063831455 | 12.10984707007696 | 8.63004729156722 |
| O  | -9.02816849069260 | 11.93123859143754 | 9.72586952130957 |
| O  | -8.51615486052983 | 11.72245897010897 | 7.47761340285129 |

t)  ${}^2[\text{Co}(\text{qpy})(\text{CO}_2\text{H})]^+$

|   |            |           |           |
|---|------------|-----------|-----------|
| C | -8.928494  | 16.150535 | 11.176160 |
| C | -9.354396  | 15.358949 | 7.055383  |
| C | -10.249208 | 15.840115 | 6.093878  |
| C | -10.073069 | 15.530415 | 4.752390  |
| C | -8.958723  | 14.747481 | 4.392545  |
| C | -8.111040  | 14.281601 | 5.381440  |
| N | -8.285629  | 14.522617 | 6.707676  |
| H | -11.077723 | 16.472001 | 6.414886  |
| H | -10.765917 | 15.901532 | 3.997915  |
| H | -8.748298  | 14.505436 | 3.351360  |
| H | -7.230869  | 13.697652 | 5.120010  |
| C | -9.374169  | 15.691738 | 8.459888  |
| C | -10.242785 | 16.525018 | 9.167205  |
| C | -10.020011 | 16.753877 | 10.529956 |
| C | -8.086497  | 15.315649 | 10.449956 |
| N | -8.324083  | 15.091175 | 9.108642  |
| H | -11.081962 | 16.999072 | 8.658313  |
| H | -10.690716 | 17.405770 | 11.088576 |
| H | -8.739493  | 16.326982 | 12.234823 |
| C | -4.901936  | 10.937674 | 6.341991  |

|    |           |           |           |
|----|-----------|-----------|-----------|
| C  | -5.314414 | 13.040243 | 9.949863  |
| C  | -4.653700 | 12.976353 | 11.178070 |
| C  | -5.139896 | 13.718273 | 12.260774 |
| C  | -6.285161 | 14.517282 | 12.109271 |
| C  | -6.916041 | 14.571690 | 10.871378 |
| N  | -6.419915 | 13.841788 | 9.809730  |
| H  | -3.771504 | 12.346663 | 11.292638 |
| H  | -4.632709 | 13.671117 | 13.223789 |
| H  | -6.678370 | 15.093651 | 12.946413 |
| C  | -5.050345 | 12.328218 | 8.722246  |
| C  | -4.030567 | 11.390109 | 8.530559  |
| C  | -3.932932 | 10.692563 | 7.334556  |
| C  | -5.881707 | 11.886679 | 6.572241  |
| N  | -5.972965 | 12.623961 | 7.710419  |
| H  | -3.323505 | 11.207884 | 9.340261  |
| H  | -3.141343 | 9.960519  | 7.178028  |
| H  | -4.898385 | 10.391868 | 5.399117  |
| H  | -6.653911 | 12.070480 | 5.827940  |
| Co | -7.361481 | 13.903101 | 8.087118  |
| C  | -8.512203 | 12.203230 | 8.655605  |
| O  | -8.561470 | 11.627118 | 9.974418  |
| O  | -8.976245 | 11.450330 | 7.519204  |
| H  | -8.383692 | 11.597045 | 6.778289  |

u)  $^2[\text{Co}(\text{qpy})(\text{CO})]^{2+}$

|   |                    |                   |                   |
|---|--------------------|-------------------|-------------------|
| C | -8.75545101787745  | 16.31563886572415 | 11.11392821457803 |
| C | -9.37770206346013  | 15.38091041896234 | 7.02034721725670  |
| C | -10.30441372442691 | 15.89453543041005 | 6.11581487786434  |
| C | -10.33511214960757 | 15.39569660493187 | 4.80995396923895  |
| C | -9.43306555250353  | 14.39508445242060 | 4.45136918079555  |
| C | -8.53463570511923  | 13.92469569677936 | 5.41028825199331  |
| N | -8.49384052523048  | 14.40053208081335 | 6.65779563804704  |

|    |                    |                   |                   |
|----|--------------------|-------------------|-------------------|
| H  | -11.00387527661094 | 16.67155474783000 | 6.42551172936952  |
| H  | -11.05759848544226 | 15.78227105260632 | 4.08812727717717  |
| H  | -9.42199836242857  | 13.96832502093903 | 3.44702169694889  |
| H  | -7.83518222297490  | 13.12666928513293 | 5.16497437946335  |
| C  | -9.27491017165064  | 15.80786451140954 | 8.43048567047462  |
| C  | -10.00626664036063 | 16.80604030353421 | 9.08618922388637  |
| C  | -9.73715692502477  | 17.05278484495158 | 10.43542562846274 |
| C  | -8.06536188991238  | 15.32948246763794 | 10.41105107394846 |
| N  | -8.35702049246365  | 15.10985919422486 | 9.11051591002293  |
| H  | -10.76263270884393 | 17.38681285979593 | 8.55791100138569  |
| H  | -10.29287429704902 | 17.82953205771458 | 10.96516882627758 |
| H  | -8.52777448509134  | 16.52241375979991 | 12.16075387926188 |
| C  | -4.37789232937742  | 11.30752482658390 | 6.23695768576473  |
| C  | -5.44915922422155  | 12.85110191372710 | 10.01865897140873 |
| C  | -4.86724858112696  | 12.68622683020192 | 11.28139160158058 |
| C  | -5.37598355503939  | 13.42821549874229 | 12.35131922591432 |
| C  | -6.42693075916727  | 14.33678215770139 | 12.15673569585511 |
| C  | -6.97233868710794  | 14.45006113331895 | 10.87934241572775 |
| N  | -6.48140558277556  | 13.69075440390927 | 9.87552376810595  |
| H  | -4.03400800241540  | 11.99986290074102 | 11.43369587919368 |
| H  | -4.94029094285432  | 13.30682356650362 | 13.34562959626674 |
| H  | -6.80940313472751  | 14.93420577611978 | 12.98556595401747 |
| C  | -5.05111486847537  | 12.22544858936618 | 8.74193487320592  |
| C  | -3.97053495828938  | 11.35745673747977 | 8.60387086954811  |
| C  | -3.62827903977319  | 10.88508513095119 | 7.33299728058178  |
| C  | -5.46080976747150  | 12.16262494703691 | 6.45284705017740  |
| N  | -5.80677269638232  | 12.60436183495305 | 7.66538333207356  |
| H  | -3.39021242916807  | 11.05716956069365 | 9.47693596530332  |
| H  | -2.78138306604149  | 10.20779300237408 | 7.20329407208028  |
| H  | -4.13392935553275  | 10.98127019229992 | 5.22427373419067  |
| H  | -6.06409790666891  | 12.50690190236312 | 5.61401289277186  |
| Co | -7.38261434038315  | 13.75638842672460 | 8.21337450786285  |
| C  | -8.67684471733807  | 12.24006803231013 | 8.64328071462097  |

O -9.43127970458415 11.46650429327957 8.95103142129511

v) <sup>26</sup>O

|   |                  |                   |                    |
|---|------------------|-------------------|--------------------|
| C | 2.15365353187102 | 0.13266554217152  | -10.89618516702987 |
| C | 3.64325205643890 | -0.44425553126592 | -9.05132438312780  |
| C | 1.04834779083810 | 0.04854544094256  | -10.04372411318399 |
| C | 2.53619883450402 | -0.55130105082629 | -8.19569807758481  |
| C | 1.24856026474416 | -0.27892406653370 | -8.68683646947429  |
| H | 0.04119965986739 | 0.21589378420781  | -10.43152348618357 |
| H | 2.67529194204418 | -0.86206894000072 | -7.15783757131477  |
| H | 0.38781775039264 | -0.35914648259880 | -8.01842492111722  |
| N | 3.42643078939473 | -0.03515750830975 | -10.36330130191805 |
| C | 2.20766232903847 | 0.31297651932171  | -12.31091188191358 |
| N | 3.47282673568731 | 0.24458018126055  | -12.77016187034496 |
| C | 1.01968479352759 | 0.49322812901111  | -13.20555189353072 |
| H | 1.07076441453338 | 1.43819490851020  | -13.77697715687454 |
| H | 0.93718452168861 | -0.31742345180053 | -13.95149654558385 |
| H | 0.08680850272610 | 0.50476398453293  | -12.62482184299177 |
| C | 3.80624626819149 | 0.17591524347948  | -14.17879843776787 |
| H | 3.55570783681832 | -0.82365295795094 | -14.58475228993906 |
| H | 3.25732482218292 | 0.91236005565713  | -14.79108062255326 |
| C | 5.30345358658336 | 0.43468987209607  | -14.29672858909414 |
| H | 5.69058228634230 | 0.13181266305725  | -15.28482731413508 |
| H | 5.48801600302215 | 1.51020561548943  | -14.17648211969509 |
| N | 6.03368947639939 | -0.26462179637052 | -13.20754428427235 |
| C | 7.43565811519266 | 0.17794807014120  | -13.10692141009890 |
| H | 7.97434600231103 | -0.56378703273450 | -12.50490276035994 |
| H | 7.91881983566874 | 0.20341859071183  | -14.10025377138846 |
| C | 7.52486828283607 | 1.56311042769323  | -12.46281807694824 |
| H | 8.59186203422913 | 1.79686434617604  | -12.28255748442053 |
| H | 7.15056085746616 | 2.32186791520610  | -13.16459828814422 |
| N | 6.72839738201008 | 1.65678400435105  | -11.23848632407480 |

|    |                  |                   |                    |
|----|------------------|-------------------|--------------------|
| C  | 7.39162574667906 | 1.20410150162868  | -10.00916757198224 |
| H  | 8.46803845662913 | 1.46632039286163  | -10.00950983953208 |
| H  | 6.91651334819794 | 1.72796448019146  | -9.16629758173497  |
| C  | 7.20217952704060 | -0.30614225097479 | -9.79325216305629  |
| H  | 7.76412403952588 | -0.86627750059954 | -10.55497636887266 |
| H  | 7.63061459142783 | -0.58836958146212 | -8.81869303551166  |
| N  | 5.78991814540744 | -0.58940506586426 | -9.91175159842610  |
| C  | 5.02041039215421 | -0.68085299045493 | -8.79886044036598  |
| C  | 5.57526238450961 | -0.96640099575183 | -7.43047432405140  |
| H  | 6.12820618142529 | -0.10745421468069 | -7.00697790715870  |
| H  | 4.77021890484148 | -1.21497239014327 | -6.72522243478166  |
| H  | 6.27672715637105 | -1.81850301496597 | -7.44275439217567  |
| Co | 4.84646038897216 | -0.00826884961023 | -11.51381168885213 |
| H  | 6.40272841732268 | 2.60537000881805  | -11.11917884544228 |
| H  | 6.03012841994524 | -1.25965727161774 | -13.41158377699045 |

w)  $^2[\text{Co}(\text{L})(\text{CO}_2)]$

|   |                  |                   |                    |
|---|------------------|-------------------|--------------------|
| C | 2.11518013313697 | 0.05628818806633  | -10.91617638437305 |
| C | 3.59737232953440 | -0.42397144698942 | -9.08918840308243  |
| C | 1.01137205000969 | -0.01505518078432 | -10.06187411729975 |
| C | 2.52044671682845 | -0.50564183327898 | -8.20965182561066  |
| C | 1.22044783724479 | -0.28020650537841 | -8.70103597288439  |
| H | 0.00137535819945 | 0.12000560051238  | -10.45252602440065 |
| H | 2.67849622347070 | -0.75415724854362 | -7.15914555969356  |
| H | 0.36735273093505 | -0.33966815731998 | -8.02286920120688  |
| N | 3.37043848118886 | -0.08782317646668 | -10.38883965181084 |
| C | 2.16883740840346 | 0.22092273641239  | -12.35414297755627 |
| N | 3.40393534884575 | 0.14324673328004  | -12.81352318525884 |
| C | 0.97262721731935 | 0.42263156631875  | -13.22954586568542 |
| H | 1.04689242618209 | 1.36910785351526  | -13.79183136965969 |
| H | 0.88657219232424 | -0.38663667909303 | -13.97357652489605 |
| H | 0.04577682294253 | 0.44731393533223  | -12.64223247487689 |

|    |                  |                   |                    |
|----|------------------|-------------------|--------------------|
| C  | 3.78990648509512 | 0.17102902973352  | -14.21071604132969 |
| H  | 3.66105148214114 | -0.83845470932142 | -14.63860290418391 |
| H  | 3.18230778917248 | 0.86921362762540  | -14.80648805404367 |
| C  | 5.26063016678276 | 0.57694884635437  | -14.25345509252256 |
| H  | 5.69249193985650 | 0.38012647464309  | -15.24994835758549 |
| H  | 5.34253558129843 | 1.65392103010262  | -14.05023608868028 |
| N  | 6.01553203485912 | -0.15115890497377 | -13.20640813380107 |
| C  | 7.41699202222649 | 0.27762895169905  | -13.10600528306768 |
| H  | 7.95734903880109 | -0.49138015092696 | -12.53935629960791 |
| H  | 7.88187698813771 | 0.31278078001703  | -14.10817545107659 |
| C  | 7.58282340724860 | 1.64652312656786  | -12.44586004142824 |
| H  | 8.67181773307712 | 1.84976410794621  | -12.37088263588470 |
| H  | 7.16394647682074 | 2.42354639965582  | -13.10226759518319 |
| N  | 6.90893785265589 | 1.75443140834621  | -11.15688344320892 |
| C  | 7.56129744356631 | 1.10064298978943  | -10.02395927054411 |
| H  | 8.66632327500180 | 1.18521923918890  | -10.07430792206676 |
| H  | 7.23118345147228 | 1.62069923274484  | -9.11185169530916  |
| C  | 7.19221664830952 | -0.38963623680270 | -9.86956836022549  |
| H  | 7.63165287201743 | -0.98614185901283 | -10.67860069598006 |
| H  | 7.61978926020592 | -0.76274187552170 | -8.92743153245932  |
| N  | 5.75258481365571 | -0.51969045176440 | -9.92897420781164  |
| C  | 5.01738642883680 | -0.62434119960889 | -8.84320254204752  |
| C  | 5.56497966376731 | -0.86742410200108 | -7.46629998457148  |
| H  | 6.07844788951219 | 0.02585127659403  | -7.07171532367337  |
| H  | 4.76386460886295 | -1.13065312856969 | -6.76431004762179  |
| H  | 6.29536273479102 | -1.69098028946214 | -7.46805435394581  |
| Co | 4.75818643921412 | -0.24852678835329 | -11.57449005882923 |
| H  | 6.75562669294459 | 2.72865780726812  | -10.93821331437297 |
| H  | 5.97625160809998 | -1.15376143073721 | -13.41653109736437 |
| C  | 4.47467986027289 | -2.20315782533259 | -11.85248097955971 |
| O  | 3.77110385220198 | -2.79334152467131 | -11.03629218499238 |
| O  | 5.05617637052823 | -2.64678949479943 | -12.86573209472555 |

x)  ${}^2[\text{Co}(\text{L})(\text{CO}_2\text{H})]^+$

|   |                  |                   |                    |
|---|------------------|-------------------|--------------------|
| C | 2.19676835553207 | 0.10736794557138  | -10.91167253534185 |
| C | 3.64564495866592 | -0.47598427441305 | -9.10591531881276  |
| C | 1.08214462251837 | 0.03023993698709  | -10.07355062067048 |
| C | 2.56014787692072 | -0.56945711837540 | -8.23663983676895  |
| C | 1.27223103925464 | -0.29622536335367 | -8.72454072582817  |
| H | 0.08192488135603 | 0.20833431402672  | -10.47063768716386 |
| H | 2.70868413001385 | -0.85953173274028 | -7.19588550742224  |
| H | 0.41313012897743 | -0.36400734281834 | -8.05537046408567  |
| N | 3.44061594366822 | -0.09266286597878 | -10.39186344919438 |
| C | 2.25167220288604 | 0.30338227946339  | -12.35254568075190 |
| N | 3.46833674902889 | 0.16381704229584  | -12.81911215942199 |
| C | 1.04902195245645 | 0.55976192180840  | -13.20128122191031 |
| H | 1.27807650293408 | 1.27789196409411  | -14.00205860549320 |
| H | 0.70837712354794 | -0.37223570806810 | -13.68524465114896 |
| H | 0.21972575976844 | 0.95797201479186  | -12.60212452762627 |
| C | 3.83408789248474 | 0.12830877404536  | -14.22387914879261 |
| H | 3.65790060050968 | -0.89260675939815 | -14.60304430778197 |
| H | 3.23312055912481 | 0.81938478602940  | -14.83229861853125 |
| C | 5.30926916838116 | 0.49193899879918  | -14.30481248913114 |
| H | 5.72272516516986 | 0.24866867873891  | -15.29677888930142 |
| H | 5.41575382166152 | 1.57192888137283  | -14.14365857558586 |
| N | 6.08090263205645 | -0.20774425408408 | -13.23961257584229 |
| C | 7.44569508306699 | 0.33909463950068  | -13.11002901499598 |
| H | 8.03823448037573 | -0.38462348455049 | -12.53707998990763 |
| H | 7.91771400688453 | 0.42326947477660  | -14.10433427177679 |
| C | 7.45541628863774 | 1.70551222039272  | -12.43196777827345 |
| H | 8.51161569676125 | 2.01499605763851  | -12.30522879811953 |
| H | 6.98542527652409 | 2.45163909433403  | -13.08791215593886 |
| N | 6.72647935424285 | 1.70283675400960  | -11.16883368212029 |
| C | 7.44502407946681 | 1.15497574329371  | -10.01787084549795 |
| H | 8.53020531824411 | 1.36597464340608  | -10.07124698573618 |

|    |                  |                   |                    |
|----|------------------|-------------------|--------------------|
| H  | 7.05130427554966 | 1.64459750333433  | -9.11515337421686  |
| C  | 7.23150819319645 | -0.36344218411859 | -9.85570932962610  |
| H  | 7.71667659521943 | -0.92283947907606 | -10.66408851789771 |
| H  | 7.67659544574675 | -0.69836916591979 | -8.90854127334610  |
| N  | 5.80292477394974 | -0.58054951453550 | -9.92092698601709  |
| C  | 5.06537333530292 | -0.69521384923042 | -8.84782619099240  |
| C  | 5.59567329258189 | -0.93739608302028 | -7.46622505389677  |
| H  | 5.99928249549567 | -0.00766034122088 | -7.03019645726857  |
| H  | 4.80300223860068 | -1.30186291100329 | -6.80062952922742  |
| H  | 6.40561602235655 | -1.68026121050601 | -7.47450317282045  |
| Co | 4.82074851343295 | -0.30045336631845 | -11.58589713281771 |
| H  | 6.39214670877735 | 2.63220599443521  | -10.95836537436915 |
| H  | 6.16051857524536 | -1.18548745802141 | -13.50688173839074 |
| C  | 4.46831335374184 | -2.20385254922174 | -11.79330596994855 |
| O  | 3.80142651379235 | -2.90787946141621 | -11.06585370249326 |
| O  | 5.05447040007995 | -2.74310440280312 | -12.90217260798500 |
| H  | 4.82146296280906 | -3.69218198495385 | -12.94628839171186 |

y)  $^2[\text{Co}(\text{L})(\text{CO})]^{2+}$

|   |                  |                   |                    |
|---|------------------|-------------------|--------------------|
| C | 2.18601823668700 | -0.08002664622206 | -10.90826447569065 |
| C | 3.58457763978672 | -0.72582314252579 | -9.12035428382910  |
| C | 1.06823689163406 | -0.04835148115633 | -10.07170099804191 |
| C | 2.50913955274064 | -0.71107501235160 | -8.23060807899220  |
| C | 1.24294990088293 | -0.36990707296630 | -8.72146206255193  |
| H | 0.08700566170951 | 0.21644708927882  | -10.46561444212598 |
| H | 2.65304639535434 | -0.96377446241701 | -7.18033430916749  |
| H | 0.38586791123557 | -0.35808763885518 | -8.04650743835541  |
| N | 3.38697641828983 | -0.40905167986209 | -10.40637157768789 |
| C | 2.24290518432711 | 0.13336201170076  | -12.37498743632512 |
| N | 3.42613722864531 | -0.05526588722775 | -12.85225745435623 |
| C | 1.01945442881326 | 0.43304077977381  | -13.16875686744833 |
| H | 1.26258990587057 | 0.93268454659067  | -14.11486573402071 |



|    |                  |                   |                    |
|----|------------------|-------------------|--------------------|
| H  | 0.49612799714625 | -0.51034981236137 | -13.40400573945951 |
| H  | 0.32843916531719 | 1.06241360138278  | -12.59237115817879 |
| C  | 3.78335511061529 | -0.12691077440851 | -14.26052670919853 |
| H  | 3.57765029059867 | -1.15666567288684 | -14.60017425287121 |
| H  | 3.18649708283274 | 0.55416236674687  | -14.88277131191101 |
| C  | 5.26214889960097 | 0.20192178478457  | -14.36444600637282 |
| H  | 5.65758776988243 | -0.06169333879592 | -15.35662756585232 |
| H  | 5.39204148423328 | 1.28072996519710  | -14.21995657438782 |
| N  | 6.04139325765208 | -0.49808556172242 | -13.29751059322932 |
| C  | 7.37194838508291 | 0.12760150930789  | -13.11558146268102 |
| H  | 7.99320151137476 | -0.57399871379403 | -12.54516505932763 |
| H  | 7.86000539932178 | 0.27852616383573  | -14.09257652408438 |
| C  | 7.24606667375312 | 1.45985159511217  | -12.38935640555217 |
| H  | 8.26099354793271 | 1.85814101906749  | -12.20775704964988 |
| H  | 6.72803063016470 | 2.19332283832730  | -13.02094942419014 |
| N  | 6.48592105223087 | 1.31594479539210  | -11.14683399596208 |
| C  | 7.28215144924072 | 0.85497817891266  | -9.99660945152788  |
| H  | 8.33998284897705 | 1.15866535010171  | -10.08553377530752 |
| H  | 6.87265951860576 | 1.32468486933388  | -9.09110793537653  |
| C  | 7.18843629670892 | -0.67114643087439 | -9.82200925138359  |
| H  | 7.69075605750826 | -1.20574367997695 | -10.63634581965786 |
| H  | 7.64859628889067 | -0.97694182973945 | -8.87351103965194  |
| N  | 5.76526352152730 | -0.93676687763114 | -9.88834413034823  |
| C  | 5.02210336972508 | -0.96633886891518 | -8.83467807265969  |
| C  | 5.50781100154738 | -1.08832828806466 | -7.42753080509084  |
| H  | 5.71760512735801 | -0.08694355193974 | -7.01316290295400  |
| H  | 4.74367317027570 | -1.55740096736250 | -6.79408884507067  |
| H  | 6.42843832681819 | -1.68158794463389 | -7.36989061454953  |
| Co | 4.81017848820398 | -0.58479400711242 | -11.62689169706380 |
| H  | 6.04114670568948 | 2.19479456026199  | -10.91833892409910 |
| H  | 6.20072057850867 | -1.45316130077660 | -13.60545619565188 |
| C  | 4.45816357578048 | -2.58011604445010 | -11.83779013086199 |
| O  | 4.17778006591774 | -3.66487433707807 | -11.71449823824335 |

z) <sup>18</sup>

|    |                   |                   |                   |
|----|-------------------|-------------------|-------------------|
| Mn | -0.59895777328590 | 9.11698249572691  | 7.59589084454266  |
| C  | -1.95615584797304 | 11.32859926156019 | 11.00847175247277 |
| C  | -2.57691979402394 | 11.11841647891011 | 6.88119734719822  |
| C  | -3.35095833393588 | 11.96696246161547 | 6.03395503903745  |
| C  | -3.29848828604625 | 11.81957428958679 | 4.66910816684499  |
| C  | -2.46640349889175 | 10.79683214945034 | 4.12202639731368  |
| C  | -1.74175344800858 | 10.00157559976896 | 4.97342551323587  |
| N  | -1.76253557030803 | 10.13008396867604 | 6.33227761136069  |
| H  | -3.97985142516865 | 12.73563372394177 | 6.48606464515572  |
| H  | -3.88598121866423 | 12.46629556668176 | 4.01451050952062  |
| H  | -2.40203524709879 | 10.63064588314196 | 3.04550063938416  |
| H  | -1.08902246327150 | 9.21635952666072  | 4.59041808803298  |
| C  | -2.47207874486825 | 11.21621482091214 | 8.28684821184000  |
| C  | -3.15285751400308 | 12.16858788453246 | 9.10054190806422  |
| C  | -2.90376139168011 | 12.24582375982726 | 10.44770591199443 |
| C  | -1.34262357063435 | 10.40859060793036 | 10.20354159682654 |
| N  | -1.54896408986882 | 10.30687298070468 | 8.84317555172629  |
| H  | -3.87647103791622 | 12.83732308541491 | 8.63058393326483  |
| H  | -3.42477830932838 | 12.96729617212248 | 11.07929241282143 |
| H  | -1.72574241001734 | 11.33957591735541 | 12.07559533857330 |
| H  | -0.63253000867319 | 9.69659507847401  | 10.62307873131581 |
| C  | 0.20935418110532  | 8.18008346446480  | 8.91190415181258  |
| C  | 0.91587260010006  | 9.69933702025560  | 6.96915449360190  |
| O  | 0.75224414863039  | 7.58088238707174  | 9.73420710710995  |
| O  | 1.88376145307338  | 10.24313989898231 | 6.58496522127445  |
| C  | -0.70076414373044 | 7.59077204725943  | 6.62345139872880  |
| O  | -0.75880314427141 | 6.62605138717828  | 5.99616605814212  |
| K  | 0.07432808275916  | 12.37378858479210 | 7.43315945980286  |

aa) <sup>1</sup>[Mn(bpy)(CO)<sub>3</sub>(CO<sub>2</sub>)]K

|    |                   |                   |                   |
|----|-------------------|-------------------|-------------------|
| Mn | -0.11694382018828 | 9.66839919664885  | 7.59168135684987  |
| C  | -2.19473571812539 | 11.28095789113674 | 11.07905556685099 |
| C  | -2.22509783415723 | 11.57898154322267 | 6.88004695441306  |
| C  | -3.08026343128695 | 12.37986040883773 | 6.10515073077455  |
| C  | -3.05922432718150 | 12.27008009721702 | 4.72184950936217  |
| C  | -2.17739727043761 | 11.34996943430886 | 4.13774167844074  |
| C  | -1.35499568263576 | 10.59627119480604 | 4.96202782700328  |
| N  | -1.36562311257217 | 10.70244911847339 | 6.30124574193817  |
| H  | -3.76625216164658 | 13.07273522063631 | 6.59134656895613  |
| H  | -3.72455434153785 | 12.87794381632751 | 4.10529533785775  |
| H  | -2.13204600335081 | 11.20956508118964 | 3.05640997588796  |
| H  | -0.65651769248502 | 9.87011559913341  | 4.54623752053477  |
| C  | -2.22889867494391 | 11.56332155970759 | 8.34227239209953  |
| C  | -3.06312656626513 | 12.37350383753952 | 9.13037164884058  |
| C  | -3.04726996851604 | 12.23840213807725 | 10.51140163603613 |
| C  | -1.39123150430009 | 10.52050288794545 | 10.24234881406784 |
| N  | -1.39298752823843 | 10.65390736180825 | 8.90500086072406  |
| H  | -3.72395664969987 | 13.09871795472489 | 8.65659287659703  |
| H  | -3.69252879135791 | 12.85688820853359 | 11.13876810701714 |
| H  | -2.15547591317899 | 11.11927372740220 | 12.15779770804646 |
| H  | -0.71284076720919 | 9.77029519535305  | 10.64822408374314 |
| C  | 1.01170903442066  | 9.11553548196249  | 8.88711094327023  |
| C  | 1.09145690540423  | 9.20023772589445  | 6.33415170858504  |
| O  | 1.72541423700704  | 8.78554245942954  | 9.72840072960144  |
| O  | 1.86281038636777  | 8.91148670040281  | 5.52952091929332  |
| C  | -1.02903001977615 | 8.10985729840078  | 7.48003714308931  |
| O  | -1.58664061550521 | 7.10524123711590  | 7.38487151254391  |
| C  | 1.08966810676142  | 11.69817973698194 | 7.66164346095219  |
| O  | 0.38283270808583  | 12.73537197747462 | 7.65813508424674  |
| O  | 2.33898923359082  | 11.65547808311839 | 7.68619761233168  |
| K  | 2.46843492795836  | 14.16270856518879 | 7.69019826804467  |

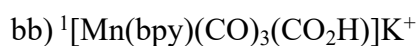

|    |                   |                   |                   |
|----|-------------------|-------------------|-------------------|
| Mn | -0.55293063428358 | 11.22630233186263 | 7.99305529826711  |
| C  | -2.40168354484023 | 14.90987169617508 | 9.38952765551526  |
| C  | -1.68246216548926 | 12.81377466790651 | 5.80196706872301  |
| C  | -2.13586698849176 | 13.16081800805517 | 4.52269094187193  |
| C  | -1.80747634714932 | 12.35420763577221 | 3.43612797350518  |
| C  | -1.02337387409440 | 11.21850261196451 | 3.65564812284714  |
| C  | -0.61028751226942 | 10.93206353299654 | 4.95243932504466  |
| N  | -0.92904553196458 | 11.70343985207527 | 6.00525832884951  |
| H  | -2.74947222357343 | 14.04928853826008 | 4.37707245013909  |
| H  | -2.16276433316109 | 12.60942973076450 | 2.43544465118497  |
| H  | -0.73771647934377 | 10.55269892572494 | 2.83976045121331  |
| H  | -0.00610678969004 | 10.05000166044447 | 5.16378943004729  |
| C  | -1.96894480213869 | 13.59467508262158 | 7.01694333149495  |
| C  | -2.67099289631000 | 14.80489396140682 | 7.01037163690642  |
| C  | -2.90045216410193 | 15.46953768640266 | 8.21226914560072  |
| C  | -1.70100868613485 | 13.70888565575088 | 9.31928519468658  |
| N  | -1.49489092345543 | 13.05583683104562 | 8.16676391225229  |
| H  | -3.04012438892298 | 15.22516183879099 | 6.07538977093091  |
| H  | -3.45483826123142 | 16.40980489060956 | 8.22739332416523  |
| H  | -2.55495592651711 | 15.39236706613916 | 10.35614129619417 |
| H  | -1.28973482204669 | 13.24912334704053 | 10.21765836515349 |
| C  | -0.30126641456353 | 10.98884854636822 | 9.76779635750463  |
| C  | 0.42749404910687  | 9.76379047574768  | 7.62348877591258  |
| O  | -0.14224456472570 | 10.85875112768803 | 10.89175049917207 |
| O  | 1.11124939003591  | 8.88343044655796  | 7.35384734615857  |
| C  | -2.14452982838394 | 10.28745191842844 | 8.08830711431781  |
| O  | -3.10589874759648 | 9.67878467853801  | 8.18096746297589  |
| C  | 1.24777750431287  | 12.19298449206218 | 7.99928267304746  |
| O  | 1.59112352864203  | 13.03883143484314 | 6.92729705613739  |
| O  | 2.13912996495546  | 12.12199079781680 | 8.82873000794138  |
| H  | 0.87352197706465  | 13.02308655927278 | 6.27874723215809  |

K 4.18515393336193 13.15688233086604 7.73098545508036

cc)  $^2[\text{Mn}(\text{bpy})(\text{CO})_3(\text{CO})]$

|    |                   |                   |                   |
|----|-------------------|-------------------|-------------------|
| Mn | -0.62447234670752 | 10.71899442596471 | 8.76773840142581  |
| C  | -2.07178125653398 | 14.44180946353124 | 10.49788658002227 |
| C  | -1.92713795533123 | 12.43316347544064 | 6.79913828528436  |
| C  | -2.46865836618486 | 12.85364921211598 | 5.54991150083222  |
| C  | -2.31206926391259 | 12.08216367635299 | 4.42282883417385  |
| C  | -1.59812706617272 | 10.85677742950955 | 4.51568421817229  |
| C  | -1.09956538915425 | 10.48789829895135 | 5.75150375343368  |
| N  | -1.24807223791009 | 11.22368051664797 | 6.86547935448386  |
| H  | -3.00886715169399 | 13.79916387782213 | 5.49488828663615  |
| H  | -2.73312534505882 | 12.41257212639805 | 3.47022150073775  |
| H  | -1.43830775107535 | 10.21271390318816 | 3.65062868017622  |
| H  | -0.55189488375478 | 9.55115104193920  | 5.86349185176851  |
| C  | -2.01970907320330 | 13.16426084421910 | 8.01324719095044  |
| C  | -2.68659076919395 | 14.41396843121723 | 8.16582527107986  |
| C  | -2.72124882248600 | 15.04438459171029 | 9.38662508010529  |
| C  | -1.43586260105731 | 13.23086560293480 | 10.30062327847561 |
| N  | -1.40432743836172 | 12.59159819412977 | 9.11973744515802  |
| H  | -3.17672170302142 | 14.86504469803604 | 7.30258170378248  |
| H  | -3.24182242804087 | 15.99787756014808 | 9.49994636575048  |
| H  | -2.06749607934219 | 14.90780879956149 | 11.48325818655962 |
| H  | -0.92190296382037 | 12.73867880040487 | 11.12757354001001 |
| C  | -0.14142553686428 | 10.41852870502612 | 10.50169767589042 |
| C  | -0.01114240542454 | 9.07113952978932  | 8.28796368465364  |
| O  | 0.16720043343810  | 10.22132147702313 | 11.58618248253285 |
| O  | 0.37430948905223  | 8.03441353664060  | 7.99348027565182  |
| C  | -2.37450587308409 | 10.08537149010652 | 9.07159553627880  |
| O  | -3.44360318366942 | 9.74700089628582  | 9.25088670914100  |
| C  | 1.02123628490877  | 11.54293870327668 | 8.38846397904285  |
| O  | 2.00188256166062  | 12.06879319062773 | 8.15840721678962  |

dd)  $^{192-}$

|    |                   |                   |                   |
|----|-------------------|-------------------|-------------------|
| Cr | -0.54202718384952 | 9.12902128639803  | 7.58616775093086  |
| C  | -2.02338452515632 | 11.32979385308651 | 11.03035467191908 |
| C  | -2.54248855031244 | 11.21875902660498 | 6.87870146933466  |
| C  | -3.36663179379173 | 12.03524577721002 | 6.03919995907713  |
| C  | -3.41388692463396 | 11.83295034230055 | 4.68339900966748  |
| C  | -2.61209124009286 | 10.77949941132785 | 4.12184187151205  |
| C  | -1.82966287852596 | 10.02492755763732 | 4.96299415293500  |
| N  | -1.75593240985568 | 10.18893307270400 | 6.31496575247987  |
| H  | -3.95762353440466 | 12.83178526749429 | 6.49807836353697  |
| H  | -4.04024630053944 | 12.46038239085554 | 4.04381264223449  |
| H  | -2.61886843299695 | 10.56955303932105 | 3.04960755601071  |
| H  | -1.20133674142348 | 9.22447018268913  | 4.56474858372432  |
| C  | -2.42419815391688 | 11.32613889886835 | 8.26901321759146  |
| C  | -3.13494226566676 | 12.24915992200658 | 9.09899992134844  |
| C  | -2.95541392535557 | 12.26945010808552 | 10.45821252962446 |
| C  | -1.36791172552306 | 10.45543561608477 | 10.20540011149248 |
| N  | -1.51880649222669 | 10.39157274260454 | 8.84213806687344  |
| H  | -3.83283445464912 | 12.94491357189890 | 8.62630763741605  |
| H  | -3.50211319772270 | 12.97232791011232 | 11.09142935886954 |
| H  | -1.83091539633695 | 11.30220981449722 | 12.10560061173584 |
| H  | -0.66247977992503 | 9.73490134464829  | 10.62287091958791 |
| C  | 0.19378589096586  | 8.18657602925729  | 8.94084977499185  |
| C  | 1.10116032697292  | 9.50908580306522  | 6.98781661926519  |
| O  | 0.69523090379873  | 7.55163836224371  | 9.81215893465995  |
| O  | 2.20734277508026  | 9.71600345652875  | 6.59812322359632  |
| C  | -0.51461161495553 | 7.62102093812372  | 6.59177724236094  |
| O  | -0.45700212595644 | 6.61690949034532  | 5.95715931222326  |

ee)  $^1[\text{Cr}(\text{bpy})(\text{CO})_3(\text{CO}_2)]^{2-}$

|    |                   |                   |                   |
|----|-------------------|-------------------|-------------------|
| Cr | -0.62938215537878 | 9.02642833605819  | 7.65630050254483  |
| C  | -1.73381617355080 | 11.58959664933111 | 11.00393920829769 |
| C  | -2.56678554460865 | 11.10404951403240 | 6.91657151630996  |
| C  | -3.46521057985723 | 11.86214729924221 | 6.13693058950274  |
| C  | -3.57442002449419 | 11.62520686554943 | 4.77713425253290  |
| C  | -2.75726062676822 | 10.62331329960964 | 4.20927063084314  |
| C  | -1.88212486808316 | 9.92976100689818  | 5.02445895984979  |
| N  | -1.76995279555009 | 10.14118120861364 | 6.35648774796793  |
| H  | -4.07112208058769 | 12.63459484597119 | 6.61185785963429  |
| H  | -4.26587774116022 | 12.20352941277090 | 4.16089173612131  |
| H  | -2.80369053353428 | 10.38726733382757 | 3.14395386053885  |
| H  | -1.23317233150856 | 9.15589795413171  | 4.61423129204419  |
| C  | -2.36434944396079 | 11.29908046252835 | 8.33532026775567  |
| C  | -3.04109990462385 | 12.26656905588930 | 9.10803711496312  |
| C  | -2.73379051398350 | 12.41711494423987 | 10.44996087356821 |
| C  | -1.11501483691252 | 10.65472007863373 | 10.19203404817842 |
| N  | -1.41214128751111 | 10.48862767814668 | 8.88592080408926  |
| H  | -3.80174656288977 | 12.89476534834284 | 8.64329553106081  |
| H  | -3.25032820100690 | 13.15970473894025 | 11.06182655124898 |
| H  | -1.44052994440532 | 11.67544721607242 | 12.05234679032469 |
| H  | -0.34609470072407 | 9.98960729046655  | 10.58671069478611 |
| C  | -0.08886441916468 | 7.96491507533677  | 9.02060131894003  |
| C  | 1.05893858562687  | 9.66986791003476  | 7.51638403831097  |
| O  | 0.26061758619931  | 7.26635914896388  | 9.90636474381596  |
| O  | 2.20889153761749  | 9.96323153189500  | 7.46570515988721  |
| C  | -0.20179545182115 | 7.75295182103508  | 6.43700820516691  |
| O  | 0.10177269738670  | 6.92645146386543  | 5.64876084768245  |
| C  | -2.56878175420737 | 7.87688875041688  | 7.97033626810795  |
| O  | -3.55909329665552 | 8.61468734389538  | 8.14872135239427  |
| O  | -2.59342678688183 | 6.62413476726012  | 7.93915218653103  |

ff)  ${}^1[\text{Cr}(\text{bpy})(\text{CO})_3(\text{CO}_2\text{H})]^-$

|    |                   |                   |                   |
|----|-------------------|-------------------|-------------------|
| Cr | -0.49627559762669 | 8.89684899133991  | 8.81925497473563  |
| C  | -1.32645680614893 | 9.60186429505423  | 13.06361507387571 |
| C  | -2.16048018813157 | 11.30358769319404 | 9.29832996590068  |
| C  | -2.98516870631270 | 12.41101208119361 | 9.05034454127313  |
| C  | -3.12830237755300 | 12.88062977152416 | 7.74873342835004  |
| C  | -2.42163092429172 | 12.23698643943327 | 6.72592836336446  |
| C  | -1.61195777341722 | 11.15359725281406 | 7.05072409691052  |
| N  | -1.48646585139726 | 10.68398437748700 | 8.30166520384733  |
| H  | -3.51301841209596 | 12.89675168364278 | 9.87055419152733  |
| H  | -3.77176296714133 | 13.73622365931933 | 7.53345642928253  |
| H  | -2.49338985722901 | 12.57214440884796 | 5.68951077929972  |
| H  | -1.04540347995218 | 10.62629388436848 | 6.28333961572842  |
| C  | -1.93621275391245 | 10.74230867613139 | 10.63696711724164 |
| C  | -2.47211025181383 | 11.29624497378270 | 11.80933062484026 |
| C  | -2.16698090141529 | 10.72210197131796 | 13.03954019719817 |
| C  | -0.83881454258650 | 9.10511998866474  | 11.86060589478496 |
| N  | -1.13346491614002 | 9.65267010820254  | 10.66990249549367 |
| H  | -3.11356500869318 | 12.17559291394004 | 11.75732848039404 |
| H  | -2.57370305541192 | 11.14385826133384 | 13.96121870435550 |
| H  | -1.04655399385682 | 9.11305524521055  | 13.99886453276746 |
| H  | -0.19040823194476 | 8.22974027831025  | 11.83762439315938 |
| C  | 0.19989951853386  | 7.36304146614767  | 9.50059284901899  |
| C  | 1.19069023008707  | 9.60230886804794  | 8.95906074006719  |
| O  | 0.70461727868855  | 6.40053738759169  | 9.95907102866382  |
| O  | 2.31044317501203  | 9.95728096347192  | 9.03164413298859  |
| C  | -0.10934113952873 | 8.38449843007018  | 7.11462368674694  |
| O  | 0.17257255525326  | 8.06918899145065  | 6.01453274208941  |
| C  | -2.47258308298162 | 8.09987965200609  | 8.67754896664776  |
| O  | -3.52636173762433 | 8.63575511565844  | 8.98151599722661  |
| O  | -2.63651187343846 | 6.81785242363201  | 8.16483630782684  |
| H  | -1.74354996192918 | 6.50019906780994  | 7.96081677039274  |

gg)  ${}^2[\text{Cr}(\text{bpy})(\text{CO})_4]^-$



|    |                   |                   |                   |
|----|-------------------|-------------------|-------------------|
| Cr | -0.58413102878378 | 8.09876190562792  | 8.30119528567082  |
| C  | -0.06020689281358 | 9.82456392654444  | 12.34131539756681 |
| C  | -1.03924971020876 | 11.05870144712152 | 8.42845032263220  |
| C  | -1.34702017410004 | 12.38358880483461 | 7.98995011290202  |
| C  | -1.64710483694915 | 12.63158861616981 | 6.66897935164528  |
| C  | -1.65233080173233 | 11.55093674747545 | 5.74640107279528  |
| C  | -1.35143068296877 | 10.28277117091819 | 6.23091941919299  |
| N  | -1.05005132775439 | 10.01828942127513 | 7.50667366227522  |
| H  | -1.34042601804101 | 13.20209644895994 | 8.71133718270629  |
| H  | -1.88550347649548 | 13.64547294964774 | 6.33585317079480  |
| H  | -1.89668897493973 | 11.69543127072076 | 4.69299162874500  |
| H  | -1.35219003431898 | 9.42275934430014  | 5.55801314012968  |
| C  | -0.71530333698011 | 10.70826958275158 | 9.76890954594501  |
| C  | -0.69381117885825 | 11.62544771126398 | 10.86400101721672 |
| C  | -0.37660341660502 | 11.19408158305937 | 12.13320350425347 |
| C  | -0.09451338806915 | 8.97973236759822  | 11.23827272741305 |
| N  | -0.41068728090665 | 9.37260771388924  | 9.99939842517843  |
| H  | -0.94699678436634 | 12.67253065990922 | 10.68990874147700 |
| H  | -0.37175159016408 | 11.89943103728709 | 12.96823713855249 |
| H  | 0.21013670470659  | 9.43238509903294  | 13.32296389970975 |
| H  | 0.14474118607370  | 7.92050015661450  | 11.35187825764035 |
| C  | -0.16264128232353 | 6.55382716334033  | 9.18969607839600  |
| C  | 1.23256406687718  | 8.37404636973592  | 7.82985660913517  |
| O  | 0.08337534118424  | 5.55549653520927  | 9.75220442713967  |
| O  | 2.33762928475392  | 8.49737602876867  | 7.50714817940896  |
| C  | -0.83295390127993 | 7.15158588496621  | 6.75214738513496  |
| O  | -0.98974976018794 | 6.51426350725005  | 5.78135319833175  |
| C  | -2.39137538408862 | 7.76957812407026  | 8.75464888105269  |
| O  | -3.47227630465998 | 7.47620971465710  | 9.03114345795777  |

hh) <sup>1</sup>10<sup>0</sup>

|    |           |           |           |
|----|-----------|-----------|-----------|
| Ru | -0.305535 | 0.486769  | -1.002611 |
| C  | -0.469505 | 2.654643  | -5.394689 |
| C  | -0.646905 | 4.479424  | 0.872097  |
| C  | -0.590637 | 3.114699  | 0.644701  |
| N  | -0.537477 | 2.633091  | -0.574384 |
| C  | -0.536615 | 3.395523  | -1.709763 |
| C  | -0.588276 | 4.809340  | -1.526056 |
| C  | -0.641199 | 5.343674  | -0.258833 |
| H  | -0.588060 | 2.400448  | 1.470466  |
| H  | -0.584009 | 5.462929  | -2.399183 |
| H  | -0.680080 | 6.426933  | -0.121948 |
| H  | -0.695379 | 4.867435  | 1.890160  |
| C  | -0.490404 | 2.730375  | -2.962921 |
| N  | -0.430969 | 1.334122  | -2.921802 |
| C  | -0.417329 | 0.640684  | -4.077800 |
| C  | -0.434662 | 1.232549  | -5.326348 |
| C  | -0.500521 | 3.384759  | -4.229300 |
| H  | -0.421145 | 0.613050  | -6.223610 |
| H  | -0.477008 | 3.163588  | -6.361578 |
| H  | -0.537343 | 4.474202  | -4.266129 |
| H  | -0.407998 | -0.443828 | -3.975382 |
| C  | -0.352983 | -1.384700 | 3.581314  |
| C  | 0.861366  | -0.516646 | 1.690757  |
| N  | -0.341282 | -0.326013 | 1.038061  |
| C  | -1.540844 | -0.556678 | 1.641199  |
| C  | -1.551717 | -1.118851 | 2.934402  |
| C  | 0.883780  | -1.075555 | 2.958333  |
| H  | -2.501405 | -1.341954 | 3.423620  |
| H  | -0.358394 | -1.825755 | 4.579549  |
| H  | 1.825678  | -1.266384 | 3.471868  |
| C  | -2.654909 | -0.200753 | 0.819533  |
| N  | -2.324695 | 0.389552  | -0.398510 |

|   |           |           |           |
|---|-----------|-----------|-----------|
| C | -3.291831 | 0.808094  | -1.231467 |
| C | -4.637476 | 0.660190  | -0.946777 |
| C | -5.005390 | 0.041579  | 0.277761  |
| C | -4.020801 | -0.380555 | 1.147885  |
| H | -2.947814 | 1.273208  | -2.156667 |
| H | -5.384648 | 1.022328  | -1.653660 |
| H | -6.057799 | -0.100181 | 0.534855  |
| H | -4.283158 | -0.858223 | 2.093209  |
| C | -0.206550 | -1.474907 | -1.752915 |
| O | -0.291112 | -2.576330 | -2.259382 |
| H | 1.789068  | -0.263636 | 1.199070  |

ii)  $^1[\text{Ru}(\text{bpy})_2(\text{CO})(\text{CO}_2)]$

|    |           |          |           |
|----|-----------|----------|-----------|
| Ru | -0.159556 | 0.493225 | -1.020999 |
| C  | -0.323526 | 2.661099 | -5.413078 |
| C  | -0.500926 | 4.485880 | 0.853709  |
| C  | -0.444658 | 3.121155 | 0.626313  |
| N  | -0.391498 | 2.639547 | -0.592773 |
| C  | -0.390636 | 3.401980 | -1.728151 |
| C  | -0.442297 | 4.815796 | -1.544445 |
| C  | -0.495220 | 5.350131 | -0.277221 |
| H  | -0.442081 | 2.406905 | 1.452078  |
| H  | -0.438030 | 5.469385 | -2.417571 |
| H  | -0.534101 | 6.433390 | -0.140336 |
| H  | -0.549400 | 4.873892 | 1.871772  |
| C  | -0.344425 | 2.736831 | -2.981309 |
| N  | -0.284989 | 1.340579 | -2.940190 |
| C  | -0.271350 | 0.647140 | -4.096188 |
| C  | -0.288683 | 1.239006 | -5.344737 |
| C  | -0.354542 | 3.391216 | -4.247689 |
| H  | -0.275166 | 0.619506 | -6.241998 |
| H  | -0.331029 | 3.170045 | -6.379966 |

|   |           |           |           |
|---|-----------|-----------|-----------|
| H | -0.391364 | 4.480659  | -4.284517 |
| H | -0.262019 | -0.437371 | -3.993770 |
| C | -0.207004 | -1.378244 | 3.562926  |
| C | 1.007345  | -0.510189 | 1.672369  |
| N | -0.195303 | -0.319556 | 1.019673  |
| C | -1.394865 | -0.550222 | 1.622811  |
| C | -1.405738 | -1.112395 | 2.916014  |
| C | 1.029759  | -1.069099 | 2.939945  |
| H | -2.355426 | -1.335498 | 3.405231  |
| H | -0.212415 | -1.819298 | 4.561160  |
| H | 1.971657  | -1.259927 | 3.453479  |
| C | -2.508930 | -0.194297 | 0.801145  |
| N | -2.178716 | 0.396009  | -0.416898 |
| C | -3.145852 | 0.814550  | -1.249855 |
| C | -4.491497 | 0.666647  | -0.965165 |
| C | -4.859411 | 0.048036  | 0.259373  |
| C | -3.874822 | -0.374099 | 1.129497  |
| H | -2.801835 | 1.279664  | -2.175055 |
| H | -5.238669 | 1.028785  | -1.672048 |
| H | -5.911820 | -0.093725 | 0.516466  |
| H | -4.137179 | -0.851766 | 2.074820  |
| C | -0.060571 | -1.468451 | -1.771303 |
| O | -0.145133 | -2.569874 | -2.277770 |
| H | 1.935047  | -0.257180 | 1.180682  |
| C | 1.823530  | 0.439865  | -1.275006 |
| O | 2.547224  | 0.785033  | -0.201355 |
| O | 2.354738  | 0.339230  | -2.501094 |

jj)  $^1[\text{Ru}(\text{bpy})_2(\text{CO})(\text{CO}_2\text{H})]^+$

|    |                   |                  |                   |
|----|-------------------|------------------|-------------------|
| Ru | -0.13659623131226 | 0.38996296844432 | -1.10344027358489 |
| C  | -0.43792786594914 | 2.68606056972834 | -5.38131802664696 |
| C  | -0.38648201348228 | 4.32040700824230 | 0.92119152372274  |

|   |                   |                   |                   |
|---|-------------------|-------------------|-------------------|
| C | -0.30745716974781 | 2.95541125115191  | 0.66183869905279  |
| N | -0.28908670531862 | 2.46315176105446  | -0.58297795792878 |
| C | -0.37714606497464 | 3.30092162920709  | -1.64368185720308 |
| C | -0.45508728362008 | 4.68397410480164  | -1.45537444916031 |
| C | -0.45314272356039 | 5.19993153859338  | -0.16017546432019 |
| H | -0.24964895174348 | 2.23267673531195  | 1.47547248473480  |
| H | -0.51697487900250 | 5.35399221219901  | -2.31147200804122 |
| H | -0.50844818437421 | 6.27790167368895  | 0.00189699151887  |
| H | -0.39143857948910 | 4.67801870754315  | 1.95157663606777  |
| C | -0.38458290655678 | 2.65412224316971  | -2.96854519728454 |
| N | -0.32717090400579 | 1.29560257161137  | -2.96767012685956 |
| C | -0.32525048597270 | 0.63848443007520  | -4.13684022744281 |
| C | -0.38257925477343 | 1.29245422694338  | -5.36393159474307 |
| C | -0.44090547589797 | 3.37017044318866  | -4.16717228741102 |
| H | -0.37805036237740 | 0.70654479323872  | -6.28398295539955 |
| H | -0.47755827075588 | 3.23656314669350  | -6.32287980831245 |
| H | -0.48293481145856 | 4.45828906342757  | -4.15228936852323 |
| H | -0.27264082793402 | -0.44687862816971 | -4.08491904267226 |
| C | -0.26560347832731 | -1.11199551717817 | 3.53614402797206  |
| C | 1.00202090390461  | -0.55100652045869 | 1.58075566302320  |
| N | -0.11256353475981 | -0.26240694732573 | 0.89188605100050  |
| C | -1.32642232321132 | -0.40169896901298 | 1.48921146237952  |
| C | -1.42370519835503 | -0.82396712461190 | 2.81794136625208  |
| C | 0.97074012501167  | -0.97577231518775 | 2.90502333148843  |
| H | -2.39917552111672 | -0.93439252127511 | 3.28857266542118  |
| H | -0.33247724459014 | -1.45107362042775 | 4.57133702470352  |
| H | 1.90530633002740  | -1.20086319482810 | 3.42006769056290  |
| C | -2.50735008198991 | -0.09200935206938 | 0.65776522269252  |
| N | -2.24606648835958 | 0.27252480904198  | -0.61605652854038 |
| C | -3.24589527608494 | 0.56592128800473  | -1.45046620416996 |
| C | -4.58067270675946 | 0.51002405436950  | -1.05529773409139 |
| C | -4.87189934399786 | 0.13577244071504  | 0.25742506952899  |
| C | -3.82392871528773 | -0.16714734265425 | 1.12547060502400  |

|   |                   |                   |                   |
|---|-------------------|-------------------|-------------------|
| H | -2.96403190625826 | 0.85636499829680  | -2.46330687160766 |
| H | -5.36833842295709 | 0.75702256748031  | -1.76795631483154 |
| H | -5.90443746965419 | 0.07792421676401  | 0.60791730717085  |
| H | -4.03390302948982 | -0.46755265084157 | 2.15111397302114  |
| C | 0.01665029104173  | -1.36023597961000 | -1.68291974381658 |
| O | 0.14050802820202  | -2.45390870549065 | -2.03607982322013 |
| H | 1.94451577949027  | -0.42719414214736 | 1.05160180073310  |
| C | 1.87455746511030  | 0.60416132790716  | -1.43278887389469 |
| O | 2.59333636858182  | 1.41345205998803  | -0.57543268323728 |
| O | 2.52109435004837  | 0.12912746108218  | -2.34547002092127 |
| H | 2.00473464008808  | 1.78142278132467  | 0.09994407079388  |

kk)  $^1[\text{Ru}(\text{bpy})_2(\text{CO})_2]^{2+}$

|    |                   |                  |                   |
|----|-------------------|------------------|-------------------|
| Ru | 0.26030407497020  | 1.14393210947526 | -0.65102191488265 |
| C  | -0.22088898203993 | 3.50035235263254 | -4.88074602123644 |
| C  | 2.14688392480079  | 4.73017599136193 | 1.06065470866910  |
| C  | 1.71301378504006  | 3.42363219008036 | 0.85337809678070  |
| N  | 1.17043385223638  | 3.03203729828416 | -0.30490005865038 |
| C  | 1.05297160346291  | 3.90674670220477 | -1.33405062852374 |
| C  | 1.47736837520916  | 5.22976680593024 | -1.19460447172177 |
| C  | 2.02219151203580  | 5.64894013838349 | 0.01892741323547  |
| H  | 1.80172607338769  | 2.67325891250509 | 1.63654330427784  |
| H  | 1.37109389404030  | 5.92988240838275 | -2.02198058327826 |
| H  | 2.34975285253367  | 6.68222936521342 | 0.14640394428155  |
| H  | 2.57599008097173  | 5.01115487398165 | 2.02296623482088  |
| C  | 0.44734732018764  | 3.37025953997197 | -2.56635331007257 |
| N  | -0.03590290255018 | 2.10340462743241 | -2.48890542970296 |
| C  | -0.60651915850386 | 1.53670701543227 | -3.56222541226957 |
| C  | -0.72193571632920 | 2.20283072185229 | -4.77747964205970 |
| C  | 0.36485685308729  | 4.08899779955137 | -3.76100508536299 |
| H  | -1.19429224597072 | 1.69840535912780 | -5.62100223213615 |
| H  | -0.28156073245651 | 4.05116456658923 | -5.82081888731457 |

|   |                   |                   |                   |
|---|-------------------|-------------------|-------------------|
| H | 0.76739543537672  | 5.09939230588021  | -3.81890942950565 |
| H | -0.97757439880286 | 0.52032043591207  | -3.44600290684329 |
| C | 0.78212989530425  | 0.01800878575927  | 4.04833885148649  |
| C | 1.54974705207105  | -0.18416608309003 | 1.78721290542149  |
| N | 0.51690863615483  | 0.54242651864615  | 1.33647491680967  |
| C | -0.41801108976612 | 1.00953068836473  | 2.20572975951716  |
| C | -0.29890196242241 | 0.76196093165662  | 3.57490229961817  |
| C | 1.71964608544680  | -0.46954489468342 | 3.13833174169642  |
| H | -1.04005706900816 | 1.15716168748081  | 4.26787451999848  |
| H | 0.88980212460010  | -0.17960683502891 | 5.11635759334108  |
| H | 2.57755416380073  | -1.06117826356063 | 3.45953236881690  |
| C | -1.52178632836172 | 1.78795952723457  | 1.61243694668866  |
| N | -1.43486262452064 | 2.01099496155221  | 0.27807049487119  |
| C | -2.37926988772791 | 2.71331263333124  | -0.35609803829058 |
| C | -3.48046083456404 | 3.23905150780911  | 0.31434909333263  |
| C | -3.59606530611084 | 3.01379752645260  | 1.68642071644260  |
| C | -2.60741451959316 | 2.27879119576157  | 2.34143962437961  |
| H | -2.25163195539226 | 2.85398687022840  | -1.42828168946618 |
| H | -4.22852771234566 | 3.80539876329778  | -0.24094715472746 |
| H | -4.44803556089772 | 3.40281991952196  | 2.24674138110825  |
| H | -2.68673117868144 | 2.08171797906550  | 3.40977940928059  |
| C | -0.75872464988734 | -0.41348780954880 | -1.01706968683328 |
| O | -1.42323168790941 | -1.31756296607349 | -1.22573792002073 |
| H | 2.26130447605825  | -0.54288377436318 | 1.04634283684142  |
| C | 1.82639692273245  | 0.34656081265369  | -1.37984915781610 |
| O | 2.74506205633331  | -0.14038653065316 | -1.83996328700134 |

ll)  $^{11}0$

|    |                   |                   |                   |
|----|-------------------|-------------------|-------------------|
| Ru | -0.30471234045047 | 1.06445797447218  | -0.65850128523122 |
| C  | -0.10456236427474 | -0.26429226545648 | -5.41163970137418 |
| C  | -0.56378634323850 | 5.30102292869196  | -2.06138009856311 |
| C  | -0.54427991143259 | 4.13467711070031  | -1.30450628016682 |

|   |                   |                   |                   |
|---|-------------------|-------------------|-------------------|
| N | -0.43761596772481 | 2.91056647952846  | -1.85005955961448 |
| C | -0.36206592055943 | 2.80607527404765  | -3.20391366372744 |
| C | -0.37993277126951 | 3.93890238274061  | -4.02906990173691 |
| C | -0.47748176909302 | 5.20302211215090  | -3.45532616779126 |
| H | -0.61133847574325 | 4.16081260413099  | -0.21647653994553 |
| H | -0.31351403256122 | 3.82950210601724  | -5.11177033680872 |
| H | -0.48842067192371 | 6.09584272393106  | -4.08344623391701 |
| H | -0.64741411232534 | 6.26749810249184  | -1.56123871277054 |
| C | -0.26070349815588 | 1.42824850561141  | -3.69678732549030 |
| N | -0.25011026347735 | 0.48250557738241  | -2.71755708324024 |
| C | -0.17159337249671 | -0.81498135632370 | -3.07303586435470 |
| C | -0.10057073234102 | -1.22987870187520 | -4.39675462111091 |
| C | -0.18389833180810 | 1.07730159940043  | -5.05189814640746 |
| H | -0.03969391346373 | -2.29512976854318 | -4.62684199091507 |
| H | -0.04572517963305 | -0.55630000587959 | -6.46220886743056 |
| H | -0.18841621011282 | 1.85244011900962  | -5.81844927809444 |
| H | -0.16531281745476 | -1.52857108379198 | -2.24832016295992 |
| C | -0.00436364881729 | -1.87545175004901 | 3.05242768532620  |
| C | 4.05050342191889  | 1.62262177200010  | -0.72945242239192 |
| C | 2.70049515660637  | 1.72675230155720  | -1.00208544302948 |
| N | 1.74367791718258  | 1.05516857489658  | -0.31017638636717 |
| C | 2.15182085375669  | 0.20539642645375  | 0.71879918309883  |
| C | 3.52103341215944  | 0.06141152157931  | 1.02555539789967  |
| C | 4.47574999929898  | 0.76633991876863  | 0.31424426493953  |
| H | 2.33174263684030  | 2.37137216814272  | -1.80217042210586 |
| H | 3.81588827124742  | -0.60998079304328 | 1.83412949427310  |
| H | 5.53531075429190  | 0.66223697090417  | 0.55872083383871  |
| H | 4.76531742347607  | 2.19964468795014  | -1.31895679348377 |
| C | 1.07060703417498  | -0.44667889355414 | 1.40851453009717  |
| N | -0.18737926121641 | -0.07640664635329 | 0.89456775601767  |
| C | -1.35076315408177 | -0.64679963718034 | 1.44786998692780  |
| C | -1.25699492980881 | -1.52565058924975 | 2.52278291110159  |
| C | 1.15670181039750  | -1.33085249755211 | 2.47906299148427  |



|   |                   |                   |                   |
|---|-------------------|-------------------|-------------------|
| H | -2.16779535851433 | -1.94617321786631 | 2.95459495057250  |
| H | 0.06800562173078  | -2.56468858794484 | 3.89520962490941  |
| H | 2.13704890992068  | -1.60375632440861 | 2.87616787580857  |
| C | -2.54412529605219 | -0.19052398858201 | 0.78815070260589  |
| N | -2.31181177836837 | 0.71444515436773  | -0.24958706938607 |
| C | -3.38949586852853 | 1.21038887484403  | -0.91380127751538 |
| C | -4.69385154468154 | 0.87111730545224  | -0.61254978151131 |
| C | -4.94051339549902 | -0.04830296963970 | 0.43605574394969  |
| C | -3.86042070582975 | -0.57180063200410 | 1.12475104453999  |
| H | -3.15581613439876 | 1.90953380654630  | -1.71905808140358 |
| H | -5.51013701678357 | 1.31400293159866  | -1.18659437641242 |
| H | -5.95872358637619 | -0.34444840814527 | 0.69924575990124  |
| H | -4.01578027050608 | -1.28411414792580 | 1.93728560096598  |

mm)  $^1[\text{Ru}(\text{tpy})(\text{bpy})(\text{CO}_2)]$

|    |                   |                  |                   |
|----|-------------------|------------------|-------------------|
| Ru | -0.35373417236473 | 0.51937931714113 | -0.84429142074292 |
| C  | -0.59737104215342 | 2.71311867836779 | -5.23713240768294 |
| C  | -0.72768251137231 | 4.57675951036168 | 0.99645560818663  |
| C  | -0.64062180186693 | 3.20367417254907 | 0.78633970978647  |
| N  | -0.58545544617946 | 2.66437389914697 | -0.43736154220954 |
| C  | -0.62488022777133 | 3.46587457815000 | -1.52499809622186 |
| C  | -0.70874970571293 | 4.85888191907951 | -1.39201408174367 |
| C  | -0.75802221899024 | 5.42075234717834 | -0.11849711336404 |
| H  | -0.60743969463072 | 2.50409811802180 | 1.62373605719131  |
| H  | -0.73652164069228 | 5.49864457624926 | -2.27347640051438 |
| H  | -0.82291318700789 | 6.50373615057023 | 0.00393754905339  |
| H  | -0.76902888192361 | 4.97398155182910 | 2.01215466343654  |
| C  | -0.58279399458973 | 2.76663808538229 | -2.82140345270363 |
| N  | -0.51042723801386 | 1.40799892727417 | -2.76016454769184 |
| C  | -0.50611933938799 | 0.70866380403534 | -3.91181380109530 |
| C  | -0.54407904638419 | 1.31870907979093 | -5.16129807112499 |
| C  | -0.62420046437114 | 3.43891673654825 | -4.04936994361713 |

|   |                   |                   |                   |
|---|-------------------|-------------------|-------------------|
| H | -0.53297637141815 | 0.69998392878804  | -6.06040382212256 |
| H | -0.62515139096290 | 3.22750962374321  | -6.19987143962666 |
| H | -0.68127738765800 | 4.52665914428785  | -4.07495322919918 |
| H | -0.49961276449491 | -0.37431593661918 | -3.77627295053859 |
| C | 0.00951279583977  | -1.16837351215796 | 3.52379065373583  |
| C | 3.95607445812563  | 1.19472908993706  | -1.12024061529225 |
| C | 2.59550142772688  | 1.17533552119367  | -1.41043720683722 |
| N | 1.68245451862248  | 0.65854137055513  | -0.57418449793227 |
| C | 2.09858480239520  | 0.13684582585582  | 0.62240423799571  |
| C | 3.45357154613225  | 0.12000282696425  | 0.96835326542312  |
| C | 4.39691714930430  | 0.64829750413059  | 0.09072966584038  |
| H | 2.20905205832999  | 1.58043999399725  | -2.34623192222466 |
| H | 3.76524393831059  | -0.30611008982621 | 1.92266299744463  |
| H | 5.45661043281899  | 0.64176317974622  | 0.35423747347343  |
| H | 4.65379976196954  | 1.62694236405451  | -1.83898804561768 |
| C | 1.02413735067097  | -0.32819396861160 | 1.50462919386318  |
| N | -0.21143553678446 | -0.17291681260285 | 0.96359420248139  |
| C | -1.34122511432136 | -0.50451379050921 | 1.64308597440799  |
| C | -1.25344718826986 | -1.00031275115212 | 2.94442876924232  |
| C | 1.15727254291063  | -0.83492553282917 | 2.79981943254237  |
| H | -2.15441194042063 | -1.26863442413386 | 3.49720888984364  |
| H | 0.09841642993704  | -1.56748652645442 | 4.53548138450280  |
| H | 2.14400050411532  | -0.96680353908195 | 3.24457003782727  |
| C | -2.55817455210686 | -0.31642450335078 | 0.84333567802217  |
| N | -2.33658483598076 | 0.11974206113623  | -0.43650902477291 |
| C | -3.38028829948518 | 0.26084243977937  | -1.26647913455872 |
| C | -4.69130304830101 | 0.00957346159068  | -0.87113042706296 |
| C | -4.93624543791475 | -0.40613099782080 | 0.44188467488035  |
| C | -3.85326710171537 | -0.57231975757681 | 1.30345499187822  |
| H | -3.14081169063700 | 0.59732175126642  | -2.27533892291796 |
| H | -5.50499833742116 | 0.14658563276310  | -1.58507540805040 |
| H | -5.95181176261338 | -0.60617116499228 | 0.78987732875806  |
| H | -4.00938393422680 | -0.91253344624725 | 2.32792508811717  |

|   |                   |                   |                   |
|---|-------------------|-------------------|-------------------|
| C | -0.11727442168795 | -1.42616860478557 | -1.54105681107172 |
| O | 0.80585877911508  | -2.12109786263885 | -1.04410971946281 |
| O | -0.90384241949144 | -1.83975841307444 | -2.44213616093355 |

nn)  $^1[\text{Ru}(\text{tpy})(\text{bpy})(\text{CO})]^{2+}$

|    |                   |                   |                   |
|----|-------------------|-------------------|-------------------|
| Ru | -0.29839446069356 | 0.28095704176294  | -0.99557724668042 |
| C  | -0.58241584003453 | 2.68764357927227  | -5.26556698400530 |
| C  | -0.68055209810029 | 4.16524316467903  | 1.09157718107262  |
| C  | -0.57897179516912 | 2.81511236838107  | 0.79820060374022  |
| N  | -0.53234156099542 | 2.32899452087578  | -0.44923117979610 |
| C  | -0.59461081184760 | 3.19445825428731  | -1.53563119522600 |
| C  | -0.69194239299040 | 4.59644089687568  | -1.28792705578917 |
| C  | -0.73296297580500 | 5.07772738716730  | 0.00162730616329  |
| H  | -0.52647805019489 | 2.07424241378428  | 1.59747355155224  |
| H  | -0.73541868832285 | 5.28752561942082  | -2.13055865792541 |
| H  | -0.80800569635489 | 6.15244486187165  | 0.18551622544194  |
| H  | -0.71518177429069 | 4.50393042364955  | 2.12787846474720  |
| C  | -0.55749734527333 | 2.60124514059529  | -2.82971749807111 |
| N  | -0.45878238503764 | 1.21157480439264  | -2.88166033981614 |
| C  | -0.43450100427573 | 0.60115999800098  | -4.07833924047477 |
| C  | -0.49421154972365 | 1.26971611306930  | -5.29103350809432 |
| C  | -0.61407688543070 | 3.33587470077578  | -4.05143133690456 |
| H  | -0.46817782103782 | 0.70841802964096  | -6.22591294324469 |
| H  | -0.62637109730867 | 3.25989987054575  | -6.19551355637848 |
| H  | -0.68601536949626 | 4.42363889208658  | -4.01504462662395 |
| H  | -0.35873375952396 | -0.48707986748078 | -4.05310068947140 |
| C  | 0.04593263549013  | -1.03996962813476 | 3.52820135429452  |
| C  | 4.00234953210137  | 1.14487899734632  | -1.22509125359399 |
| C  | 2.65719649171199  | 1.02355968028742  | -1.53888466416649 |
| N  | 1.74705608960106  | 0.53313195387444  | -0.68539695389567 |
| C  | 2.13983386660490  | 0.13902990033338  | 0.59439156649888  |
| C  | 3.50936209976314  | 0.21699879380283  | 0.94934587437524  |

|   |                   |                   |                   |
|---|-------------------|-------------------|-------------------|
| C | 4.43568926301189  | 0.71355485273455  | 0.05385517521345  |
| H | 2.27067441532856  | 1.32814150786152  | -2.51337837704594 |
| H | 3.82297506607750  | -0.11950898042320 | 1.93898647951756  |
| H | 5.48905567948140  | 0.77876069372291  | 0.33661122953045  |
| H | 4.69710490567510  | 1.55694803351240  | -1.95775144243950 |
| C | 1.09045444978033  | -0.29754418538580 | 1.47295514378699  |
| N | -0.16737918466249 | -0.26956406504488 | 0.91281506524507  |
| C | -1.30304154768942 | -0.57124125459051 | 1.58788166523431  |
| C | -1.23265380747663 | -0.96340562046023 | 2.91656577105198  |
| C | 1.19327983282118  | -0.70832128817781 | 2.81730533685542  |
| H | -2.13197964795150 | -1.21188230491194 | 3.48008348889916  |
| H | 0.12757589215019  | -1.36510359910541 | 4.56690630504586  |
| H | 2.17004330381112  | -0.76341745121612 | 3.30079238740285  |
| C | -2.52259944738990 | -0.40942590539313 | 0.77770137264627  |
| N | -2.32609657743010 | -0.00348242738807 | -0.51747884088841 |
| C | -3.37870999598462 | 0.18357329753578  | -1.32422397298644 |
| C | -4.68783341573164 | -0.02305585459169 | -0.90358146953924 |
| C | -4.91182723242123 | -0.43885609324295 | 0.41593210795617  |
| C | -3.81970880879903 | -0.62945766519144 | 1.25760640725276  |
| H | -3.14521614657883 | 0.51374600925304  | -2.33753902027983 |
| H | -5.51234971155885 | 0.14407949191823  | -1.59792318633528 |
| H | -5.92489657153700 | -0.61387405634780 | 0.78436438227886  |
| H | -3.96651865070738 | -0.95649867192630 | 2.28741825122557  |
| C | -0.08298062799110 | -1.43788140323319 | -1.61003641655768 |
| O | 0.06520356740685  | -2.52320989307179 | -1.98848932179855 |

## 9) Bibliography

---

<sup>1</sup> (a) C. Costentin, S. Drouet, G. Passard, M. Robert and J. M. Saveant, Proton-coupled electron transfer cleavage of heavy-atom bonds in electrocatalytic processes. Cleavage of a C-O bond in the catalyzed electrochemical reduction of CO<sub>2</sub>, *J. Am. Chem. Soc.*, 2013, **135**(24), 9023-9031.

- 
- <sup>2</sup> D.C. Lacy, C. C. L. McCrory and J. C. Peters, Studies of cobalt-mediated electrocatalytic CO<sub>2</sub> reduction using a redox-active ligand, *Inorg. Chem.*, 2014, **53**(10), 4980-4988.
- <sup>3</sup> J. Tory, B. Setterfield-Price, R. A. Dryfe and F. Hartl, [M(CO)<sub>4</sub>(2, 2'-Bipyridine)] (M= Cr, Mo, W) as Efficient Catalysts for Electrochemical Reduction of CO<sub>2</sub> to CO at a Gold Electrode, *ChemElectroChem*, 2015, **2**(2), 213–217.
- <sup>4</sup> M. D. Sampson, A. D. Nguyen, K. A. Grice, C. E. Moore, A. L. Rheingold and C. P. Kubiak, Manganese Catalysts with Bulky Bipyridine Ligands for the Electrocatalytic Reduction of Carbon Dioxide: Eliminating Dimerization and Altering Catalysis, *J. Am. Chem. Soc.*, 2014, **136**(14), 5460–5471.
- <sup>5</sup> M. L. Clark, P. L. Cheung, M. Lessio, E. A. Carter and C. P. Kubiak, Kinetic and Mechanistic Effects of Bipyridine (Bpy) Substituent, Labile Ligand, and Brønsted Acid on Electrocatalytic CO<sub>2</sub> Reduction by Re (Bpy) Complexes, *ACS Catal.*, 2018, **8**(3), 2021–2029.
- <sup>6</sup> L. Chen, Z. Guo, X. G. Wie, C. Gallenkamp, J. Bonin and E. Anxolabéhère-Mallart, Molecular catalysis of the electrochemical and photochemical reduction of CO<sub>2</sub> with earth-abundant metal complexes. Selective production of CO vs HCOOH by switching of the metal center, *J. Am. Chem. Soc.*, 2015, **137**(34), 10918-10921.
- <sup>7</sup> H. Ishida, K. Tanaka and T. Tanaka, Electrochemical CO<sub>2</sub> Reduction Catalyzed by Ruthenium Complexes [Ru (Bpy)<sub>2</sub>(CO)<sub>2</sub>]<sup>2+</sup> and [Ru(Bpy)<sub>2</sub>(CO)Cl]<sup>+</sup>. Effect of PH on the Formation of CO and HCOO, *Organometallics* 1987, **6**(1), 181–186.
- <sup>8</sup> Z. Chen, C. Chen, D. R. Weinberg, P. Kang, J. J. Concepcion, D. P. Harrison, M. S. Brookhart and T. J. Meyer, Electrocatalytic Reduction of CO<sub>2</sub> to CO by Polypyridyl Ruthenium Complexes, *Chem. Comm.*, 2011, **47**(47), 12607–12609.
- <sup>9</sup> D. Z. Zee, M. Nippe, A. E. King, C. J. Chang and J. R. Long, Tuning Second Coordination Sphere Interactions in Polypyridyl–Iron Complexes to Achieve Selective Electrocatalytic Reduction of Carbon Dioxide to Carbon Monoxide, *Inorg. Chem.*, 2020, **59**(7), 5206–5217.
- <sup>10</sup> C. Cometto, L. Chen, P. K. Lo, Z. Guo, K. C. Lau, E. Anxolabéhère-Mallart, C. Fave, T. C. Lau and M. Robert, Highly Selective Molecular Catalysts for the CO<sub>2</sub>-to-CO Electrochemical Conversion at Very Low Overpotential. Contrasting Fe vs Co Quaterpyridine Complexes upon Mechanistic Studies, *ACS Catal.*, 2018, **8**(4), 3411–3417.
- <sup>11</sup> C. Costentin, S. Drouet, M. Robert and J. M. Savéant, Turnover Numbers, Turnover Frequencies, and Overpotential in Molecular Catalysis of Electrochemical Reactions. Cyclic Voltammetry and Preparative-Scale Electrolysis, *J. Am. Chem. Soc.*, 2012, **134**(27), 11235–

---

11242.

<sup>12</sup> E. S. Rountree, B. D. McCarthy, T. T. Eisenhart, J. L. Dempsey, Evaluation of Homogeneous Electrocatalysts by Cyclic Voltammetry. *Inorg. Chem.*, 2014, **53**(19), 9983-10002.

<sup>13</sup> T. Mashiko, C. A. Reed, K. J. Haller and W. R. Scheidt, Nature of iron(I) and iron(0) tetraphenylporphyrin complexes. Synthesis and molecular structure of (dibenzo-18-crown-6)bis(tetrahydrofuran)sodium (meso-tetraphenylporphinato)ferrate and bis[tris(tetrahydrofuran)sodium](meso-tetraporphinato)ferrate, *Inorg. Chem.*, 1984, **23**(20), 3192-3196.

<sup>14</sup> Y. Zhang, J. Chen, P. E. Siegbahn and R. Z. Liao, Harnessing Non-Innocent Porphyrin Ligand to Circumvent Fe-Hydride Formation in the Selective Fe-Catalyzed CO<sub>2</sub> Reduction in Aqueous Solution, *ACS Catal.*, 2020, **10**(11), 6332-6345.

<sup>15</sup> J. A. Keith, K. A. Grice, C. P. Kubiak, the selectivity of proton- dependent electrocatalytic CO<sub>2</sub> reduction by a fac-Re(bpy)(CO)<sub>3</sub>Cl, *J. Am. Chem. Soc.*, **2013**, 135, 15823-15829.

<sup>16</sup> S. Kozuch and S. Shaik, A Combined Kinetic– Quantum Mechanical Model for Assessment of Catalytic Cycles: Application to Cross-Coupling and Heck Reactions, *J. Am. Chem. Soc.*, 2006, **128**(10), 3355–3365.

<sup>17</sup> J. A. Christiansen, The Elucidation of Reaction Mechanisms by the Method of Intermediates in Quasi-Stationary Concentrations, In *Advances in Catalysis*; Elsevier, 1953; Vol. 5, pp 311–353.

<sup>18</sup> M. Loipersberger, D. Z. Zee, J. A. Panetier, C. J. Chang, J. R. Long and M. Head-Gordon, Computational Study of an Iron (II) Polypyridine Electrocatalyst for CO<sub>2</sub> Reduction: Key Roles for Intramolecular Interactions in CO<sub>2</sub> Binding and Proton Transfer, *Inorg. Chem.*, 2020, **59**(12), 8146-8160.

<sup>19</sup> K. T. Ngo, M. McKinnon, B. Mahanti, R. Narayanan, C. C. Grills, M. Z. Ertem and J. Rochford, Turning on the Protonation-First Pathway for Electrocatalytic CO<sub>2</sub> Reduction by Manganese Bipyridyl Tricarbonyl Complexes, *J. Am. Chem. Soc.*, 2017, **139**(7), 2604–2618.
